# Supplementary material
Source: PubMed Central journal article supplement (PMC4218864)
Supplement: NIHMS449862-supplement-1_si_001.pdf [file NIHMS449862-supplement-1_si_001.pdf]

# ***Nickel-Catalyzed Cross Couplings of Benzylic Pivalates with Arylboroxines: Stereospecific Formation of Diarylalkanes and Triarylmethanes***

Qi Zhou, Harathi D. Srinivas, Srimoyee Dasgupta, Mary P. Watson\*

Department of Chemistry and Biochemistry, University of Delaware, Newark, DE 19716

[mpwatson@udel.edu](mailto:mpwatson@udel.edu)

## Supporting Information

|                                                                                                      |      |
|------------------------------------------------------------------------------------------------------|------|
| General Information.....                                                                             | S2   |
| Effect of Solvent.....                                                                               | S3   |
| Effect of Water.....                                                                                 | S4   |
| Stereospecific Cross Couplings of Benzyl Pivalates to Give Diarylalkanes and<br>Triarylmethanes..... | S5   |
| Preparation of Benzyl Pivalates.....                                                                 | S21  |
| Preparation of Benzyl Alcohols.....                                                                  | S27  |
| Preparation of Pivalate <b>11</b> .....                                                              | S32  |
| $\beta$ -Hydride Elimination Experiment.....                                                         | S35  |
| Preparation of Ketones <b>S-7</b> and <b>S-11</b> .....                                              | S37  |
| NMR Spectra.....                                                                                     | S41  |
| HPLC Spectra.....                                                                                    | S121 |

## General Information

Reactions were performed either in a N<sub>2</sub>-atmosphere glovebox in oven-dried 1-dram vials with Teflon-lined caps or in oven-dried round-bottomed flasks unless otherwise noted. Flasks were fitted with rubber septa, and reactions were conducted under a positive pressure of N<sub>2</sub>. Stainless steel syringes or cannulae were used to transfer air- and moisture-sensitive liquids. Flash chromatography was performed on silica gel 60 (40-63 μm, 60Å). Thin layer chromatography (TLC) was performed on glass plates coated with silica gel 60 with F254 indicator. Commercial reagents were purchased from Sigma Aldrich, Acros, Fisher, Strem, TCI, Combi Blocks, Alfa Aesar, or Cambridge Isotopes Laboratories and used as received with the following exceptions: toluene, CH<sub>2</sub>Cl<sub>2</sub>, dioxane, and Et<sub>2</sub>O were dried by passing through drying columns.<sup>1</sup> Toluene was then degassed by sparging with N<sub>2</sub> and stored over activated 4Å MS in a N<sub>2</sub>-atmosphere glovebox. Anhydrous K<sub>3</sub>PO<sub>4</sub> was purchased from Acros and used as received. Pivaloyl chloride was purchased from Sigma Aldrich, and used as received. Boronic acids were purchased from Combi Blocks and were converted to the boroxines according to literature procedure.<sup>2</sup> CDCl<sub>3</sub> was stored over oven-dried potassium carbonate. Proton nuclear magnetic resonance (<sup>1</sup>H NMR) spectra and carbon nuclear magnetic resonance (<sup>13</sup>C NMR) spectra were recorded on both 400 MHz and 600 MHz spectrometers. Chemical shifts for protons are reported in parts per million downfield from tetramethylsilane and are referenced to residual protium in the NMR solvent (CHCl<sub>3</sub> = δ 7.28). Chemical shifts for carbon are reported in parts per million downfield from tetramethylsilane and are referenced to the carbon resonances of the solvent (CDCl<sub>3</sub> =

---

<sup>1</sup> Pangborn, A. B.; Giardello, M. A.; Grubbs, R. H.; Rosen, R. K.; Timmers, F. J. *Organometallics* **1996**, *15*, 1518.

<sup>2</sup> Xiao, Q.; Tian, L.; Tan, R.; Xia, Y.; Qiu, D.; Zhang, Y.; Wang, J. *Org. Lett.* **2012**, *14*, 4230.

$\delta$  77.07). Data are represented as follows: chemical shift, multiplicity (br = broad, s = singlet, d = doublet, t = triplet, q = quartet, p = pentet, m = multiplet, dd = doublet of doublets, h = heptet), coupling constants in Hertz (Hz), integration. Infrared (IR) spectra were obtained using FTIR spectrophotometers with material loaded onto a NaCl plate. The mass spectral data were obtained at the University of Illinois, Urbana–Champaign, mass spectrometry facility and the University of Delaware mass spectrometry facility. Optical rotations were measured using a 2.5 mL cell with a 1 dm path length. Melting points were taken on a Stuart SMP10 instrument.

### Effect of Solvent

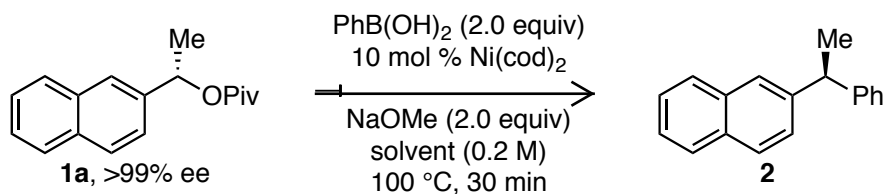

| entry | solvent                       | yield (%) <sup>a</sup> | ee (%) <sup>b</sup> |
|-------|-------------------------------|------------------------|---------------------|
| 1     | C <sub>6</sub> H <sub>6</sub> | 89                     | 94                  |
| 2     | PhMe                          | 87                     | 94                  |
| 3     | THF/PhMe (1:1)                | 56                     | 16                  |
| 4     | DME                           | 24                     | 10                  |
| 5     | Dioxane                       | 63                     | 7                   |

<sup>a</sup> Determined by <sup>1</sup>H NMR analysis using 1,3,5-trimethoxybenzene as internal standard. <sup>b</sup> Determined by chiral HPLC analysis.

## Effect of Water

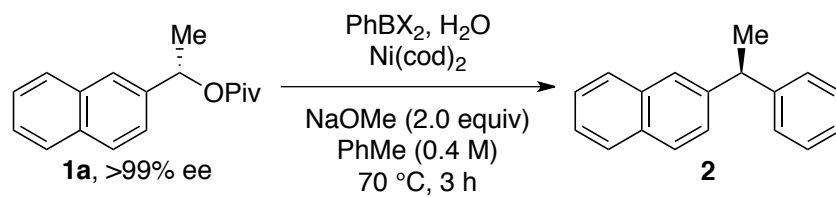

| entry | mol % Ni | $\text{PhBX}_2$ (equiv)         | equiv $\text{H}_2\text{O}$ | yield (%) <sup>a</sup> | ee (%) <sup>b</sup> |
|-------|----------|---------------------------------|----------------------------|------------------------|---------------------|
| 1     | 10       | $\text{PhB}(\text{OH})_2$ (3.0) | 0.5                        | 80                     | 98                  |
| 2     | 10       | $\text{PhB}(\text{OH})_2$ (3.0) | 1.0                        | 49                     | 94                  |
| 3     | 5        | $(\text{PhBO})_3$ (0.83)        | 0.5                        | 74                     | 96                  |
| 4     | 5        | $(\text{PhBO})_3$ (0.83)        | 1.0                        | 59                     | 94                  |
| 5     | 5        | $(\text{PhBO})_3$ (0.83)        | 2.5                        | 55                     | 92                  |

<sup>a</sup> Determined by  $^1\text{H}$  NMR analysis using 1,3,5-trimethoxybenzene as internal standard. <sup>b</sup> Determined by chiral HPLC analysis.



# Stereospecific Cross Couplings of Benzyl Pivalates to Give Diarylalkanes and Triarylmethanes

## General Procedure

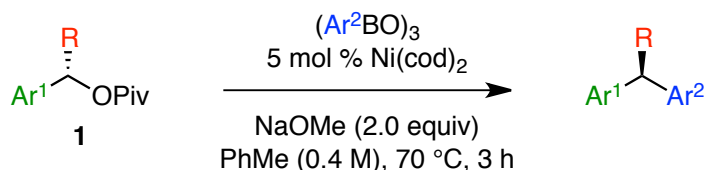

In a N<sub>2</sub>-atmosphere glovebox, Ni(cod)<sub>2</sub> (2.8 mg, 0.01 mmol, 5 mol %) and NaOMe (21.6 mg, 0.4 mmol, 2.0 equiv) were weighed into a 1-dram vial. Benzylic pivalate (0.2 mmol, 1.0 equiv) and boroxine (0.167 mmol, 0.83 equiv) were added, followed by toluene (0.5 mL, 0.4 M). The vial was capped with a Teflon-lined cap and removed from the glovebox. The mixture was heated for 3 h at 70 °C. The reaction mixture was then diluted with Et<sub>2</sub>O (1.5 mL) and filtered through a plug of silica gel, which was rinsed with Et<sub>2</sub>O (10 mL). The filtrate was concentrated and purified by silica gel chromatography to give the diaryl- or triarylmethane product.

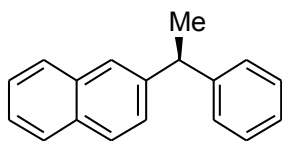

**(S)-2-(1-Phenylethyl)naphthalene (2).** Diarylethane **2** was prepared via the General Procedure using pivalate **1a** (prepared in >99% ee). The crude material was purified by silica gel chromatography (2–3% Et<sub>2</sub>O/hexanes) to give compound **2** (run 1: 41.8 mg, 90%; run 2: 40.4 mg, 87%) as a colorless oil. The enantiomeric excess was determined to be 98% ee (run 1: 98% ee; run 2: 98% ee) by chiral HPLC analysis (CHIRACEL OD-H, 0.8 mL/min, 100% hexane, λ=220 nm); *t*<sub>R</sub>(major)=21.40 min, *t*<sub>R</sub>(minor)=27.35 min. [α]<sub>D</sub><sup>24</sup> =

+21.0° (c 1.00, CHCl<sub>3</sub>): <sup>1</sup>H NMR (400 MHz, CDCl<sub>3</sub>) δ 7.87 – 7.80 (m, 2H), 7.78 (d, *J* = 8.5 Hz, 1H), 7.75 – 7.72 (m, 1H), 7.55 – 7.41 (m, 2H), 7.37 – 7.27 (m, 5H), 7.26 – 7.19 (m, 1H), 4.36 (q, *J* = 7.2 Hz, 1H), 1.78 (d, *J* = 7.2 Hz, 3H); <sup>13</sup>C NMR (101 MHz, CDCl<sub>3</sub>) δ 146.2, 143.8, 133.5, 132.1, 128.4, 127.9, 127.8, 127.7, 127.6, 126.9, 126.1, 125.9, 125.4, 125.3, 44.9, 21.8. The spectral data for this compound matches that reported in the literature.<sup>3</sup>

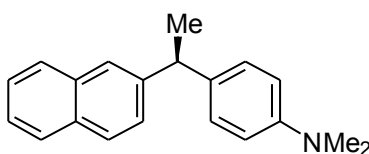

**(S)-N,N-Dimethyl-4-(1-(naphthalen-2-yl)ethyl)aniline**

**(3).** Diarylethane **3** was prepared via the General Procedure using pivalate **1a** (prepared in >99% ee), except that 10 mol% Ni(cod)<sub>2</sub> was used and the reaction mixture was heated at 90 °C for 12 h. The crude material was purified by silica gel chromatography (5–6% Et<sub>2</sub>O/hexanes) to give compound **3** (run 1: 35.2 mg, 64%; run 2: 34.1 mg, 62%) as a colorless oil. The enantiomeric excess was determined to be 86% ee (run 1: 86% ee; run 2: 86% ee) by chiral HPLC analysis (CHIRALPAK 1A, 1.0 mL/min, 0.3% *i*-PrOH/hexane, λ=254 nm); *t*<sub>R</sub>(major)=10.87 min, *t*<sub>R</sub>(minor)=9.35 min. [α]<sub>D</sub><sup>24</sup> = –62.5° (c 0.60, CHCl<sub>3</sub>): <sup>1</sup>H NMR (400 MHz, CDCl<sub>3</sub>) δ 7.82 – 7.76 (m, 2H), 7.73 (d, *J* = 8.5 Hz, 1H), 7.69 (d, *J* = 1.9 Hz, 1H), 7.48 – 7.38 (m, 2H), 7.32 (dd, *J* = 8.5, 1.8 Hz, 1H), 7.16 – 7.11 (m, 2H), 6.73 – 6.67 (m, 2H), 4.24 (q, *J* = 7.2 Hz, 1H), 2.91 (s, 6H), 1.70 (d, *J* = 7.2 Hz, 3H); <sup>13</sup>C NMR (101 MHz, CDCl<sub>3</sub>) δ 149.1, 144.7, 134.4, 133.5, 132.1, 128.3, 127.8, 127.7, 127.5, 126.9, 125.8, 125.2, 125.1, 112.8, 43.9, 40.8, 21.9; FTIR (NaCl/thin film) 3051, 2962, 2925, 2852, 2799, 1614, 1520, 1479, 1445, 1348, 1163, 1126, 948, 855, 816 cm<sup>-1</sup>; HRMS (ESI) [M]<sup>+</sup> calculated for C<sub>20</sub>H<sub>22</sub>N: 276.1752, found: 276.1751.

<sup>3</sup> López-Pérez, A.; Adrio, J.; Carretero, J. C. *Org. Lett.* **2009**, *11*, 5514.

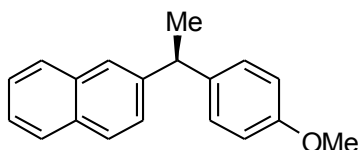

**(S)-2-(1-(4-Methoxyphenyl)ethyl)naphthalene (4).**

Diarylethane **4** was prepared via the General Procedure using pivalate **1a** (prepared in >99% ee). The crude material was purified by silica gel chromatography (3% Et<sub>2</sub>O/hexanes) to give compound **4** (run 1: 49.3 mg, 94%; run 2: 50.1 mg, 95%) as a colorless oil. The enantiomeric excess was determined to be 96% ee (run 1: 96% ee; run 2: 96% ee) by chiral HPLC analysis (CHIRAIPAK 1A, 1.0 mL/min, 0.2% *i*-PrOH/hexane,  $\lambda$ =254 nm);  $t_R$ (major)=8.64 min,  $t_R$ (minor)=8.09 min.  $[\alpha]_D^{24} = -14.0^\circ$  (c 1.00, CHCl<sub>3</sub>): <sup>1</sup>H NMR (400 MHz, CDCl<sub>3</sub>)  $\delta$  7.89 – 7.81 (m, 2H), 7.78 (d,  $J = 8.5$  Hz, 1H), 7.73 (s, 1H), 7.54 – 7.43 (m, 2H), 7.34 (dd,  $J = 8.5, 1.8$  Hz, 1H), 7.25 – 7.17 (m, 2H), 6.94 – 6.81 (m, 2H), 4.31 (q,  $J = 7.2$  Hz, 1H), 3.82 (s, 3H), 1.75 (d,  $J = 7.2$  Hz, 3H); <sup>13</sup>C NMR (101 MHz, CDCl<sub>3</sub>)  $\delta$  157.9, 144.2, 138.4, 133.5, 132.1, 128.7, 127.9, 127.7, 127.6, 126.8, 125.9, 125.3, 125.2, 113.8, 55.3, 44.0, 22.0. The spectral data for this compound matches that reported in the literature.<sup>4</sup>

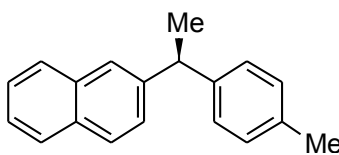

**(S)-2-(1-(*p*-Tolyl)ethyl)naphthalene (5).**

Diarylethane **5** was prepared via the General Procedure using pivalate **1a** (prepared in >99% ee). The crude material was purified by silica gel chromatography (2% Et<sub>2</sub>O/hexanes) to give compound **5** (run 1: 43.1 mg, 87%; run 2: 41.4 mg, 84%) as a colorless oil. The enantiomeric excess was determined to be 97% ee (run 1: 97% ee; run 2: 97% ee) by chiral HPLC analysis (CHIRACEL OD-H, 0.8 mL/min, 100% hexane,  $\lambda$ =220 nm);  $t_R$ (major)=20.43 min,  $t_R$ (minor)=23.63 min.  $[\alpha]_D^{24} =$

<sup>4</sup> Noji, M.; Ohno, T.; Fuji, K.; Futaba, N.; Tajima, H.; Ishii, K. *J. Org. Chem.* **2003**, *68*, 9340.

+51.2° (c 0.80, CHCl<sub>3</sub>): <sup>1</sup>H NMR (400 MHz, CDCl<sub>3</sub>) δ 7.85 – 7.80 (m, 2H), 7.78 (d, 1H), 7.76 – 7.72 (m, 1H), 7.52 – 7.43 (m, 2H), 7.34 (dd, *J* = 8.5, 1.8 Hz, 1H), 7.22 – 7.11 (m, 4H), 4.32 (q, *J* = 7.2 Hz, 1H), 2.35 (s, 3H), 1.76 (d, *J* = 7.2 Hz, 3H); <sup>13</sup>C NMR (101 MHz, CDCl<sub>3</sub>) δ 144.0, 143.3, 135.6, 133.5, 132.1, 129.1, 127.9, 127.7, 127.6, 127.6, 126.9, 125.9, 125.3, 125.3, 44.5, 21.9, 21.0. The spectral data for this compound matches that reported in the literature.<sup>5</sup>

The absolute configuration of this compound was assigned as *S* by comparison of the HPLC of this compound to an authentic sample previously prepared in our group via a different method.<sup>6</sup>

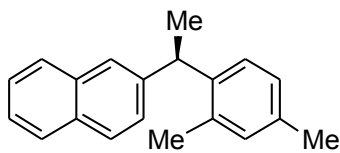

**(*R*)-2-(1-(2,4-Dimethylphenyl)ethyl)naphthalene (6).**

Diarylethane **6** was prepared via the General Procedure using pivalate **1a** (prepared in >99% ee). The crude material was purified by silica gel chromatography (3% Et<sub>2</sub>O/hexanes) to give compound **6** (run 1: 49.1 mg, 93%; run 2: 49.3 mg, 96%) as a colorless oil. The enantiomeric excess was determined to be 96% ee (run 1: 96% ee; run 2: 96% ee) by chiral HPLC analysis (CHIRACEL OD-H, 0.8 mL/min, 100% hexane, λ=220 nm); *t*<sub>R</sub>(major)=17.61 min, *t*<sub>R</sub>(minor)=14.35 min. [α]<sub>D</sub><sup>24</sup> = +11.0° (c 1.00, CHCl<sub>3</sub>): <sup>1</sup>H NMR (400 MHz, CDCl<sub>3</sub>) δ 7.84 – 7.79 (m, 2H), 7.76 (d, *J* = 8.5 Hz, 1H), 7.68 – 7.64 (m, 1H), 7.51 – 7.41 (m, 2H), 7.31 (dd, *J* = 8.5, 1.8 Hz, 1H), 7.22 (d, *J* = 7.8 Hz, 1H), 7.10 – 7.04 (m, 1H), 7.02 (s, 1H), 4.49 (q, *J* = 7.2 Hz, 1H), 2.35 (s, 3H), 2.29 (s, 3H), 1.72 (d, *J* = 7.1 Hz, 3H); <sup>13</sup>C NMR (101 MHz, CDCl<sub>3</sub>) δ 143.9, 140.9, 136.0, 135.6, 133.5, 131.9, 131.3, 127.9, 127.7, 127.6, 126.9, 126.9, 126.7, 125.9, 125.4, 125.3, 40.8, 22.0, 20.9, 19.8;

<sup>5</sup> Clark, P. D.; McKinnon, D. M. *Can. J. Chem.* **1981**, *59*, 1297.

<sup>6</sup> Maity, P.; Shacklady-McAtee, D. M.; Yap, G. P. A.; Sirianni, E. R.; Watson, M. P. *J. Am. Chem. Soc.* **2012**, accepted.

FTIR (NaCl/thin film) 3052, 3015, 2965, 2922, 1600, 1500, 1451, 1373, 1043, 855  $\text{cm}^{-1}$ ;  
HRMS (EI+)  $[\text{M}]^+$  calculated for  $\text{C}_{20}\text{H}_{20}$ : 260.1565, found: 260.1573.

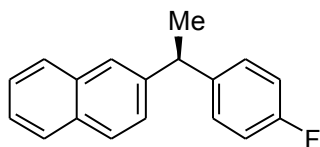

**(S)-2-(1-(4-Fluorophenyl)ethyl)naphthalene (7).**

Diarylethane **7** was prepared via the General Procedure using pivalate **1a** (prepared in >99% ee). The crude material was purified by silica gel chromatography (2–2.5%  $\text{Et}_2\text{O}$ /hexanes) to give compound **7** (run 1: 44.2 mg, 88%; run 2: 42.8 mg, 85%) as a white solid (mp 57–61  $^{\circ}\text{C}$ ). The enantiomeric excess was determined to be 96% ee (run 1: 97% ee; run 2: 95% ee) by chiral HPLC analysis (CHIRACEL OD-H, 0.8 mL/min, 100% hexane,  $\lambda=220$  nm);  $t_{\text{R}}(\text{major})=26.20$  min,  $t_{\text{R}}(\text{minor})=34.62$  min.  $[\alpha]_{\text{D}}^{24} = -31.0^{\circ}$  (c 1.60,  $\text{CHCl}_3$ );  $^1\text{H}$  NMR (400 MHz,  $\text{CDCl}_3$ )  $\delta$  7.86 – 7.81 (m, 2H), 7.78 (d,  $J = 8.5$  Hz, 1H), 7.72 – 7.68 (m, 1H), 7.53 – 7.44 (m, 2H), 7.31 (dd,  $J = 8.4, 1.8$  Hz, 1H), 7.27 – 7.22 (m, 2H), 7.05 – 6.97 (m, 2H), 4.33 (q,  $J = 7.2$  Hz, 1H), 1.75 (d,  $J = 7.2$  Hz, 3H);  $^{13}\text{C}$  NMR (101 MHz,  $\text{CDCl}_3$ )  $\delta$  161.3 (d,  $J_{\text{C-F}} = 245.4$  Hz), 143.6, 141.9 (d,  $J_{\text{C-F}} = 3.0$  Hz), 133.5, 132.1, 129.1 (d,  $J_{\text{C-F}} = 8.1$  Hz), 128.1, 127.7, 127.6, 126.7, 126.1, 125.5, 125.3, 115.1 (d,  $J_{\text{C-F}} = 21.2$  Hz), 44.1, 22.0. The spectral data for this compound matches that reported in the literature.<sup>6</sup>

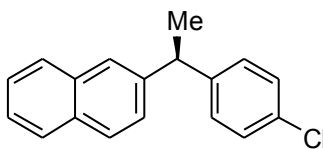

**(S)-2-(1-(4-Chlorophenyl)ethyl)naphthalene (8).**

Diarylethane **8** was prepared via the General Procedure using pivalate **1a** (prepared in >99% ee) except that the reaction was done at 40  $^{\circ}\text{C}$  for 24 h. The crude material was purified by silica gel chromatography (100% petroleum ether) to give compound **8** (run 1: 34.5 mg, 65%; run 2: 32.5 mg, 61%) as a colorless oil. The enantiomeric excess was determined to be 94% ee (run 1: 94% ee;

run 2: 94% ee) by chiral HPLC analysis (CHIRACEL OD-H, 0.8 mL/min, 100% hexane,  $\lambda=220$  nm);  $t_R(\text{major})=25.82$  min,  $t_R(\text{minor})=34.31$  min.  $[\alpha]_D^{24} = -27.7^\circ$  (c 1.00,  $\text{CHCl}_3$ ):  $^1\text{H}$  NMR (400 MHz,  $\text{CDCl}_3$ )  $\delta$  7.82 (d,  $J = 8.4$  Hz, 2H), 7.77 (d,  $J = 8.5$  Hz, 1H), 7.69 (s, 1H), 7.51 – 7.44 (m, 2H), 7.31 – 7.26 (m, 3H), 7.23 – 7.18 (m, 2H), 4.31 (q,  $J = 7.2$  Hz, 1H), 1.74 (d,  $J = 7.2$  Hz, 3H);  $^{13}\text{C}$  NMR (101 MHz,  $\text{CDCl}_3$ )  $\delta$  144.7, 143.2, 133.5, 132.2, 131.8, 129.2, 128.5, 128.1, 127.7, 127.6, 126.7, 126.1, 125.6, 125.4, 44.3, 21.8; FTIR (NaCl/thin film) 3054, 2966, 2925, 2851, 1600, 1491, 1375, 1092, 1014, 856  $\text{cm}^{-1}$ ; HRMS (EI+)  $[\text{M}]^+$  calculated for  $\text{C}_{18}\text{H}_{15}\text{Cl}$ : 266.0862, found: 266.0855.

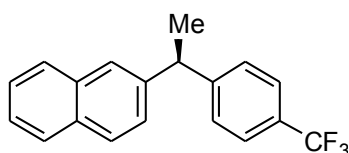

**(S)-2-(1-(4-(Trifluoromethyl)phenyl)ethyl)naphthalene**

**(9)**. Diarylethane **9** was prepared via the General Procedure using pivalate **1a** (prepared in >99% ee). The crude material was purified by silica gel chromatography (3%  $\text{Et}_2\text{O}$ /hexanes) to give compound **9** (run 1: 59.4 mg, 99%; run 2: 60.0 mg, 100%) as a colorless oil. The enantiomeric excess was determined to be 97% ee (run 1: 96% ee; run 2: 97% ee) by chiral HPLC analysis (CHIRACEL OD-H, 0.8 mL/min, 100% hexane,  $\lambda=220$  nm);  $t_R(\text{major})=28.30$  min,  $t_R(\text{minor})=39.14$  min.  $[\alpha]_D^{24} = +36.4^\circ$  (c 1.60,  $\text{CHCl}_3$ ):  $^1\text{H}$  NMR (400 MHz,  $\text{CDCl}_3$ )  $\delta$  7.87 – 7.82 (m, 2H), 7.80 (d,  $J = 8.5$  Hz, 1H), 7.75 – 7.72 (m, 1H), 7.58 (d,  $J = 8.1$  Hz, 2H), 7.54 – 7.46 (m, 2H), 7.42 – 7.38 (m, 2H), 7.31 (dd,  $J = 8.6, 1.8$  Hz, 1H), 4.41 (q,  $J = 7.2$  Hz, 1H), 1.79 (d,  $J = 7.2$  Hz, 3H);  $^{13}\text{C}$  NMR (101 MHz,  $\text{CDCl}_3$ )  $\delta$  150.3 (q,  $J_{\text{C-F}} = 1.1$  Hz), 142.6, 133.5, 132.2, 128.4 (q,  $J_{\text{C-F}} = 32.3$  Hz), 128.3 (q,  $J_{\text{C-F}} = 1.0$  Hz), 128.1, 127.8, 127.6, 126.6, 126.2, 125.7, 125.5, 125.4 (q,  $J_{\text{C-F}} = 4.0$  Hz), 124.8 (q,  $J_{\text{C-F}} = 272.7$  Hz), 44.7, 21.6; FTIR (NaCl/thin film) 3056, 2970, 2932, 2876, 1919, 1618, 1600, 1416, 1326, 1164, 1118, 1071, 1017, 842  $\text{cm}^{-1}$ ; HRMS (EI+)  $[\text{M}]^+$  calculated for  $\text{C}_{19}\text{H}_{15}\text{F}_3$ : 300.1126, found: 300.1129.

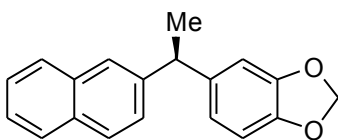

**(R)-5-(1-(Naphthalen-2-yl)ethyl)benzo[d][1,3]dioxole (10).**

Diarylethane **10** was prepared via the General Procedure using pivalate **1a** (prepared in >99% ee). The crude material was purified by silica gel chromatography (2% Et<sub>2</sub>O/hexanes) to give compound **10** (run 1: 48.2 mg, 88%; run 2: 47.1 mg, 85%) as a colorless oil. The enantiomeric excess was determined to be 97% ee (run 1: 97% ee; run 2: 96% ee) by chiral HPLC analysis (CHIRALPAK 1B, 1.0 mL/min, 0.3% *i*-PrOH/hexane,  $\lambda$ =254 nm);  $t_{\text{R}}(\text{major})=9.30$  min,  $t_{\text{R}}(\text{minor})=10.14$  min.  $[\alpha]_{\text{D}}^{24} = -10.8^{\circ}$  (c 1.20, CHCl<sub>3</sub>); <sup>1</sup>H NMR (400 MHz, CDCl<sub>3</sub>)  $\delta$  7.84 – 7.77 (m, 2H), 7.75 (d,  $J = 8.5$  Hz, 1H), 7.71 – 7.66 (m, 1H), 7.52 – 7.39 (m, 2H), 7.30 (dd,  $J = 8.5, 1.8$  Hz, 1H), 6.78 – 7.66 (m, 3H), 5.91 (s, 2H), 4.24 (q,  $J = 7.2$  Hz, 1H), 1.70 (d,  $J = 7.2$  Hz, 3H); <sup>13</sup>C NMR (101 MHz, CDCl<sub>3</sub>)  $\delta$  147.7, 145.8, 143.8, 140.3, 133.5, 132.1, 127.9, 127.7, 127.6, 126.7, 125.9, 125.4, 125.2, 120.5, 108.4, 108.1, 100.9, 44.6, 21.9; FTIR (NaCl/thin film) 3065, 2964, 2919, 1726, 1603, 1507, 1484, 1435, 1370, 1231, 1036, 940, 861 cm<sup>-1</sup>; HRMS (EI+) [M]<sup>+</sup> calculated for C<sub>19</sub>H<sub>16</sub>O<sub>2</sub>: 276.1150, found: 276.1154.

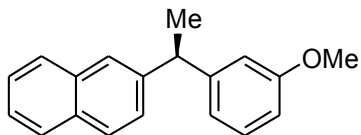

**(R)-2-(1-(3-Methoxyphenyl)ethyl)naphthalene (11).**

Diarylethane **11** was prepared via the General Procedure using pivalate **1a** (prepared in >99% ee). The crude material was purified by silica gel chromatography (2% Et<sub>2</sub>O/hexanes) to give compound **11** (run 1: 49.5 mg, 94%; run 2: 51.2 mg, 97%) as a white solid (mp 88–91 °C). The enantiomeric excess was determined to be 98% ee (run 1: 97% ee; run 2: 98% ee) by chiral HPLC analysis (CHIRALPAK 1A, 1.0 mL/min, 0.2% *i*-PrOH/hexane,  $\lambda$ =254 nm);  $t_{\text{R}}(\text{major})=7.54$  min,  $t_{\text{R}}(\text{minor})=8.69$  min.  $[\alpha]_{\text{D}}^{24} = -23.3^{\circ}$  (c 1.20, CHCl<sub>3</sub>); <sup>1</sup>H NMR (400 MHz, CDCl<sub>3</sub>)  $\delta$  7.86 – 7.80 (m, 2H), 7.77 (d,  $J = 8.5$  Hz, 1H), 7.74 – 7.72 (m, 1H), 7.52 – 7.42 (m, 2H), 7.35 (dd,  $J = 8.5, 1.8$  Hz,

1H), 7.24 (t,  $J = 7.9$  Hz, 1H), 6.89 – 6.87 (m, 1H), 6.85 (t,  $J = 2.1$  Hz, 1H), 6.77 (dd, 1H), 4.32 (q,  $J = 7.2$  Hz, 1H), 3.79 (s, 3H), 1.76 (d,  $J = 7.2$  Hz, 3H);  $^{13}\text{C}$  NMR (101 MHz,  $\text{CDCl}_3$ )  $\delta$  159.6, 147.9, 143.6, 133.5, 132.1, 129.4, 128.0, 127.8, 127.6, 126.8, 126.0, 125.4, 125.3, 120.3, 113.9, 111.0, 55.2, 44.9, 21.7; FTIR (NaCl/thin film) 3052, 2963, 2926, 1598, 1485, 1150, 1039, 818  $\text{cm}^{-1}$ ; HRMS (EI+)  $[\text{M}]^+$  calculated for  $\text{C}_{10}\text{H}_{18}\text{O}$ : 262.1358, found: 262.1366.

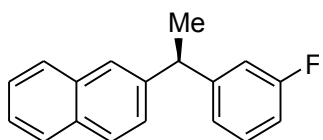

**(R)-2-(1-(3-Fluorophenyl)ethyl)naphthalene (12).**

Diarylethane **12** was prepared via the General Procedure using pivalate **1a** (prepared in >99% ee). The crude material was purified by silica gel chromatography (3%  $\text{Et}_2\text{O}$ /hexanes) to give compound **12** (run 1: 44.3 mg, 88%; run 2: 45.5 mg, 91%) as a colorless oil. The enantiomeric excess was determined to be 94% ee (run 1: 94% ee; run 2: 94% ee) by chiral HPLC analysis (CHIRACEL OD-H, 0.8 mL/min, 100% hexane,  $\lambda=220$  nm);  $t_{\text{R}}$ (major)=24.61 min,  $t_{\text{R}}$ (minor)=35.64 min.  $[\alpha]_{\text{D}}^{24} = +22.5^\circ$  (c 1.20,  $\text{CHCl}_3$ ):  $^1\text{H}$  NMR (400 MHz,  $\text{CDCl}_3$ )  $\delta$  7.87 – 7.81 (m, 2H), 7.79 (d,  $J = 8.5$  Hz, 1H), 7.75 – 7.71 (m, 1H), 7.54 – 7.45 (m, 2H), 7.36 – 7.30 (m, 1H), 7.29 – 7.24 (m, 1H), 7.10 – 7.05 (m, 1H), 7.02 – 6.97 (m, 1H), 6.95 – 6.89 (m, 1H), 4.34 (q,  $J = 7.2$  Hz, 1H), 1.76 (d,  $J = 7.2$  Hz, 3H);  $^{13}\text{C}$  NMR (101 MHz,  $\text{CDCl}_3$ )  $\delta$  163.0 (d,  $J_{\text{C-F}} = 246.4$  Hz), 148.9 (d,  $J_{\text{C-F}} = 6.1$  Hz), 143.0, 133.5, 132.2, 129.8 (d,  $J_{\text{C-F}} = 8.1$  Hz), 128.1, 127.8, 127.6, 126.6, 126.1, 125.6, 125.4, 123.5 (d,  $J_{\text{C-F}} = 3.0$  Hz), 114.6 (d,  $J_{\text{C-F}} = 22.2$  Hz), 113.0 (d,  $J_{\text{C-F}} = 21.2$  Hz), 44.6, 21.6; FTIR (NaCl/thin film) 3055, 2967, 2928, 2873, 1726, 1613, 1559, 1487, 912, 818  $\text{cm}^{-1}$ ; HRMS (EI+)  $[\text{M}]^+$  calculated for  $\text{C}_{18}\text{H}_{15}\text{F}$ : 250.1158, found: 250.1164.



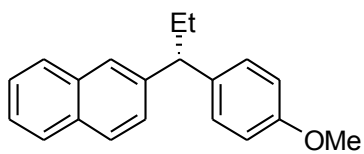

**(R)-2-(1-(4-methoxyphenyl)propyl)naphthalene (13).**

Diarylpropane **13** was prepared via the General Procedure using pivalate **1b** (prepared in >99% ee) except that 10 mol % Ni(cod)<sub>2</sub> and 1.2 equiv of boroxine were used, and the reaction mixture was heated at 80 °C. The crude material was purified by silica gel chromatography (2.5% Et<sub>2</sub>O/hexanes) to give compound **13** (run 1: 38.1 mg, 69%; run 2: 40.2 mg, 73%) as a colorless oil. The enantiomeric excess was determined to be 94% ee (run 1: 94% ee; run 2: 94% ee) by chiral HPLC analysis (CHIRACEL OD-H, 0.8 mL/min, 0.1% *i*-PrOH/hexane, λ=254 nm); *t*<sub>R</sub>(major)=14.00 min, *t*<sub>R</sub>(minor)=13.23 min. [α]<sub>D</sub><sup>24</sup> = -19.0° (c 1.00, CHCl<sub>3</sub>); <sup>1</sup>H NMR (400 MHz, CDCl<sub>3</sub>) δ 7.87 – 7.69 (m, 4H), 7.55 – 7.39 (m, 2H), 7.34 (dd, *J* = 8.5, 1.8 Hz, 1H), 7.26 – 7.18 (m, 2H), 6.91 – 6.79 (m, 2H), 3.93 (t, *J* = 7.7 Hz, 1H), 3.79 (s, 3H), 2.30 – 2.05 (m, 2H), 0.95 (t, *J* = 7.3 Hz, 3H); <sup>13</sup>C NMR (101 MHz, CDCl<sub>3</sub>) δ 157.8, 142.9, 137.2, 133.5, 132.1, 128.9, 127.9, 127.7, 127.6, 126.8, 125.9, 125.8, 125.3, 113.7, 55.2, 52.4, 28.5, 12.9; FTIR (NaCl/thin film) 3050, 2959, 2929, 2872, 2834, 1726, 1609, 1510, 1462, 1249, 1178, 1038, 815 cm<sup>-1</sup>; HRMS (EI+) [M]<sup>+</sup> calculated for C<sub>20</sub>H<sub>20</sub>O: 276.1514, found: 276.1505.

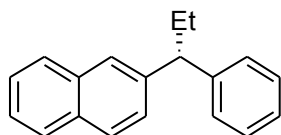

**(R)-2-(1-Phenylpropyl)naphthalene (14).**

Diarylpropane **14** was prepared via the General Procedure using pivalate **1b** (prepared in >99% ee) except that 1.2 equiv of boroxine was used and the reaction mixture was heated at 80 °C. The crude material was purified by silica gel chromatography (3% Et<sub>2</sub>O/hexanes) to give compound **14** (run 1: 44.6 mg, 91%; run 2: 47.2 mg, 94%) as a colorless oil. The enantiomeric excess was determined to be 97% ee (run 1: 96% ee; run 2: 98% ee) by chiral HPLC analysis (CHIRACEL OD-H, 1.0 mL/min, 100% hexanes, λ=220 nm); *t*<sub>R</sub>(major)=19.18 min, *t*<sub>R</sub>(minor)=14.40 min. [α]<sub>D</sub><sup>24</sup> = -32.5° (c 0.80, CHCl<sub>3</sub>); <sup>1</sup>H NMR (400 MHz, CDCl<sub>3</sub>) δ 7.87 – 7.72 (m, 4H), 7.54 – 7.41 (m, 3H), 7.37 (dd, *J* = 8.5, 1.8 Hz, 1H), 7.35 – 7.29 (m, 3H), 7.26 – 7.16 (m, 1H),

4.00 (t,  $J = 7.7$  Hz, 1H), 2.28 – 2.15 (m, 2H), 0.98 (t,  $J = 7.3$  Hz, 3H);  $^{13}\text{C}$  NMR (101 MHz,  $\text{CDCl}_3$ )  $\delta$  145.0, 142.6, 133.5, 132.1, 128.4, 128.1, 128.0, 127.7, 127.6, 126.9, 126.1, 125.9, 125.9, 125.3, 53.3, 28.4, 12.9; FTIR (NaCl/thin film) 3056, 3025, 2962, 2928, 2872, 1727, 1599, 1506, 1493, 1377, 1155, 855  $\text{cm}^{-1}$ ; HRMS (EI+)  $[\text{M}]^+$  calculated for  $\text{C}_{10}\text{H}_{18}$ : 246.1409, found: 246.1414.

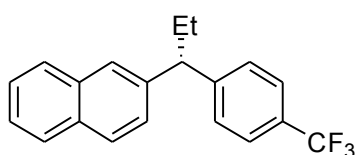

**(R)-2-(1-(4-(Trifluoromethyl)phenyl)propyl)naphthalene (15).**

Diarylpropane **15** was prepared via the General Procedure using pivalate **1b** (prepared in >99% ee) except that 1.2 equiv of boroxine was used and the reaction mixture was heated at 80 °C. The crude material was purified by silica gel chromatography (3%  $\text{Et}_2\text{O}$ /hexanes) to give compound **15** (run 1: 58.4 mg, 93%; run 2: 59.2 mg, 94%) as a colorless oil. The enantiomeric excess was determined to be 96% ee (run 1: 96% ee; run 2: 96% ee) by chiral HPLC analysis (CHIRACEL OD-H, 0.8 mL/min, 100% hexanes,  $\lambda=220$  nm);  $t_{\text{R}}(\text{major})=31.94$  min,  $t_{\text{R}}(\text{minor})=19.93$  min.  $[\alpha]_{\text{D}}^{24} = -78.3^\circ$  (c 0.60,  $\text{CHCl}_3$ );  $^1\text{H}$  NMR (400 MHz,  $\text{CDCl}_3$ )  $\delta$  7.87 – 7.81 (m, 2H), 7.80 (d,  $J = 8.5$  Hz, 1H), 7.76 – 7.73 (m, 1H), 7.57 (d,  $J = 8.1$  Hz, 2H), 7.54 – 7.45 (m, 2H), 7.43 (d,  $J = 8.0$  Hz, 2H), 7.34 (dd,  $J = 8.5, 1.8$  Hz, 1H), 4.06 (t,  $J = 7.7$  Hz, 1H), 2.35 – 2.11 (m, 2H), 0.99 (t,  $J = 7.3$  Hz, 3H);  $^{13}\text{C}$  NMR (101 MHz,  $\text{CDCl}_3$ )  $\delta$  149.1 (q,  $J_{\text{C-F}} = 1.1$  Hz), 141.5, 133.5, 133.2, 128.4 (q,  $J_{\text{C-F}} = 32.3$  Hz), 128.4 (q,  $J_{\text{C-F}} = 1.0$  Hz), 128.3, 127.8, 127.6, 126.7, 125.2, 125.1, 125.6, 125.4 (q,  $J_{\text{C-F}} = 4.0$  Hz), 124.3 (q,  $J_{\text{C-F}} = 272.7$  Hz), 53.1, 28.2, 12.7; FTIR (NaCl/thin film) 3056, 2965, 2932, 2875, 1921, 1766, 1618, 1417, 1326, 1164, 1120, 1068, 1018, 815  $\text{cm}^{-1}$ ; HRMS (EI+)  $[\text{M}]^+$  calculated for  $\text{C}_{20}\text{H}_{17}\text{F}_3$ : 314.1282, found: 314.1287.

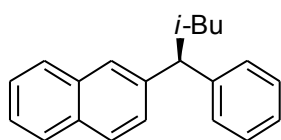

**(S)-2-(3-Methyl-1-phenylbutyl)naphthalene (16).**

Diarylmethane **16** was prepared via the General Procedure using pivalate **1c** (prepared in 93% ee) except that 1.3 equiv of boroxine was used and the reaction time was 12 h. The crude material was purified by silica gel chromatography (1–2% Et<sub>2</sub>O/hexanes) to give compound **16** (run 1: 40.2 mg, 73%; run 2: 39.0 mg, 71%) as a colorless oil. The enantiomeric excess was determined to be 91% ee (run 1: 90% ee; run 2: 91% ee) by chiral HPLC analysis (CHIRACEL OD-H, 0.8 mL/min, 100% hexanes,  $\lambda=220$  nm);  $t_R(\text{major})=15.47$  min,  $t_R(\text{minor})=25.37$  min.  $[\alpha]_D^{24} = -32.8^\circ$  (c 0.60, CHCl<sub>3</sub>): <sup>1</sup>H NMR (400 MHz, CDCl<sub>3</sub>)  $\delta$  7.71 (dd,  $J = 12.7, 8.0$  Hz, 2H), 7.66 (d,  $J = 8.5$  Hz, 1H), 7.64 – 7.62 (m, 1H), 7.39 – 7.31 (m, 2H), 7.28 (dd,  $J = 8.6, 1.8$  Hz, 1H), 7.24 – 7.17 (m, 4H), 7.11 – 7.07 (m, 1H), 4.11 (t,  $J = 8.0$  Hz, 1H), 2.02 – 1.88 (m, 2H), 1.46 – 1.37 (m, 1H), 0.87 (d,  $J = 2.4$  Hz, 3H), 0.87 (d,  $J = 2.4$  Hz, 3H); <sup>13</sup>C NMR (151 MHz, CDCl<sub>3</sub>)  $\delta$  145.1, 142.7, 133.5, 132.1, 128.4, 128.01, 128.0, 127.6, 127.5, 126.8, 126.07, 125.8, 125.8, 125.3, 48.9, 44.7, 25.5, 22.7, 22.6; FTIR (NaCl/thin film) 3056, 2965, 2932, 2875, 1921, 1766, 1618, 1417, 1326, 1164, 1120, 1068, 1018, 815 cm<sup>-1</sup>; HRMS (EI+) [M]<sup>+</sup> calculated for C<sub>21</sub>H<sub>22</sub>: 274.1722, found: 274.1717.

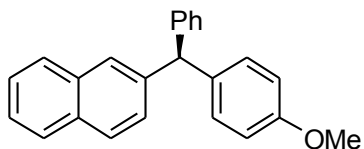

**(S)-2-((4-Methoxyphenyl)(phenyl)methyl)naphthalene (17).**

Triarylmethane **17** was prepared via the General Procedure using pivalate **1d** (prepared in >99% ee) except that 10 mol % of Ni(cod)<sub>2</sub> and 1.0 equiv of boroxine were used and the reaction mixture was heated at 90 °C. The crude material was purified by silica gel chromatography (5% Et<sub>2</sub>O/hexanes) to give compound **17** (run 1: 55.2 mg, 85%; run 2: 54.3 mg, 84%) as a colorless oil. The enantiomeric excess was determined to be 86% ee (run 1: 86% ee; run 2: 86% ee) by chiral HPLC analysis (CHIRACEL OD-H, 0.8 mL/min, 0.1% *i*-PrOH/hexane,  $\lambda=254$  nm);

$t_R(\text{major})=24.00$  min,  $t_R(\text{minor})=22.03$  min.  $[\alpha]_D^{24} = +3.7^\circ$  (c 1.60,  $\text{CHCl}_3$ ):  $^1\text{H}$  NMR (400 MHz,  $\text{CDCl}_3$ )  $\delta$  7.85 – 7.81 (m, 1H), 7.79 (d,  $J = 8.5$  Hz, 1H), 7.76 – 7.71 (m, 1H), 7.50 – 7.44 (m, 3H), 7.35 – 7.30 (m, 3H), 7.28 – 7.23 (m, 1H), 7.21 – 7.16 (m, 2H), 7.13 – 7.08 (m, 2H), 6.90 – 6.84 (m, 2H), 5.69 (s, 1H), 3.82 (s, 3H);  $^{13}\text{C}$  NMR (101 MHz,  $\text{CDCl}_3$ )  $\delta$  158.1, 144.0, 141.9, 135.9, 133.4, 132.1, 130.5, 129.5, 128.4, 128.1, 127.9, 127.9, 127.7, 127.6, 126.3, 125.9, 125.6, 113.7, 56.1, 55.3. The spectral data for this compound matches that reported in the literature.<sup>7</sup>

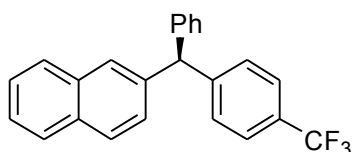

**(S)-2-(Phenyl(4-(trifluoromethyl)phenyl)methyl)naphthalene (18).**

Triarylmethane **18** was prepared via the General Procedure using pivalate **1d** (prepared in >99% ee) except that 10 mol % of  $\text{Ni}(\text{cod})_2$  and 1.0 equiv of boroxine were used and the reaction mixture was heated at 90 °C. The crude material was purified by silica gel chromatography (1%  $\text{Et}_2\text{O}$ /hexanes) to give compound **18** (70.4 mg, 96%) as a colorless oil. The enantiomeric excess was determined to be 80% ee by chiral HPLC analysis (CHIRALPAK 1B, 0.6 mL/min, 100% hexane,  $\lambda=254$  nm);  $t_R(\text{major})= 21.44$  min,  $t_R(\text{minor})= 23.27$  min.  $[\alpha]_D^{24} = -8.8^\circ$  (c 1.92,  $\text{CHCl}_3$ ):  $^1\text{H}$  NMR (400 MHz,  $\text{CDCl}_3$ )  $\delta$  7.76 – 7.72 (m, 1H), 7.71 (d,  $J = 8.5$  Hz, 1H), 7.66 – 7.62 (m, 1H), 7.48 (d,  $J = 8.1$  Hz, 2H), 7.40 – 7.36 (m, 3H), 7.27 – 7.22 (m, 2H), 7.22 – 7.16 (m, 4H), 7.07 (dd,  $J = 7.2, 1.7$  Hz, 2H), 5.68 (s, 1H);  $^{13}\text{C}$  NMR (151 MHz,  $\text{CDCl}_3$ )  $\delta$  147.8, 142.8, 140.5, 133.4, 132.3, 129.9, 129.0, 128.8 (q,  $J_{\text{C-F}} = 32.1$  Hz), 128.6, 128.5, 128.2, 128.9 (q,  $J_{\text{C-F}} = 1.5$  Hz), 127.8, 127.6, 126.8, 126.2, 125.9, 125.4 (q,  $J_{\text{C-F}} = 3.9$  Hz), 124.3 (q,  $J_{\text{C-F}} = 273.5$ ), 56.8; FTIR (NaCl/thin film) 3058, 3027, 2926, 1924, 1600, 1494, 1416, 1326, 1165, 1068, 814  $\text{cm}^{-1}$ ; HRMS (EI+)  $[\text{M}]^+$  calculated for  $\text{C}_{24}\text{H}_{17}\text{F}_3$ : 362.1824, found: 362.1276.

<sup>7</sup> Taylor, B. L. H.; Harris, R. M.; Jarvo, E. R. *Angew. Chem. Int. Ed.* **2012**, *24*, 7910.

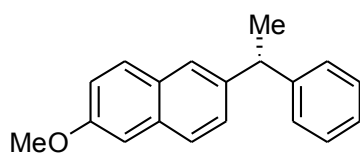

**(R)-2-Methoxy-6-(1-phenylethyl)naphthalene (19).**

Diarylethane **19** was prepared via the General Procedure using pivalate **1e** (prepared in >99% ee) except that 1.0 equiv of boroxine was used and the reaction mixture was heated at 50 °C. The crude material was purified by silica gel chromatography (1–2% Et<sub>2</sub>O/hexanes) to give compound **19** (run 1: 45.6 mg, 87%; run 2: 45.5 mg, 87%) as a white solid (mp 97–101 °C). The enantiomeric excess was determined to be 93% ee (run 1: 93% ee; run 2: 93% ee) by chiral HPLC analysis (CHIRALPAK 1B, 0.6 mL/min, 1.0% *i*-PrOH/hexane, λ=254 nm);  $t_R(\text{major})=11.29$  min,  $t_R(\text{minor})=9.83$  min.  $[\alpha]_D^{24} = -28.2^\circ$  (c 1.00, CHCl<sub>3</sub>); <sup>1</sup>H NMR (400 MHz, CDCl<sub>3</sub>) δ 7.73 (d,  $J = 8.9$  Hz, 1H), 7.69 (s, 1H), 7.68 – 7.66 (m, 1H), 7.36 – 7.28 (m, 5H), 7.26 – 7.20 (m, 1H), 7.17 (dd,  $J = 8.8, 2.6$  Hz, 1H), 7.15 – 7.12 (m, 1H), 4.32 (q,  $J = 7.2$  Hz, 1H), 3.94 (s, 3H), 1.76 (d,  $J = 7.2$  Hz, 3H); <sup>13</sup>C NMR (101 MHz, CDCl<sub>3</sub>) δ 157.3, 146.5, 141.5, 133.1, 129.2, 128.9, 128.4, 127.8, 127.4, 126.9, 126.1, 125.2, 118.7, 105.6, 55.3, 44.7, 21.9; FTIR (NaCl/thin film) 3026, 2965, 2935, 2871, 1605, 1489, 1451, 1266, 1166, 1034, 851 cm<sup>-1</sup>; HRMS (EI+)  $[M]^+$  calculated for C<sub>19</sub>H<sub>18</sub>O: 262.1358, found: 262.1353. The spectral data for this compound matches that reported in the literature.<sup>8</sup>

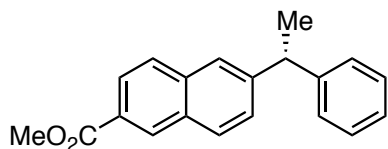

**(R)-Methyl 6-(1-phenylethyl)-2-naphthoate (20).**

Diarylethane **20** was prepared via the General Procedure using pivalate **1f** (prepared in 98% ee). The crude material was purified by silica gel chromatography (5–6% Et<sub>2</sub>O/hexanes) to give compound **20** (run 1: 49.2 mg, 85%; run 2: 47.4 mg, 82%) as viscous colorless oil. The enantiomeric excess was determined to be 94% ee (run 1: 93% ee; run 2: 94% ee) by chiral HPLC analysis (CHIRALPAK 1B, 1.0 mL/min, 2.0% *i*-PrOH/hexane, λ=254 nm);

<sup>8</sup> Gayral, M.; Brown, J. M. *Synlett*. **2007**, *18*, 2823.

$t_{\text{R}}(\text{minor})=6.75$  min,  $t_{\text{R}}(\text{major})=7.40$  min.  $[\alpha]_{\text{D}}^{24} = -31.8^{\circ}$  (c 1.92,  $\text{CHCl}_3$ ):  $^1\text{H}$  NMR (600 MHz,  $\text{CDCl}_3$ )  $\delta$  8.55 (s, 1H), 8.04 (dd,  $J = 8.6, 1.7$  Hz, 1H), 7.84 (dd,  $J = 8.5, 5.4$  Hz, 2H), 7.73 (s, 1H), 7.38 (dd,  $J = 8.5, 1.8$  Hz, 1H), 7.33 – 7.24 (m, 4H), 7.23 – 7.18 (m, 1H), 4.33 (q,  $J = 7.2$  Hz, 1H), 3.97 (s, 3H), 1.74 (d,  $J = 7.2$  Hz, 3H);  $^{13}\text{C}$  NMR (151 MHz,  $\text{CDCl}_3$ )  $\delta$  167.4, 146.6, 145.7, 135.7, 131.1, 130.8, 129.4, 128.5, 128.0, 127.8, 127.7, 126.9, 126.3, 125.4, 125.2, 52.2, 45.0, 21.7; FTIR (NaCl/thin film) 2966, 2929, 1719, 1632, 1494, 1437, 1289, 1237, 1201, 1097, 912  $\text{cm}^{-1}$ ; HRMS (CI+)  $[\text{M}+\text{H}]^+$  calculated for  $\text{C}_{15}\text{H}_{19}\text{N}_2\text{O}_4$ : 291.1385, found: 291.1387.

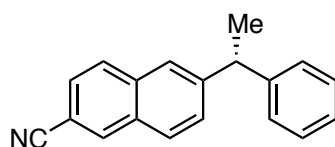

**(R)-6-(1-Phenylethyl)-2-naphthonitrile (21).** Diarylethane

**21** was prepared via the General Procedure using pivalate **1g** (prepared in 95% ee). The crude material was purified by silica gel chromatography (5–10% EtOAc/hexanes) to give compound **21** (run 1: 23.6 mg, 46%; run 2: 22.1 mg, 43%) as viscous colorless oil. The enantiomeric excess was determined to be 90% ee (run 1: 89% ee; run 2: 89% ee) by chiral HPLC analysis (CHIRALPAK 1A, 1.0 mL/min, 0.5% *i*-PrOH/hexane,  $\lambda=254$  nm);  $t_{\text{R}}(\text{minor})=34.2$  min,  $t_{\text{R}}(\text{major})=37.2$  min.  $[\alpha]_{\text{D}}^{24} = -75.0^{\circ}$  (c 0.40,  $\text{CHCl}_3$ ):  $^1\text{H}$  NMR (600 MHz,  $\text{CDCl}_3$ )  $\delta$  8.17 (s, 1H), 7.86 (d,  $J = 8.5$  Hz, 1H), 7.79 (d,  $J = 8.5$  Hz, 1H), 7.73 (s, 1H), 7.58 (dd,  $J = 8.5, 1.6$  Hz, 1H), 7.44 (dd,  $J = 8.6, 1.7$  Hz, 1H), 7.33 – 7.28 (m, 2H), 7.25 – 7.20 (m, 3H), 4.34 (q,  $J = 7.2$  Hz, 1H), 1.74 (d,  $J = 7.2$  Hz, 3H);  $^{13}\text{C}$  NMR (151 MHz,  $\text{CDCl}_3$ )  $\delta$  147.6, 145.3, 134.9, 133.8, 131.0, 129.0, 128.7, 128.6, 128.5, 127.7, 126.6, 126.5, 125.5, 119.4, 108.8, 45.0, 21.6; FTIR (NaCl/thin film) 3025, 2967, 2929, 2226, 1629, 1600, 1493, 1451, 1377, 1158, 894  $\text{cm}^{-1}$ ; HRMS (CI+)  $[\text{M}+\text{H}]^+$  calculated for  $\text{C}_{16}\text{H}_{18}\text{O}_3$ : 258.1283, found: 258.1277.

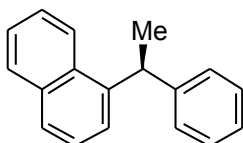

**(S)-1-(1-phenylethyl)naphthalene (22).** Diarylethane **22** was prepared via the General Procedure using pivalate **1h** (prepared in

86% ee). The crude material was purified by silica gel chromatography (3% Et<sub>2</sub>O/hexanes) to give compound **22** (run 1: 34.3 mg, 74%; run 2: 32.9 mg, 71%) as a colorless oil. The enantiomeric excess was determined to be 73% ee (run 1: 73% ee; run 2: 72% ee) by chiral HPLC analysis (CHIRALPAK 1B, 0.8 mL/min, 100% hexanes,  $\lambda=220$  nm);  $t_{\text{R}}(\text{major})=19.13$  min,  $t_{\text{R}}(\text{minor})=26.13$  min.  $[\alpha]_{\text{D}}^{24} = -23.3^{\circ}$  (c 0.60, CHCl<sub>3</sub>): <sup>1</sup>H NMR (400 MHz, CDCl<sub>3</sub>)  $\delta$  7.99 – 7.94 (m, 1H), 7.78 – 7.75 (m, 1H), 7.66 (dd,  $J = 7.8, 1.3$  Hz, 1H), 7.41 – 7.31 (m, 4H), 7.20 – 7.14 (m, 4H), 7.10 – 7.06 (m, 1H), 4.85 (q,  $J = 7.1$  Hz, 1H), 1.69 (d,  $J = 7.1$  Hz, 3H); <sup>13</sup>C NMR (151 MHz, CDCl<sub>3</sub>)  $\delta$  146.7, 141.6, 134.0, 131.7, 128.8, 128.4, 127.6, 127.0, 126.0, 125.9, 125.5, 125.3, 124.4, 124.0, 40.6, 22.6; FTIR (NaCl/thin film) 3058, 2966, 2929, 2872, 1597, 1508, 1493, 1449, 1396, 1372, 1026, 800 cm<sup>-1</sup>; HRMS (EI+) [M]<sup>+</sup> calculated for C<sub>18</sub>H<sub>16</sub>: 232.1252, found: 232.1255. The spectral data for this compound matches that reported in the literature.<sup>9</sup>

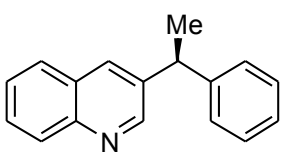

(*S*)-3-(1-Phenylethyl)quinoline (**23**). Diarylethane **23** was prepared via the General Procedure using pivalate **1i** (prepared in 82% ee). The crude material was purified by silica gel

chromatography (20% EtOAc/hexanes) to give compound **23** (run 1: 43.2 mg, 93%; run 2: 44.3 mg, 94%) as pale yellow oil. The enantiomeric excess was determined to be 58% ee (run 1: 58% ee; run 2: 57% ee) by chiral HPLC analysis (CHIRALPAK 1C, 1.0 mL/min, 3.0% *i*-PrOH/hexane,  $\lambda=210$  nm);  $t_{\text{R}}(\text{minor})=14.95$  min,  $t_{\text{R}}(\text{major})=16.50$  min.  $[\alpha]_{\text{D}}^{24} = +12.1^{\circ}$  (c 0.98, CHCl<sub>3</sub>): <sup>1</sup>H NMR (600 MHz, CDCl<sub>3</sub>)  $\delta$  8.80 (d,  $J = 2.3$  Hz, 1H), 8.07 (d,  $J = 8.5$  Hz, 1H), 7.94 (d,  $J = 2.3$  Hz, 1H), 7.77 (dd,  $J = 8.1, 1.6$  Hz, 1H), 7.69 – 7.63 (m, 1H), 7.56 – 7.47 (m, 1H), 7.36 – 7.29 (m, 2H), 7.29 – 7.20 (m, 3H), 4.37 (q,  $J =$

<sup>9</sup> (a) Mazuela, J.; Verendel, J. J.; Coll, M.; Schaffner, B.; Borner, A.; Anderson, P. G.; Pamies, O.; Dieguez, M. *J. Am. Chem. Soc.* **2009**, *131*, 12344. (b) Gomez, E. D.; Albert, D.; Mattiza, J.; Duddeck, H.; Chojnowski, J.; Cypryk, M. *Tetrahedron Asym.* **2006**, *17*, 1743.

7.2 Hz, 1H), 1.77 (d,  $J = 7.2$  Hz, 3H);  $^{13}\text{C}$  NMR (151 MHz,  $\text{CDCl}_3$ )  $\delta$  151.8, 146.8, 144.9, 138.9, 133.0, 129.1, 128.8, 128.7, 128.1, 127.7, 127.6, 126.6, 126.5, 42.6, 21.6; FTIR (NaCl/thin film) 3060, 3026, 2967, 2930, 2873, 1602, 1570, 1494, 1380, 1333, 1125, 1028, 961  $\text{cm}^{-1}$ ; HRMS (EI+)  $[\text{M}]^+$  calculated for  $\text{C}_{17}\text{H}_{15}\text{N}$ : 233.1204, found: 233.1198.

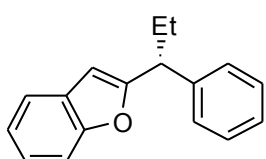

**(R)-2-(1-Phenylpropyl)benzofuran (24).** Diarylpropane **24** was prepared via the General Procedure using pivalate **1j** (prepared in 82% ee) except that 1.2 equiv of boroxine was used and the reaction mixture was heated at 32 °C for 24 h. The crude material was purified by silica gel chromatography (4%  $\text{Et}_2\text{O}$ /hexanes) to give compound **24** (run 1: 24.0 mg, 51%; run 2: 22.2 mg, 47%) as a colorless oil. The enantiomeric excess was determined to be 72% ee (run 1: 72% ee; run 2: 72% ee) by chiral HPLC analysis (CHIRALPAK 1B, 1.0 mL/min, 0.2% *i*-PrOH/hexane,  $\lambda=254$  nm);  $t_{\text{R}}$ (major)=37.28 min,  $t_{\text{R}}$ (minor)=34.31 min.  $[\alpha]_{\text{D}}^{24} = -38.1^\circ$  (c 0.80,  $\text{CHCl}_3$ ):  $^1\text{H}$  NMR (400 MHz,  $\text{CDCl}_3$ )  $\delta$  7.42 – 7.40 (m, 1H), 7.33 – 7.30 (m, 1H), 7.26 – 7.21 (m, 4H), 7.18 – 7.14 (m, 1H), 7.14 – 7.07 (m, 2H), 6.38 (s, 1H), 3.88 (t,  $J = 7.7$  Hz, 1H), 2.24 – 2.14 (m, 1H), 1.99 – 1.88 (m, 1H), 0.88 (t,  $J = 7.4$  Hz, 3H);  $^{13}\text{C}$  NMR (101 MHz,  $\text{CDCl}_3$ )  $\delta$  161.2, 154.8, 141.9, 128.7, 128.5, 128.0, 126.7, 123.3, 122.4, 120.4, 110.9, 102.4, 47.6, 27.6, 12.4; HRMS (EI+)  $[\text{M}]^+$  calculated for  $\text{C}_{17}\text{H}_{16}\text{O}$ : 236.1201, found: 236.1195. The spectral data for this compound matches that reported in the literature.<sup>10</sup>

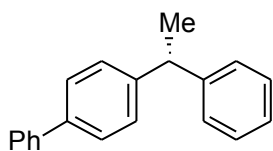

**(S)-4-(1-Phenylethyl)biphenyl (25).** Diarylethane **25** was prepared via the General Procedure using pivalate **1k** (prepared in 93% ee) except that 10 mol %  $\text{Ni}(\text{cod})_2$  and 1.0 equiv of boroxine were used and the reaction mixture was heated at 100 °C for 24 h. The crude material was purified by silica gel chromatography (100% petroleum ether) to give

<sup>10</sup> DeLuca, L.; Nieddu, G.; Giacomelli, G. *J. Org. Chem.* **2007**, *72*, 3955.



compound **25** (run 1: 17.0 mg, 33%; run 2: 17.2 mg, 33%) as a white solid (mp 37–41 °C). The enantiomeric excess was determined to be 84% ee (run 1: 84% ee; run 2: 84% ee) by chiral HPLC analysis (CHIRALPAK 1B, 1.0 mL/min, 100% hexane,  $\lambda=254$  nm);  $t_R(\text{minor})=15.34$  min,  $t_R(\text{major})=24.22$  min.  $[\alpha]_D^{24} = -51.6^\circ$  (c 0.60,  $\text{CHCl}_3$ ):  $^1\text{H}$  NMR (600 MHz,  $\text{CDCl}_3$ )  $\delta$  7.63 – 7.57 (m, 2H), 7.57 – 7.52 (m, 2H), 7.47 – 7.43 (m, 2H), 7.38 – 7.29 (m, 7H), 7.25 – 7.12 (m, 1H), 4.23 (q,  $J = 7.3$  Hz, 1H), 1.71 (d,  $J = 7.3$  Hz, 3H);  $^{13}\text{C}$  NMR (151 MHz,  $\text{CDCl}_3$ )  $\delta$  146.3, 145.5, 141.0, 139.0, 128.7, 128.4, 128.0, 127.6, 127.11, 127.05, 127.0, 126.1, 44.5, 21.9. The spectral data for this compound matches that reported in the literature.<sup>3</sup>

## Preparation of Benzyl Pivalates

### General Procedure for the Preparation of Benzyl Pivalates: Preparation of (*S*)-1-(Naphthalen-2-yl)ethyl Pivalate (**1a**)

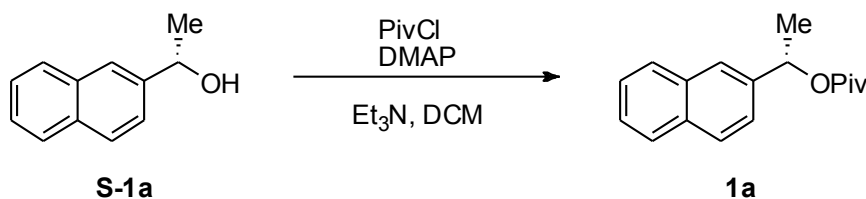

(*S*)-1-(Naphthalen-2-yl)ethanol (**S-1a**, 1.17 g, 6.8 mmol, 1.0 equiv) and DMAP (83 mg, 0.68 mmol, 0.10 equiv) were dissolved in  $\text{CH}_2\text{Cl}_2$  (10 mL, 0.68 M).  $\text{Et}_3\text{N}$  (1.94 mL, 1.35 mmol, 2.0 equiv) and pivaloyl chloride (1.02 mL, 8.15 mmol, 1.2 equiv) were then added. The reaction mixture was then stirred for 12 h at room temperature, before  $\text{H}_2\text{O}$  (20 mL) was added. The organic layer was extracted with  $\text{CH}_2\text{Cl}_2$  (2 x 20 mL). The combined organic layers were washed with 10% aq. KOH (20 mL), dried ( $\text{MgSO}_4$ ), filtered and concentrated. The resulting residue was purified by silica gel chromatography (5%  $\text{Et}_2\text{O}$ /hexanes) to give compound **1a** (1.58 g, 91%) as a white solid. The enantiomeric excess was determined to be >99% ee by chiral HPLC analysis

(CHIRALPAK IA, 0.6 mL/min, 1.0% *i*-PrOH/hexane,  $\lambda=254$  nm);  $t_R(\text{minor})=8.23$  min,  $t_R(\text{major})=10.31$  min.  $[\alpha]_D^{24} = -82.1^\circ$  (c 0.80,  $\text{CHCl}_3$ );  $^1\text{H NMR}$  (600 MHz,  $\text{CDCl}_3$ )  $\delta$  7.85 – 7.81 (m, 3H), 7.80 – 7.77 (m, 1H), 7.50 – 7.45 (m, 3H), 6.02 (q,  $J = 6.6$  Hz, 1H), 1.60 (d,  $J = 6.6$  Hz, 3H), 1.23 (s, 9H);  $^{13}\text{C NMR}$  (151 MHz,  $\text{CDCl}_3$ )  $\delta$  177.7, 139.5, 133.2, 132.9, 128.3, 128.0, 127.7, 126.2, 126.0, 124.7, 124.0, 72.1, 38.8, 27.2, 22.3; HRMS (EI+)  $[\text{M}]^+$  calculated for  $\text{C}_{17}\text{H}_{20}\text{O}_2$ : 256.1463, found: 256.1469. The spectral data for this compound matches that reported in the literature for the racemic compound.<sup>11</sup>

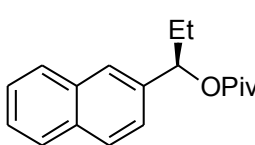

**(R)-1-(Naphthalen-2-yl)propyl pivalate (1b).** Prepared

according to the General Procedure on a 4.03 mmol scale to give **1b** (900 mg, 83%) as a colorless oil. The enantiomeric excess was determined to be >99% ee by chiral HPLC analysis (CHIRALPAK IA, 0.6 mL/min, 1.0% *i*-PrOH/hexane,  $\lambda=254$  nm);  $t_R(\text{major})=8.26$  min,  $t_R(\text{minor})=10.45$  min.  $[\alpha]_D^{24} = +160.9^\circ$  (c 4.20,  $\text{CHCl}_3$ );  $^1\text{H NMR}$  (600 MHz,  $\text{CDCl}_3$ )  $\delta$  7.88 – 7.75 (m, 4H), 7.54 – 7.44 (m, 3H), 5.83 (t,  $J = 7.0$  Hz, 1H), 2.07 – 1.87 (m, 2H), 1.27 (s, 9H), 0.95 (t,  $J = 7.2$  Hz, 3H);  $^{13}\text{C NMR}$  (151 MHz,  $\text{CDCl}_3$ )  $\delta$  177.7, 138.4, 133.2, 133.0, 128.2, 128.0, 127.7, 126.1, 125.9, 125.4, 124.2, 38.9, 29.5, 27.2, 26.5, 10.0; FTIR (NaCl/thin film) 3057, 2971, 2934, 2875, 1728, 1479, 1396, 1153, 817  $\text{cm}^{-1}$ ; HRMS (EI+)  $[\text{M}]^+$  calculated for  $\text{C}_{18}\text{H}_{22}\text{O}_2$ : 270.1620, found: 270.1626.

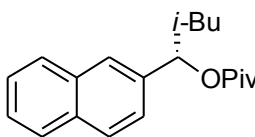

**(S)-3-Methyl-1-(naphthalen-2-yl)butyl pivalate (1c).** Prepared

according to the General Procedure on a 1.17 mmol scale to give **1c** (302 mg, 87%) as a colorless oil. The enantiomeric excess was determined to be 93% ee by chiral HPLC analysis (CHIRALPAK 1A, 0.8 mL/min, 1.0% *i*-PrOH/hexane,  $\lambda=254$  nm);  $t_R(\text{major})=8.22$  min,  $t_R(\text{minor})=10.31$  min.  $[\alpha]_D^{24} = -77.8^\circ$  (c 0.84,  $\text{CHCl}_3$ );  $^1\text{H NMR}$  (600 MHz,  $\text{CDCl}_3$ )  $\delta$  7.84 – 7.79 (m, 3H), 7.78 – 7.75 (m, 1H),

<sup>11</sup> Katsumata, H.; Yamada, S. *J. Org. Chem.* **2007**, *72*, 3955.

7.50 – 7.43 (m, 3H), 5.93 (m, 1H), 1.95 (dd,  $J = 8.9, 7.8$  Hz, 1H), 1.68 – 1.61 (m, 2H), 1.21 (s, 9H), 0.98 (d,  $J = 6.6$  Hz, 3H), 0.95 (d,  $J = 6.0$  Hz, 3H);  $^{13}\text{C}$  NMR (151 MHz,  $\text{CDCl}_3$ )  $\delta$  177.7, 138.9, 133.2, 132.9, 128.3, 128.0, 127.7, 126.1, 125.9, 125.4, 124.2, 74.4, 45.7, 38.2, 27.1, 24.8, 22.9, 22.3; FTIR (NaCl/thin film) 2958, 2360, 1728, 1652, 1558, 1506, 1457, 1282, 1164  $\text{cm}^{-1}$ ; HRMS (EI+)  $[\text{M}]^+$  calculated for  $\text{C}_{20}\text{H}_{26}\text{O}_2$ : 298.1933, found: 298.1938.

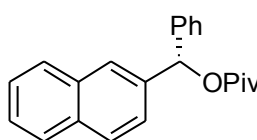

**(S)-naphthalen-2-yl(phenyl)methyl pivalate (1d).** Prepared

according to the General Procedure on a 6.40 mmol scale to give **1d** (1.18 g, 88%) as a colorless oil. The enantiomeric excess was determined to be >99% ee by chiral HPLC analysis (CHIRALPAK 1B, 0.8 mL/min, 1.0% *i*-PrOH/hexane,  $\lambda=254$  nm);  $t_{\text{R}}(\text{major})=7.06$  min,  $t_{\text{R}}(\text{minor})=6.43$  min.  $[\alpha]_{\text{D}}^{24} = -46.2^\circ$  (c 0.80,  $\text{CHCl}_3$ ):  $^1\text{H}$  NMR (600 MHz,  $\text{CDCl}_3$ )  $\delta$  7.87 – 7.80 (m, 4H), 7.53 – 7.48 (m, 2H), 7.45 (dd,  $J = 8.6, 1.7$  Hz, 1H), 7.43 – 7.34 (m, 4H), 7.33 – 7.30 (m, 1H), 7.02 (s, 1H), 1.30 (s, 9H);  $^{13}\text{C}$  NMR (151 MHz,  $\text{CDCl}_3$ )  $\delta$  177.3, 140.4, 137.9, 133.1, 132.9, 128.5, 128.4, 128.1, 127.8, 127.7, 126.9, 126.3, 126.2, 126.0, 124.9, 77.2, 38.9, 27.2; FTIR (NaCl/thin film) 2971, 1727, 1478, 1278, 1147, 1123, 1031, 818  $\text{cm}^{-1}$ ; HRMS (EI+)  $[\text{M}]^+$  calculated for  $\text{C}_{22}\text{H}_{22}\text{O}_2$ : 318.1620, found: 318.1617.

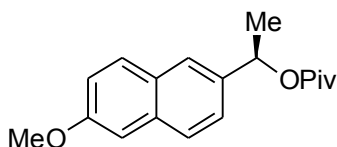

**(R)-1-(6-Methoxynaphthalen-2-yl)ethyl pivalate (1e).**

Prepared according to the General Procedure on a 1.89 mmol scale to give **1e** (460 mg, 85%) as a white solid (mp 78–82°C). The enantiomeric excess was determined to be >99% ee by chiral HPLC analysis (CHIRALPAK IA, 0.8 mL/min, 1.0% *i*-PrOH/hexane,  $\lambda=254$  nm);  $t_{\text{R}}(\text{major})=6.88$  min,  $t_{\text{R}}(\text{minor})=6.02$  min.  $[\alpha]_{\text{D}}^{24} = +81.2^\circ$  (c 0.80,  $\text{CHCl}_3$ ):  $^1\text{H}$  NMR (600 MHz,  $\text{CDCl}_3$ )  $\delta$  7.75 – 7.69 (m, 3H), 7.43 (dd,  $J = 8.5, 1.7$  Hz, 1H), 7.17 – 7.11 (m, 2H), 5.99 (q,  $J = 6.6$  Hz, 1H), 3.92 (s, 3H), 1.59 (d,  $J = 6.6$  Hz, 3H), 1.22 (s, 9H);  $^{13}\text{C}$  NMR

(151 MHz, CDCl<sub>3</sub>)  $\delta$  177.7, 157.8, 137.2, 134.1, 129.5, 128.6, 127.1, 124.7, 124.6, 118.9, 105.7, 72.1, 55.3, 38.8, 27.2, 22.2; FTIR (NaCl/thin film) 2979, 1724, 1608, 1506, 1487, 1391, 1284, 1237, 1166, 1031, 859 cm<sup>-1</sup>; HRMS (EI+) [M]<sup>+</sup> calculated for C<sub>18</sub>H<sub>22</sub>O<sub>3</sub>: 286.1569, found: 286.1561.

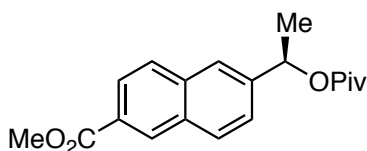

**(R)-Methyl 6-(1-(pivaloyloxy)ethyl)-2-naphthoate (1f).**

Prepared according to the General Procedure on a 1.84 mmol scale to give **1f** (470 mg, 81%) as a white solid (mp 85–88°C). The enantiomeric excess was determined to be 98% ee by chiral HPLC analysis (CHIRALPAK IA, 1.0 mL/min, 2.0% *i*-PrOH/hexane,  $\lambda$ =254 nm);  $t_R$ (major)=8.99 min,  $t_R$ (minor)=13.21 min.  $[\alpha]_D^{24} = +40.9^\circ$  (c 0.62, CHCl<sub>3</sub>): <sup>1</sup>H NMR (600 MHz, CDCl<sub>3</sub>)  $\delta$  8.59 (s, 1H), 8.06 (dd,  $J = 8.6, 1.7$  Hz, 1H), 7.94 (d,  $J = 8.5$  Hz, 1H), 7.87 (d,  $J = 8.6$  Hz, 1H), 7.82 (s, 1H), 7.52 (dd,  $J = 8.5, 1.7$  Hz, 1H), 6.01 (q,  $J = 6.6$  Hz, 1H), 3.98 (s, 3H), 1.60 (d,  $J = 6.6$  Hz, 3H), 1.24 (s, 9H); <sup>13</sup>C NMR (151 MHz, CDCl<sub>3</sub>)  $\delta$  177.7, 167.2, 142.2, 135.4, 132.0, 130.8, 129.8, 128.3, 127.5, 125.6, 124.7, 124.44, 71.9, 52.3, 38.8, 27.1, 22.3; FTIR (NaCl/thin film) 2977, 2872, 1724, 1635, 1480, 1436, 1281, 1156, 1097 cm<sup>-1</sup>; HRMS (CI+) [M+H]<sup>+</sup> calculated for C<sub>19</sub>H<sub>23</sub>O<sub>4</sub>: 315.1596, found: 315.1593.

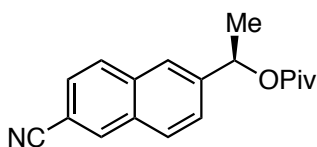

**(R)-1-(6-Cyanonaphthalen-2-yl)ethyl pivalate (1g).**

Prepared according to the General Procedure on a 0.89 mmol scale to give **1g** (170 mg, 67%) as a white solid (mp 74–76°C). The enantiomeric excess was determined to be 95% ee by chiral HPLC analysis (CHIRALPAK IA, 1.0 mL/min, 2.0% *i*-PrOH/hexane,  $\lambda$ =254 nm);  $t_R$ (major)=9.71 min,  $t_R$ (minor)=14.42 min.  $[\alpha]_D^{24} = +78.6^\circ$  (c 0.90, CHCl<sub>3</sub>): <sup>1</sup>H NMR (600 MHz, CDCl<sub>3</sub>)  $\delta$  8.22 (s, 1H), 7.91 (d,  $J = 4.0$  Hz, 1H), 7.89 (d,  $J = 4.1$  Hz, 1H), 7.83 (s, 1H), 7.63 – 7.57 (m, 2H), 6.00 (q,  $J = 6.6$  Hz, 1H), 1.60 (d,  $J = 6.6$  Hz, 3H), 1.23 (s, 9H); <sup>13</sup>C NMR (151 MHz, CDCl<sub>3</sub>)  $\delta$  177.6, 143.1, 134.6, 133.9, 131.7, 129.3, 128.9, 126.8, 125.7, 124.7,

119.2, 109.4, 71.7, 38.8, 27.1, 22.3; FTIR (NaCl/thin film) 3059, 2977, 2227, 1727, 1634, 1470, 1281, 1157, 1133, 1064  $\text{cm}^{-1}$ ; HRMS (CI+)  $[\text{M}+\text{H}]^+$  calculated for  $\text{C}_{18}\text{H}_{20}\text{NO}_2$ : 282.1494, found: 282.1491.

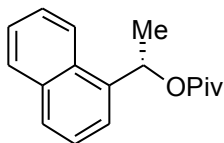

**(S)-1-(Naphthalene-1-yl)ethyl pivalate (1h).** Prepared according to the General Procedure on a 2.33 mmol scale to give **1h** (580 mg, 97%) as a colorless oil. The enantiomeric excess was determined to be 86% ee by chiral HPLC analysis (CHIRALPAK IA, 0.6 mL/min, 1.0% *i*-PrOH/hexane,  $\lambda=254$  nm);  $t_{\text{R}}$ (major)=9.52 min,  $t_{\text{R}}$ (minor)=8.00 min.  $[\alpha]_{\text{D}}^{24} = -39.2^\circ$  (c 3.80,  $\text{CHCl}_3$ );  $^1\text{H}$  NMR (600 MHz,  $\text{CDCl}_3$ )  $\delta$  8.08 (d,  $J = 8.6$  Hz, 1H), 7.87 (d,  $J = 8.3$  Hz, 1H), 7.79 (d,  $J = 8.2$  Hz, 1H), 7.59 (d,  $J = 7.0$  Hz, 1H), 7.55 – 7.46 (m, 3H), 6.61 (q,  $J = 6.6$  Hz, 1H), 1.68 (d,  $J = 6.6$  Hz, 3H), 1.24 (s, 9H);  $^{13}\text{C}$  NMR (151 MHz,  $\text{CDCl}_3$ )  $\delta$  177.7, 137.9, 133.8, 130.2, 128.9, 128.3, 126.2, 125.6, 125.4, 123.3, 123.0, 69.3, 38.9, 27.2, 21.8; FTIR (NaCl/thin film) 2977, 2932, 1728, 1479, 1458, 1397, 1368, 1283, 1157, 1068, 1045  $\text{cm}^{-1}$ ; HRMS (EI+)  $[\text{M}]^+$  calculated for  $\text{C}_{17}\text{H}_{20}\text{O}_2$ : 256.1463, found: 256.1467.

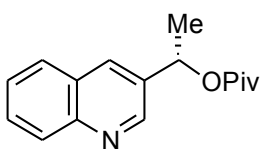

**(S)-1-(Quinolin-3-yl)ethyl pivalate (1i).** Prepared according to the General Procedure on a 1.60 mmol scale to give **1i** (132.7 mg, 30%) as pale yellow oil. The enantiomeric excess was determined to be 82% ee by chiral HPLC analysis (CHIRALPAK IA, 1.0 mL/min, 1.0% *i*-PrOH/hexane,  $\lambda=254$  nm);  $t_{\text{R}}$ (minor)=29.83 min,  $t_{\text{R}}$ (major)=33.26 min.  $[\alpha]_{\text{D}}^{24} = -96.8^\circ$  (c 0.96,  $\text{CHCl}_3$ );  $^1\text{H}$  NMR (600 MHz,  $\text{CDCl}_3$ )  $\delta$  8.96 (d,  $J = 2.2$  Hz, 1H), 8.13 (d,  $J = 8.5$  Hz, 1H), 8.11 (d,  $J = 2.1$  Hz, 1H), 7.85 (d,  $J = 8.1$  Hz, 1H), 7.63 – 7.53 (m, 1H), 6.09 (q,  $J = 6.6$  Hz, 1H), 1.68 (d,  $J = 6.7$  Hz, 3H), 1.26 (s, 9H);  $^{13}\text{C}$  NMR (151 MHz,  $\text{CDCl}_3$ )  $\delta$  177.6, 149.2, 147.8, 134.6, 132.9, 129.5, 129.3, 127.9, 127.7, 126.9, 70.1, 38.8, 27.1, 22.0; FTIR (NaCl/thin film) 2977, 2933, 2872, 1728, 1497, 1480, 1281, 1154, 1126, 1067, 909  $\text{cm}^{-1}$ ; HRMS (EI+)  $[\text{M}]^+$  calculated for  $\text{C}_{16}\text{H}_{19}\text{O}_2\text{N}$ : 257.1416, found: 257.1411.

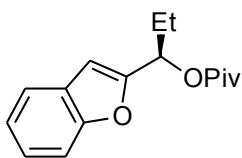

**(R)-1-(Benzofuran-2-yl)propyl pivalate (1j).** Prepared according to the General Procedure on a 1.66 mmol scale to give **1j** (320 mg, 74%) as a colorless oil. The enantiomeric excess was determined to be 82% ee by chiral HPLC analysis (CHIRALPAK IC, 1.0 mL/min, 0.3% *i*-PrOH/hexane,  $\lambda=254$  nm);  $t_R(\text{major})=9.25$  min,  $t_R(\text{minor})=8.49$  min.  $[\alpha]_D^{24} = +172.7^\circ$  (c 1.30, CHCl<sub>3</sub>); <sup>1</sup>H NMR (600 MHz, CDCl<sub>3</sub>)  $\delta$  7.58 – 7.54 (m, 1H), 7.51 – 7.46 (m, 1H), 7.33 – 7.21 (m, 2H), 6.67 (s, 1H), 5.91 (t,  $J = 12.0$  Hz, 1H), 2.13 – 2.03 (m, 2H), 1.25 (s, 9H), 0.99 (t,  $J = 7.4$  Hz, 3H); <sup>13</sup>C NMR (151 MHz, CDCl<sub>3</sub>)  $\delta$  177.7, 155.7, 154.8, 127.9, 124.2, 122.7, 121.1, 111.3, 104.2, 70.2, 38.9, 27.1, 26.0, 9.6; FTIR (NaCl/thin film) 2793, 2936, 2877, 1732, 1454, 1396, 1279, 1151, 1083, 1031, 950, 807 cm<sup>-1</sup>; HRMS (EI+) [M]<sup>+</sup> calculated for C<sub>16</sub>H<sub>20</sub>O<sub>3</sub>: 260.1413, found: 260.1411.

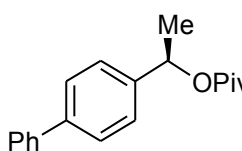

**(R)-1-([1,1'-Biphenyl]-4-yl)ethyl pivalate (1k).** Prepared according to the General Procedure on a 1.5 mmol scale to give **1k** (295 mg, 70%) as a white solid (mp 78–82°C). The enantiomeric excess was determined to be 93% ee by chiral HPLC analysis (CHIRALPAK IA, 1.0 mL/min, 0.3% *i*-PrOH/hexane,  $\lambda=254$  nm);  $t_R(\text{major})=9.02$  min,  $t_R(\text{minor})=10.74$  min.  $[\alpha]_D^{24} = +68.7^\circ$  (c 0.82, CHCl<sub>3</sub>); <sup>1</sup>H NMR (600 MHz, CDCl<sub>3</sub>)  $\delta$  7.64 – 7.57 (m, 4H), 7.50 – 7.42 (m, 4H), 7.41 – 7.35 (m, 1H), 5.92 (q,  $J = 6.6$  Hz, 1H), 1.58 (d,  $J = 6.6$  Hz, 3H), 1.26 (s, 9H); <sup>13</sup>C NMR (151 MHz, CDCl<sub>3</sub>)  $\delta$  177.7, 141.2, 140.8, 140.6, 128.8, 127.3, 127.2, 127.1, 126.2, 71.7, 38.8, 27.2, 22.4; FTIR (NaCl/thin film) 3029, 2981, 1720, 1486, 1367, 1284, 1176, 1071, 1009, 836 cm<sup>-1</sup>; HRMS (EI+) [M]<sup>+</sup> calculated for C<sub>19</sub>H<sub>22</sub>O<sub>2</sub>: 282.1620, found: 282.1629.

## Preparation of Benzyl Alcohols

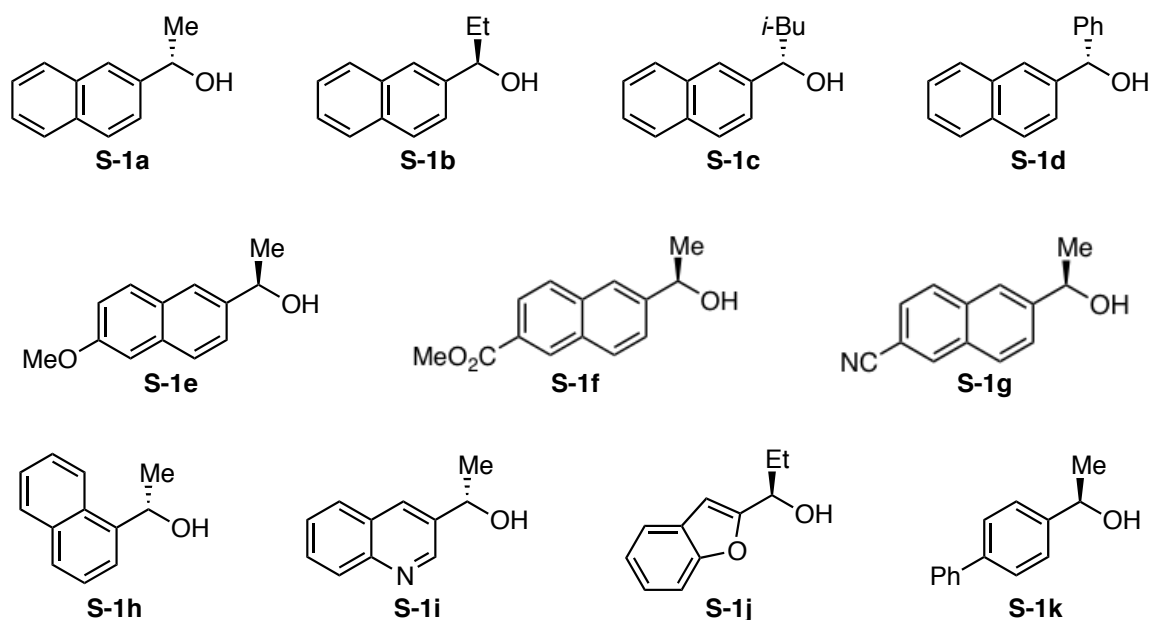

(*S*)-1-(Naphthalen-2-yl)ethanol (**S-1a**) was purchased from Sigma Aldrich. Alcohols **S-1b**,<sup>12</sup> **S-1d**,<sup>7</sup> and **S-1j**<sup>12</sup> were prepared according to literature procedures using asymmetric addition of diethyl zinc to the aldehydes. The enantiomeric excesses of crystalline compounds **S-1b** and **S-1d** were then increased via recrystallization from hexanes. Alcohols **S-1e**, **S-1f**, **S-1g**, and **S-1k** were prepared via Corey-Bakshi-Shibata reduction of ketones.<sup>13</sup> The enantiomeric excess of known alcohol **S-1e**<sup>13</sup> was then increased via trituration with 5% Et<sub>2</sub>O/hexanes. Alcohols **S-1c**, **S-1h**,<sup>14</sup> and **S-1i** were prepared by asymmetric transfer hydrogenation of ketones.<sup>14</sup> Because alcohols **S-1c**, **S-1f**, **S-1g**, **S-1i**,

<sup>12</sup> Taylor, B. L. H.; Swift, E. C.; Waetzig, J. D.; Jarvo, E. R. *J. Am. Chem. Soc.* **2011**, *133*, 389.

<sup>13</sup> Bakshi, R. K.; Shibata, S.; Chen, C.; Singh, V. K.; Corey, E. J. *J. Am. Chem. Soc.* **1987**, *109*, 7925.

<sup>14</sup> Wu, X.-F.; Li, X.-G.; Hems, W.; King, F.; Xiao, J.-L. *Org. Biomol. Chem.* **2004**, *2*, 1818.

and **S-1k** have not been prepared via these methods previously, we have included experimentals for our procedures below.

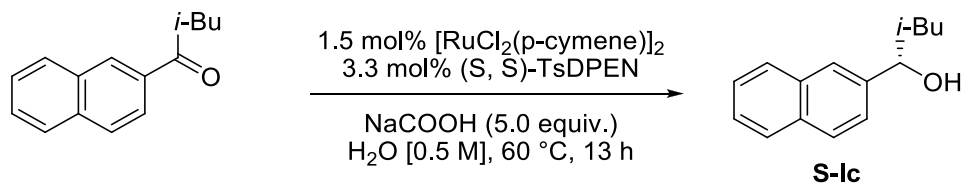

**(S)-3-Methyl-1-(naphthalene-2-yl)butan-1-ol (S-1c).** The following procedure is adapted from the literature.<sup>14</sup> In a  $\text{N}_2$ -atmosphere glovebox,  $[\text{RuCl}_2(p\text{-cymene})]_2$  (21.9 mg, 0.0358 mmol, 1.5 mol %) and  $(S,S)$ -TsDPEN (28.8 mg, 0.0787 mmol, 3.3 mol %) were weighed into a vial. The vial was then capped and removed from glovebox.  $\text{H}_2\text{O}$  (degassed by sparging with  $\text{N}_2$ , 6.0 mL) was added, and the resulting mixture was stirred at  $40^\circ\text{C}$  for 1 h. 3-Methyl-1-(naphthalene-2-yl)butan-1-one (387.0 mg, 2.39 mmol, 1.0 equiv) and NaCOOH (811.4 mg, 11.9 mmol, 5.0 equiv) were added. The vial was evacuated and refilled with  $\text{N}_2$  three times and then heated at  $60^\circ\text{C}$  for 13 h. The reaction mixture was diluted with  $\text{Et}_2\text{O}$  (10 mL) and filtered through silica gel, which was then rinsed with additional  $\text{Et}_2\text{O}$  (10 mL x 2). The combined organic layers were concentrated. The resulting residue was purified by silica gel chromatography (15%  $\text{Et}_2\text{O}$ /hexanes) and then recrystallized (hexanes) to give compound **S-1c** (238.3 mg, 61%, 93% ee) as a white solid. The spectral data for this compound matches that reported in literature.<sup>15</sup>

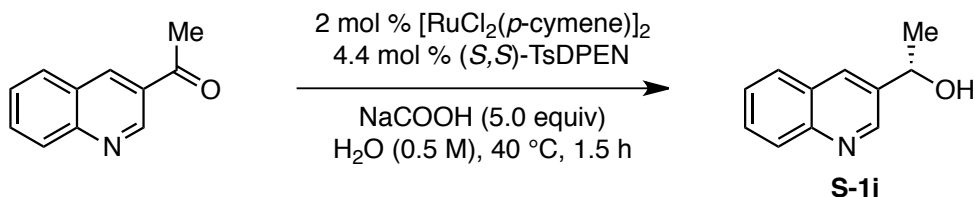

<sup>15</sup> Da, C.; Wang, J.; Yin, X.; Fan, X.; Liu, Y.; Yu, S. *Org. Lett.* **2009**, *24*, 5578.



**(S)-1-(Quinolin-3-yl)ethanol (S-1i).** The following procedure is adapted from the literature.<sup>14</sup> In a N<sub>2</sub>-atmosphere glovebox, [RuCl<sub>2</sub>(*p*-cymene)]<sub>2</sub> (3.58 mg, 0.0058 mmol, 2.0 mol %) and (*S,S*)-TsDPEN (4.71 mg, 0.0129 mmol, 4.4 mol %) were weighed into a vial. The vial was then capped and removed from glovebox. H<sub>2</sub>O (degassed by sparging with N<sub>2</sub>, 0.6 mL) was added, and the resulting mixture was stirred at 40 °C for 1 h. 3-Acetylquinoline (50.0 mg, 0.292 mmol, 1.0 equiv) and NaCOOH (99.3 mg, 1.46 mmol, 5.0 equiv) were added. The vial was evacuated and refilled with N<sub>2</sub> three times and then heated at 40 °C for 1.5 h. The reaction mixture was diluted with Et<sub>2</sub>O (1 mL) and filtered through silica gel, which was then rinsed with additional Et<sub>2</sub>O (1 mL x 2). The combined organic layers were concentrated. The resulting residue was purified by silica gel chromatography (50–90% EtOAc/hexanes) to give compound **S-1i** (45.7 mg, 90%, 85% ee) as a light brown oil. The spectral data for this compound matches to that reported in literature.<sup>16</sup>

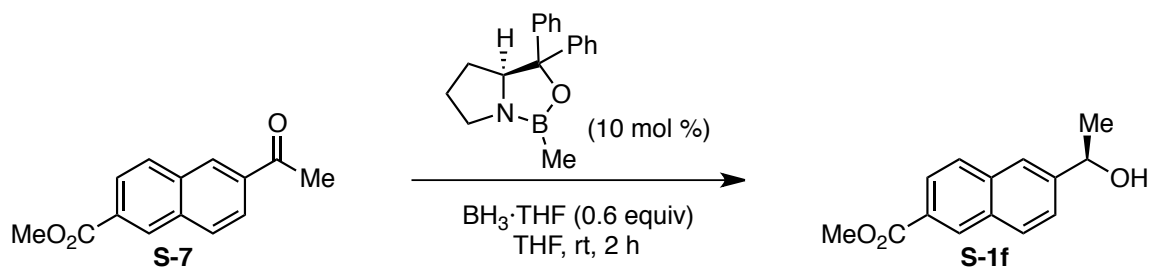

**(R)-Methyl 6-(1-hydroxyethyl)-2-naphthoate (S-1f).** The following procedure is adapted from the literature.<sup>13</sup> A solution of CBS catalyst (83.2 mg, 0.30 mmol, 10 mol %) and THF (5.0 mL) was slowly added to a solution of ketone **S-7** (685 mg, 3.0 mmol, 1.0 equiv), BH<sub>3</sub>·THF (1 M in THF, 1.8 mL, 1.8 mmol, 0.60 equiv), and THF (55 mL). After stirring at room temperature for 2 h, H<sub>2</sub>O (30 mL) was added. The mixture was extracted

<sup>16</sup> Legros, J.; Toffano, M.; Drayton, S. K.; Rivard, M.; Fiaud, J. *Tetrahedron Lett.* **1997**, 38, 1915.

with Et<sub>2</sub>O (30 mL x 3). The combined organic layers were then dried (MgSO<sub>4</sub>), filtered, concentrated. The resulting residue was purified by silica gel chromatography (40% EtOAc/hexanes) to give alcohol **S-1f** (460 mg, 67%) as a white solid (mp 74–77 °C): <sup>1</sup>H NMR (600 MHz, CDCl<sub>3</sub>) δ 8.58 (s, 1H), 8.05 (dd, *J* = 8.6, 1.7 Hz, 1H), 7.93 (d, *J* = 8.5 Hz, 1H), 7.87 (s, 1H), 7.85 (s, 1H), 7.56 (dd, *J* = 8.5, 1.7 Hz, 1H), 5.16 – 5.06 (m, 1H), 3.97 (s, 3H), 1.96 (d, *J* = 3.5 Hz, 1H), 1.58 (d, *J* = 6.5 Hz, 3H); <sup>13</sup>C NMR (151 MHz, CDCl<sub>3</sub>) δ 167.3, 145.8, 135.5, 131.9, 130.8, 129.8, 128.2, 127.3, 125.6, 124.7, 123.6, 70.4, 52.3, 25.3; FTIR (NaCl/thin film) 3279, 2974, 2887, 1715, 1632, 1437, 1290, 1202, 1130, 1073, 898 cm<sup>-1</sup>; HRMS (CI+) [M+H]<sup>+</sup> calculated for C<sub>14</sub>H<sub>15</sub>O<sub>3</sub>: 231.1021, found: 231.1019.

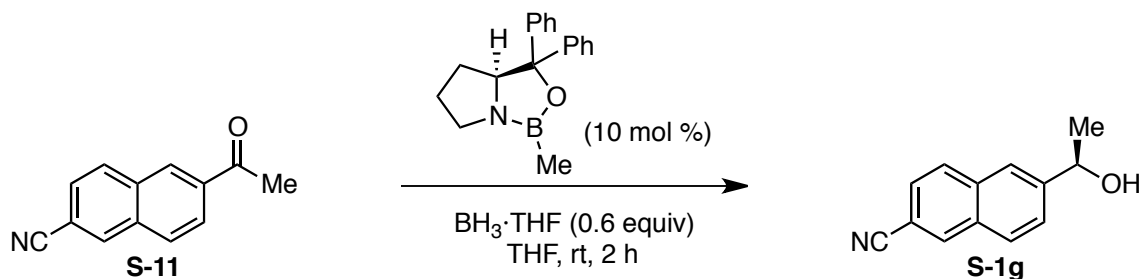

**(R)-6-(1-Hydroxyethyl)-2-naphthonitrile (S-1g)**. The following procedure is adapted from the literature.<sup>13</sup> A solution of CBS catalyst (30.7 mg, 0.11 mmol, 10 mol %) and THF (2.0 mL) was slowly added to a solution of ketone **S-11** (216.3 mg, 1.1 mmol, 1.0 equiv), BH<sub>3</sub>·THF (1 M in THF, 0.66 mL, 0.66 mmol, 0.60 equiv), and THF (20 mL). After stirring at room temperature for 2 h, H<sub>2</sub>O (20 mL) was added. The mixture was extracted with Et<sub>2</sub>O (15 mL x 3). The combined organic layers were then dried (MgSO<sub>4</sub>), filtered, concentrated. The resulting residue was purified by silica gel chromatography (60% EtOAc/hexanes) to give alcohol **S-1g** (202 mg, 93%) as a white solid (mp 75–77 °C): <sup>1</sup>H NMR (400 MHz, CDCl<sub>3</sub>) δ 8.18 (s, 1H), 7.93 – 7.88 (m, 3H), 7.67 – 7.60 (m, 2H), 5.09 (q, *J* = 6.5 Hz, 1H), 2.10 (s, 1H), 1.57 (d, *J* = 6.5 Hz, 3H); <sup>13</sup>C NMR (100 MHz,

CDCl<sub>3</sub>) δ 146.8, 134.7, 133.9, 131.7, 129.2, 128.8, 126.7, 125.8, 123.8, 119.3, 109.1, 70.2, 25.4; FTIR (NaCl/thin film) 3445, 2973, 2926, 2872, 2227, 1632, 1369, 1272, 1159, 1088, 895 cm<sup>-1</sup>; HRMS (CI+) [M+H]<sup>+</sup> calculated for C<sub>13</sub>H<sub>12</sub>NO: 198.0919, found: 198.0917.

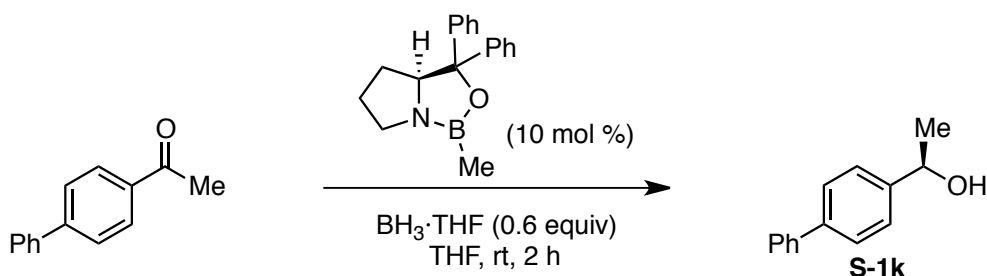

**(R)-1-(Biphenyl-4-yl)ethanol (S-1k)**. The following procedure is adapted from the literature.<sup>13</sup> A solution of CBS catalyst (97.0 mg, 0.35 mmol, 10 mol %) and THF (5.0 mL) was slowly added to a solution of 4-acetylbiphenyl (687.0 mg, 3.50 mmol, 1.0 equiv), BH<sub>3</sub>·THF (1 M in THF, 2.1 mL, 2.1 mmol, 0.60 equiv), and THF (70 mL). After stirring at room temperature for 2 h, H<sub>2</sub>O (50 mL) was added. The mixture was extracted with Et<sub>2</sub>O (30 mL x 3). The combined organic layers were then dried (MgSO<sub>4</sub>), filtered, concentrated. The resulting residue was purified by recrystallization (hexanes) to give compound **S-1k** (640.7 mg, 92%, 93% ee) as a white solid. The spectral data for this compound matches that reported in the literature for the racemic compound.<sup>17</sup>

<sup>17</sup> Inagaki, T.; Phong, L.; Furuta, A.; Ito, J.; Nishiyama, H. *Chem Eur. J.* **2010**, *16*, 3090.

## Preparation of Pivalate 11

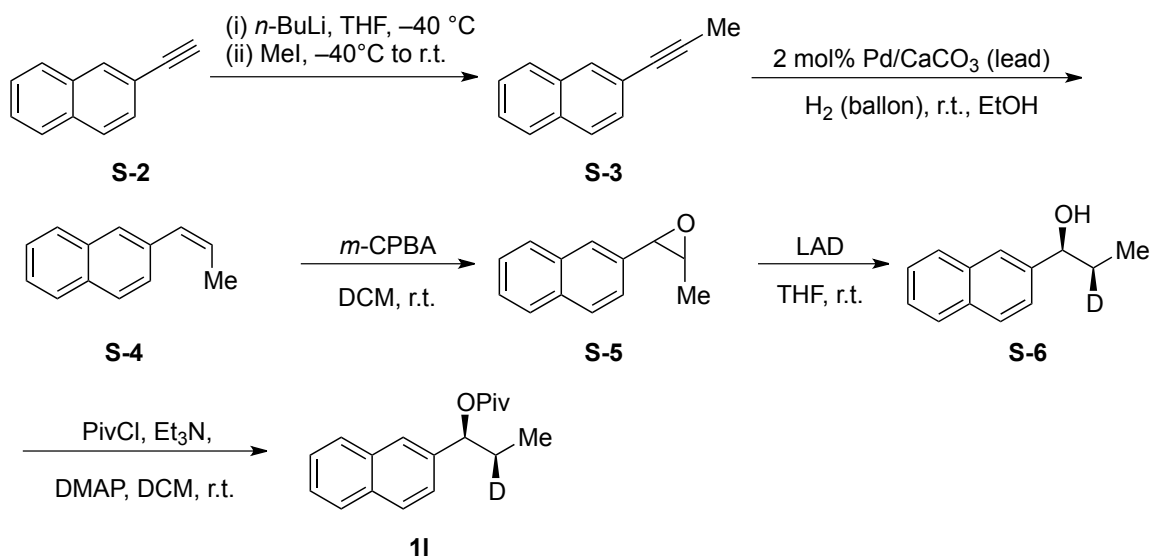

**2-(Prop-1-ynyl)naphthalene (S-3).** The following procedure is adapted from the literature.<sup>18</sup> A solution of terminal alkyne **S-2** (507.8 mg, 3.38 mmol, 1.0 equiv) and THF (20 mL) was cooled to -40 °C in a 50-mL round-bottomed flask. *n*-BuLi (2.5 M in Hexanes, 2.7 mL, 6.76 mmol, 2.0 equiv) was added. After stirring at -40 °C for 1 h, a solution of iodomethane (0.44 mL, 7.10 mmol, 2.1 equiv) and THF (2.5 mL) was added. The mixture was then stirred for 1 h at room temperature. Sat. aq. NH<sub>4</sub>Cl (2 mL) and then water (40 mL) was added, and the mixture was extracted with Et<sub>2</sub>O (30 mL x 3). The combined organic layers were then dried (MgSO<sub>4</sub>), filtered, and concentrated. The resulting residue was purified by silica gel chromatography (100% petroleum ether) to give compound **S-3** (457.0 mg, 81%) as a colorless oil. The spectral data for compound **S-3** matches that reported in literature.<sup>19</sup>

<sup>18</sup> Stuart, D. R.; Bertrand-Laperle, M.; Burgess, K. M. N.; Fagnou, K. *J. Am. Chem. Soc.* **2008**, *130*, 16474.

<sup>19</sup> An, D.-L.; Zhang, Z.-Y.; Orita, A.; Mineyama, H.; Otera, J. *Synlett* **2007**, *12*, 1909.

**(Z)-2-(Prop-1-enyl)naphthalene (S-4)**. The following procedure is adapted from the literature.<sup>20</sup> In a 25-mL flask, Pd/CaCO<sub>3</sub> (5%, poisoned with lead, 80.4 mg, 0.0378 mmol 2 mol %) and ethanol (5.0 mL) were combined. The flask was evacuated and refilled with H<sub>2</sub> (balloon) three times, then a solution of alkyne **S-3** (314.1 mg, 1.89 mmol, 1.0 equiv) and ethanol (4.5 mL) was added slowly. The reaction mixture was stirred at room temperature for 40 minutes. It was then filtered through Celite and concentrated. The resulting residue was purified by silica gel chromatography (100% petroleum ether) to give **S-4** (282.3 mg, 89%) as colorless oil. The ratio of *Z*:*E* olefins was 19:1, as determined by <sup>1</sup>H NMR analysis.<sup>21</sup> This mixture was directly used in next step.

**Cis-2-methyl-3-(naphtha-2-yl)oxirane (S-5)**. The following procedure is adapted from the epoxidation of (*E*)-2-(prop-1-enyl)naphthalene in literature.<sup>22</sup> In a 50-mL flask, olefin **S-4** (247.8 mg, 1.34 mmol, 1.0 equiv) and CH<sub>2</sub>Cl<sub>2</sub> (5.0 mL) were combined. A solution of *meta*-chloroperoxybenzoic acid (400.0 mg, 1.62 mmol, 1.2 equiv) and CH<sub>2</sub>Cl<sub>2</sub> (10 mL) was added. After stirring at 35 °C for 30 min, sat. Na<sub>2</sub>SO<sub>3</sub> (6 mL), water (10 mL) and then sat. NaCl were added. The organic layer was separated, dried (Na<sub>2</sub>SO<sub>4</sub>), filtered, concentrated. The resulting residue was purified by silica gel chromatography (5% Et<sub>2</sub>O/hexanes) to give compound **S-5** (182.9 mg, 74%) as a colorless oil. The <sup>1</sup>H NMR showed that the ratio of *cis*:*trans* was 17:1.<sup>23</sup> This mixture was directly used in next step.

---

<sup>20</sup> Brunet, J.-J.; Caubere, P. *J. Org. Chem.* **1984**, *49*, 4058.

<sup>21</sup> The assignment of olefins was done according to the reported spectral data, see: Dong, D.-J.; Li, Y.; Wang, J.-Q.; Tian, S.-K. *Chem. Comm.* **2011**, *47*, 2158.

<sup>22</sup> Kulasegaram, S.; Kulawiec, R. *J. Org. Chem.* **1997**, *62*, 6547.

<sup>23</sup> The assignment of epoxides was done according to the reported spectral data. For *cis*-2-methyl-3-(naphtha-2-yl)oxirane, see: Tian, H.-Q.; She, X.-G.; Shu, L.-H.; Yu, H.-W.; Shi, Y.-A. *J. Am. Soc. Chem.* **2000**, *122*, 11551. For *trans*-2-methyl-3-(naphtha-2-yl)oxirane, see reference 22.

**1-(Naphthalene-2-yl)-2-deuterio-propan-1-ol (S-6).** In a 10-mL flask, lithium aluminum deuteride (105 mg, 2.5 mmol, 2.5 equiv) and THF (2 mL) were combined and cooled to 0 °C. A solution of **S-5** (183.0 mg, 1.0 mmol, 1.0 equiv) and THF (8 mL) was slowly added via addition funnel. After the addition was complete, the reaction mixture was warmed to room temperature and stirred for 2 hours. The reaction was then quenched by the addition of 1 N aq. HCl (5 mL). The organic layer was washed with sat. NaCl, dried (MgSO<sub>4</sub>), filtered and concentrated. The resulting residue was purified by silica gel chromatography (17% Et<sub>2</sub>O/hexanes) to give compound **S-6** (80.0 mg, 73%) as a colorless oil: <sup>1</sup>H NMR (600 MHz, CDCl<sub>3</sub>) δ 7.89 – 7.84 (m, 3H), 7.81 (s, 1H), 7.54 – 7.47 (m, 3H), 4.80 (d, *J* = 5.8 Hz, 1H), 1.96 (s, 1H), 1.91 – 1.83 (m, 1H), 0.97 (d, *J* = 7.4 Hz, 3H); <sup>13</sup>C NMR (151 MHz, CDCl<sub>3</sub>) δ 141.9, 133.3, 133.0, 128.3, 127.9, 127.7, 126.1, 125.8, 124.7, 124.2, 76.1, 31.4 (t, *J* = 19.6 Hz), 10.0; FTIR (NaCl/thin film) 3357 (br), 3055, 2962, 2931, 2874, 1602, 1508, 1457, 1376, 1270, 1124, 1059, 1017, 857 cm<sup>-1</sup>; HRMS (EI+) [M]<sup>+</sup> calculated for C<sub>13</sub>H<sub>13</sub>OD: 187.1106, found: 187.1114.

**1-(Naphthalene-2-yl)-2-deuterio-propyl pivalate (11).** Prepared according to the General Procedure for pivalate synthesis (see above) on a 0.176 mmol scale to give **11** (38.2 mg, 80%) as a colorless oil: <sup>1</sup>H NMR (600 MHz, CDCl<sub>3</sub>) δ 7.77 – 7.72 (m, 3H), 7.68 (s, 1H), 7.43 – 7.35 (m, 3H), 5.72 (d, *J* = 6.0 Hz, 1H), 1.81 (p, *J* = 7.3 Hz, 1H), 1.16 (s, 9H), 0.85 (d, *J* = 7.4 Hz, 3H); <sup>13</sup>C NMR (151 MHz, CDCl<sub>3</sub>) δ 177.8, 138.4, 133.2, 133.0, 128.2, 128.0, 127.7, 126.1, 125.9, 125.4, 124.2, 77.2, 38.9, 29.2 (t, *J* = 16.5 Hz), 27.2, 9.9; FTIR (NaCl/thin film) 3057, 2971, 2934, 2874, 1728, 1479, 1459, 1283, 1154, 1125, 856 cm<sup>-1</sup>; HRMS (EI+) [M]<sup>+</sup> calculated for C<sub>18</sub>H<sub>21</sub>O<sub>2</sub>D: 271.1683, found: 271.1675.

## $\beta$ -Hydride Elimination Experiment

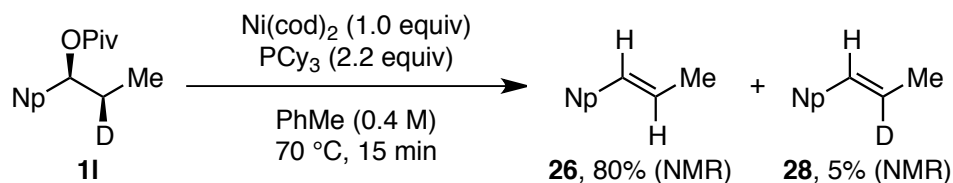

In a  $\text{N}_2$ -atmosphere glovebox,  $\text{Ni(cod)}_2$  (45.7 mg, 0.166 mmol, 1.0 equiv) and  $\text{PCy}_3$  (102.3 mg, 0.365 mmol, 2.2 equiv) were weighed into a 1-dram vial. Pivalate **11** (45.0 mg, 0.166 mmol, 1.0 equiv) was added, followed by toluene (0.41 mL, 0.4 M). The vial was capped with a Teflon-lined cap and removed from the glovebox. The mixture was heated for 15 minutes at  $70\text{ }^\circ\text{C}$ . The reaction mixture was then diluted with  $\text{Et}_2\text{O}$  (2.0 mL) and filtered through a plug of silica gel, which was rinsed with  $\text{Et}_2\text{O}$  (15 mL). The solution was concentrated. Then 1,3,5-trimethoxybenzene (27.9 mg, 0.166 mmol, 1.0 equiv) was added as an internal standard for  $^1\text{H}$  NMR analysis. Based on the  $^1\text{H}$  NMR spectrum, pivalate **11** underwent quantitative conversion to give products **26**<sup>21</sup> (80%) and **28**<sup>24</sup> (5%).

## Control Experiments for $\beta$ -Hydride Elimination Experiment

Although the cross coupling proceeds with low levels of chirality transfer using a  $\text{Ni/PCy}_3$  catalyst, we have determined that the starting material does not epimerize to a significant extent under the conditions used in the  $\beta$ -hydride elimination experiment.

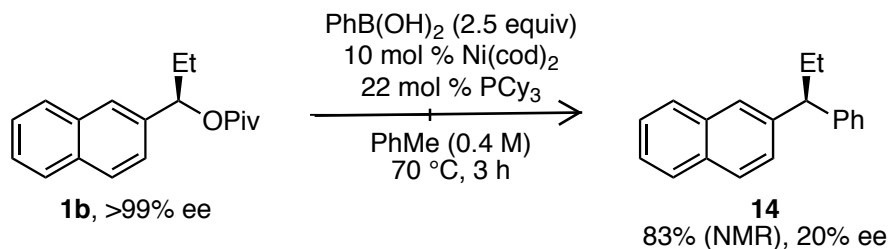

<sup>24</sup> Kulasegaram, S.; Kulawiec, R. J. *Tetrahedron* **1998**, *54*, 1361.

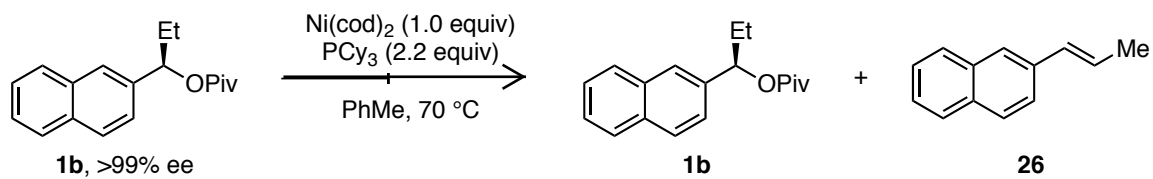

| entry | time (min) | yield of <b>1b</b> (%) <sup>a</sup> | ee of <b>1b</b> (%) <sup>b</sup> | yield of <b>26</b> (%) <sup>a</sup> |
|-------|------------|-------------------------------------|----------------------------------|-------------------------------------|
| 1     | 15         | 0                                   | n.d.                             | >95                                 |
| 2     | 1.5        | 19                                  | 95                               | 81                                  |

<sup>a</sup> Determined by <sup>1</sup>H NMR analysis using 1,3,5-trimethoxybenzene as an internal standard. <sup>b</sup> Determined by chiral HPLC analysis.



## Preparation of Ketones S-7 and S-11

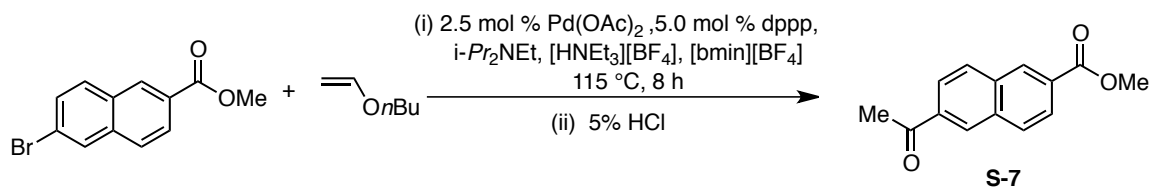

**Methyl 6-acetyl-2-naphthoate (S-7).** The following procedure is adapted from the literature.<sup>25</sup> An oven-dried, two-necked round-bottomed flask was charged with methyl 6-bromo-2-naphthoate (1.25 g, 4.72 mmol, 1.0 equiv), Pd(OAc)<sub>2</sub> (26.4 mg, 0.12 mmol, 2.5 mol %), dppp (97.0 mg, 0.24 mmol, 5 mol %), [HNEt<sub>3</sub>][BF<sub>4</sub>] (1.38 g, 7.06 mmol, 1.5 equiv) and [bmin][BF<sub>4</sub>] (10 mL). The flask was then evacuated and refilled with N<sub>2</sub> three times. 1-(Vinyl)oxybutane (1.27 mL, 9.43 mmol, 2.0 equiv) and then *i*-Pr<sub>2</sub>NEt (1.3 mL, 7.06 mmol, 1.5 equiv) were added via syringe. The reaction mixture heated at 115 °C. After 8 h, the mixture was cooled to room temperature. Aq. HCl (5%, 15 mL) was added, and the mixture was stirred at room temperature for 0.5 h. CH<sub>2</sub>Cl<sub>2</sub> (30 mL) was then added, and the layers were separated. The aqueous layer was then extracted with CH<sub>2</sub>Cl<sub>2</sub> (2 x 30 mL). The combined organic layers were washed with H<sub>2</sub>O until neutral, dried (Na<sub>2</sub>SO<sub>4</sub>), filtered, and concentrated. The crude material was purified by silica gel chromatography (12% EtOAc/hexanes) to give compound **S-7** (700.0 mg, 65%) as a white solid (mp 147–150 °C): <sup>1</sup>H NMR (600 MHz, CDCl<sub>3</sub>) δ 8.62 (s, 1H), 8.48 (s, 1H), 8.13 (dd, *J* = 8.6, 1.6 Hz, 1H), 8.08 (dd, *J* = 8.6, 1.7 Hz, 1H), 8.01 (dd, *J* = 8.6, 2.5 Hz, 2H), 4.00 (s, 3H), 2.74 (s, 3H); <sup>13</sup>C NMR (151 MHz, CDCl<sub>3</sub>) δ 197.8, 166.8, 136.3, 134.7, 134.6, 130.6, 129.9, 129.8, 129.7, 129.6, 126.2, 124.7, 52.4, 26.8; FTIR (NaCl/thin film) 3058, 2952, 1711, 1608, 1438, 1360, 1338, 1291, 1264, 1180, 1097, 956 cm<sup>-1</sup>; HRMS (CI+) [M+H]<sup>+</sup> calculated for C<sub>14</sub>H<sub>13</sub>O<sub>3</sub>: 229.0865, found: 229.0869.

<sup>25</sup> Mo, J.; Xiao, J.-L. *Angew. Chem. Int. Ed.* **2006**, *45*, 4152.

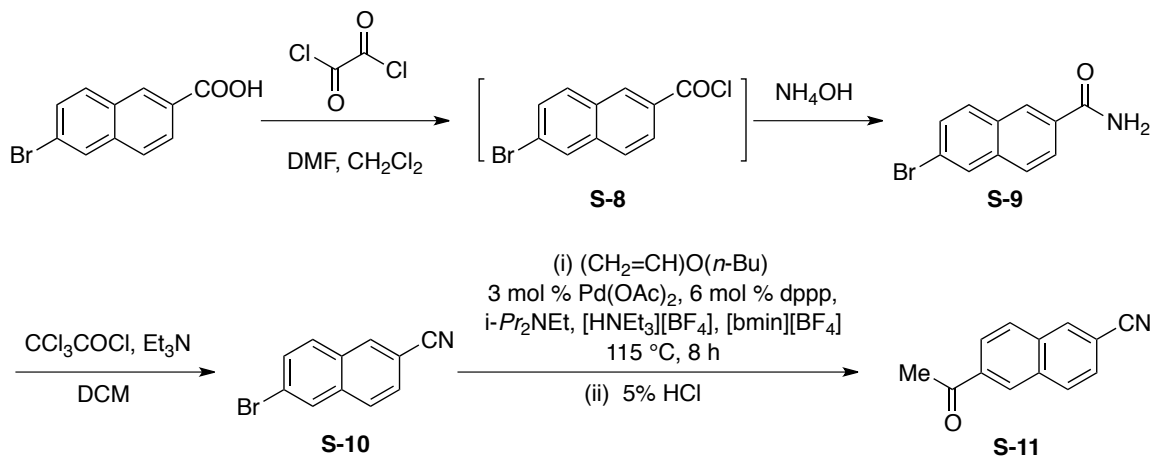

**6-Acetyl 2-naphthonitrile (S-11).** In a round-bottomed flask equipped with a nitrogen inlet and an oil bubbler to monitor gas flow, a solution of 6-bromo-2-naphthoic acid (4.0 g, 15.9 mmol, 1.0 equiv), DMF (0.25 mL, 3.18 mmol, 0.2 equiv) and  $\text{CH}_2\text{Cl}_2$  (40.0 mL) was cooled to  $0^\circ\text{C}$ . Oxalyl chloride (2.05 mL, 23.9 mmol, 1.5 equiv) was then added dropwise via syringe, and the immediate evolution of gas was observed by increased flow through the bubbler. The reaction mixture was stirred at  $0^\circ\text{C}$  until gas flow slowed and was then stirred at room temperature for 1 hour. The resulting solution of acid chloride **S-8** was used in the subsequent step without purification.

After the oil bubbler was removed, the solution of acid chloride **S-8** was cooled to  $0^\circ\text{C}$ . A solution of aq.  $\text{NH}_4\text{OH}$  (25%, 2.15 mL, 55.7 mmol, 3.5 equiv) was added dropwise via syringe. A precipitate immediately formed. The reaction mixture was then stirred at room temperature for 30 min.  $\text{H}_2\text{O}$  (40 mL) was added. The mixture was extracted with EtOAc (60 mL). The organic layer was washed with sat. NaCl (30 mL), dried ( $\text{MgSO}_4$ ), filtered, and concentrated to give amide **S-9** (2.5g, 63%) as a white solid:  $^1\text{H}$  NMR (600 MHz,  $\text{CDCl}_3$ )  $\delta$  8.35 – 8.28 (m, 1H), 8.06 (d,  $J = 1.9$  Hz, 1H), 7.89 (d,  $J = 1.7$  Hz, 1H), 7.87 (d,  $J = 1.8$  Hz, 1H), 7.85 – 7.78 (m, 1H), 7.63 (dd,  $J = 8.7, 2.0$  Hz, 1H),

6.20 (s, 1H), 5.72 (s, 1H);  $^{13}\text{C}$  NMR (151 MHz,  $\text{CDCl}_3$ )  $\delta$  168.8, 135.9, 131.0, 130.9, 130.6, 130.4, 129.9, 128.1, 127.7, 124.8, 122.3. Amide **S-9** was used in the subsequent step without further purification.

The following procedure is adapted from the literature.<sup>26</sup> A mixture of amide **S-9** (2.5 g, 10 mmol, 1.0 equiv), triethylamine (2.3 mL, 22 mmol, 2.2 equiv) and  $\text{CH}_2\text{Cl}_2$  (30 mL) was cooled to 0 °C. A solution of trichloroacetyl chloride (2.3 mL, 20 mmol, 2.2 equiv) and  $\text{CH}_2\text{Cl}_2$  (20 mL) was added, while the bath temperature was maintained between 0–5 °C. After the addition was finished, ice-cooled water (25 mL) was added and the layers were separated. The aqueous layer was extracted with  $\text{CH}_2\text{Cl}_2$  (10 mL). The combined organic layers were then washed with aq. KOH (5%, 30 mL), and the resulting aqueous layer was extracted with  $\text{CH}_2\text{Cl}_2$  (10 mL). The combined organic layers were then washed with aq.  $\text{H}_2\text{SO}_4$  (5%, 30 mL), and the resulting aqueous layer was extracted with  $\text{CH}_2\text{Cl}_2$  (10 mL). Finally, the combined organic layers were washed with  $\text{H}_2\text{O}$  (30 mL), and the resulting aqueous layer was extracted with  $\text{CH}_2\text{Cl}_2$  (10 mL). The combined organic layers were dried ( $\text{Na}_2\text{SO}_4$ ), filtered, and concentrated. The resulting residue was recrystallized (1:1  $\text{Et}_2\text{O}$ /hexanes) to give **S-10** (1.81 g, 78%) as orange crystals:  $^1\text{H}$  NMR (600 MHz,  $\text{CDCl}_3$ )  $\delta$  8.20 (s, 1H), 8.07 (d,  $J = 1.2$  Hz, 1H), 7.83 (d,  $J = 8.5$  Hz, 1H), 7.77 (d,  $J = 8.8$  Hz, 1H), 7.69 (dd,  $J = 8.8, 1.9$  Hz, 1H), 7.64 (dd,  $J = 8.5, 1.6$  Hz, 1H);  $^{13}\text{C}$  NMR (151 MHz,  $\text{CDCl}_3$ )  $\delta$  135.5, 134.0, 131.3, 130.7, 130.2, 129.9, 128.3, 127.5, 123.6, 118.8, 109.9.

The following procedure is adapted from the literature.<sup>25</sup> An oven-dried, two-necked round-bottomed flask was charged with aryl halide **S-10** (348.0 mg, 1.50 mmol, 1.0 equiv),  $\text{Pd}(\text{OAc})_2$  (6.7 mg, 0.09 mmol, 3 mol %), dppp (74.2 mg, 0.18 mmol, 6 mol

---

<sup>26</sup>Saednya, A. *Synthesis* **1985**, 184.

%), [HNEt<sub>3</sub>][BF<sub>4</sub>] (439 mg, 2.25 mmol, 1.5 equiv) and [bmin][BF<sub>4</sub>] (2.5 mL). The flask was then evacuated and refilled with N<sub>2</sub> three times. 1-(Vinyloxy)butane (0.33 mL, 3.0 mmol, 2.0 equiv) and then *i*-Pr<sub>2</sub>NEt (0.37 mL, 2.25 mmol, 1.5 equiv) were added via syringe. The reaction mixture was heated at 115 °C. After 8 h, the mixture was cooled to room temperature. Aq. HCl (5%, 5 mL) was added, and the mixture was stirred at room temperature for 0.5 h. CH<sub>2</sub>Cl<sub>2</sub> (20 mL) was added, and the layers were separated. The aqueous layer was extracted with CH<sub>2</sub>Cl<sub>2</sub> (2 x 20 mL). The combined organic layers were washed with H<sub>2</sub>O until neutral, dried (Na<sub>2</sub>SO<sub>4</sub>), filtered, and concentrated. The crude material was purified by silica gel chromatography (20% Et<sub>2</sub>O/hexanes) to give compound **S-11** (235.0 mg, 40%) as a yellow solid (mp 134–136 °C): <sup>1</sup>H NMR (600 MHz, CDCl<sub>3</sub>) δ 8.49 (s, 1H), 8.27 (s, 1H), 8.15 (dd, *J* = 8.6, 1.6 Hz, 1H), 8.07 (d, *J* = 8.5 Hz, 1H), 7.98 (d, *J* = 8.6 Hz, 1H), 7.69 (dd, *J* = 8.4, 1.5 Hz, 1H), 2.75 (s, 3H); <sup>13</sup>C NMR (151 MHz, CDCl<sub>3</sub>) δ 197.4, 136.9, 134.3, 134.0, 133.8, 130.7, 129.7, 129.0, 127.3, 125.8, 118.7, 111.9, 26.8; FTIR (NaCl/thin film) 3057, 2225, 1686, 1476, 1374, 1368, 1273, 1238, 1189, 902 cm<sup>-1</sup>; HRMS (CI+) [M+H]<sup>+</sup> calculated for C<sub>13</sub>H<sub>10</sub>NO: 196.0762, found: 196.0762.

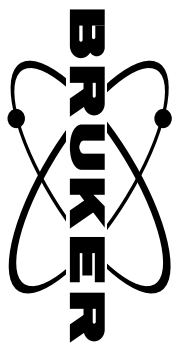

compound 2 1HNMR

- 7.850
- 7.847
- 7.837
- 7.832
- 7.828
- 7.818
- 7.814
- 7.789
- 7.768
- 7.745
- 7.743
- 7.516
- 7.513
- 7.499
- 7.495
- 7.481
- 7.476
- 7.462
- 7.458
- 7.363
- 7.358
- 7.354
- 7.352
- 7.341
- 7.337
- 7.333
- 7.322
- 7.314
- 7.308
- 7.301
- 7.291
- 7.284
- 7.254
- 7.250
- 7.244
- 7.236
- 7.233
- 7.216
- 4.367
- 4.349
- 1.786
- 1.768

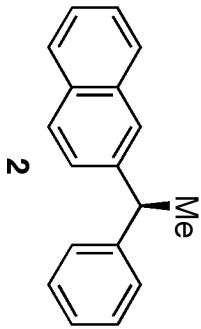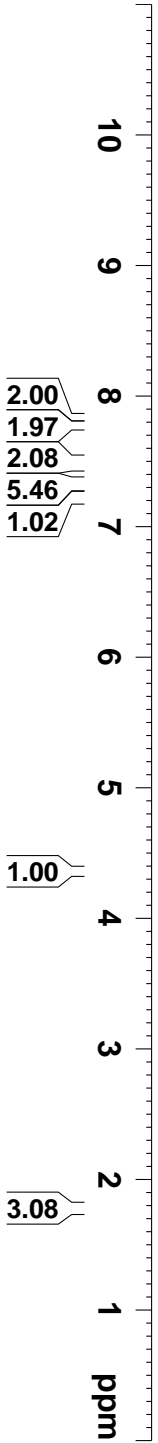

Current Data Parameters  
 NAME HH-4-046B  
 EXPNO 1  
 PROCNO 1

F2 - Acquisition Parameters  
 Date\_ 20121104  
 Time\_ 20.20  
 INSTRUM spect  
 PROBHD 5 mm CPQNP 1H/  
 PULPROG zg30  
 TD 65536  
 SOLVENT CDCl3  
 NS 16  
 DS 2  
 SWH 8278.146 Hz  
 FIDRES 0.126314 Hz  
 AQ 3.19584243 sec  
 RG 11.3  
 DW 60.400 usec  
 DE 6.00 usec  
 TE 298.2 K  
 D1 1.00000000 sec  
 TD0 1

==== CHANNEL f1 =====  
 NUC1 1H  
 P1 15.00 usec  
 PL1 4.90 dB  
 PL1W 3.30822015 W  
 SFO1 400.1324710 MHz  
 F2 - Processing parameters  
 SI 32768  
 SF 400.1300000 MHz  
 WDW EM  
 SSB 0  
 LB 0.30 Hz  
 GB 0  
 PC 1.00



Compound 2 13CNMR

- 146.25
- 143.79
- 133.52
- 132.10
- 128.43
- 127.98
- 127.79
- 127.75
- 127.60
- 126.89
- 126.14
- 125.98
- 125.40
- 125.37

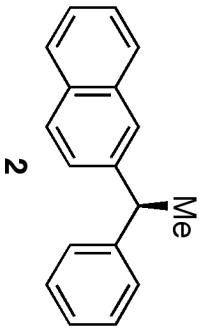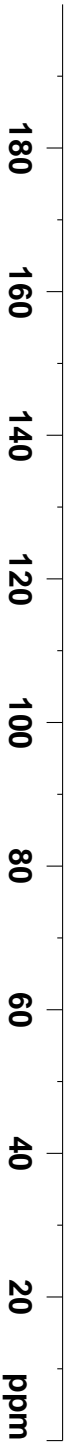

Current Data Parameters  
NAME HH-4-046B  
EXPNO 2  
PROCNO 1

F2 - Acquisition Parameters  
Date\_ 20121104  
Time 20.37

INSTRUM spect  
PROBHD 5 mm CPQNP 1H/  
PULPROG zgpg30  
TD 65536  
SOLVENT CDCl3  
NS 256  
DS 4  
SWH 23980.814 Hz  
FIDRES 0.365918 Hz  
AQ 1.3664756 sec  
RG 512  
DW 20.850 usec  
DE 18.00 usec  
TE 298.1 K  
D1 2.00000000 sec  
D11 0.03000000 sec  
TD0 1

==== CHANNEL F1 =====  
NUC1 13C  
P1 9.25 usec  
PL1 0.55 dB  
PL1W 35.18820572 W  
SFO1 100.6228298 MHz

==== CHANNEL F2 =====  
CPDPRG2 waltz16  
NUC2 1H  
PCPD2 90.00 usec  
PL2 4.90 dB  
PL12 20.46 dB  
PL13 21.00 dB  
PL2W 3.30822015 W  
PL12W 0.09195905 W  
PL13W 0.08120718 W  
SFO2 400.1316005 MHz

F2 - Processing parameters  
SI 32768  
SF 100.6127690 MHz  
WDW EM  
SSB 0  
LB 1.00 Hz  
GB 0  
PC 1.40

Compound 3 1HNMR

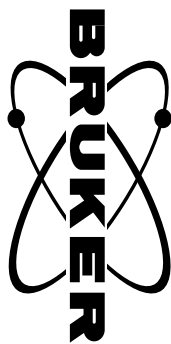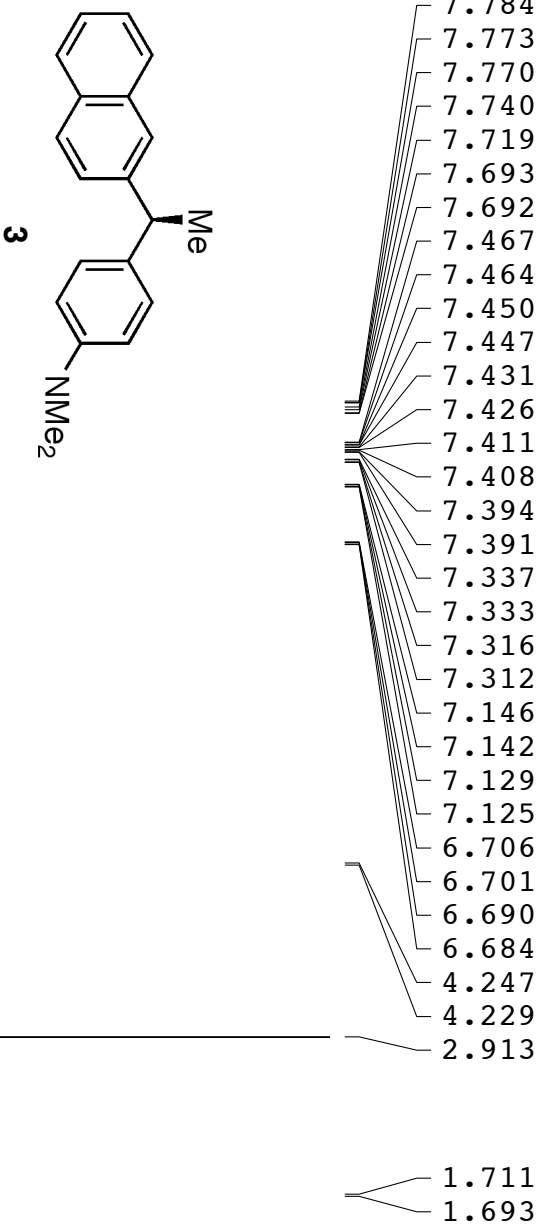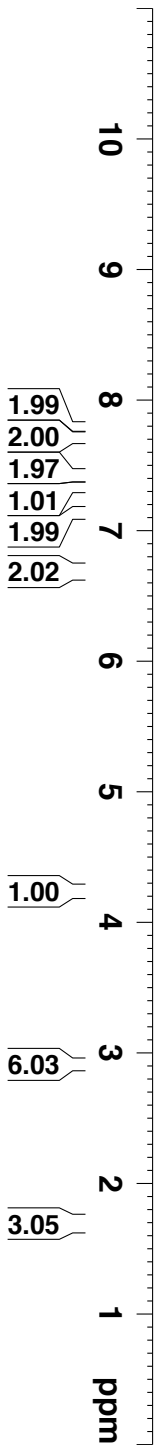

Current Data Parameters  
 NAME SDG-2-177A1  
 EXPNO 1  
 PROCNO 1

F2 - Acquisition Parameters  
 Date\_ 20121118  
 Time\_ 8.29  
 INSTRUM spect  
 PROBHD 5 mm CPQNP 1H/  
 PULPROG zg30  
 TD 65536  
 SOLVENT CDCl3  
 NS 16  
 DS 2  
 SWH 8278.146 Hz  
 FIDRES 0.126314 Hz  
 AQ 3.9584243 sec  
 RG 12.7  
 DW 60.400 usec  
 DE 6.00 usec  
 TE 298.2 K  
 D1 1.00000000 sec  
 TD0 1

==== CHANNEL f1 =====  
 NUC1 1H  
 P1 15.00 usec  
 PL1 4.90 dB  
 PL1W 3.30822015 W  
 SFO1 400.1324710 MHz

F2 - Processing parameters  
 SI 32768  
 SF 400.1300095 MHz  
 WDW EM  
 SSB 0  
 LB 0.30 Hz  
 GB 0  
 PC 1.00

Compound 3 13CNMR

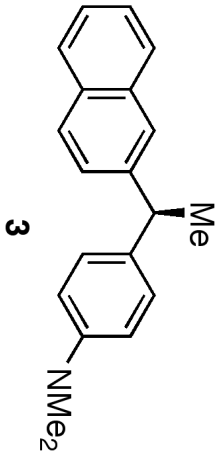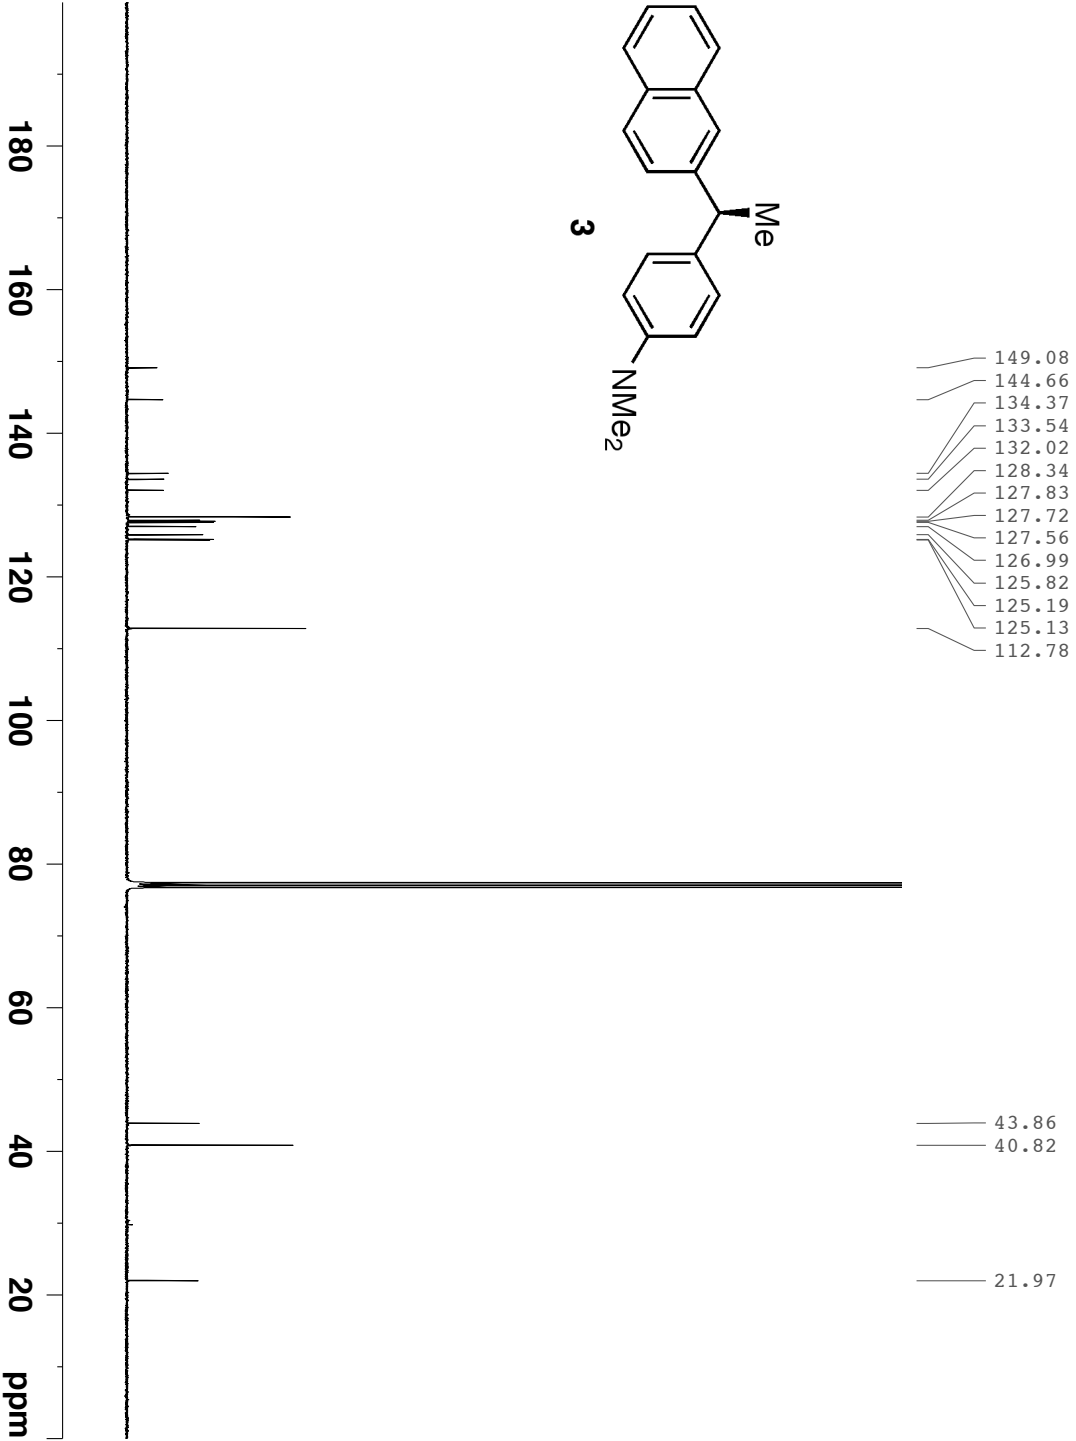

149.08  
144.66  
134.37  
133.54  
132.02  
128.34  
127.83  
127.72  
127.56  
126.99  
125.82  
125.19  
125.13  
112.78

43.86  
40.82  
21.97

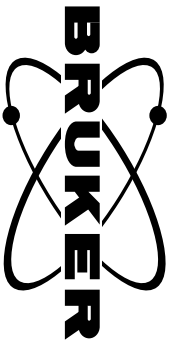

Current Data Parameters  
NAME SDG-2-177A1  
EXPNO 2  
PROCNO 1

F2 - Acquisition Parameters  
Date\_ 20121118  
Time\_ 8.45

INSTRUM spect  
PROBHD 5 mm CPQNP 1H/  
PULPROG zgpg30  
TD 65536  
SOLVENT CDCl3  
NS 256  
DS 4  
SWH 23980.814 Hz  
FIDRES 0.365918 Hz  
AQ 1.3664756 sec  
RG 512  
DW 20.850 usec  
DE 18.00 usec  
TE 298.2 K  
D1 2.00000000 sec  
D11 0.03000000 sec  
TD0 1

==== CHANNEL F1 =====  
NUC1 13C  
P1 9.25 usec  
PL1 0.55 dB  
PL1W 35.18820572 W  
SFO1 100.6228298 MHz

==== CHANNEL F2 =====  
CPDPRG2 waltz16  
NUC2 1H  
PCPD2 90.00 usec  
PL2 4.90 dB  
PL12 20.46 dB  
PL13 21.00 dB  
PL12W 3.30822015 W  
PL13W 0.09195905 W  
SFO2 400.1316005 MHz

F2 - Processing parameters  
SI 32768  
SF 100.6127690 MHz  
WDW EM  
SSB 0  
LB 1.00 Hz  
GB 0  
PC 1.40



Compound 4 1HNMR

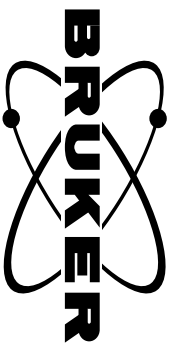

S45

- 7.827
- 7.819
- 7.790
- 7.768
- 7.725
- 7.516
- 7.513
- 7.499
- 7.496
- 7.481
- 7.476
- 7.461
- 7.458
- 7.444
- 7.441
- 7.356
- 7.352
- 7.335
- 7.331
- 7.284
- 7.261
- 7.237
- 7.230
- 7.209
- 6.897
- 6.890
- 6.873
- 6.868
- 6.861
- 4.340
- 4.322
- 4.304
- 4.286
- 3.819
- 1.761
- 1.743

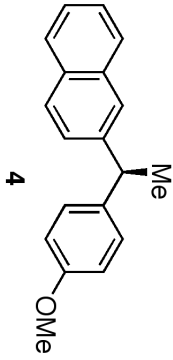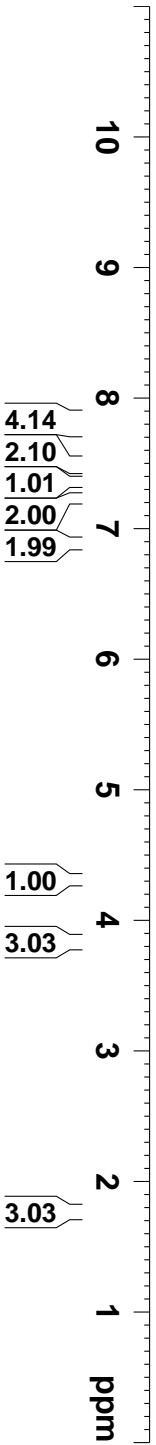

Current Data Parameters  
 NAME HH-4-049A  
 EXPNO 1  
 PROCNO 1

F2 - Acquisition Parameters  
 Date\_ 20121115  
 Time\_ 16.26  
 INSTRUM spect  
 PROBHD 5 mm GPQNP 1H/  
 PULPROG zg30  
 TD 65536  
 SOLVENT CDCl3  
 NS 16  
 DS 2  
 SWH 8278.146 Hz  
 FIDRES 0.126314 Hz  
 AQ 3.9584243 sec  
 RG 9  
 DW 60.400 usec  
 DE 6.00 usec  
 TE 298.1 K  
 D1 1.00000000 sec  
 TD0 1

==== CHANNEL f1 =====  
 NUC1 1H  
 P1 15.00 usec  
 PL1 4.90 dB  
 PL1W 3.30822015 W  
 SFO1 400.1324710 MHz

F2 - Processing parameters  
 SI 32768  
 SF 400.1300000 MHz  
 WDW EM  
 SSB 0  
 LB 0.30 Hz  
 GB 0  
 PC 1.00

Compound 4 13CNMR

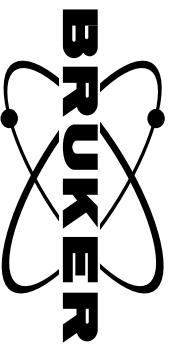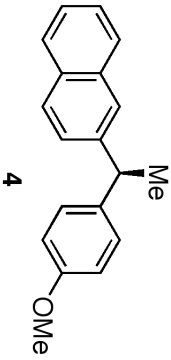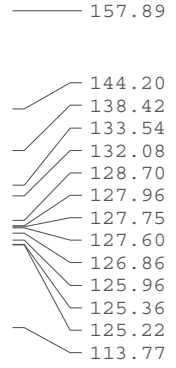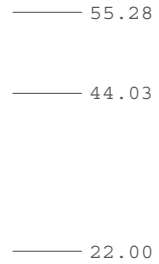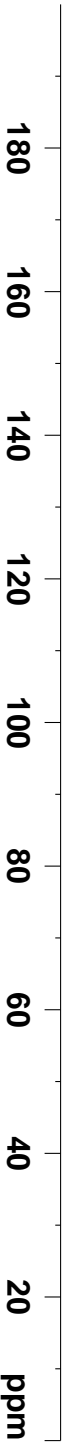

Current Data Parameters  
 NAME HH-4-049A  
 EXPNO 2  
 PROCNO 1

F2 - Acquisition Parameters  
 Date\_ 20121115  
 Time 23.19

INSTRUM spect  
 PROBHD 5 mm CPQNP 1H/  
 PULPROG zgpg30  
 TD 65536  
 SOLVENT CDCl3  
 NS 256  
 DS 4  
 SWH 23980.814 Hz  
 FIDRES 0.365918 Hz  
 AQ 1.3664756 sec  
 RG 512  
 DW 20.850 usec  
 DE 18.00 usec  
 TE 298.1 K  
 D1 2.00000000 sec  
 D11 0.03000000 sec  
 TD0 1

==== CHANNEL F1 =====  
 NUC1 13C  
 P1 9.25 usec  
 PL1 0.55 dB  
 PL1W 35.18820572 W  
 SFO1 100.6228298 MHz

==== CHANNEL F2 =====  
 CPDPRG2 waltz16  
 NUC2 1H  
 PCPD2 90.00 usec  
 PL2 4.90 dB  
 PL12 20.46 dB  
 PL13 21.00 dB  
 PL2W 3.30822015 W  
 PL12W 0.09195905 W  
 PL13W 0.08120718 W  
 SFO2 400.1316005 MHz

F2 - Processing parameters  
 SI 32768  
 SF 100.6127690 MHz  
 WDW EM  
 SSB 0  
 LB 1.00 Hz  
 GB 0  
 PC 1.40

Compound 5 <sup>1</sup>H NMR



Current Data Parameters  
 NAME HH-4-047A  
 EXPNO 1  
 PROCNO 1

F2 - Acquisition Parameters  
 Date\_ 20121104  
 Time\_ 20.43

INSTRUM spect  
 PROBHD 5 mm GPQNP 1H/  
 PULPROG zg30  
 TD 65536  
 SOLVENT CDCl3  
 NS 16  
 DS 2  
 SWH 8278.146 Hz  
 FIDRES 0.126314 Hz  
 AQ 3.9584243 sec  
 RG 11.3  
 DW 60.400 usec  
 DE 6.00 usec  
 TE 298.2 K  
 D1 1.00000000 sec  
 TD0 1

==== CHANNEL f1 =====  
 NUC1 1H  
 P1 15.00 usec  
 PL1 4.90 dB  
 PL1W 3.30822015 W  
 SFO1 400.1324710 MHz

F2 - Processing parameters  
 SI 32768  
 SF 400.1300000 MHz  
 WDW EM  
 SSB 0  
 LB 0.30 Hz  
 GB 0  
 PC 1.00

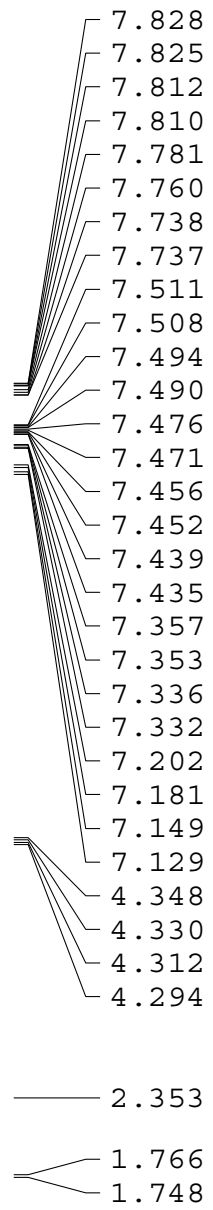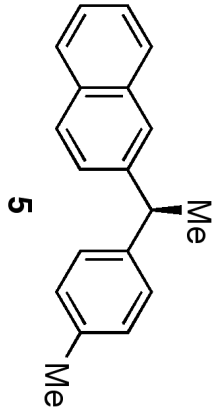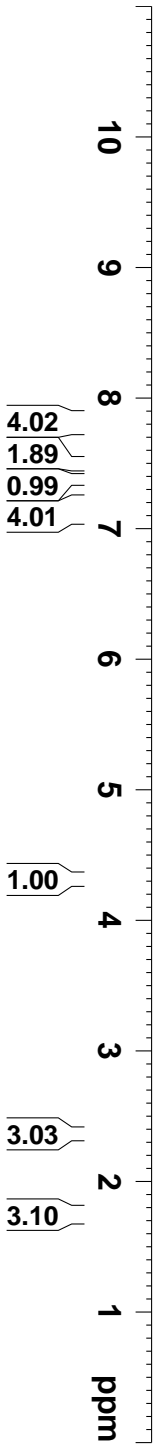

Compound 5 <sup>13</sup>CNMR

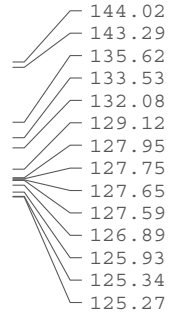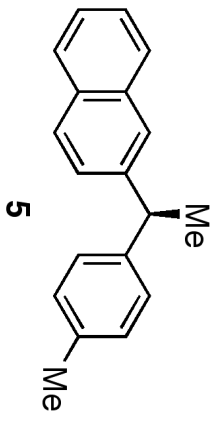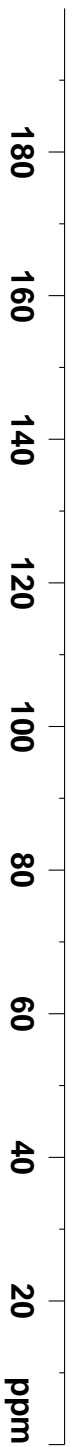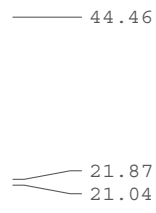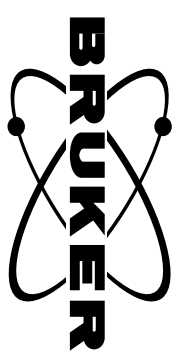

Current Data Parameters  
 NAME HH-4-047A  
 EXPNO 2  
 PROCNO 1

F2 - Acquisition Parameters  
 Date\_ 20121104  
 Time\_ 20.59

INSTRUM spect  
 PROBHD 5 mm CPQNP 1H/  
 PULPROG zgpg30  
 TD 65536  
 SOLVENT CDCl3  
 NS 256  
 DS 4  
 SWH 23980.814 Hz  
 FIDRES 0.365918 Hz  
 AQ 1.3664756 sec  
 RG 512  
 DW 20.850 usec  
 DE 18.00 usec  
 TE 298.2 K  
 D1 2.00000000 sec  
 D11 0.03000000 sec  
 TD0 1

==== CHANNEL F1 =====  
 NUC1 13C  
 P1 9.25 usec  
 PL1 0.55 dB  
 PL1W 35.18820572 W  
 SFO1 100.6228298 MHz

==== CHANNEL F2 =====  
 CPDPRG2 waltz16  
 NUC2 1H  
 PCPD2 90.00 usec  
 PL2 4.90 dB  
 PL12 20.46 dB  
 PL13 21.00 dB  
 PL2W 3.30822015 W  
 PL12W 0.09195905 W  
 PL13W 0.08120718 W  
 SFO2 400.1316005 MHz

F2 - Processing parameters  
 SI 32768  
 SF 100.6127690 MHz  
 WDW EM  
 SSB 0  
 LB 1.00 Hz  
 GB 0  
 PC 1.40

Compound 6 1H NMR

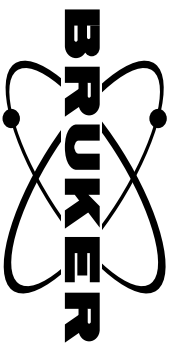

- 7.814
- 7.797
- 7.784
- 7.773
- 7.752
- 7.654
- 7.502
- 7.498
- 7.485
- 7.481
- 7.471
- 7.466
- 7.462
- 7.452
- 7.448
- 7.434
- 7.431
- 7.327
- 7.322
- 7.306
- 7.301
- 7.225
- 7.206
- 7.103
- 7.073
- 7.054
- 7.024
- 4.514
- 4.496
- 4.478
- 4.460
- 2.352
- 2.286
- 1.730
- 1.712

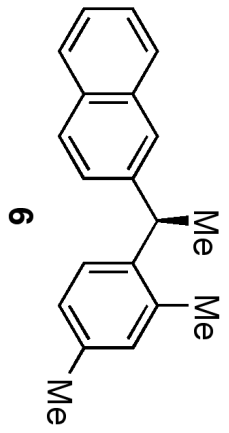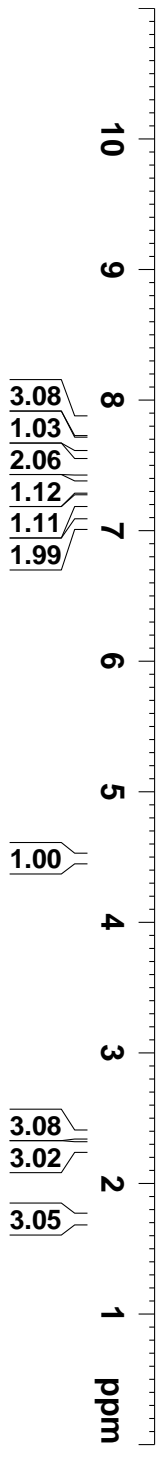

Current Data Parameters  
 NAME QZ-3-060A  
 EXPNO 1  
 PROCNO 1

F2 - Acquisition Parameters  
 Date\_ 20121104  
 Time\_ 21.27  
 INSTRUM spect  
 PROBHD 5 mm GPQNP 1H/  
 PULPROG zg30  
 TD 65536  
 SOLVENT CDCl3  
 NS 16  
 DS 2  
 SWH 8278.146 Hz  
 FIDRES 0.126314 Hz  
 AQ 3.9584243 sec  
 RG 11.3  
 DW 60.400 usec  
 DE 6.00 usec  
 TE 298.2 K  
 D1 1.00000000 sec  
 TD0 1

==== CHANNEL f1 =====  
 NUC1 1H  
 P1 15.00 usec  
 PL1 4.90 dB  
 PL1W 3.30822015 W  
 SFO1 400.1324710 MHz

F2 - Processing parameters  
 SI 32768  
 SF 400.1300000 MHz  
 WDW EM  
 SSB 0  
 LB 0.30 Hz  
 GB 0  
 PC 1.00

Compound 6 <sup>13</sup>CNMR

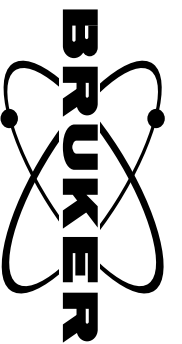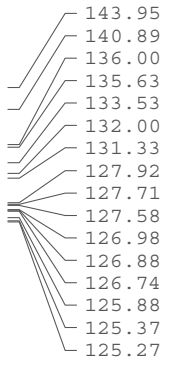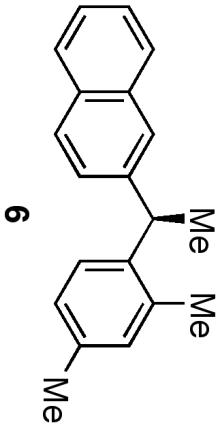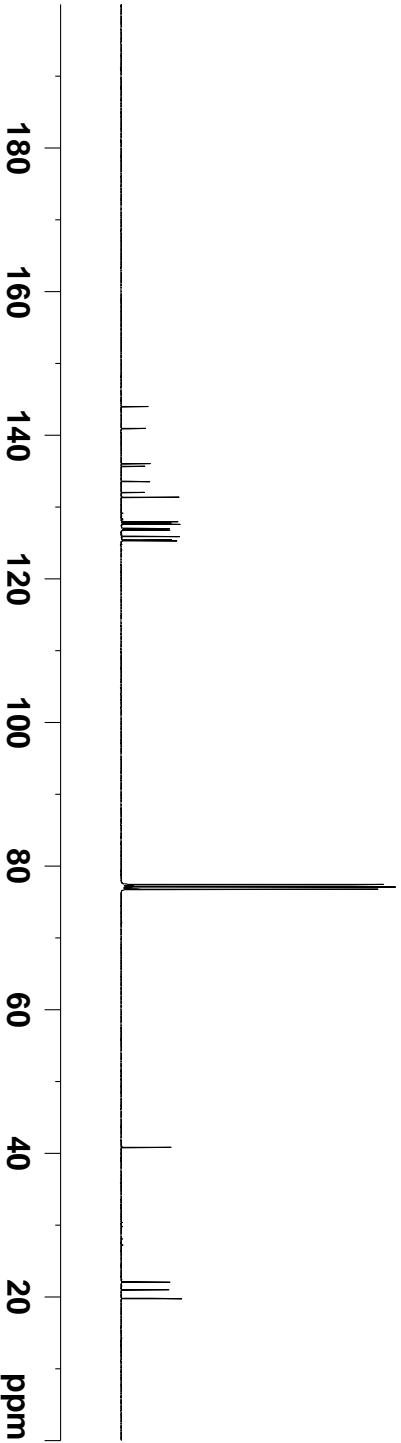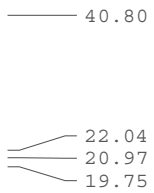

Current Data Parameters  
 NAME QZ-3-060A  
 EXPNO 2  
 PROCNO 1

F2 - Acquisition Parameters  
 Date\_ 20121104  
 Time\_ 21.43

INSTRUM spect  
 PROBHD 5 mm CPQNP 1H/  
 PULPROG zgpg30  
 TD 65536  
 SOLVENT CDCl3  
 NS 256  
 DS 4

SWH 23980.814 Hz  
 FIDRES 0.365918 Hz  
 AQ 1.3664756 sec

RG 512  
 DW 20.850 usec  
 DE 18.00 usec  
 TE 298.2 K

D1 2.00000000 sec  
 D11 0.03000000 sec  
 TD0 1

==== CHANNEL F1 =====  
 NUC1 13C  
 P1 9.25 usec  
 PL1 0.55 dB  
 PL1W 35.18820572 W  
 SF01 100.6228298 MHz

==== CHANNEL F2 =====  
 CPDPRG2 waltz16  
 NUC2 1H  
 PCPD2 90.00 usec  
 PL2 4.90 dB  
 PL12 20.46 dB  
 PL13 21.00 dB  
 PL2W 3.30822015 W  
 PL12W 0.09195905 W  
 PL13W 0.08120718 W  
 SF02 400.1316005 MHz

F2 - Processing parameters  
 SI 32768  
 SF 100.6127690 MHz  
 WDW EM  
 SSB 0  
 LB 1.00 Hz  
 GB 0  
 PC 1.40

Compound 7 1H NMR

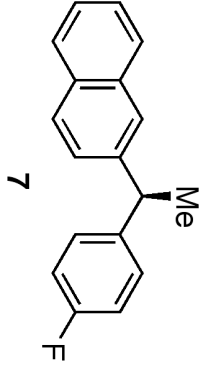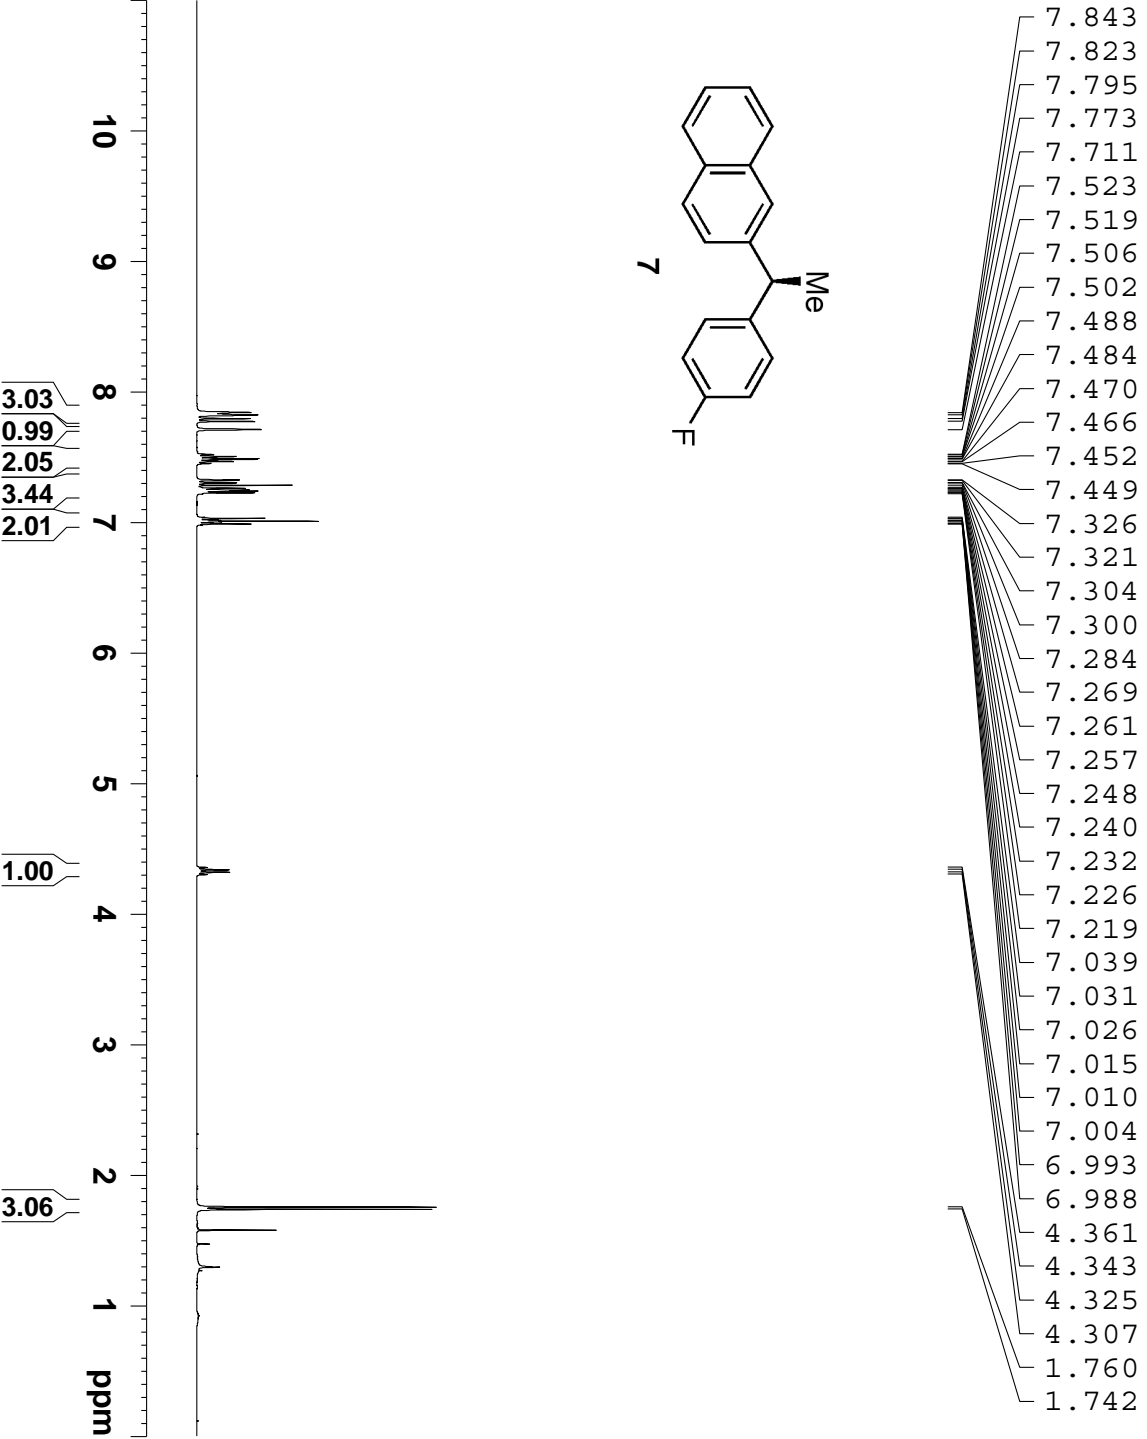

- 7.843
- 7.823
- 7.795
- 7.773
- 7.711
- 7.523
- 7.519
- 7.506
- 7.502
- 7.488
- 7.484
- 7.470
- 7.466
- 7.452
- 7.449
- 7.326
- 7.321
- 7.304
- 7.300
- 7.284
- 7.269
- 7.261
- 7.257
- 7.248
- 7.240
- 7.232
- 7.226
- 7.219
- 7.039
- 7.031
- 7.026
- 7.015
- 7.010
- 7.004
- 6.993
- 6.988
- 4.361
- 4.343
- 4.325
- 4.307
- 1.760
- 1.742

Current Data Parameters  
 NAME HH-4-69 A  
 EXPNO 1  
 PROCNO 1

F2 - Acquisition Parameters  
 Date\_ 20121117  
 Time\_ 5.15  
 INSTRUM spect  
 PROBHD 5 mm GPQNP 1H/  
 PULPROG zg30  
 TD 65536  
 SOLVENT CDCl3  
 NS 16  
 DS 2  
 SWH 8278.146 Hz  
 FIDRES 0.126314 Hz  
 AQ 3.9584243 sec  
 RG 11.3  
 DW 60.400 usec  
 DE 6.00 usec  
 TE 298.1 K  
 D1 1.00000000 sec  
 TD0 1

==== CHANNEL f1 =====  
 NUC1 1H  
 P1 15.00 usec  
 PL1 4.90 dB  
 PL1W 3.30822015 W  
 SFO1 400.1324710 MHz

F2 - Processing parameters  
 SI 32768  
 SF 400.1300000 MHz  
 WDW EM  
 SSB 0  
 LB 0.30 Hz  
 GB 0  
 PC 1.00

Compound 7 13CNMR

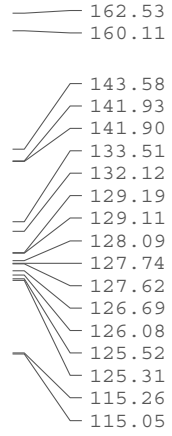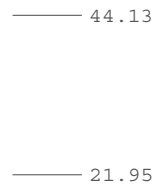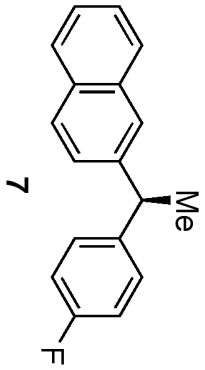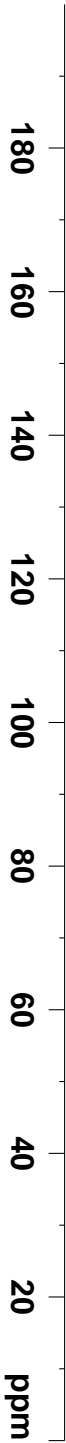

Current Data Parameters  
 NAME HH-4-69 A  
 EXPNO 2  
 PROCNO 1

F2 - Acquisition Parameters  
 Date\_ 20121117  
 Time\_ 5.32

INSTRUM spect  
 PROBHD 5 mm CPQNP 1H/  
 PULPROG zgpg30  
 TD 65536  
 SOLVENT CDCl3  
 NS 256  
 DS 4  
 SWH 23980.814 Hz  
 FIDRES 0.365918 Hz  
 AQ 1.3664756 sec  
 RG 512  
 DW 20.850 usec  
 DE 18.00 usec  
 TE 298.2 K  
 D1 2.00000000 sec  
 D11 0.03000000 sec  
 TD0 1

==== CHANNEL F1 =====  
 NUC1 13C  
 P1 9.25 usec  
 PL1 0.55 dB  
 PL1W 35.18820572 W  
 SFO1 100.6228298 MHz

==== CHANNEL F2 =====  
 CPDPRG2 waltz16  
 NUC2 1H  
 PCPD2 90.00 usec  
 PL2 4.90 dB  
 PL12 20.46 dB  
 PL13 21.00 dB  
 PL2W 3.30822015 W  
 PL12W 0.09195905 W  
 PL13W 0.08120718 W  
 SFO2 400.1316005 MHz

F2 - Processing parameters  
 SI 32768  
 SF 100.6127690 MHz  
 WDW EM  
 SSB 0  
 LB 1.00 Hz  
 GB 0  
 PC 1.40



Compound 8 1H NMR

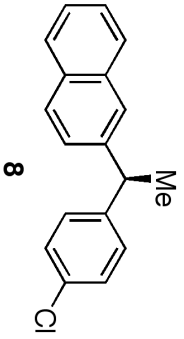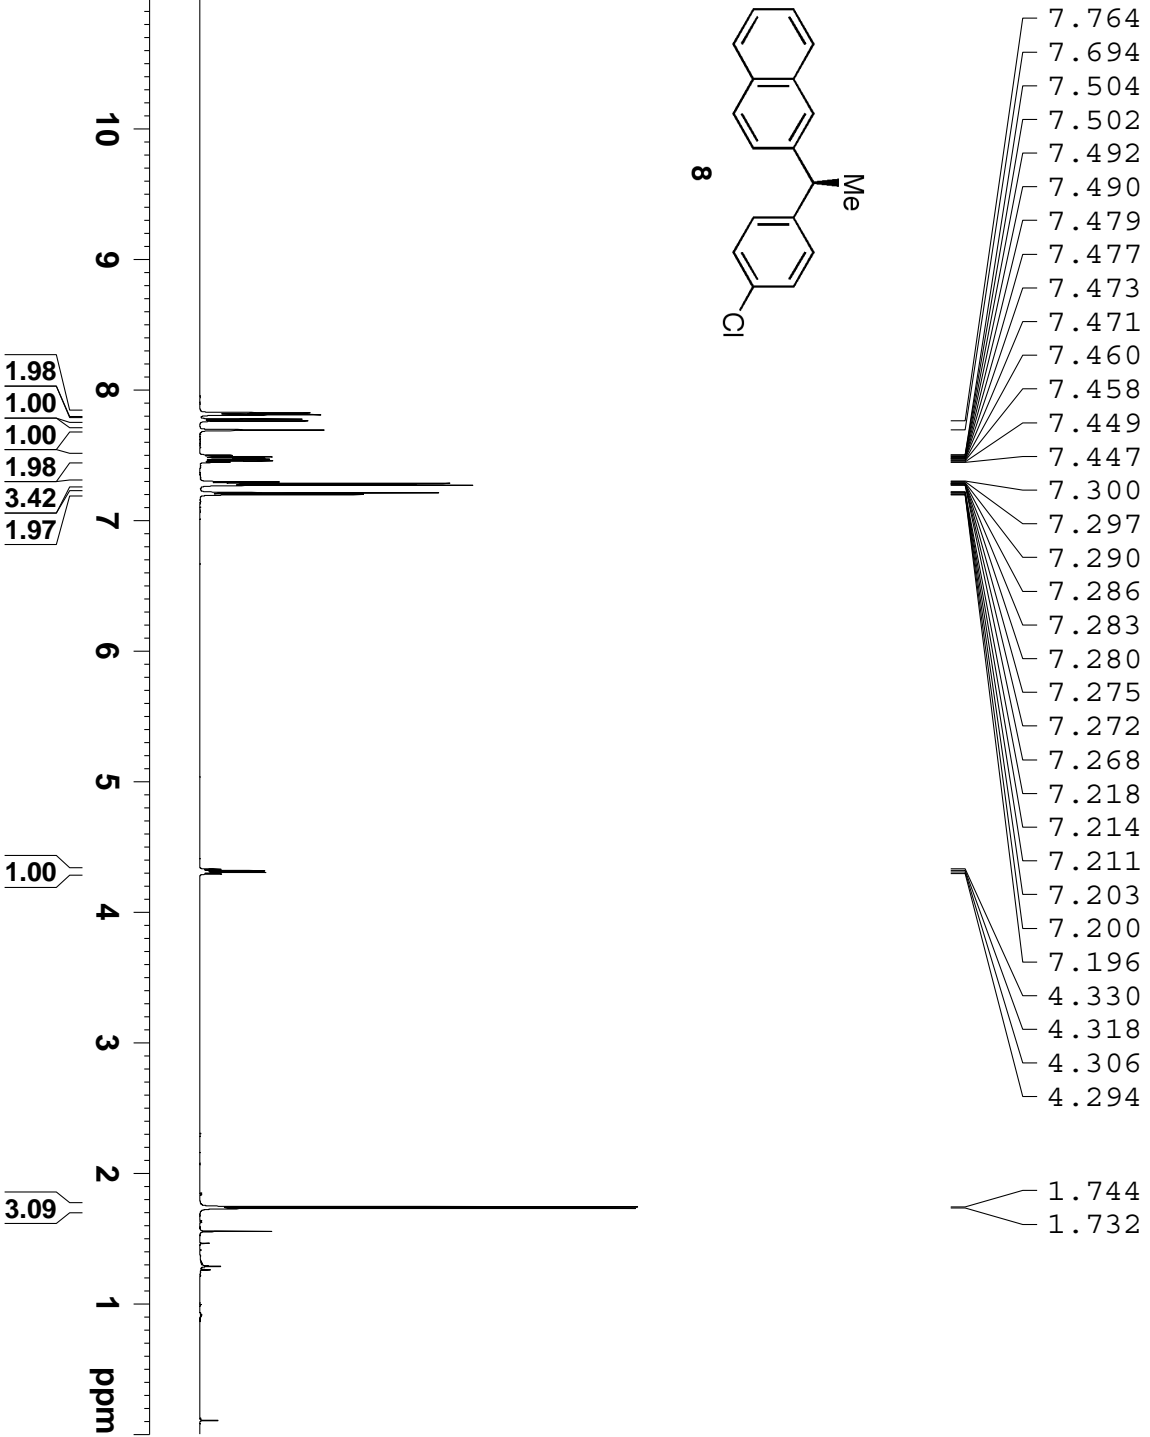

Current Data Parameters  
 NAME QZ-Compound 8  
 EXPNO 1  
 PROCNO 1

F2 - Acquisition Parameters  
 Date\_ 20121209  
 Time\_ 13.13  
 INSTRUM spect  
 PROBHD 5 mm PABBO BB/  
 PULPROG zg30  
 TD 65536  
 SOLVENT CDCl3  
 NS 8  
 DS 2  
 SWH 8403.361 Hz  
 FIDRES 0.128225 Hz  
 AQ 3.8994420 sec  
 RG 144  
 DW 59.500 usec  
 DE 17.39 usec  
 TE 298.1 K  
 D1 1.00000000 sec  
 TD0 1

==== CHANNEL f1 =====  
 SF01 600.3233018 MHz  
 NUC1 1H  
 P1 10.77 usec  
 F2 - Processing parameters  
 SI 65536  
 SF 600.3200047 MHz  
 WDW EM  
 SSB 0  
 LB 0.30 Hz  
 GB 0  
 PC 1.00

Compound 8 13CNMR



- 144.74
- 143.21
- 133.51
- 132.17
- 131.86
- 129.14
- 128.52
- 128.13
- 127.73
- 127.61
- 126.62
- 126.09
- 125.55
- 125.38

- 44.28
- 21.73

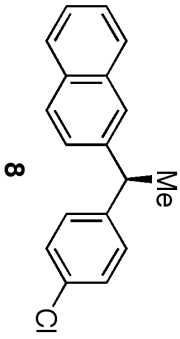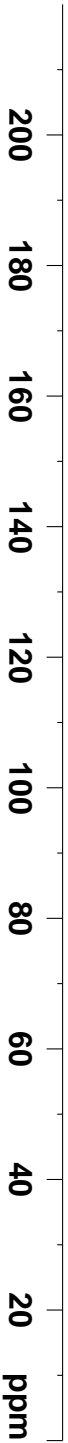

Current Data Parameters  
 NAME QZ-Compound 8  
 EXPNO 2  
 PROCNO 1

F2 - Acquisition Parameters  
 Date\_ 20121209  
 Time\_ 13.23  
 INSTRUM spect  
 PROBHD 5 mm PABBO BB/  
 PULPROG zgpg55  
 TD 65536  
 SOLVENT CDCl3  
 NS 256  
 DS 4  
 SWH 34722.223 Hz  
 FIDRES 0.529819 Hz  
 AQ 0.9437684 sec  
 RG 2050  
 DW 14.400 usec  
 DE 19.34 usec  
 TE 298.1 K  
 D1 1.10000002 sec  
 D11 0.03000000 sec  
 TD0 1

==== CHANNEL f1 =====  
 SFO1 150.9656784 MHz  
 NUC1 13C  
 P1 10.63 usec

F2 - Processing parameters  
 SI 32768  
 SF 150.9505840 MHz  
 WDW EM  
 SSB 0  
 LB 1.00 Hz  
 GB 0  
 PC 1.40

Compound 9 1H NMR



- 7.851
- 7.845
- 7.839
- 7.832
- 7.829
- 7.810
- 7.788
- 7.736
- 7.590
- 7.569
- 7.538
- 7.535
- 7.521
- 7.517
- 7.504
- 7.503
- 7.499
- 7.485
- 7.481
- 7.468
- 7.464
- 7.412
- 7.391
- 7.320
- 7.316
- 7.299
- 7.294
- 4.434
- 4.416
- 4.398
- 4.380
- 1.798
- 1.780

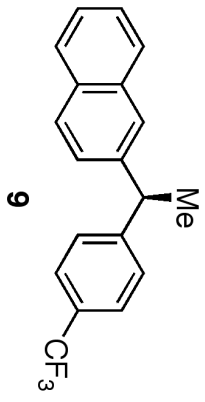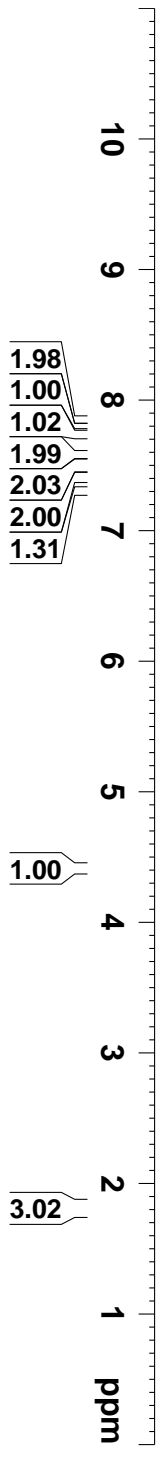

Current Data Parameters  
 NAME QZ-3-061A  
 EXPNO 1  
 PROCNO 1

F2 - Acquisition Parameters  
 Date\_ 20121104  
 Time\_ 22.11  
 INSTRUM spect  
 PROBHD 5 mm GPQNP 1H/  
 PULPROG zg30  
 TD 65536  
 SOLVENT CDCl3  
 NS 16  
 DS 2  
 SWH 8278.146 Hz  
 FIDRES 0.126314 Hz  
 AQ 3.9584243 sec  
 RG 11.3  
 DW 60.400 usec  
 DE 6.00 usec  
 TE 298.2 K  
 D1 1.00000000 sec  
 TD0 1

==== CHANNEL f1 =====  
 NUC1 1H  
 P1 15.00 usec  
 PL1 4.90 dB  
 PL1W 3.30822015 W  
 SFO1 400.1324710 MHz

F2 - Processing parameters  
 SI 32768  
 SF 400.1300000 MHz  
 WDW EM  
 SSB 0  
 LB 0.30 Hz  
 GB 0  
 PC 1.00

Compound 9 13C NMR

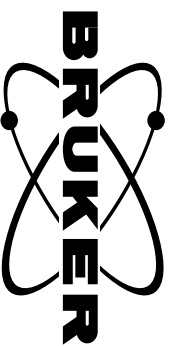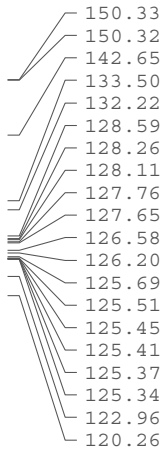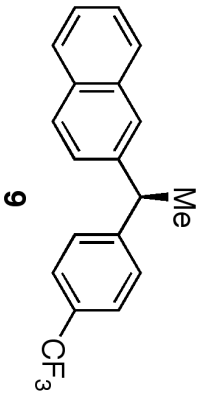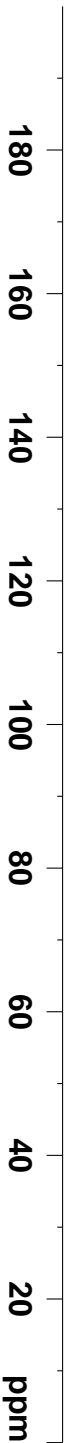

Current Data Parameters  
 NAME QZ-3-061A  
 EXPNO 2  
 PROCNO 1

F2 - Acquisition Parameters  
 Date\_ 20121104  
 Time\_ 22.27  
 INSTRUM spect  
 PROBHD 5 mm CPQNP 1H/  
 PULPROG zgpg30  
 TD 65536  
 SOLVENT CDCl3  
 NS 256  
 DS 4  
 SWH 23980.814 Hz  
 FIDRES 0.365918 Hz  
 AQ 1.3664756 sec  
 RG 512  
 DW 20.850 usec  
 DE 18.00 usec  
 TE 298.1 K  
 D1 2.00000000 sec  
 D11 0.03000000 sec  
 TD0 1

==== CHANNEL F1 =====  
 NUC1 13C  
 P1 9.25 usec  
 PL1 0.55 dB  
 PL1W 35.18820572 W  
 SF01 100.6228298 MHz

==== CHANNEL F2 =====  
 CPDPRG2 waltz16  
 NUC2 1H  
 PCPD2 90.00 usec  
 PL2 4.90 dB  
 PL12 20.46 dB  
 PL13 21.00 dB  
 PL2W 3.30822015 W  
 PL12W 0.09195905 W  
 PL13W 0.08120718 W  
 SF02 400.1316005 MHz

F2 - Processing parameters  
 SI 32768  
 SF 100.6127690 MHz  
 WDW EM  
 SSB 0  
 LB 1.00 Hz  
 GB 0  
 PC 1.40

Compound 10 1H NMR

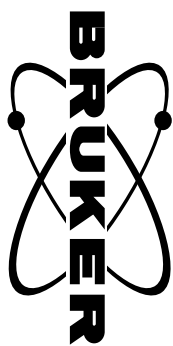

7.757  
7.736  
7.687  
7.596  
7.583  
7.557  
7.536  
7.516  
7.506  
7.484  
7.481  
7.467  
7.463  
7.448  
7.443  
7.429  
7.425  
7.411  
7.408  
7.316  
7.312  
7.295  
7.290  
6.867  
6.839  
6.814  
6.748  
6.745  
6.725  
6.663  
5.908  
4.266  
4.249  
4.231  
4.213  
1.705  
1.687

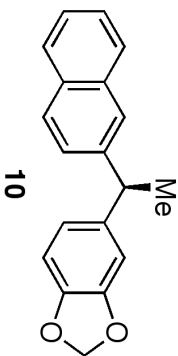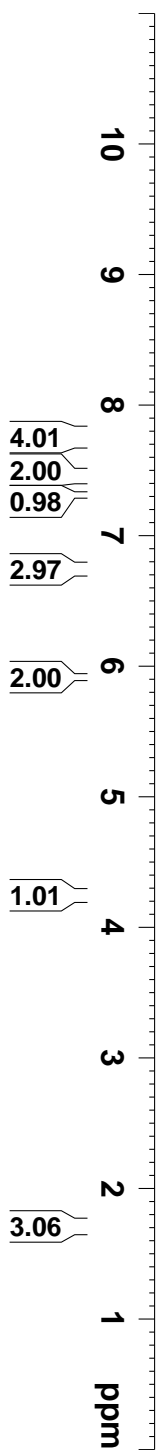

Current Data Parameters  
NAME SDG-2-177B1  
EXPNO 1  
PROCNO 1

F2 - Acquisition Parameters  
Date\_ 20121118  
Time\_ 9.13  
INSTRUM spect  
PROBHD 5 mm GPQNP 1H/  
PULPROG zg30  
TD 65536  
SOLVENT CDCl3  
NS 16  
DS 2  
SWH 8278.146 Hz  
FIDRES 0.126314 Hz  
AQ 3.9584243 sec  
RG 12.7  
DW 60.400 usec  
DE 6.00 usec  
TE 298.2 K  
D1 1.00000000 sec  
TD0 1

==== CHANNEL f1 =====  
NUC1 1H  
P1 15.00 usec  
PL1 4.90 dB  
PL1W 3.30822015 W  
SFO1 400.1324710 MHz

F2 - Processing parameters  
SI 32768  
SF 400.1300105 MHz  
WDW EM  
SSB 0  
LB 0.30 Hz  
GB 0  
PC 1.00

Compound 10 13CNMR

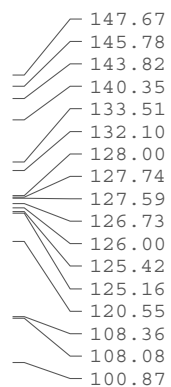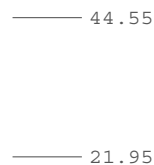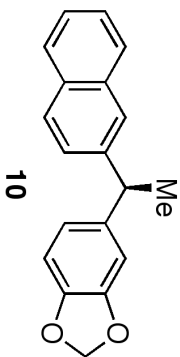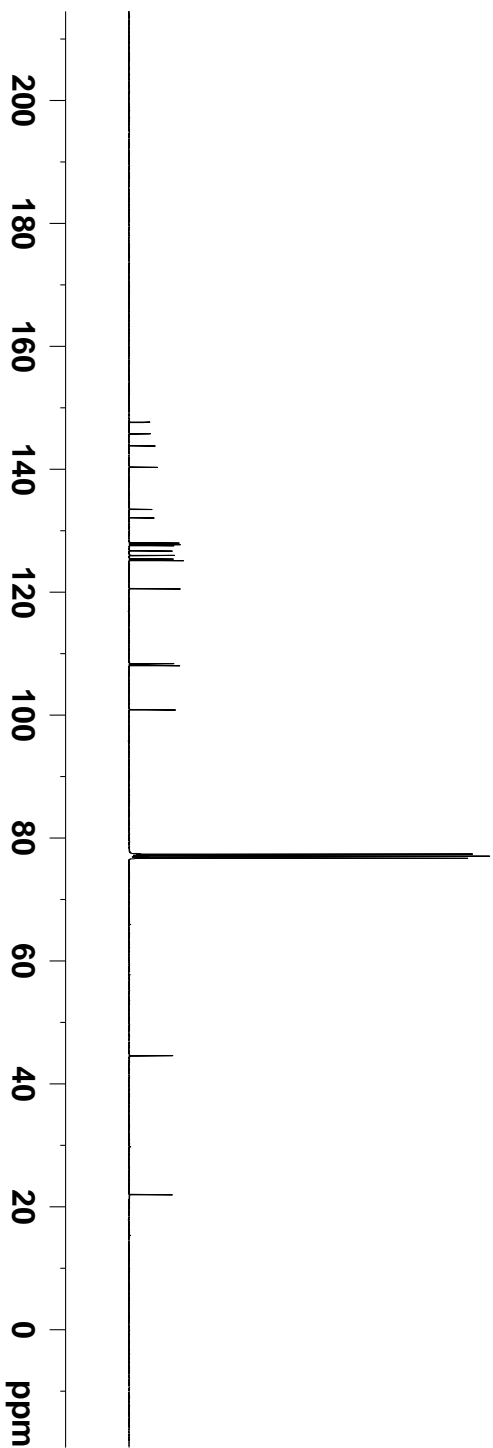

Current Data Parameters  
 NAME SDG-2-177B1  
 EXPNO 2  
 PROCNO 1

F2 - Acquisition Parameters  
 Date\_ 20121118  
 Time\_ 9.29

INSTRUM spect  
 PROBHD 5 mm CPQNP 1H/  
 PULPROG zgpg30  
 TD 65536  
 SOLVENT CDCl3  
 NS 256  
 DS 4  
 SWH 23980.814 Hz  
 FIDRES 0.365918 Hz  
 AQ 1.3664756 sec  
 RG 512  
 DW 20.850 usec  
 DE 18.00 usec  
 TE 298.2 K  
 D1 2.00000000 sec  
 D11 0.03000000 sec  
 TD0 1

==== CHANNEL F1 =====  
 NUC1 13C  
 P1 9.25 usec  
 PL1 0.55 dB  
 PL1W 35.18820572 W  
 SFO1 100.6228298 MHz

==== CHANNEL F2 =====  
 CPDPRG2 waltz16  
 NUC2 1H  
 PCPD2 90.00 usec  
 PL2 4.90 dB  
 PL12 20.46 dB  
 PL13 21.00 dB  
 PL2W 3.30822015 W  
 PL12W 0.09195905 W  
 PL13W 0.08120718 W  
 SFO2 400.1316005 MHz

F2 - Processing parameters  
 SI 32768  
 SF 100.6127690 MHz  
 WDW EM  
 SSB 0  
 LB 1.00 Hz  
 GB 0  
 PC 1.40

Compound 11 1H NMR

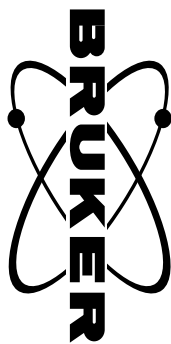

7.870  
7.859  
7.838  
7.828  
7.819  
7.809  
7.806  
7.781  
7.760  
7.732  
7.517  
7.507  
7.504  
7.490  
7.486  
7.472  
7.468  
7.453  
7.450  
7.361  
7.357  
7.340  
7.264  
7.245  
7.225  
6.902  
6.882  
6.854  
6.848  
6.844  
6.784  
6.779  
6.764  
6.759  
4.346  
4.328  
4.310  
4.292  
3.795  
1.766  
1.748

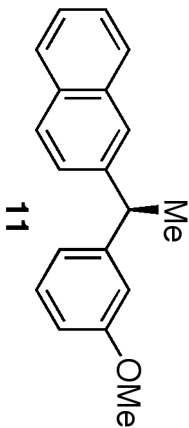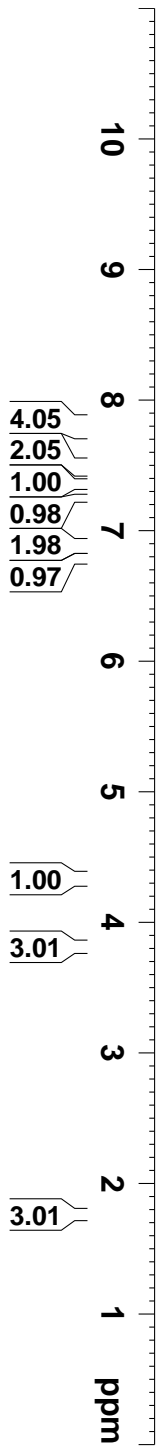

Current Data Parameters  
NAME HH-4-050A  
EXPNO 1  
PROCNO 1

F2 - Acquisition Parameters  
Date\_ 20121115  
Time 16.38

INSTRUM spect  
PROBHD 5 mm GPQNP 1H/  
PULPROG zg30

TD 65536  
SOLVENT CDCl3  
NS 16  
DS 2

SWH 8278.146 Hz  
FIDRES 0.126314 Hz  
AQ 3.9584243 sec

RG 9  
DW 60.400 usec  
DE 6.00 usec

TE 298.1 K  
D1 1.00000000 sec  
TD0 1

==== CHANNEL f1 =====  
NUC1 1H

P1 15.00 usec  
PL1 4.90 dB  
PL1W 3.30822015 W

SFO1 400.1324710 MHz

F2 - Processing parameters  
SI 32768  
SF 400.1300000 MHz

WDW EM  
SSB 0  
LB 0.30 Hz

GB 0  
PC 1.00

Compound 11 13C NMR

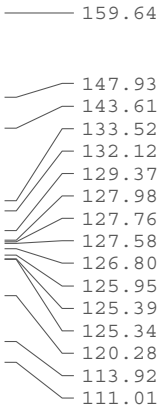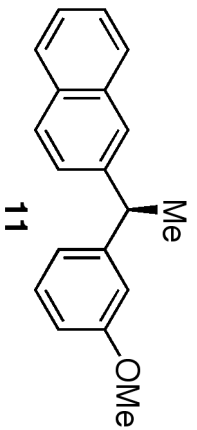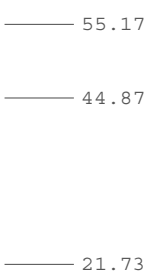

Current Data Parameters  
 NAME HH-4-050A  
 EXPNO 2  
 PROCNO 1

F2 - Acquisition Parameters  
 Date\_ 20121115  
 Time\_ 23.39

INSTRUM spect  
 PROBHD 5 mm CPQNP 1H/  
 PULPROG zgpg30  
 TD 65536  
 SOLVENT CDCl3  
 NS 256  
 DS 4  
 SWH 23980.814 Hz  
 FIDRES 0.365918 Hz  
 AQ 1.3664756 sec  
 RG 512  
 DW 20.850 usec  
 DE 18.00 usec  
 TE 298.2 K  
 D1 2.00000000 sec  
 D11 0.03000000 sec  
 TD0 1

==== CHANNEL F1 =====  
 NUC1 13C  
 P1 9.25 usec  
 PL1 0.55 dB  
 PL1W 35.18820572 W  
 SFO1 100.6228298 MHz

==== CHANNEL F2 =====  
 CPDPRG2 waltz16  
 NUC2 1H  
 PCPD2 90.00 usec  
 PL2 4.90 dB  
 PL12 20.46 dB  
 PL13 21.00 dB  
 PL2W 3.30822015 W  
 PL12W 0.09195905 W  
 PL13W 0.08120718 W  
 SFO2 400.1316005 MHz

F2 - Processing parameters  
 SI 32768  
 SF 100.6127690 MHz  
 WDW EM  
 SSB 0  
 LB 1.00 Hz  
 GB 0  
 PC 1.40



Compound 12 1H NMR



- 7.849
- 7.839
- 7.829
- 7.804
- 7.783
- 7.728
- 7.525
- 7.511
- 7.507
- 7.494
- 7.493
- 7.489
- 7.475
- 7.472
- 7.339
- 7.335
- 7.318
- 7.313
- 7.306
- 7.290
- 7.284
- 7.271
- 7.266
- 7.251
- 7.085
- 7.066
- 7.013
- 7.008
- 7.004
- 6.987
- 6.982
- 6.978
- 6.947
- 6.941
- 6.926
- 6.920
- 6.905
- 6.904
- 4.353
- 4.335
- 1.771
- 1.753

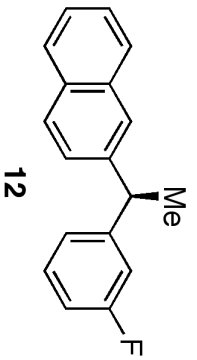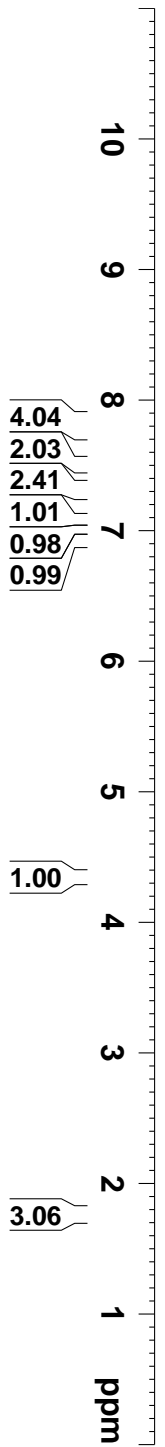

Current Data Parameters  
 NAME HH-4-51 B  
 EXPNO 1  
 PROCNO 1

F2 - Acquisition Parameters  
 Date\_ 20121117  
 Time\_ 4.31  
 INSTRUM spect  
 PROBHD 5 mm GPQNP 1H/  
 PULPROG zg30  
 TD 65536  
 SOLVENT CDCl3  
 NS 16  
 DS 2  
 SWH 8278.146 Hz  
 FIDRES 0.126314 Hz  
 AQ 3.9584243 sec  
 RG 11.3  
 DW 60.400 usec  
 DE 6.00 usec  
 TE 298.1 K  
 D1 1.00000000 sec  
 TD0 1

==== CHANNEL f1 =====  
 NUC1 1H  
 P1 15.00 usec  
 PL1 4.90 dB  
 PL1W 3.30822015 W  
 SFO1 400.1324710 MHz

F2 - Processing parameters  
 SI 32768  
 SF 400.1300000 MHz  
 WDW EM  
 SSB 0  
 LB 0.30 Hz  
 GB 0  
 PC 1.00

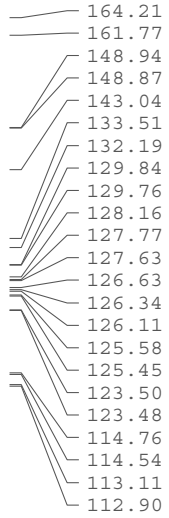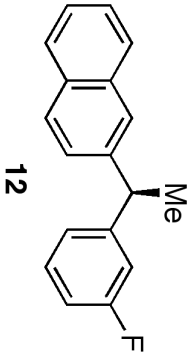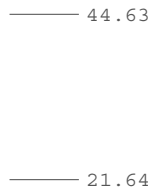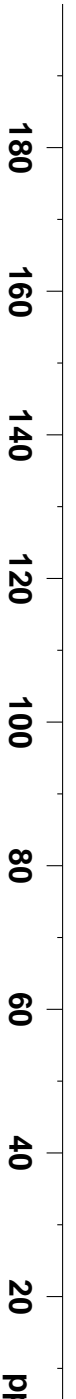

```

Current Data Parameters
NAME          HH-4-51 B
EXPNO        2
PROCNO       1

F2 - Acquisition Parameters
Date_        20121117
Time         4.47
INSTRUM      spect
PROBHD       5 mm CPQNP 1H/
PULPROG      zgpg30
TD           65536
SOLVENT      CDCl3
NS           256
DS           4
SWH          23980.814 Hz
FIDRES       0.365918 Hz
AQ           1.3664756 sec
RG           512
DE           20.850 usec
TE           298.2 K
D1           2.00000000 sec
D11          0.03000000 sec
TD0          1

===== CHANNEL F1 =====
NUC1          13C
P1           9.25 usec
PL1          0.55 dB
PL1W         35.18820572 W
SF01         100.6228298 MHz

===== CHANNEL F2 =====
CPDPRG2      waltz16
NUC2          1H
PCPD2        90.00 usec
PL2          4.90 dB
PL12         20.46 dB
PL13         21.00 dB
PL12W        3.30822015 W
PL12W        0.09195905 W
PL13W        0.08120718 W
SF02         400.1316005 MHz

F2 - Processing parameters
SI           32768
WDW          EM
SSB          0
LB           1.00 Hz
GB           0
PC           1.40
  
```

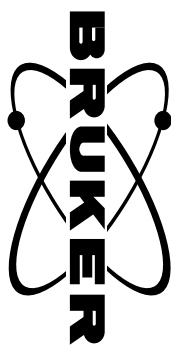

Compound 13 1H NMR

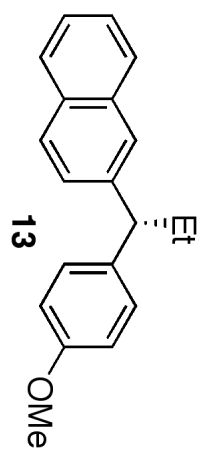

|       |       |
|-------|-------|
| 7.813 | 0.961 |
| 7.795 | 0.942 |
| 7.776 | 0.924 |
| 7.755 |       |
| 7.734 |       |
| 7.699 |       |
| 7.461 |       |
| 7.457 |       |
| 7.441 |       |
| 7.440 |       |
| 7.437 |       |
| 7.420 |       |
| 7.417 |       |
| 7.341 |       |
| 7.337 |       |
| 7.319 |       |
| 7.315 |       |
| 7.215 |       |
| 7.193 |       |
| 6.848 |       |
| 6.826 |       |
| 3.941 |       |
| 3.922 |       |
| 3.903 |       |
| 3.780 |       |
| 2.180 |       |
| 2.162 |       |
| 2.146 |       |
| 2.127 |       |
| 0.961 |       |
| 0.942 |       |
| 0.924 |       |

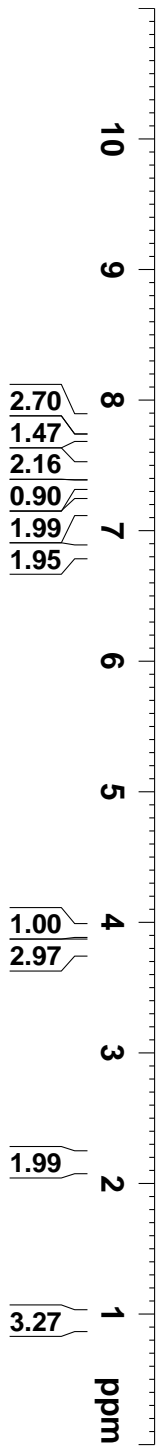

Current Data Parameters  
 NAME SDG-2-164A  
 EXPNO 1  
 PROCNO 1

F2 - Acquisition Parameters  
 Date\_ 20121118  
 Time\_ 6.09  
 INSTRUM spect  
 PROBHD 5 mm GPQNP 1H/  
 PULPROG zg30  
 TD 65536  
 SOLVENT CDCl3  
 NS 100  
 DS 2  
 SWH 8278.146 Hz  
 FIDRES 0.126314 Hz  
 AQ 3.9584243 sec  
 RG 9  
 DW 60.400 usec  
 DE 6.00 usec  
 TE 298.2 K  
 D1 1.00000000 sec  
 TD0 1

==== CHANNEL f1 =====  
 NUC1 1H  
 P1 15.00 usec  
 PL1 4.90 dB  
 PL1W 3.30822015 W  
 SFO1 400.1324710 MHz

F2 - Processing parameters  
 SI 32768  
 SF 400.1300049 MHz  
 WDW EM  
 SSB 0  
 LB 0.30 Hz  
 GB 0  
 PC 1.00

Compound 13 <sup>13</sup>CNMR

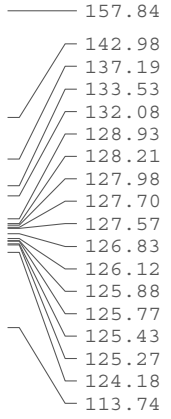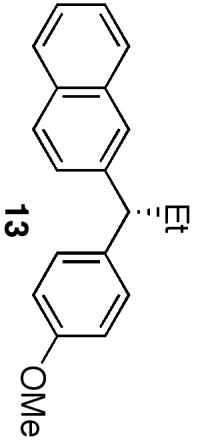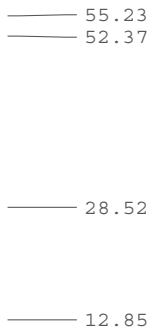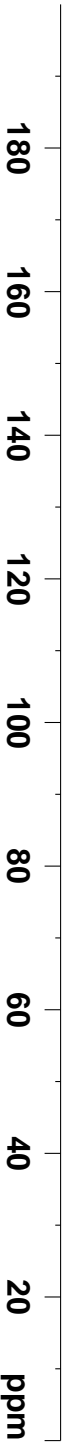

Current Data Parameters  
 NAME SDG-2-164A  
 EXPNO 2  
 PROCNO 1

F2 - Acquisition Parameters  
 Date\_ 20121118  
 Time\_ 7.09

INSTRUM spect  
 PROBHD 5 mm CPQNP 1H/  
 PULPROG zgpg30  
 TD 65536  
 SOLVENT CDCl3  
 NS 1024  
 DS 4  
 SWH 23980.814 Hz  
 FIDRES 0.365918 Hz  
 AQ 1.3664756 sec  
 RG 512  
 DW 20.850 usec  
 DE 18.00 usec  
 TE 298.1 K  
 D1 2.00000000 sec  
 D11 0.03000000 sec  
 TD0 1

==== CHANNEL F1 =====  
 NUC1 13C  
 P1 9.25 usec  
 PL1 0.55 dB  
 PL1W 35.18820572 W  
 SFO1 100.6228298 MHz

==== CHANNEL F2 =====  
 CPDPRG2 waltz16  
 NUC2 1H  
 PCPD2 90.00 usec  
 PL2 4.90 dB  
 PL12 20.46 dB  
 PL13 21.00 dB  
 PL2W 3.30822015 W  
 PL12W 0.09195905 W  
 PL13W 0.08120718 W  
 SFO2 400.1316005 MHz

F2 - Processing parameters  
 SI 32768  
 SF 100.6127690 MHz  
 WDW EM  
 SSB 0  
 LB 1.00 Hz  
 GB 0  
 PC 1.40

Compound 14 1H NMR



- 7.841
- 7.822
- 7.802
- 7.783
- 7.762
- 7.747
- 7.504
- 7.500
- 7.487
- 7.483
- 7.467
- 7.462
- 7.446
- 7.443
- 7.429
- 7.426
- 7.383
- 7.378
- 7.362
- 7.357
- 7.322
- 7.311
- 7.284
- 7.229
- 7.217
- 7.207
- 7.197
- 4.015
- 3.996
- 3.977
- 2.258
- 2.239
- 2.229
- 2.221
- 2.210
- 2.202
- 2.184
- 2.174
- 0.995
- 0.977
- 0.959

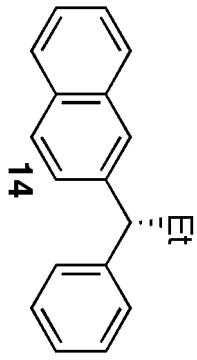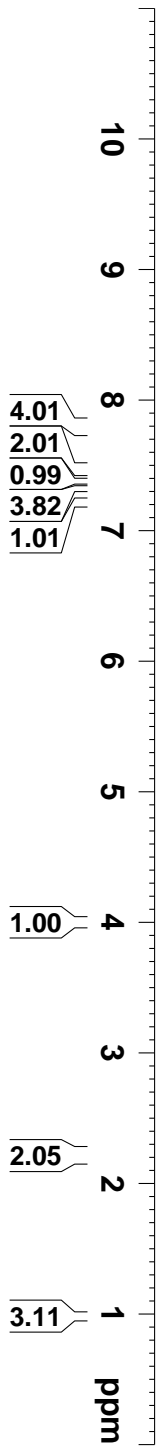

Current Data Parameters  
 NAME SDG-2-165-1  
 EXPNO 1  
 PROCNO 1

F2 - Acquisition Parameters  
 Date\_ 20121115  
 Time\_ 16.14  
 INSTRUM spect  
 PROBHD 5 mm GPQNP 1H/  
 PULPROG zg30  
 TD 65536  
 SOLVENT CDCl3  
 NS 16  
 DS 2  
 SWH 8278.146 Hz  
 FIDRES 0.126314 Hz  
 AQ 3.9584243 sec  
 RG 9  
 DW 60.400 usec  
 DE 6.00 usec  
 TE 298.2 K  
 D1 1.00000000 sec  
 TD0 1

==== CHANNEL f1 =====  
 NUC1 1H  
 P1 15.00 usec  
 PL1 4.90 dB  
 PL1W 3.30822015 W  
 SFO1 400.1324710 MHz

F2 - Processing parameters  
 SI 32768  
 SF 400.1300000 MHz  
 WDW EM  
 SSB 0  
 LB 0.30 Hz  
 GB 0  
 PC 1.00



- 145.05
- 142.59
- 133.53
- 132.13
- 128.41
- 128.06
- 128.01
- 127.73
- 127.58
- 126.87
- 126.12
- 125.95
- 125.92
- 125.34

- 53.26
- 28.39
- 12.86

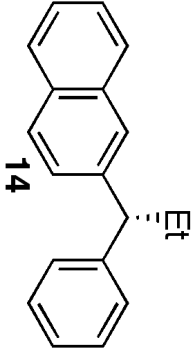

Current Data Parameters  
 NAME SDG-2-165-1  
 EXPNO 2  
 PROCNO 1

F2 - Acquisition Parameters  
 Date\_ 20121115  
 Time 22.41

INSTRUM spect  
 PROBHD 5 mm CPQNP 1H/  
 PULPROG zgpg30  
 TD 65536  
 SOLVENT CDCl3  
 NS 256  
 DS 4

SWH 23980.814 Hz  
 FIDRES 0.365918 Hz  
 AQ 1.3664756 sec

RG 512  
 DW 20.850 usec  
 DE 18.00 usec  
 TE 298.1 K  
 D1 2.00000000 sec  
 D11 0.03000000 sec  
 TD0 1

==== CHANNEL F1 =====  
 NUC1 13C

P1 9.25 usec  
 PL1 0.55 dB  
 PL1W 35.18820572 W  
 SFO1 100.6228298 MHz

==== CHANNEL F2 =====  
 CPDPRG2 waltz16

NUC2 1H  
 PCPPD2 90.00 usec  
 PL2 4.90 dB  
 PL12 20.46 dB  
 PL13 21.00 dB  
 PL2W 3.30822015 W  
 PL12W 0.09195905 W  
 PL13W 0.08120718 W  
 SFO2 400.1316005 MHz

F2 - Processing parameters  
 SI 32768  
 SF 100.6127690 MHz  
 WDW EM  
 SSB 0  
 LB 1.00 Hz  
 GB 0  
 PC 1.40

Compound 15 1H NMR

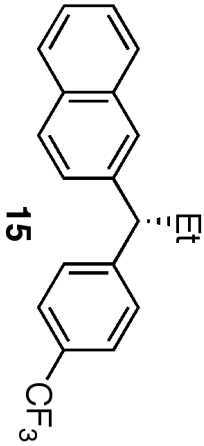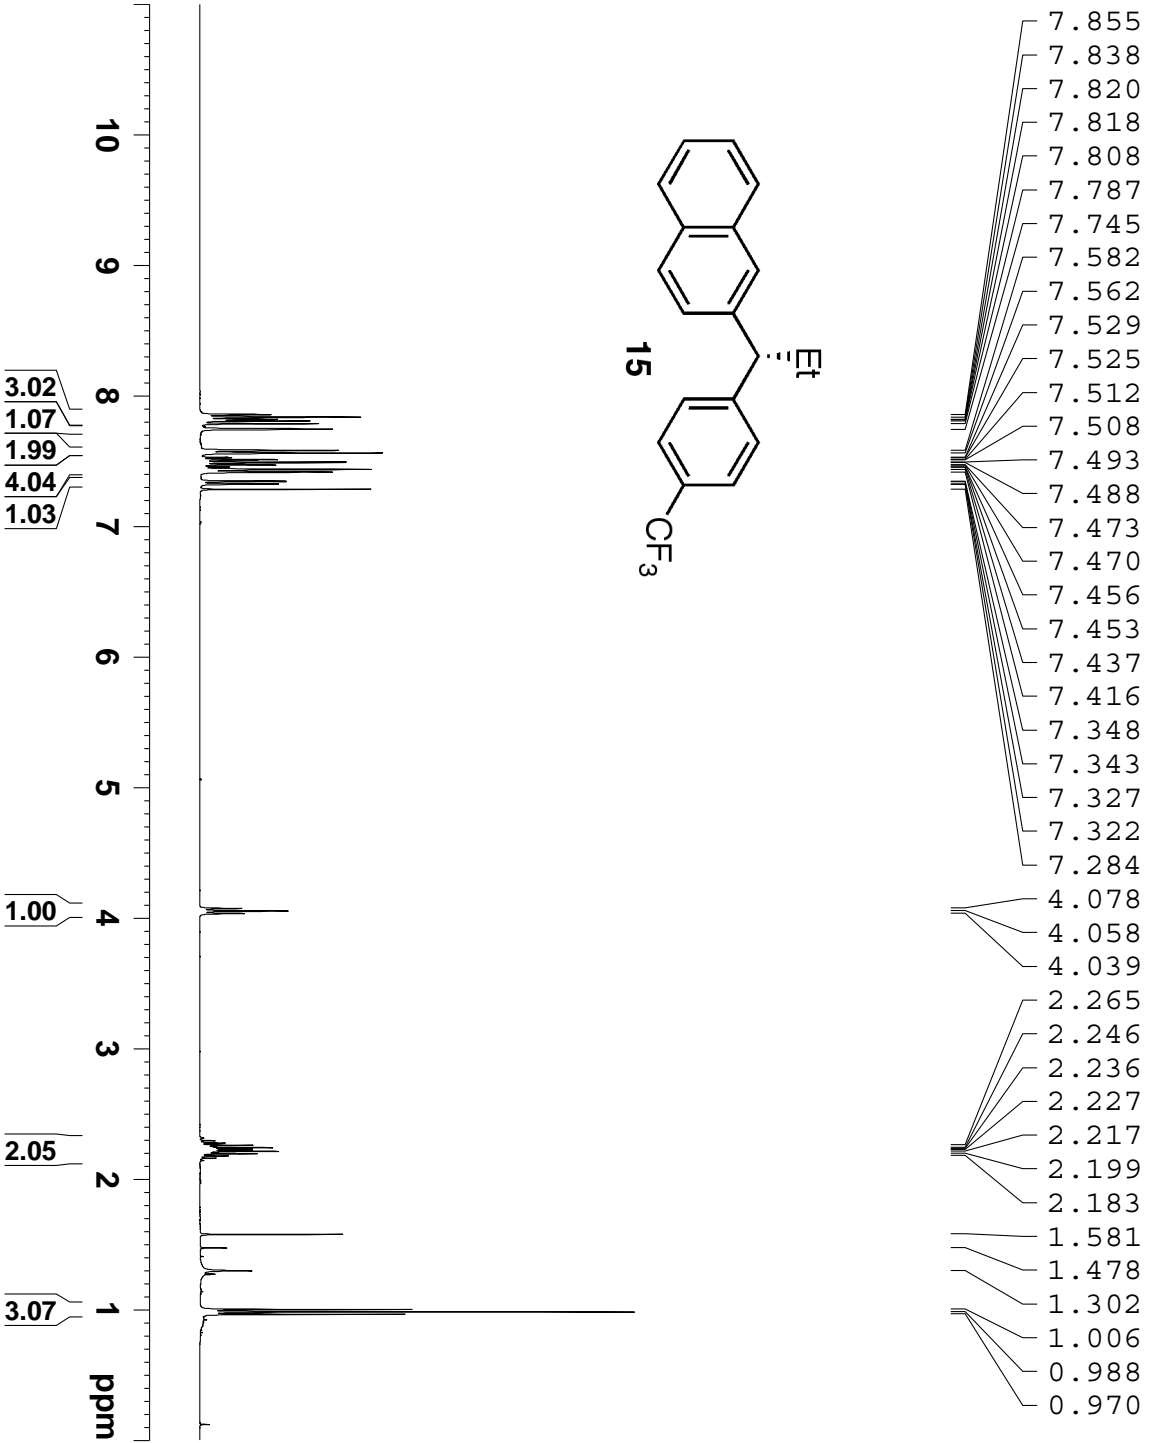

- 7.855
- 7.838
- 7.820
- 7.818
- 7.808
- 7.787
- 7.745
- 7.582
- 7.562
- 7.529
- 7.525
- 7.512
- 7.508
- 7.493
- 7.488
- 7.473
- 7.470
- 7.456
- 7.453
- 7.437
- 7.416
- 7.348
- 7.343
- 7.327
- 7.322
- 7.284
- 4.078
- 4.058
- 4.039
- 2.265
- 2.246
- 2.236
- 2.227
- 2.217
- 2.199
- 2.183
- 1.581
- 1.478
- 1.302
- 1.006
- 0.988
- 0.970

Current Data Parameters  
 NAME HH-4-52  
 EXPNO 1  
 PROCNO 1

F2 - Acquisition Parameters

Date\_ 20121117  
 Time\_ 4.53  
 INSTRUM spect  
 PROBHD 5 mm GPQNP 1H/  
 PULPROG zg30  
 TD 65536  
 SOLVENT CDCl3  
 NS 16  
 DS 2  
 SWH 8278.146 Hz  
 FIDRES 0.126314 Hz  
 AQ 3.9584243 sec  
 RG 12.7  
 DW 60.400 usec  
 DE 6.00 usec  
 TE 298.1 K  
 D1 1.00000000 sec  
 TD0 1

==== CHANNEL f1 =====

NUC1 1H  
 P1 15.00 usec  
 PL1 4.90 dB  
 PL1W 3.30822015 W  
 SFO1 400.1324710 MHz

F2 - Processing parameters

SI 32768  
 SF 400.1300000 MHz  
 WDW EM  
 SSB 0  
 LB 0.30 Hz  
 GB 0  
 PC 1.00

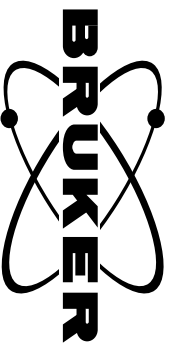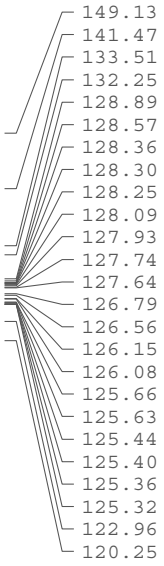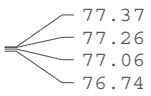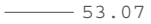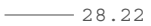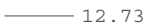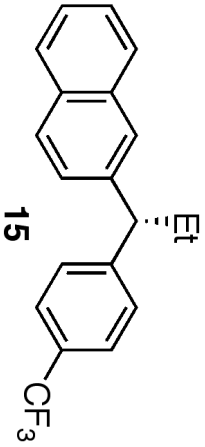

Current Data Parameters  
 NAME HH-4-52  
 EXPNO 2  
 PROCNO 1

F2 - Acquisition Parameters  
 Date\_ 20121117  
 Time\_ 5.09

INSTRUM spect  
 PROBHD 5 mm CPQNP 1H/  
 PULPROG zgpg30  
 TD 65536  
 SOLVENT CDCl3  
 NS 256  
 DS 4  
 SWH 23980.814 Hz  
 FIDRES 0.365918 Hz  
 AQ 1.3664756 sec  
 RG 512  
 DW 20.850 usec  
 DE 18.00 usec  
 TE 298.2 K  
 D1 2.00000000 sec  
 D11 0.03000000 sec  
 TD0 1

==== CHANNEL F1 =====  
 NUC1 13C  
 P1 9.25 usec  
 PL1 0.55 dB  
 PL1W 35.18820572 W  
 SFO1 100.6228298 MHz

==== CHANNEL F2 =====  
 CPDPRG2 waltz16  
 NUC2 1H  
 PCPD2 90.00 usec  
 PL2 4.90 dB  
 PL12 20.46 dB  
 PL13 21.00 dB  
 PL2W 3.30822015 W  
 PL12W 0.09195905 W  
 PL13W 0.08120718 W  
 SFO2 400.1316005 MHz

F2 - Processing parameters  
 SI 32768  
 SF 100.6127690 MHz  
 WDW EM  
 SSB 0  
 LB 1.00 Hz  
 GB 0  
 PC 1.40



Compound 16 1HNMR

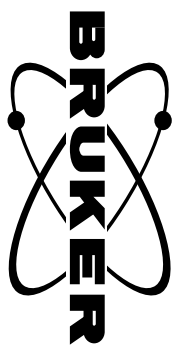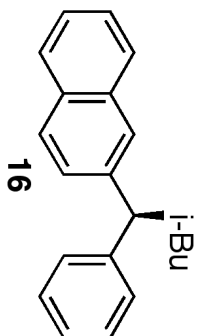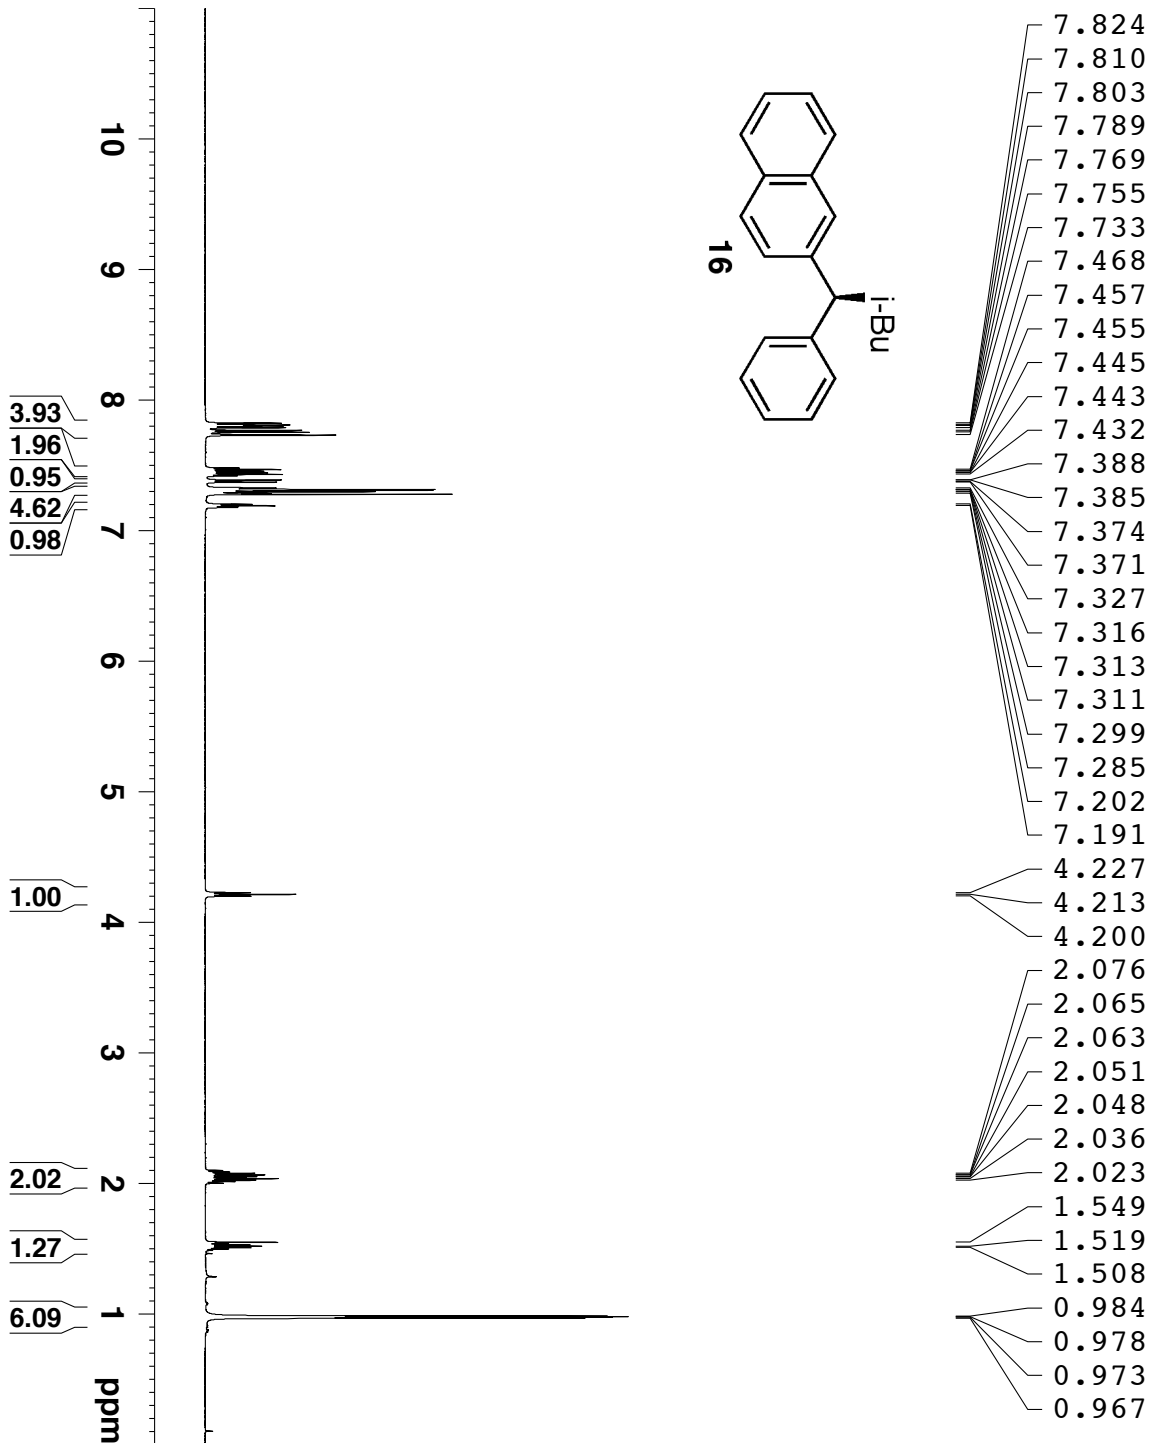

Current Data Parameters  
 NAME HH-4-087B  
 EXPNO 1  
 PROCNO 1

F2 - Acquisition Parameters  
 Date\_ 20121129  
 Time\_ 11.12  
 INSTRUM spect  
 PROBHD 5 mm PABBO BB-  
 PULPROG zg30  
 TD 65536  
 SOLVENT CDCl3  
 NS 8  
 DS 2  
 SWH 8403.361 Hz  
 FIDRES 0.128225 Hz  
 AQ 3.8994420 sec  
 RG 256  
 DW 59.500 usec  
 DE 9.10 usec  
 TE 298.1 K  
 D1 1.00000000 sec  
 TD0 1

==== CHANNEL f1 =====  
 SF01 600.3233018 MHz  
 NUC1 1H  
 P1 14.80 usec

F2 - Processing parameters  
 SI 65536  
 SF 600.3200044 MHz  
 WDW EM  
 SSB 0  
 LB 0.30 Hz  
 GB 0  
 PC 1.00



145.18  
142.73  
133.56  
132.13  
128.42  
128.02  
128.01  
127.70  
127.57  
126.83  
126.08  
125.90  
125.89  
125.32

48.91  
44.80

25.57  
22.77  
22.64

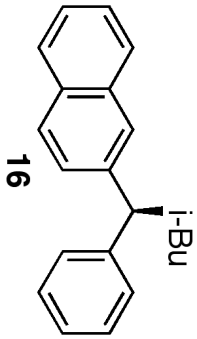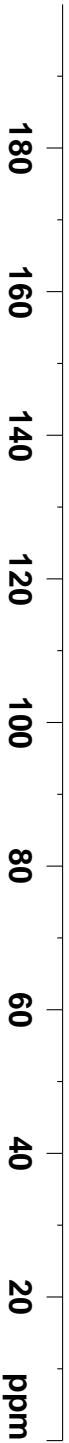

Current Data Parameters  
NAME HH-4-087B  
EXPNO 2  
PROCNO 1

F2 - Acquisition Parameters  
Date\_ 20121129  
Time\_ 11.22  
INSTRUM spect  
PROBHD 5 mm PABBO BB-  
PULPROG zgpg55  
TD 65536  
SOLVENT CDCl3  
NS 256  
DS 4  
SWH 34722.223 Hz  
FIDRES 0.529819 Hz  
AQ 0.9437684 sec  
RG 2050  
DW 14.400 usec  
DE 8.88 usec  
TE 298.1 K  
D1 1.10000002 sec  
D11 0.03000000 sec  
TD0 1

==== CHANNEL f1 =====  
SFO1 150.9656784 MHz  
NUC1 13C  
P1 9.00 usec

F2 - Processing parameters  
SI 32768  
SF 150.9505840 MHz  
WDW EM  
SSB 0  
LB 1.00 Hz  
GB 0  
PC 1.40

Compound 17 1H NMR



- 7.841
- 7.833
- 7.826
- 7.817
- 7.796
- 7.774
- 7.750
- 7.742
- 7.735
- 7.727
- 7.489
- 7.472
- 7.464
- 7.456
- 7.448
- 7.345
- 7.341
- 7.337
- 7.327
- 7.324
- 7.320
- 7.315
- 7.312
- 7.309
- 7.277
- 7.274
- 7.270
- 7.261
- 7.255
- 7.237
- 7.196
- 7.193
- 7.175
- 7.112
- 7.091
- 6.888
- 6.881
- 6.876
- 6.864
- 6.859
- 5.693
- 3.822

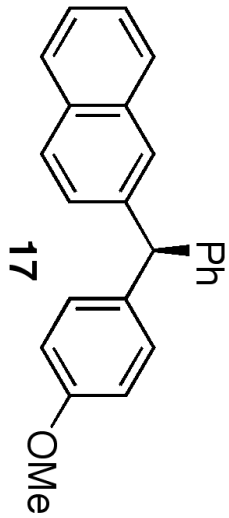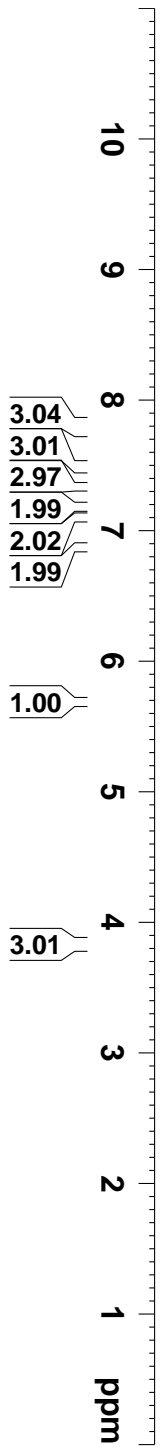

Current Data Parameters  
 NAME HH-4-082A  
 EXPNO 1  
 PROCNO 1

F2 - Acquisition Parameters  
 Date\_ 20121122  
 Time\_ 18.07  
 INSTRUM spect  
 PROBHD 5 mm GPQNP 1H/  
 PULPROG zg30  
 TD 65536  
 SOLVENT CDCl3  
 NS 16  
 DS 2  
 SWH 8278.146 Hz  
 FIDRES 0.126314 Hz  
 AQ 3.9584243 sec  
 RG 4  
 DW 60.400 usec  
 DE 6.00 usec  
 TE 298.2 K  
 D1 1.00000000 sec  
 TD0 1

==== CHANNEL f1 =====  
 NUC1 1H  
 P1 15.00 usec  
 PL1 4.90 dB  
 PL1W 3.30822015 W  
 SFO1 400.1324710 MHz

F2 - Processing parameters  
 SI 32768  
 SF 400.1300000 MHz  
 WDW EM  
 SSB 0  
 LB 0.30 Hz  
 GB 0  
 PC 1.00

Compound 17 <sup>13</sup>CNMR

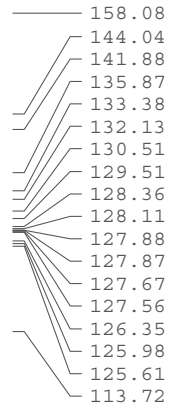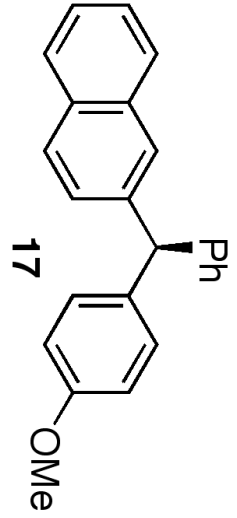

Current Data Parameters  
 NAME HH-4-082A  
 EXPNO 2  
 PROCNO 1

F2 - Acquisition Parameters  
 Date\_ 20121122  
 Time\_ 18.28

INSTRUM spect  
 PROBHD 5 mm CPQNP 1H/  
 PULPROG zgpg30  
 TD 65536  
 SOLVENT CDCl3  
 NS 256  
 DS 4

SWH 23980.814 Hz  
 FIDRES 0.365918 Hz  
 AQ 1.3664756 sec  
 RG 512  
 DW 20.850 usec  
 DE 18.00 usec  
 TE 298.1 K  
 D1 2.00000000 sec  
 D11 0.03000000 sec  
 TD0 1

==== CHANNEL F1 =====  
 NUC1 13C  
 P1 9.25 usec  
 PL1 0.55 dB  
 PL1W 35.18820572 W  
 SFO1 100.6228298 MHz

==== CHANNEL F2 =====  
 CPDPRG2 waltz16  
 NUC2 1H  
 PCPD2 90.00 usec  
 PL2 4.90 dB  
 PL12 20.46 dB  
 PL13 21.00 dB  
 PL2W 3.30822015 W  
 PL12W 0.09195905 W  
 PL13W 0.08120718 W  
 SFO2 400.1316005 MHz

F2 - Processing parameters  
 SI 32768  
 SF 100.6127690 MHz  
 WDW EM  
 SSB 0  
 LB 1.00 Hz  
 GB 0  
 PC 1.40



Compound 18 1H NMR

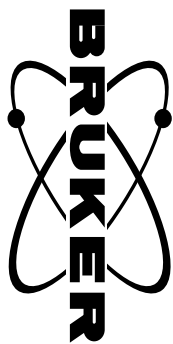

- 7.755
- 7.746
- 7.744
- 7.739
- 7.734
- 7.588
- 7.574
- 7.500
- 7.496
- 7.489
- 7.484
- 7.482
- 7.476
- 7.473
- 7.465
- 7.461
- 7.361
- 7.358
- 7.349
- 7.336
- 7.316
- 7.308
- 7.302
- 7.293
- 7.290
- 7.286
- 7.280
- 7.267
- 7.177
- 7.165
- 5.783

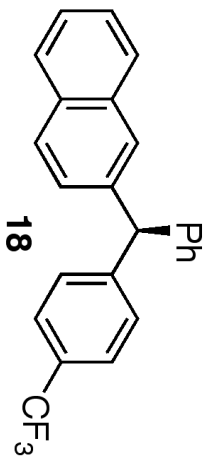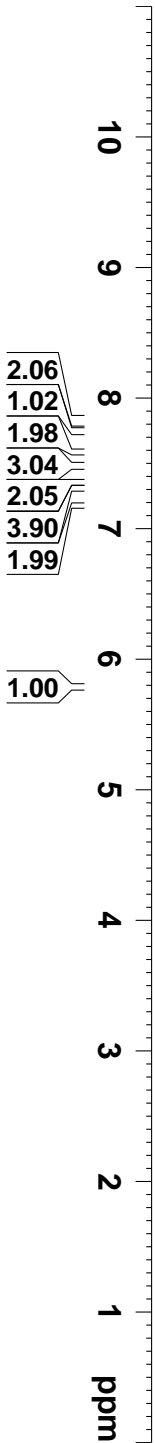

Current Data Parameters  
 NAME QZ-3-139rs  
 EXPNO 1  
 PROCNO 1

F2 - Acquisition Parameters  
 Date\_ 20121130  
 Time\_ 11.35  
 INSTRUM spect  
 PROBHD 5 mm PABBO BB-  
 PULPROG zg30  
 TD 65536  
 SOLVENT CDCl3  
 NS 8  
 DS 2  
 SWH 8403.361 Hz  
 FIDRES 0.128225 Hz  
 AQ 3.8994420 sec  
 RG 256  
 DW 59.500 usec  
 DE 9.10 usec  
 TE 298.1 K  
 D1 1.00000000 sec  
 TD0 1

==== CHANNEL f1 =====  
 SFO1 600.3233018 MHz  
 NUC1 1H  
 P1 14.80 usec

F2 - Processing parameters  
 SI 65536  
 SF 600.3200039 MHz  
 WDW EM  
 SSB 0  
 LB 0.30 Hz  
 GB 0  
 PC 1.00

Compound 18 <sup>13</sup>CNMR



- 147.83
- 142.76
- 140.52
- 133.39
- 132.28
- 129.89
- 129.68
- 129.51
- 129.08
- 128.87
- 128.65
- 128.60
- 128.52
- 128.44
- 128.20
- 128.10
- 127.89
- 127.88
- 127.79
- 127.61
- 126.96
- 126.81
- 126.23
- 125.93
- 125.38
- 125.36
- 125.33
- 125.30
- 125.16
- 123.36
- 121.56

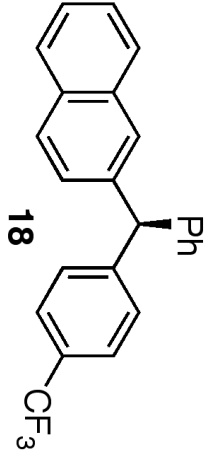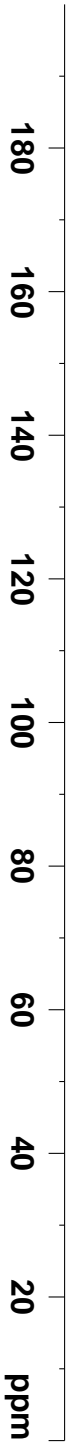

Current Data Parameters  
 NAME QZ-3-139 3rd tim  
 EXPNO 2  
 PROCNO 1

F2 - Acquisition Parameters  
 Date\_ 20121210  
 Time\_ 18.42  
 INSTRUM spect  
 PROBHD 5 mm PABBO BB/  
 PULPROG zgpg55  
 TD 65536  
 SOLVENT CDCl3  
 NS 1024  
 DS 4  
 SWH 34722.223 Hz  
 FIDRES 0.529819 Hz  
 AQ 0.9437684 sec  
 RG 2050  
 DW 14.400 usec  
 DE 19.34 usec  
 TE 298.1 K  
 D1 2.50000000 sec  
 D11 0.03000000 sec  
 TD0 1

==== CHANNEL f1 =====  
 SF01 150.9656784 MHz  
 NUC1 13C  
 P1 10.63 usec  
 F2 - Processing parameters  
 SI 32768  
 SF 150.9505840 MHz  
 WDW EM  
 SSB 0  
 LB 1.00 Hz  
 GB 0  
 PC 1.40

Compound 19 1H NMR

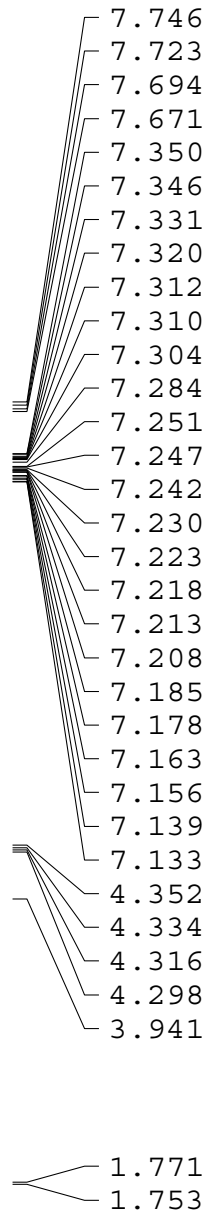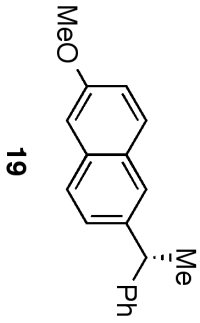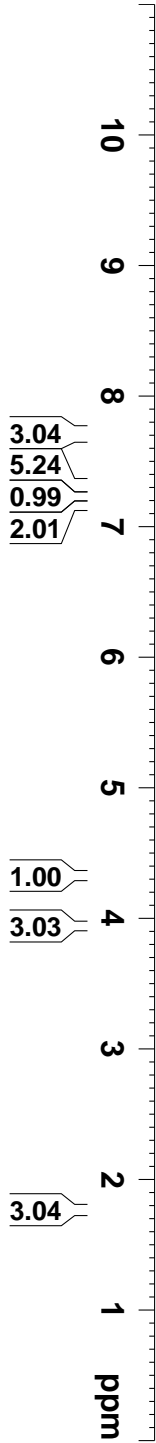

Current Data Parameters  
 NAME SDG-2-167-1  
 EXPNO 1  
 PROCNO 1

F2 - Acquisition Parameters  
 Date\_ 20121115  
 Time\_ 16.02  
 INSTRUM spect  
 PROBHD 5 mm GPQNP 1H/  
 PULPROG zg30  
 TD 65536  
 SOLVENT CDCl3  
 NS 16  
 DS 2  
 SWH 8278.146 Hz  
 FIDRES 0.126314 Hz  
 AQ 3.9584243 sec  
 RG 8  
 DW 60.400 usec  
 DE 6.00 usec  
 TE 298.2 K  
 D1 1.00000000 sec  
 TD0 1

==== CHANNEL f1 =====  
 NUC1 1H  
 P1 15.00 usec  
 PL1 4.90 dB  
 PL1W 3.30822015 W  
 SFO1 400.1324710 MHz

F2 - Processing parameters  
 SI 32768  
 SF 400.1300000 MHz  
 WDW EM  
 SSB 0  
 LB 0.30 Hz  
 GB 0  
 PC 1.00

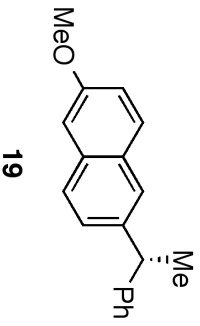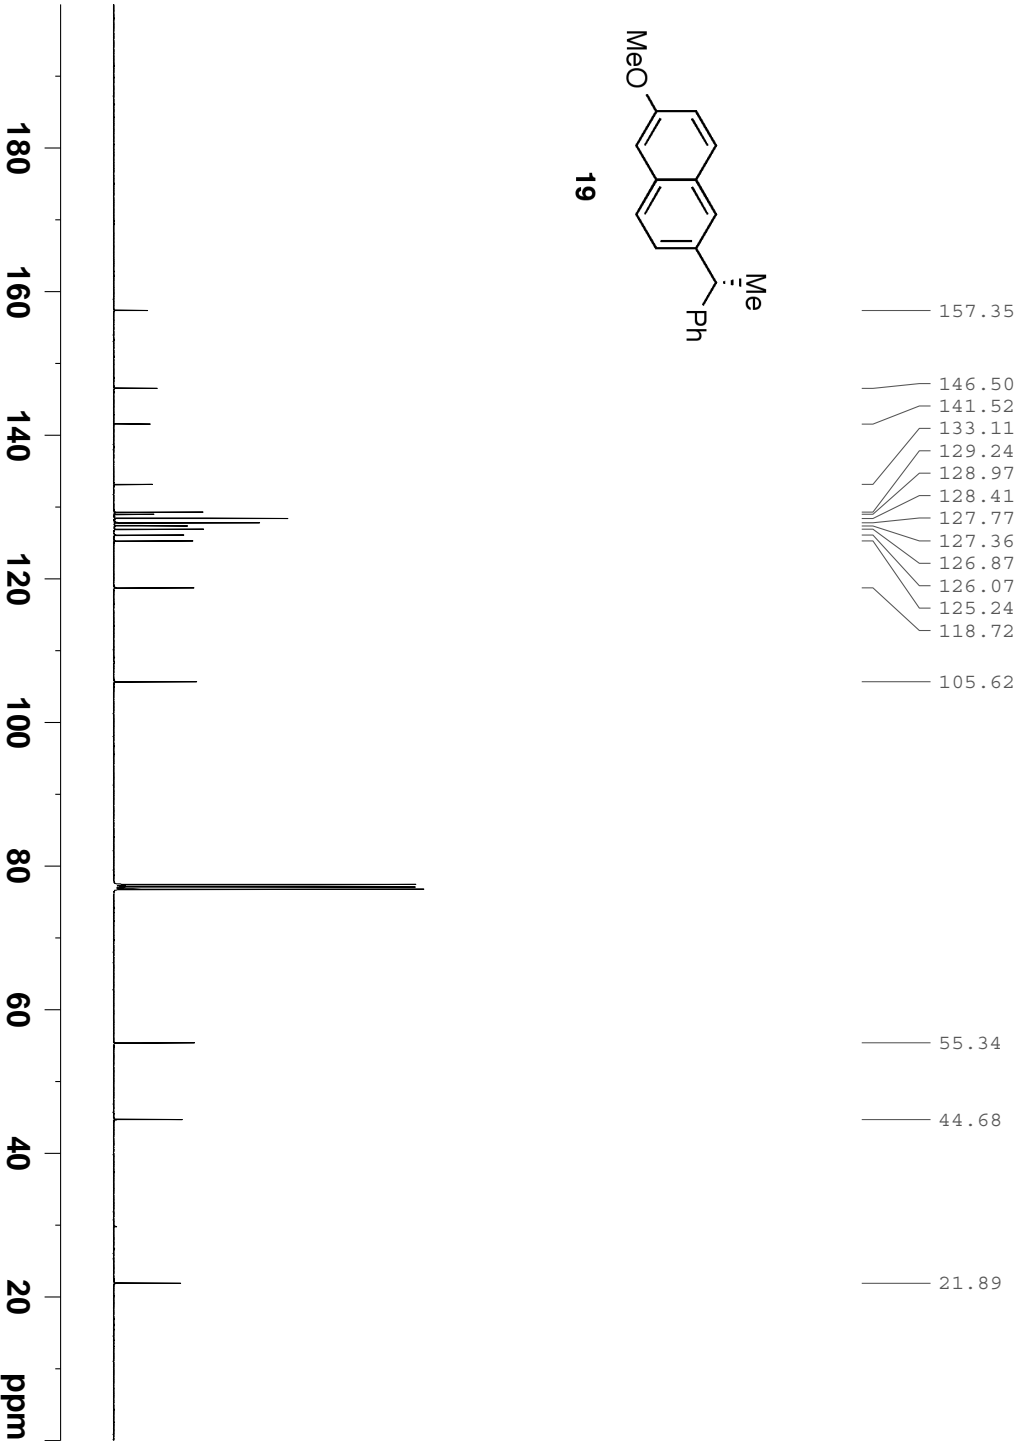

Current Data Parameters  
 NAME SDG-2-167-1  
 EXPNO 2  
 PROCNO 1

F2 - Acquisition Parameters  
 Date\_ 20121115  
 Time\_ 22.03  
 INSTRUM spect  
 PROBHD 5 mm CPQNP 1H/  
 PULPROG zgpg30  
 TD 65536  
 SOLVENT CDCl3  
 NS 256  
 DS 4  
 SWH 23980.814 Hz  
 FIDRES 0.365918 Hz  
 AQ 1.3664756 sec  
 RG 512  
 DW 20.850 usec  
 DE 18.00 usec  
 TE 298.2 K  
 D1 2.00000000 sec  
 D11 0.03000000 sec  
 TD0 1

==== CHANNEL F1 =====  
 NUC1 13C  
 P1 9.25 usec  
 PL1 0.55 dB  
 PL1W 35.18820572 W  
 SFO1 100.6228298 MHz

==== CHANNEL F2 =====  
 CPDPRG2 waltz16  
 NUC2 1H  
 PCPD2 90.00 usec  
 PL2 4.90 dB  
 PL12 20.46 dB  
 PL13 21.00 dB  
 PL2W 3.30822015 W  
 PL12W 0.09195905 W  
 PL13W 0.08120718 W  
 SFO2 400.1316005 MHz

F2 - Processing parameters  
 SI 32768  
 SF 100.6127690 MHz  
 WDW EM  
 SSB 0  
 LB 1.00 Hz  
 GB 0  
 PC 1.40



compound 20 1H NMR

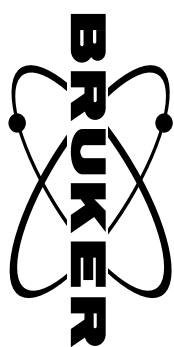

Current Data Parameters  
 NAME HH-4-143A  
 EXPNO 1  
 PROCNO 1

8.0552  
 8.0500  
 8.0460  
 8.0280  
 8.0250  
 7.8530  
 7.8390  
 7.8320  
 7.8180  
 7.7300  
 7.3880  
 7.3840  
 7.3670  
 7.3630  
 7.3240  
 7.3040  
 7.2870  
 7.2660  
 7.2490  
 7.2280  
 7.2250  
 7.2070  
 7.2020  
 7.1900  
 4.3600  
 4.3420  
 4.3240  
 4.3060  
 3.9710  
 1.7510  
 1.7330

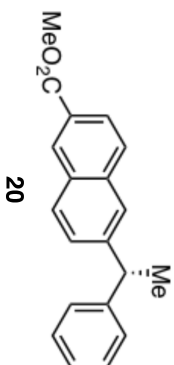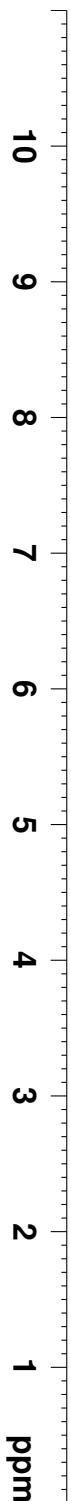

1.00  
 1.03  
 2.09  
 1.03  
 1.02  
 7.01

1.02  
 3.07

3.12

F2 - Acquisition Parameters  
 Date\_ 20130124  
 Time 14.48  
 INSTRUM spect  
 PROBHD 5 mm CPQNP 1H/  
 PULPROG zg30  
 TD 65536  
 SOLVENT CDCl3  
 NS 16  
 DS 2  
 SWH 8278.146 Hz  
 FIDRES 0.126314 Hz  
 AQ 3.9584243 sec  
 RG 9  
 DW 60.400 usec  
 DE 6.00 usec  
 TE 298.1 K  
 D1 1.0000000 sec  
 TD0 1

==== CHANNEL f1 ====  
 NUC1 1H  
 P1 15.00 usec  
 PL1 4.90 dB  
 PL1W 3.30822015 W  
 SFO1 400.1324710 MHz  
 F2 - Processing parameters  
 SI 32768  
 SF 400.1300104 MHz  
 WDW EM  
 SSB 0  
 LB 0.30 Hz  
 GB 0  
 PC 1.00

Compound 20 <sup>13</sup>C NMR

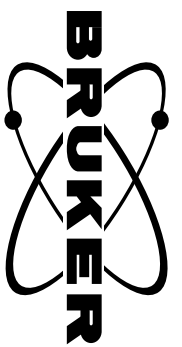

Current Data Parameters  
 NAME HH-4-143A  
 EXPNO 2  
 PROCNO 1

F2 - Acquisition Parameters  
 Date\_ 20130124  
 Time 23.45

INSTRUM spect  
 PROBRD 5 mm CPNP 1H/  
 PULPROG zgpg30  
 TD 65536  
 SOLVENT CDCl3  
 NS 1024  
 DS 4  
 SWH 23980.814 Hz  
 FIDRES 0.365918 Hz  
 AQ 1.3664756 sec  
 RG 512  
 DW 20.850 usec  
 DE 18.00 usec  
 TE 298.2 K  
 D1 2.0000000 sec  
 D11 0.0300000 sec  
 TDO 1

CHANNEL f1  
 NUC1 <sup>13</sup>C  
 P1 9.25 usec  
 PL1 0.55 dB  
 PL1W 35.18820572 W  
 SFO1 100.6228298 MHz

CHANNEL f2  
 CPDPRG2 waltz16  
 NUC2 <sup>1</sup>H  
 PCPD2 90.00 usec  
 PL2 4.90 dB  
 PL12 20.46 dB  
 PL13 21.00 dB  
 PL2W 3.308222015 W  
 PL12W 0.09195905 W  
 PL13W 0.08120718 W  
 SFO2 400.1316005 MHz

F2 - Processing parameters  
 S1 32768  
 SF 100.6127690 MHz  
 WDW EM  
 SSB 0  
 LB 1.00 Hz  
 GB 0  
 PC 1.40

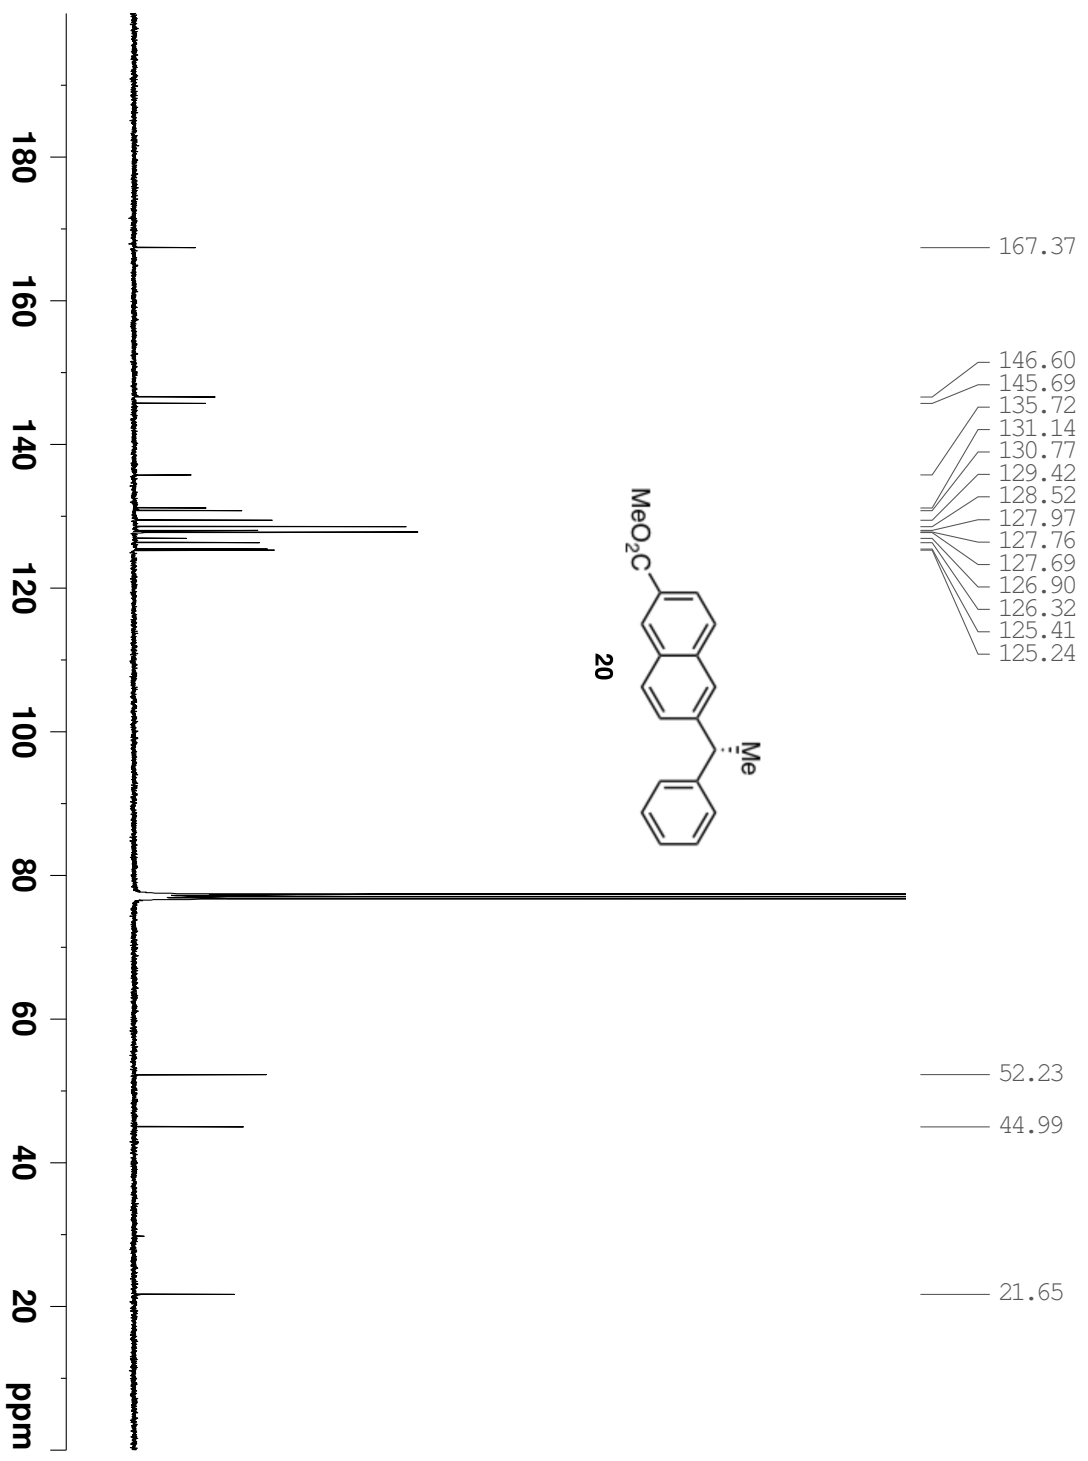

compound 21 1HNMR

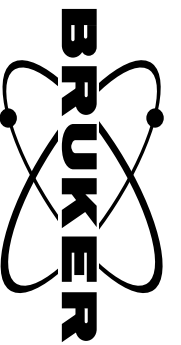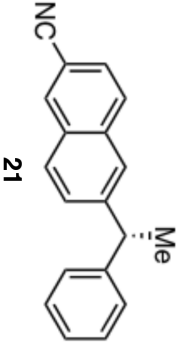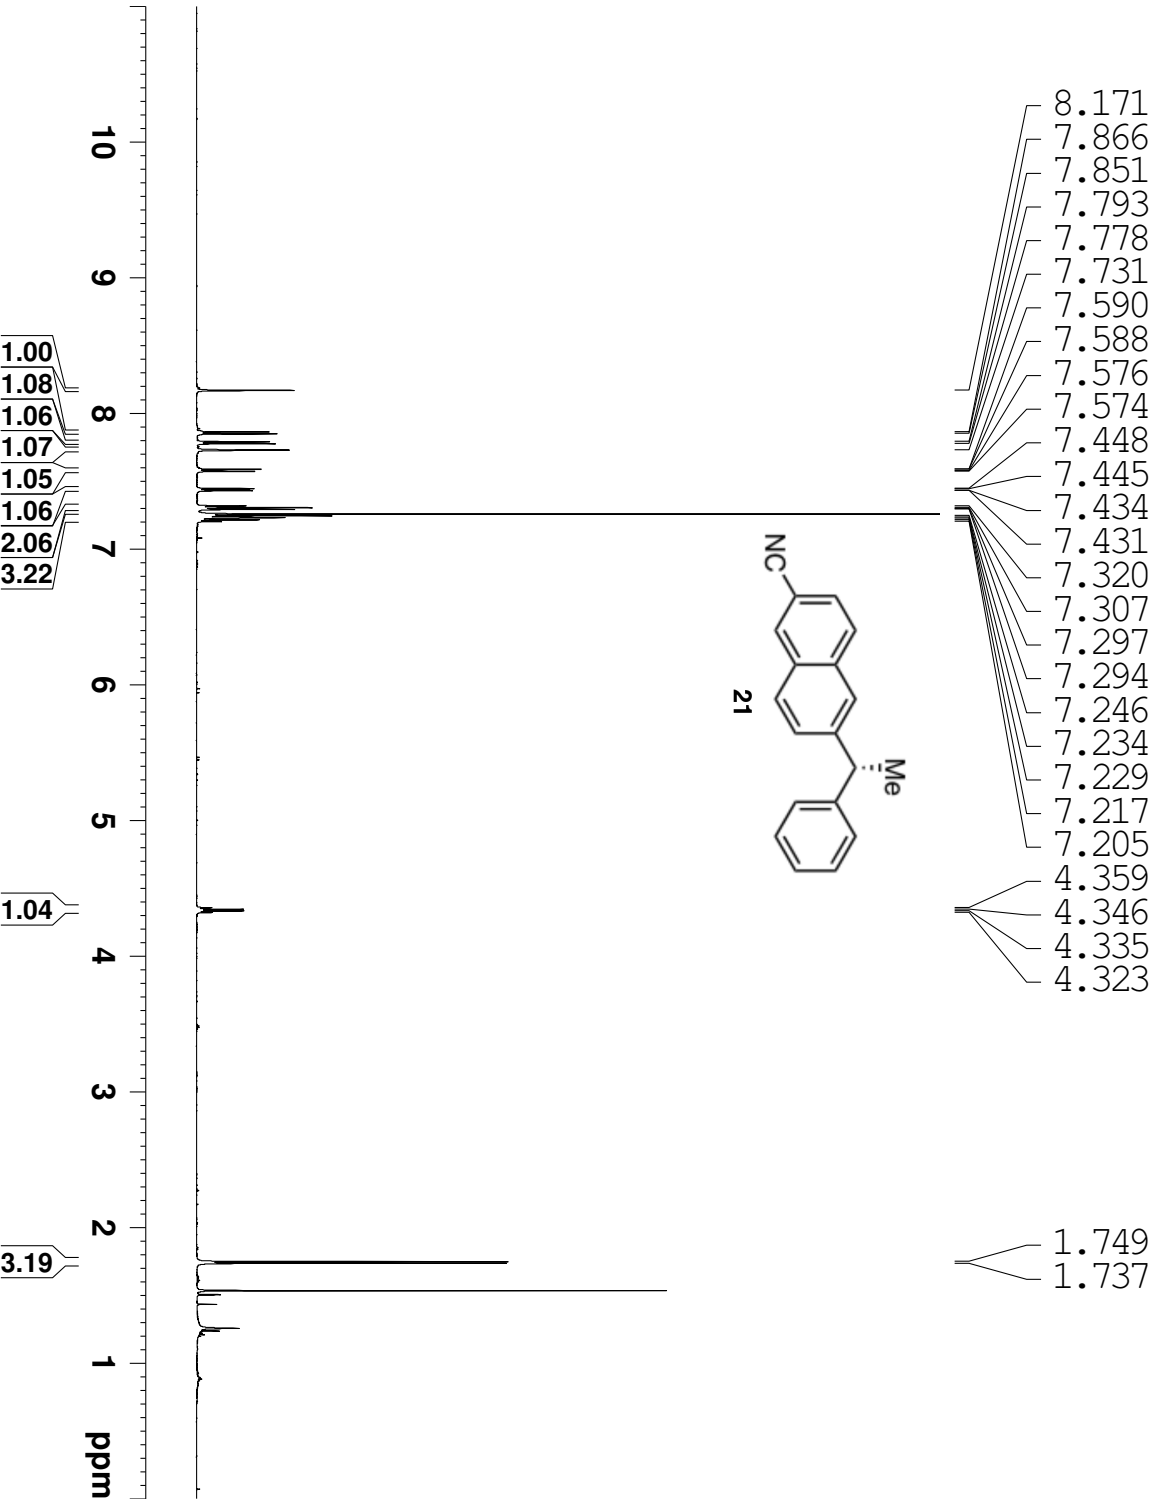

Current Data Parameters  
 NAME QZ-3-219-2  
 EXPNO 1  
 PROCNO 1

F2 - Acquisition Parameters  
 Date\_ 20130125  
 Time 23.24  
 INSTRUM spect  
 PROBHD 5 mm PABBO BB/  
 PULPROG zg30  
 TD 65536  
 SOLVENT CDCl3  
 NS 8  
 DS 2  
 SWH 8403.361 Hz  
 FIDRES 0.128225 Hz  
 AQ 3.8994420 sec  
 RG 228  
 DW 59.500 usec  
 DE 17.39 usec  
 TE 300.0 K  
 D1 1.00000000 sec  
 TD0 1

CHANNEL f1  
 SFO1 600.3233018 MHz  
 NUC1 1H  
 P1 10.77 usec

F2 - Processing parameters  
 SI 65536  
 SF 600.3200168 MHz  
 WDW EM  
 SSB 0  
 LB 0.30 Hz  
 GB 0  
 PC 1.00

compound 21 13NMR

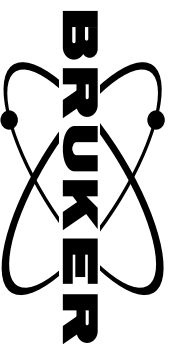

- 147.59
- 145.32
- 134.91
- 133.79
- 130.97
- 128.99
- 128.70
- 128.59
- 128.46
- 127.72
- 126.55
- 126.47
- 125.51
- 119.39
- 108.81

45.00

21.57

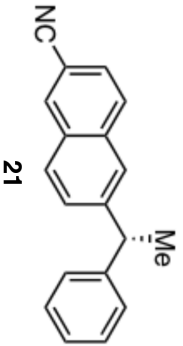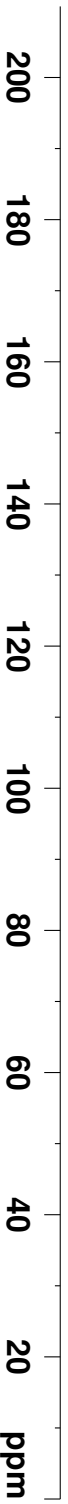

Current Data Parameters  
 NAME QZ-3-219-B-1  
 EXPNO 2  
 PROCNO 1

F2 - Acquisition Parameters

Date\_ 20130126  
 Time 1.08  
 INSTRUM spect  
 PROBHID 5 mm PABBO BB/  
 PULPROG zgpg30  
 TD 65536  
 SOLVENT CDCl3  
 NS 256  
 DS 4  
 SWH 34722.223 Hz  
 FIDRES 0.529819 Hz  
 AQ 0.9437684 sec  
 RG 2050  
 DW 14.400 usec  
 DE 19.34 usec  
 TE 300.0 K  
 D1 1.10000002 sec  
 D11 0.03000000 sec  
 TD0 1

==== CHANNEL f1 =====  
 SF01 150.9656784 MHz  
 NUC1 13C  
 P1 10.63 usec

F2 - Processing parameters  
 SI 32768  
 SF 150.9505840 MHz  
 WDW EM  
 SSB 0  
 LB 1.00 Hz  
 GB 0  
 PC 1.40

Compound 22 1H NMR



Current Data Parameters  
 NAME HH-4-088A  
 EXPNO 1  
 PROCNO 1

F2 - Acquisition Parameters  
 Date\_ 20121129  
 Time\_ 18.26

INSTRUM spect  
 PROBHD 5 mm PABBO BB-  
 PULPROG zg30  
 TD 65536  
 SOLVENT CDCl3  
 NS 8  
 DS 2  
 SWH 8403.361 Hz  
 FIDRES 0.128225 Hz  
 AQ 3.8994420 sec  
 RG 203  
 DW 59.500 usec  
 DE 9.10 usec  
 TE 298.1 K  
 D1 1.00000000 sec  
 TD0 1

==== CHANNEL f1 =====  
 SF01 600.3233018 MHz  
 NUC1 1H  
 P1 14.80 usec

F2 - Processing parameters  
 SI 65536  
 SF 600.3200718 MHz  
 WDW EM  
 SSB 0  
 LB 0.30 Hz  
 GB 0  
 PC 1.00

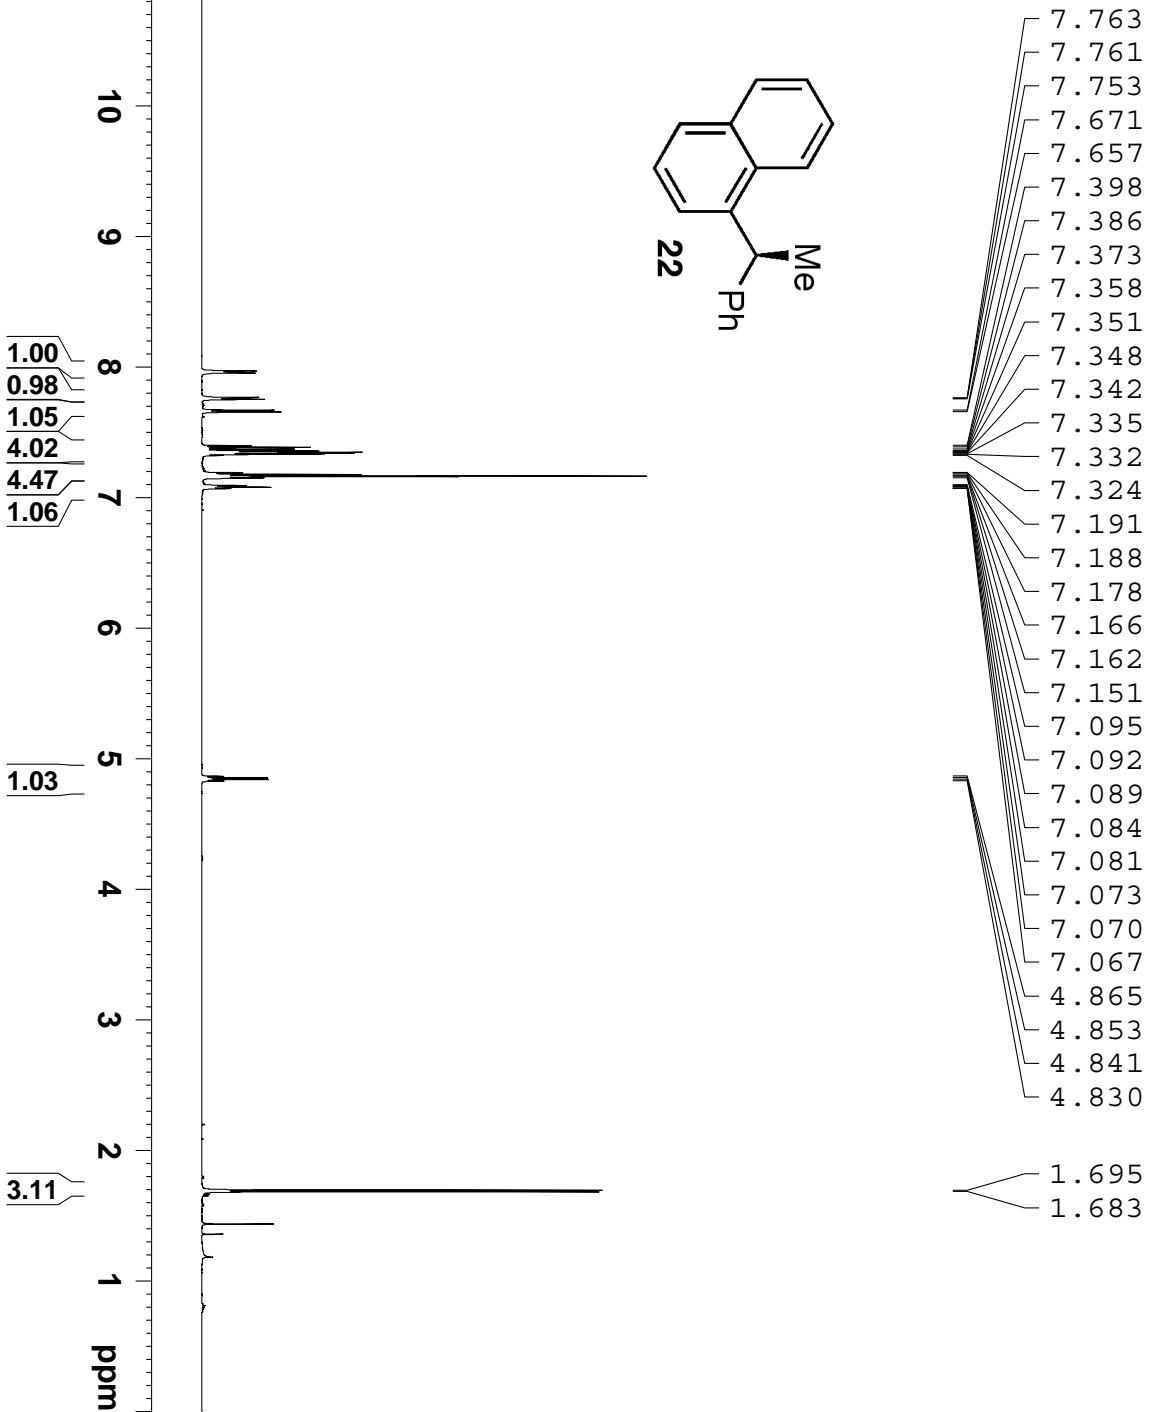

Compound 22 <sup>13</sup>CNMR

- 146.68
- 141.58
- 134.02
- 131.74
- 128.97
- 128.80
- 128.45
- 127.65
- 127.01
- 125.99
- 125.87
- 125.45
- 125.33
- 124.36
- 123.99

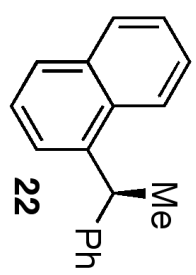

- 40.58
- 22.56

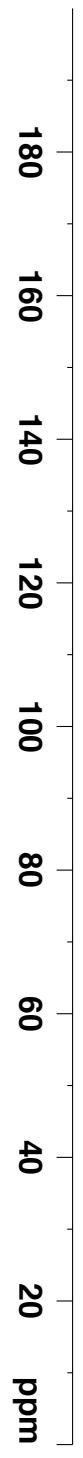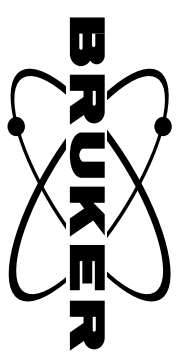

Current Data Parameters  
 NAME HH-4-088A  
 EXPNO 2  
 PROCNO 1

F2 - Acquisition Parameters  
 Date\_ 20121129  
 Time\_ 22.39  
 INSTRUM spect  
 PROBHD 5 mm PABBO BB-  
 PULPROG zgpg55  
 TD 65536  
 SOLVENT CDCl3  
 NS 3000  
 DS 4  
 SWH 34722.223 Hz  
 FIDRES 0.529819 Hz  
 AQ 0.9437684 sec  
 RG 2050  
 DW 14.400 usec  
 DE 8.88 usec  
 TE 298.1 K  
 D1 1.10000002 sec  
 D11 0.03000000 sec  
 TD0 1

==== CHANNEL f1 =====  
 SF01 150.9656784 MHz  
 NUC1 13C  
 P1 9.00 usec

F2 - Processing parameters  
 SI 32768  
 SF 150.9505840 MHz  
 WDW EM  
 SSB 0  
 LB 1.00 Hz  
 GB 0  
 PC 1.40

Compound 23 1H NMR



- 8.100
- 8.079
- 8.003
- 7.840
- 7.804
- 7.783
- 7.744
- 7.708
- 7.704
- 7.690
- 7.687
- 7.683
- 7.669
- 7.666
- 7.607
- 7.566
- 7.564
- 7.546
- 7.529
- 7.526
- 7.465
- 7.418
- 7.399
- 7.361
- 7.357
- 7.328
- 7.247
- 7.242
- 7.233
- 7.229
- 7.020
- 6.892
- 6.575
- 6.307
- 6.123
- 6.074
- 4.425
- 4.407
- 4.389
- 4.371
- 1.958
- 1.940

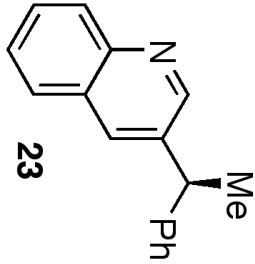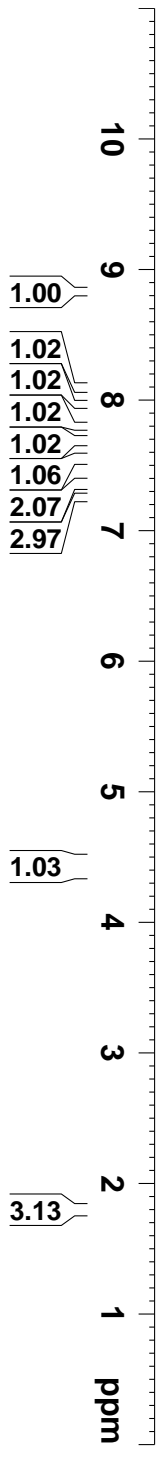

Current Data Parameters  
 NAME QZ-3-157rs  
 EXPNO 1  
 PROCNO 1

F2 - Acquisition Parameters

Date\_ 20121207  
 Time\_ 10.02  
 INSTRUM spect  
 PROBHD 5 mm GPQNP 1H/  
 PULPROG zg30  
 TD 65536  
 SOLVENT CDCl3  
 NS 16  
 DS 2  
 SWH 8278.146 Hz  
 FIDRES 0.126314 Hz  
 AQ 3.9584243 sec  
 RG 6.3  
 DW 60.400 usec  
 DE 6.00 usec  
 TE 298.2 K  
 D1 1.00000000 sec  
 TD0 1

==== CHANNEL f1 =====

NUC1 1H  
 P1 15.00 usec  
 PL1 4.90 dB  
 PL1W 3.30822015 W  
 SFO1 400.1324710 MHz

F2 - Processing parameters

SI 32768  
 SF 400.1300000 MHz  
 WDW EM  
 SSB 0  
 LB 0.30 Hz  
 GB 0  
 PC 1.00

Compound 23 13CNMR



- 151.88
- 146.82
- 144.93
- 138.91
- 133.03
- 129.13
- 128.85
- 128.68
- 128.06
- 127.70
- 127.62
- 126.66
- 126.56

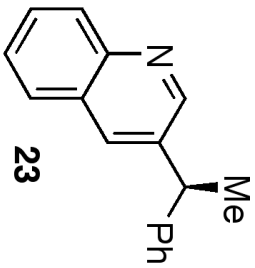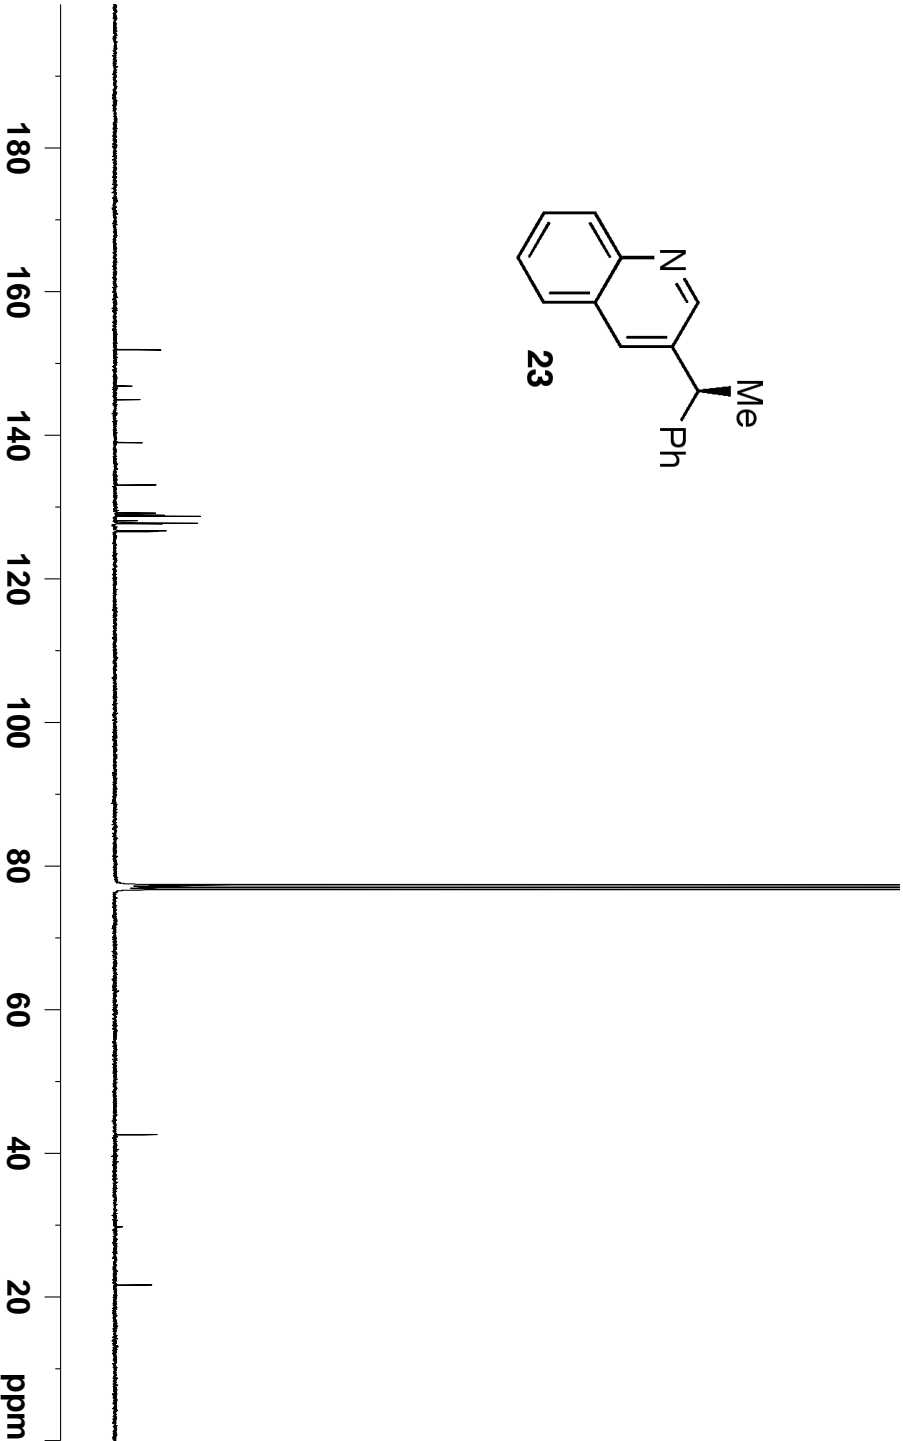

Current Data Parameters  
 NAME QZ-3-157rs  
 EXPNO 2  
 PROCNO 1

F2 - Acquisition Parameters  
 Date\_ 20121207  
 Time\_ 23.46

INSTRUM spect  
 PROBHD 5 mm CPQNP 1H/  
 PULPROG zgpg30  
 TD 65536  
 SOLVENT CDCl3  
 NS 256  
 DS 4  
 SWH 23980.814 Hz  
 FIDRES 0.365918 Hz  
 AQ 1.3664756 sec  
 RG 512  
 DW 20.850 usec  
 DE 18.00 usec  
 TE 298.2 K  
 D1 2.00000000 sec  
 D11 0.03000000 sec  
 TD0 1

==== CHANNEL F1 =====  
 NUC1 13C  
 P1 9.25 usec  
 PL1 0.55 dB  
 PL1W 35.18820572 W  
 SFO1 100.6228298 MHz

==== CHANNEL F2 =====  
 CPDPRG2 waltz16  
 NUC2 1H  
 PCPD2 90.00 usec  
 PL2 4.90 dB  
 PL12 20.46 dB  
 PL13 21.00 dB  
 PL12W 3.30822015 W  
 PL12W 0.09195905 W  
 PL13W 0.08120718 W  
 SFO2 400.1316005 MHz

F2 - Processing parameters  
 SI 32768  
 SF 100.6127690 MHz  
 WDW EM  
 SSB 0  
 LB 1.00 Hz  
 GB 0  
 PC 1.40



Compound 24 1H NMR

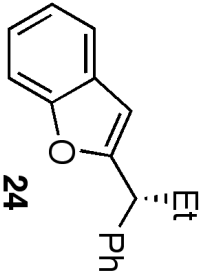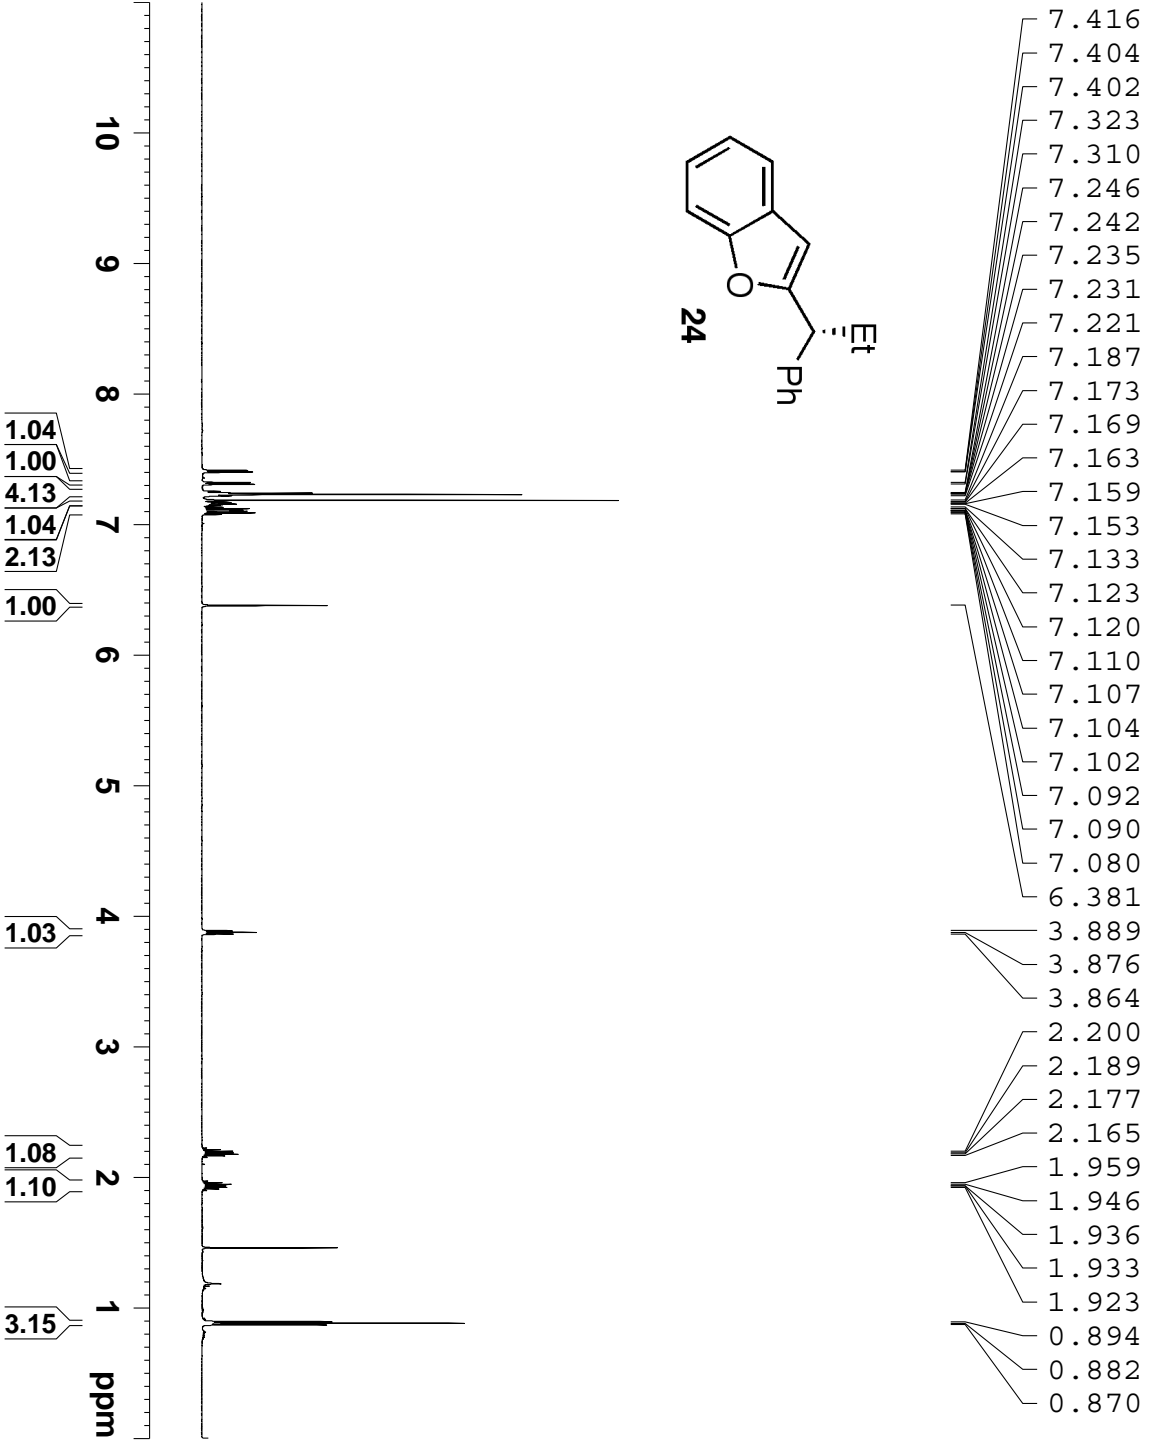

Current Data Parameters  
 NAME HH-4-083 3rd time  
 EXPNO 1  
 PROCNO 1

F2 - Acquisition Parameters  
 Date\_ 20121126  
 Time\_ 1.46  
 INSTRUM spect  
 PROBHD 5 mm PABBO BB-  
 PULPROG zg30  
 TD 65536  
 SOLVENT CDCl3  
 NS 8  
 DS 2  
 SWH 8403.361 Hz  
 FIDRES 0.128225 Hz  
 AQ 3.8994420 sec  
 RG 362  
 DW 59.500 usec  
 DE 9.10 usec  
 TE 298.1 K  
 D1 1.00000000 sec  
 TD0 1

==== CHANNEL f1 =====  
 SF01 600.3233018 MHz  
 NUC1 1H  
 P1 14.80 usec  
 F2 - Processing parameters  
 SI 65536  
 SF 600.3200598 MHz  
 WDW EM  
 SSB 0  
 LB 0.30 Hz  
 GB 0  
 PC 1.00



|        |
|--------|
| 161.23 |
| 154.77 |
| 141.94 |
| 128.69 |
| 128.51 |
| 128.04 |
| 126.75 |
| 123.31 |
| 122.43 |
| 120.42 |
| 110.97 |
| 102.38 |
| 47.56  |
| 27.59  |
| 12.42  |

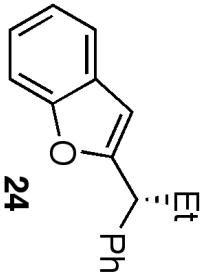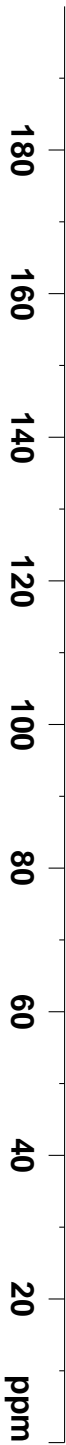

Current Data Parameters  
 NAME HH-4-083 3rd time  
 EXPNO 2  
 PROCNO 1

F2 - Acquisition Parameters  
 Date\_ 20121126  
 Time\_ 3.32  
 INSTRUM spect  
 PROBHD 5 mm PABBO BB-  
 PULPROG zgpg55  
 TD 65536  
 SOLVENT CDCl3  
 NS 3000  
 DS 4  
 SWH 34722.223 Hz  
 FIDRES 0.529819 Hz  
 AQ 0.9437684 sec  
 RG 2050  
 DW 14.400 usec  
 DE 8.88 usec  
 TE 298.1 K  
 D1 1.10000002 sec  
 D11 0.03000000 sec  
 TD0 1

==== CHANNEL f1 =====  
 SFO1 150.9656784 MHz  
 NUC1 13C  
 P1 9.00 usec  
 F2 - Processing parameters  
 SI 32768  
 SF 150.9505840 MHz  
 WDM EM  
 SSB 0  
 LB 1.00 Hz  
 GB 0  
 PC 1.40

Compound 25 1H NMR



- 7.559
- 7.556
- 7.553
- 7.545
- 7.542
- 7.538
- 7.462
- 7.459
- 7.450
- 7.439
- 7.437
- 7.366
- 7.364
- 7.362
- 7.352
- 7.338
- 7.330
- 7.327
- 7.324
- 7.307
- 7.305
- 7.294
- 7.280
- 7.248
- 7.246
- 7.244
- 7.234
- 7.224
- 7.220
- 4.252
- 4.240
- 4.228
- 4.215
- 1.722
- 1.710

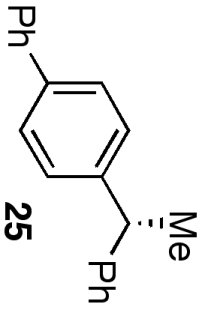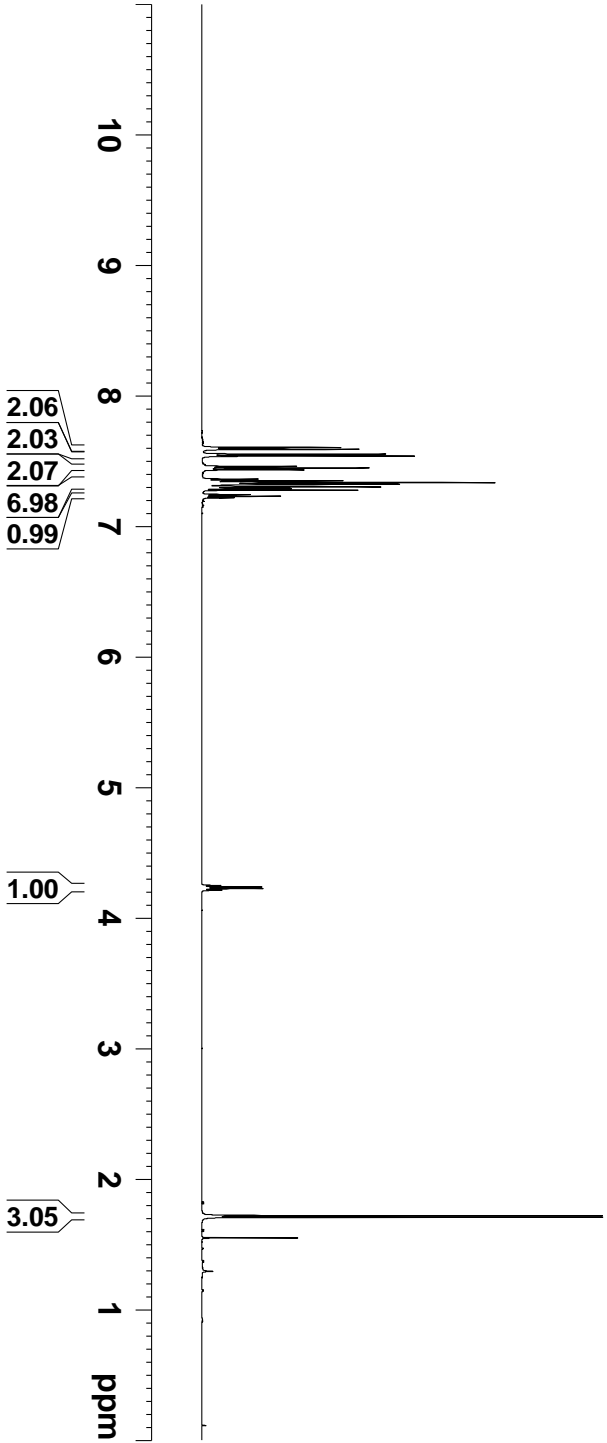

Current Data Parameters  
 NAME QZ-Compound 23  
 EXPNO 1  
 PROCNO 1

F2 - Acquisition Parameters  
 Date\_ 20121209  
 Time\_ 14.07  
 INSTRUM spect  
 PROBHD 5 mm PABBO BB/  
 PULPROG zg30  
 TD 65536  
 SOLVENT CDCl3  
 NS 8  
 DS 2  
 SWH 8403.361 Hz  
 FIDRES 0.128225 Hz  
 AQ 3.8994420 sec  
 RG 114  
 DW 59.500 usec  
 DE 17.39 usec  
 TE 298.1 K  
 D1 1.00000000 sec  
 TD0 1

==== CHANNEL f1 =====  
 SFO1 600.3233018 MHz  
 NUC1 1H  
 P1 10.77 usec

F2 - Processing parameters  
 SI 65536  
 SF 600.3200047 MHz  
 WDW EM  
 SSB 0  
 LB 0.30 Hz  
 GB 0  
 PC 1.00

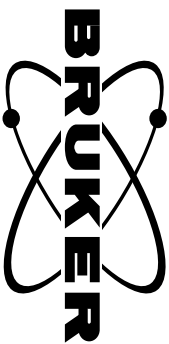

- 146.29
- 145.53
- 141.03
- 138.98
- 128.73
- 128.45
- 128.04
- 127.67
- 127.13
- 127.07
- 127.04
- 126.13

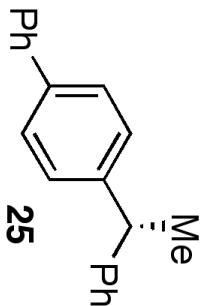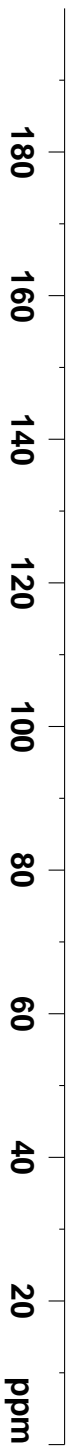

- 44.51
- 21.89

Current Data Parameters  
 NAME QZ-Compound 23  
 EXPNO 2  
 PROCNO 1

F2 - Acquisition Parameters  
 Date\_ 20121209  
 Time\_ 14.18  
 INSTRUM spect  
 PROBHD 5 mm PABBO BB/  
 PULPROG zgpg55  
 TD 65536  
 SOLVENT CDCl3  
 NS 256  
 DS 4  
 SWH 34722.223 Hz  
 FIDRES 0.529819 Hz  
 AQ 0.9437684 sec  
 RG 2050  
 DW 14.400 usec  
 DE 19.34 usec  
 TE 298.1 K  
 D1 1.10000002 sec  
 D11 0.03000000 sec  
 TD0 1

==== CHANNEL f1 =====  
 SF01 150.9656784 MHz  
 NUC1 13C  
 P1 10.63 usec

F2 - Processing parameters  
 SI 32768  
 SF 150.9505840 MHz  
 WDW EM  
 SSB 0  
 LB 1.00 Hz  
 GB 0  
 PC 1.40

Compound 1a 1HNMR

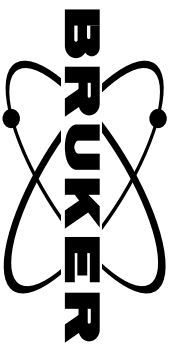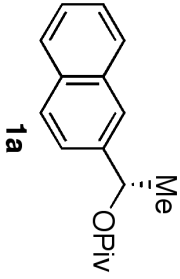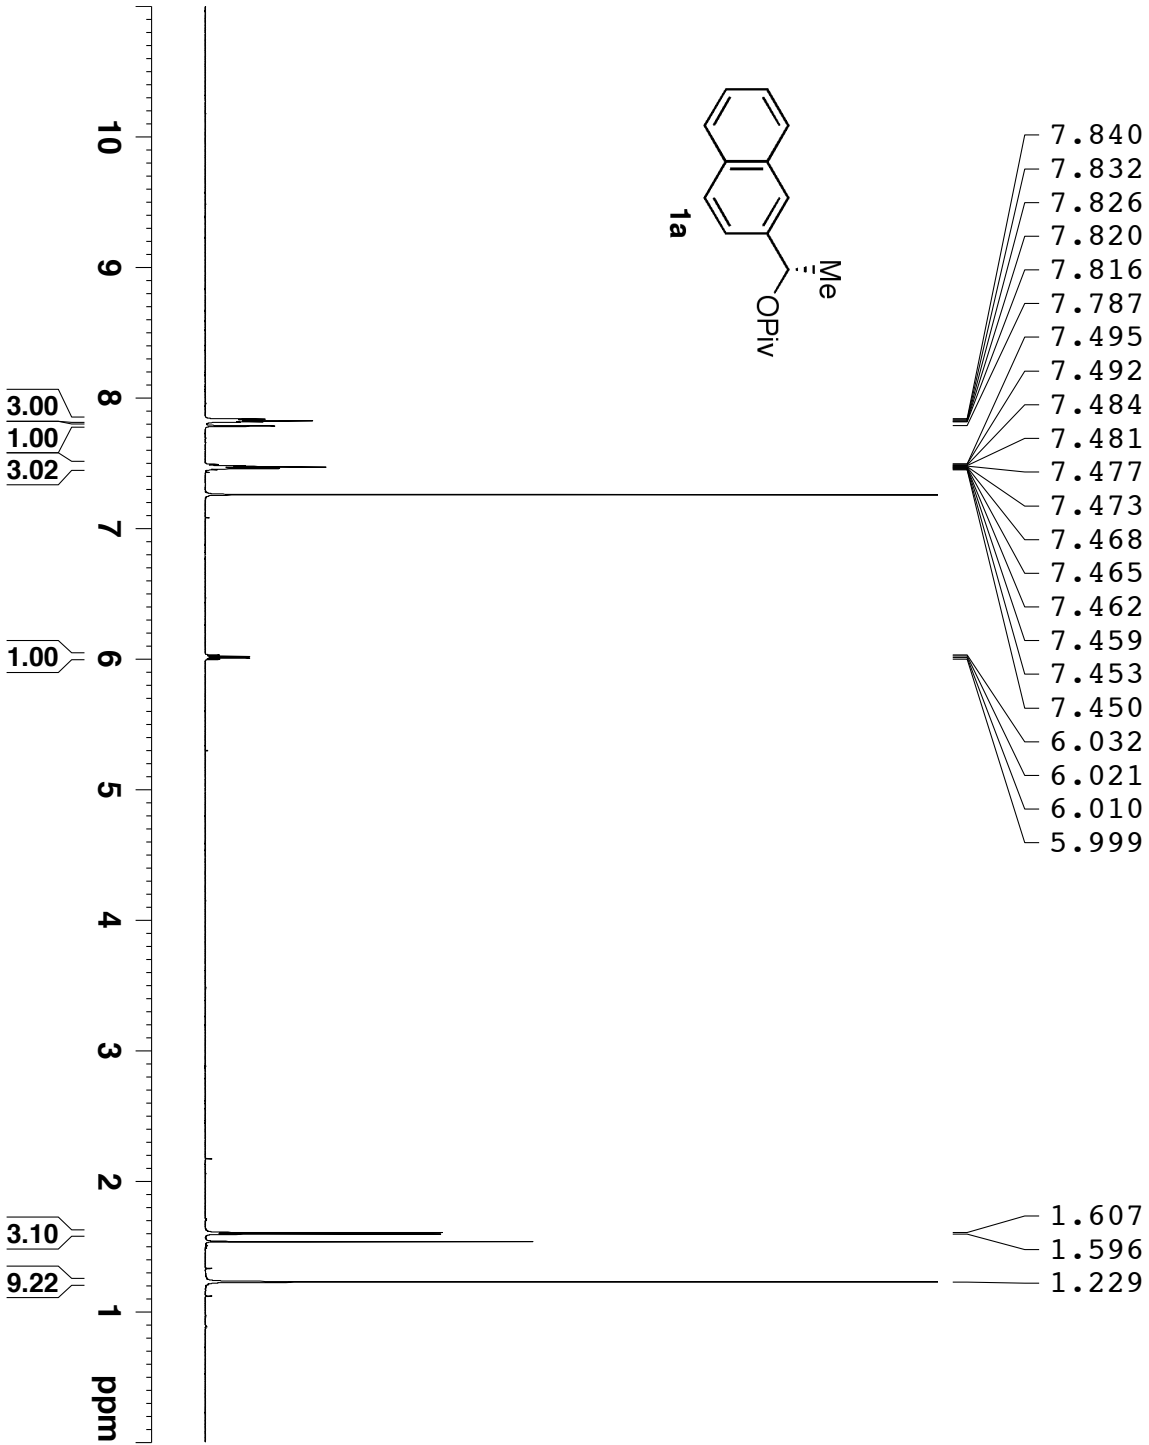

Current Data Parameters  
 NAME methyl1 sub  
 EXPNO 1  
 PROCNO 1

F2 - Acquisition Parameters  
 Date\_ 20121125  
 Time\_ 18.30  
 INSTRUM spect  
 PROBHD 5 mm PABBO BB-  
 PULPROG zg30  
 TD 65536  
 SOLVENT CDCl3  
 NS 8  
 DS 2  
 SWH 8403.361 Hz  
 FIDRES 0.128225 Hz  
 AQ 3.8994420 sec  
 RG 406  
 DW 59.500 usec  
 DE 9.10 usec  
 TE 298.1 K  
 D1 1.00000000 sec  
 TD0 1

==== CHANNEL f1 =====  
 SF01 600.3233018 MHz  
 NUC1 1H  
 P1 14.80 usec  
 F2 - Processing parameters  
 SI 65536  
 SF 600.3200156 MHz  
 WDW EM  
 SSB 0  
 LB 0.30 Hz  
 GB 0  
 PC 1.00



Compound 1a 13CNMR

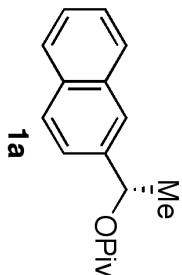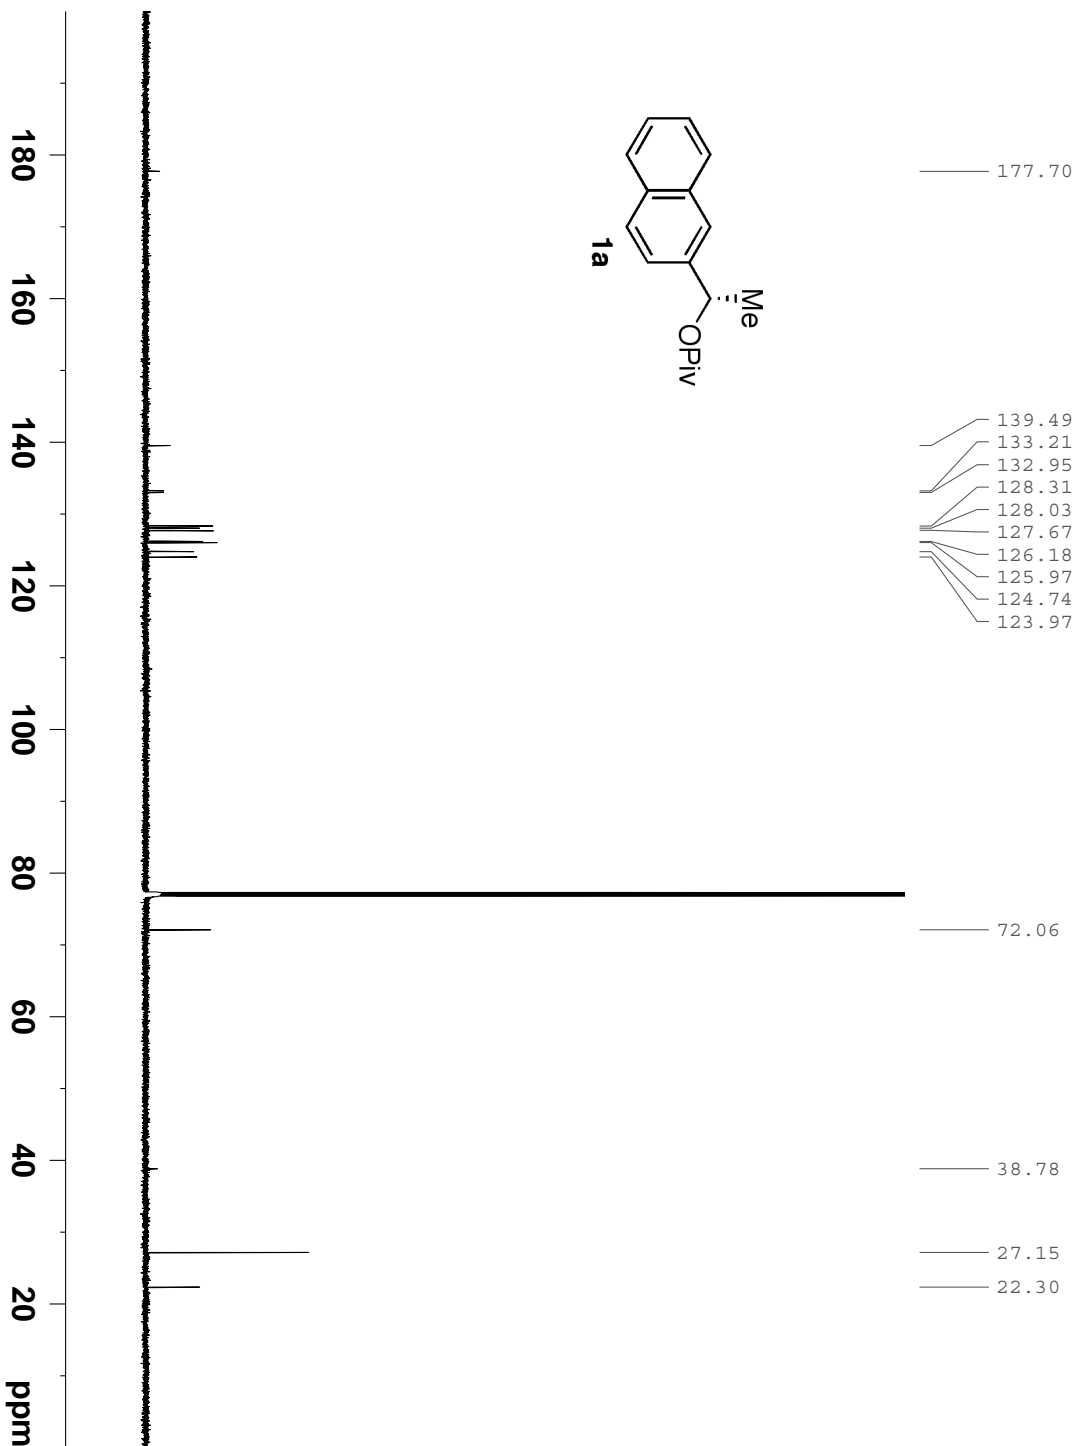

Current Data Parameters  
NAME methyl1 sub  
EXPNO 2  
PROCNO 1

F2 - Acquisition Parameters  
Date\_ 20121125  
Time\_ 22.39

INSTRUM spect  
PROBHD 5 mm PABBO BB-  
PULPROG zgpg55  
TD 65536  
SOLVENT CDCl3  
NS 2048  
DS 4  
SWH 34722.223 Hz  
FIDRES 0.529819 Hz  
AQ 0.9437684 sec  
RG 2050  
DW 14.400 usec  
DE 8.88 usec  
TE 298.1 K  
D1 1.10000002 sec  
D11 0.03000000 sec  
TD0 1

==== CHANNEL f1 =====  
SFO1 150.9656784 MHz  
NUC1 13C  
P1 9.00 usec

F2 - Processing parameters  
SI 32768  
SF 150.9505840 MHz  
WDW EM  
SSB 0  
LB 1.00 Hz  
GB 0  
PC 1.40

Compound 1b 1HNMR

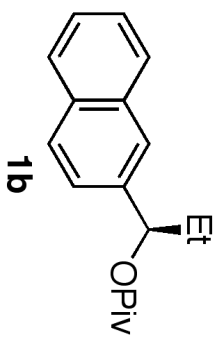

- 7.754
- 7.747
- 7.741
- 7.685
- 7.415
- 7.413
- 7.404
- 7.401
- 7.398
- 7.393
- 7.388
- 7.385
- 7.382
- 7.377
- 7.374
- 7.363
- 7.360
- 5.740
- 5.729
- 5.717

- 1.948
- 1.935
- 1.924
- 1.912
- 1.900
- 1.887
- 1.861
- 1.849
- 1.838
- 1.836
- 1.826
- 1.815
- 1.813
- 1.803

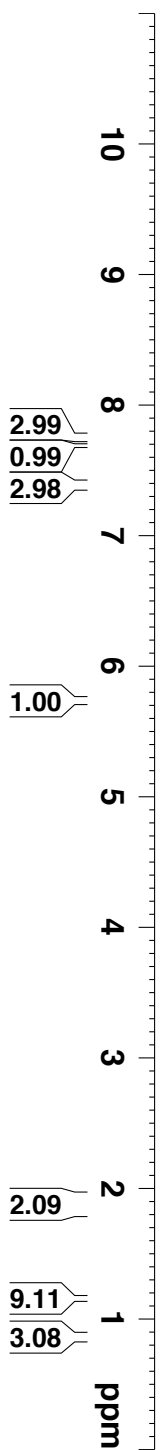

Current Data Parameters  
 NAME HH-4-065rs\_2  
 EXPNO 1  
 PROCNO 1

F2 - Acquisition Parameters  
 Date\_ 20121208  
 Time\_ 16.48  
 INSTRUM spect  
 PROBHD 5 mm PABBO BB/  
 PULPROG zg30  
 TD 65536  
 SOLVENT CDCl3  
 NS 8  
 DS 2  
 SWH 8403.361 Hz  
 FIDRES 0.128225 Hz  
 AQ 3.8994420 sec  
 RG 144  
 DW 59.500 usec  
 DE 17.39 usec  
 TE 298.1 K  
 D1 1.00000000 sec  
 TD0 1

==== CHANNEL f1 =====  
 SF01 600.3233018 MHz  
 NUC1 1H  
 P1 10.77 usec

F2 - Processing parameters  
 SI 65536  
 SF 600.3200619 MHz  
 WDW EM  
 SSB 0  
 LB 0.30 Hz  
 GB 0  
 PC 1.00

Compound 1b 1HNMR

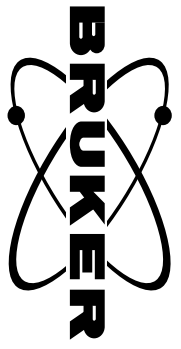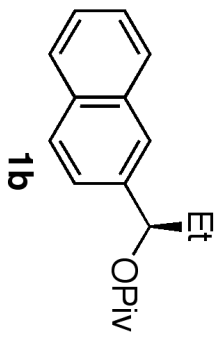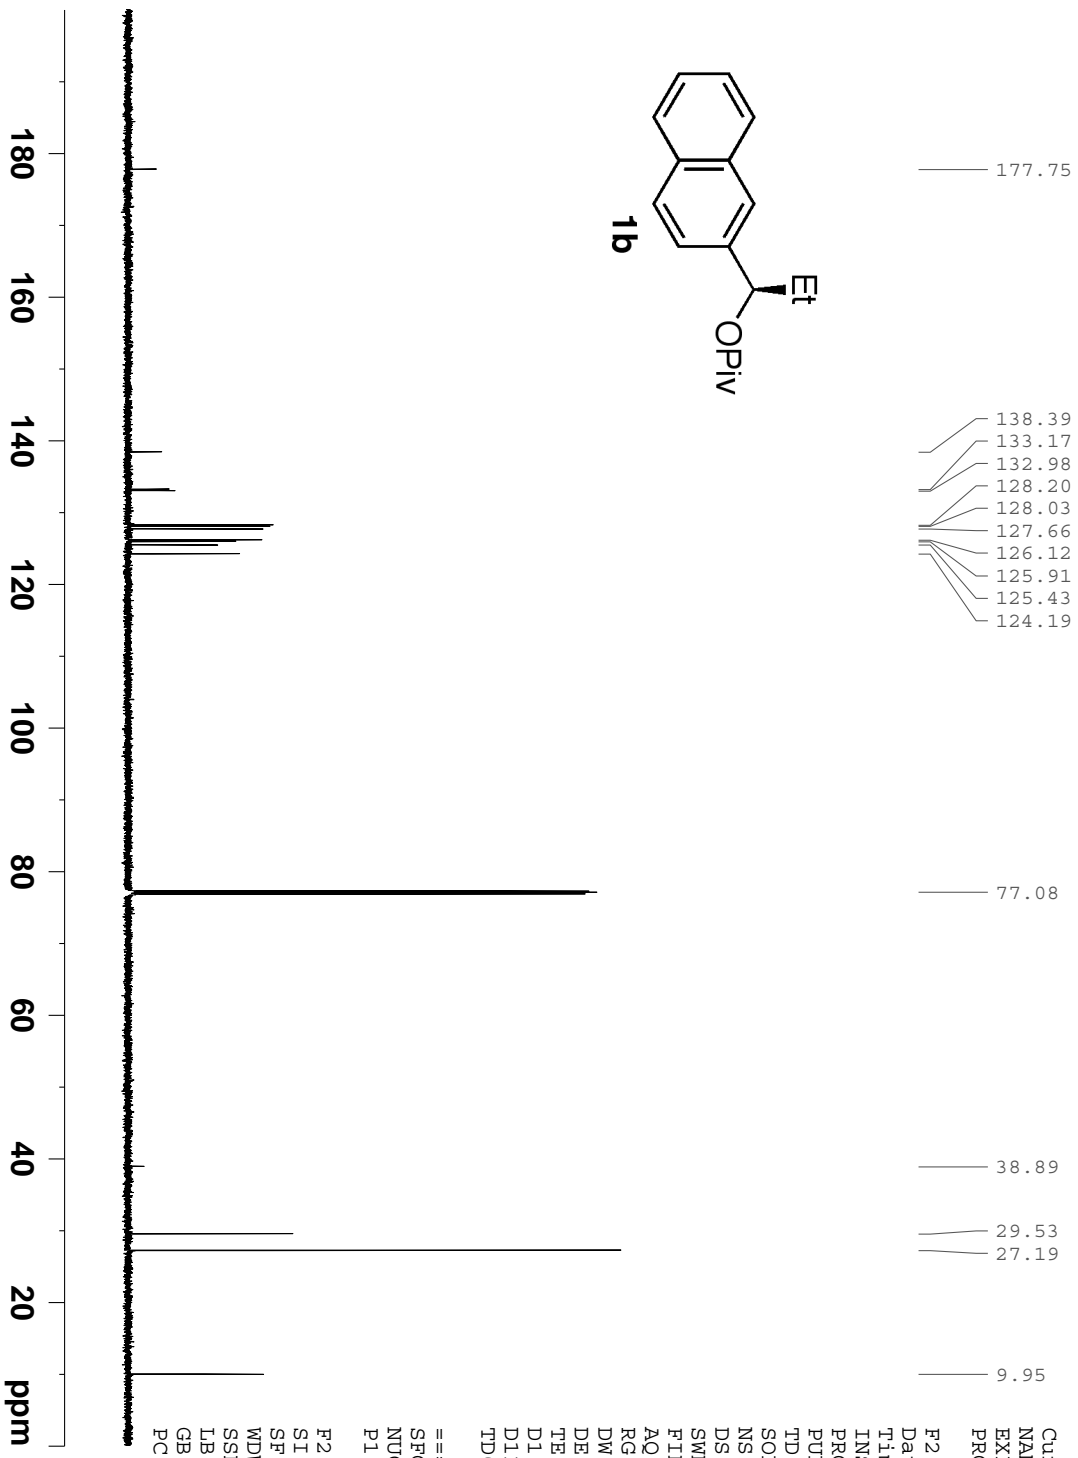

177.75  
138.39  
133.17  
132.98  
128.20  
128.03  
127.66  
126.12  
125.91  
125.43  
124.19

77.08

38.89  
29.53  
27.19

9.95

Current Data Parameters  
NAME HH-4-065r5  
EXPNO 2  
PROCNO 1

F2 - Acquisition Parameters  
Date\_ 20121208  
Time\_ 16.58  
INSTRUM spect  
PROBHD 5 mm PABBO BB/  
PULPROG zgpg55  
TD 65536  
SOLVENT CDCl3  
NS 256  
DS 4  
SWH 34722.223 Hz  
FIDRES 0.529819 Hz  
AQ 0.9437684 sec  
RG 2050  
DW 14.400 usec  
DE 19.34 usec  
TE 298.1 K  
D1 1.10000002 sec  
D11 0.03000000 sec  
TD0 1

==== CHANNEL f1 =====  
SFO1 150.9656784 MHz  
NUC1 13C  
P1 10.63 usec

F2 - Processing parameters  
SI 32768  
SF 150.9505840 MHz  
WDW EM  
SSB 0  
LB 1.00 Hz  
GB 0  
PC 1.40



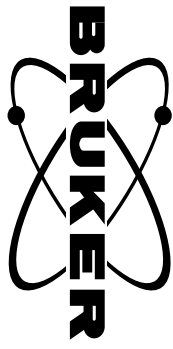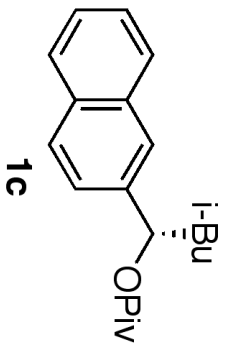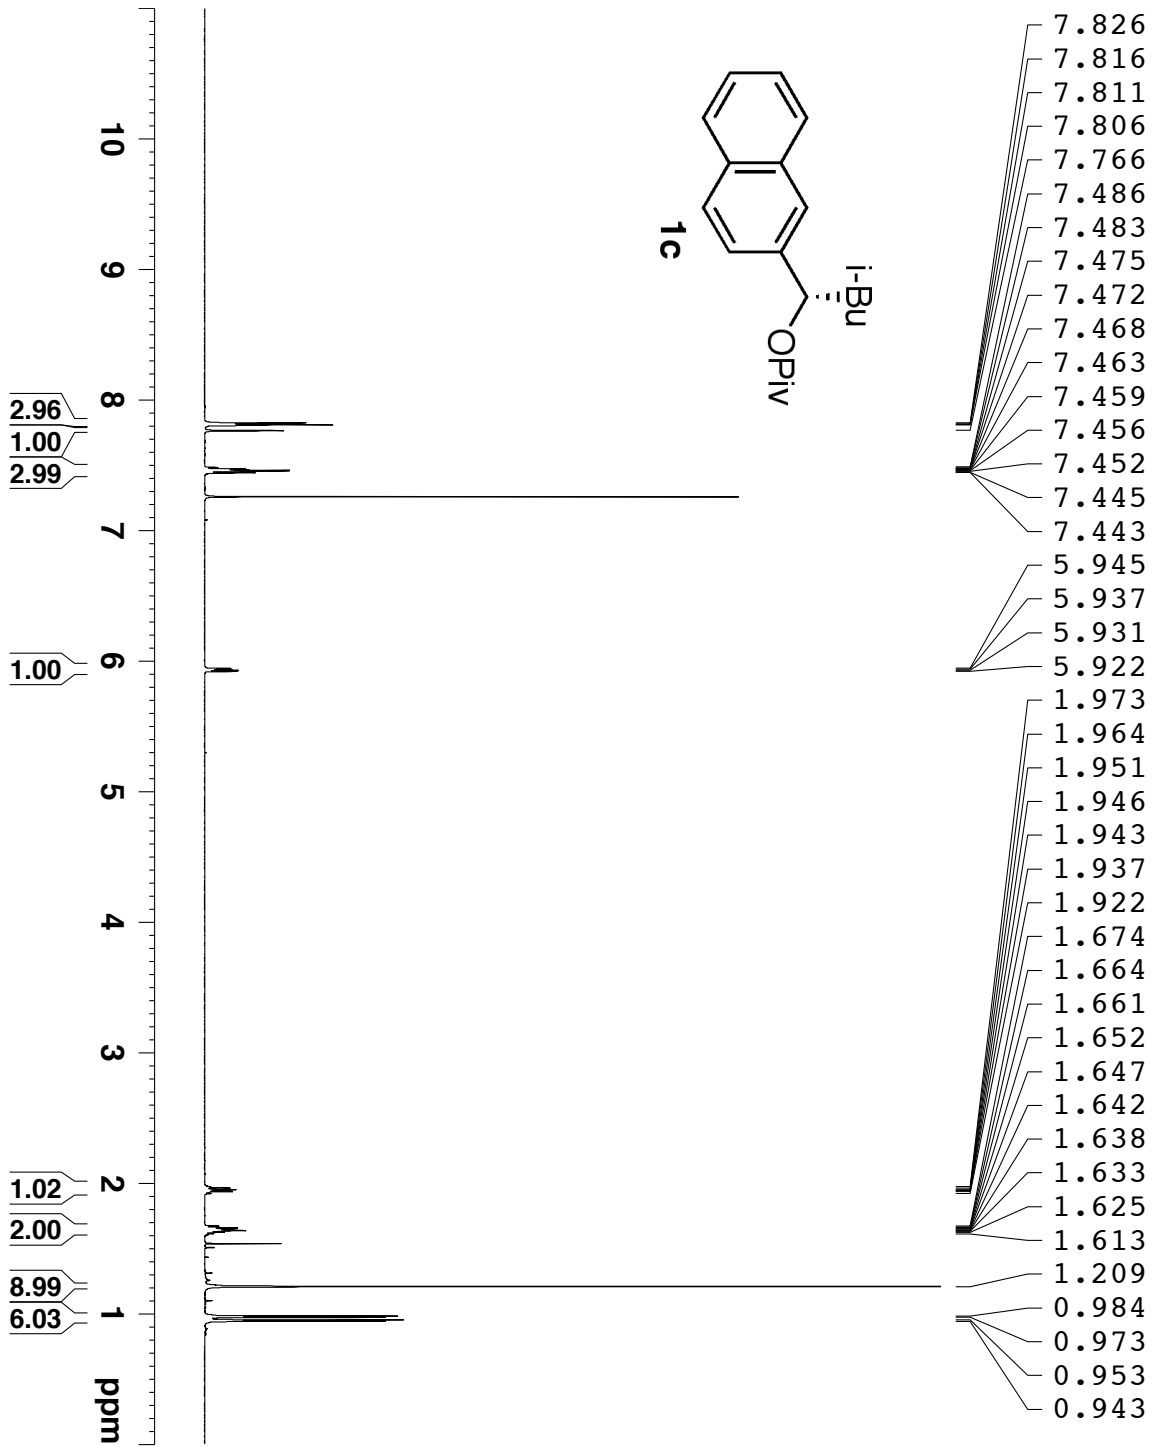

Current Data Parameters  
 NAME QZ-3-134  
 EXPNO 1  
 PROCNO 1

F2 - Acquisition Parameters  
 Date\_ 20121126  
 Time\_ 12.44  
 INSTRUM spect  
 PROBHD 5 mm PABBO BB-  
 PULPROG zg30  
 TD 65536  
 SOLVENT CDCl3  
 NS 8  
 DS 2  
 SWH 8403.361 Hz  
 FIDRES 0.128225 Hz  
 AQ 3.8994420 sec  
 RG 322  
 DW 59.500 usec  
 DE 9.10 usec  
 TE 298.1 K  
 D1 1.00000000 sec  
 TD0 1

==== CHANNEL f1 =====  
 SF01 600.3233018 MHz  
 NUC1 1H  
 P1 14.80 usec  
 F2 - Processing parameters  
 SI 65536  
 SF 600.3200160 MHz  
 WDW EM  
 SSB 0  
 LB 0.30 Hz  
 GB 0  
 PC 1.00

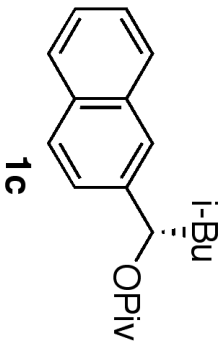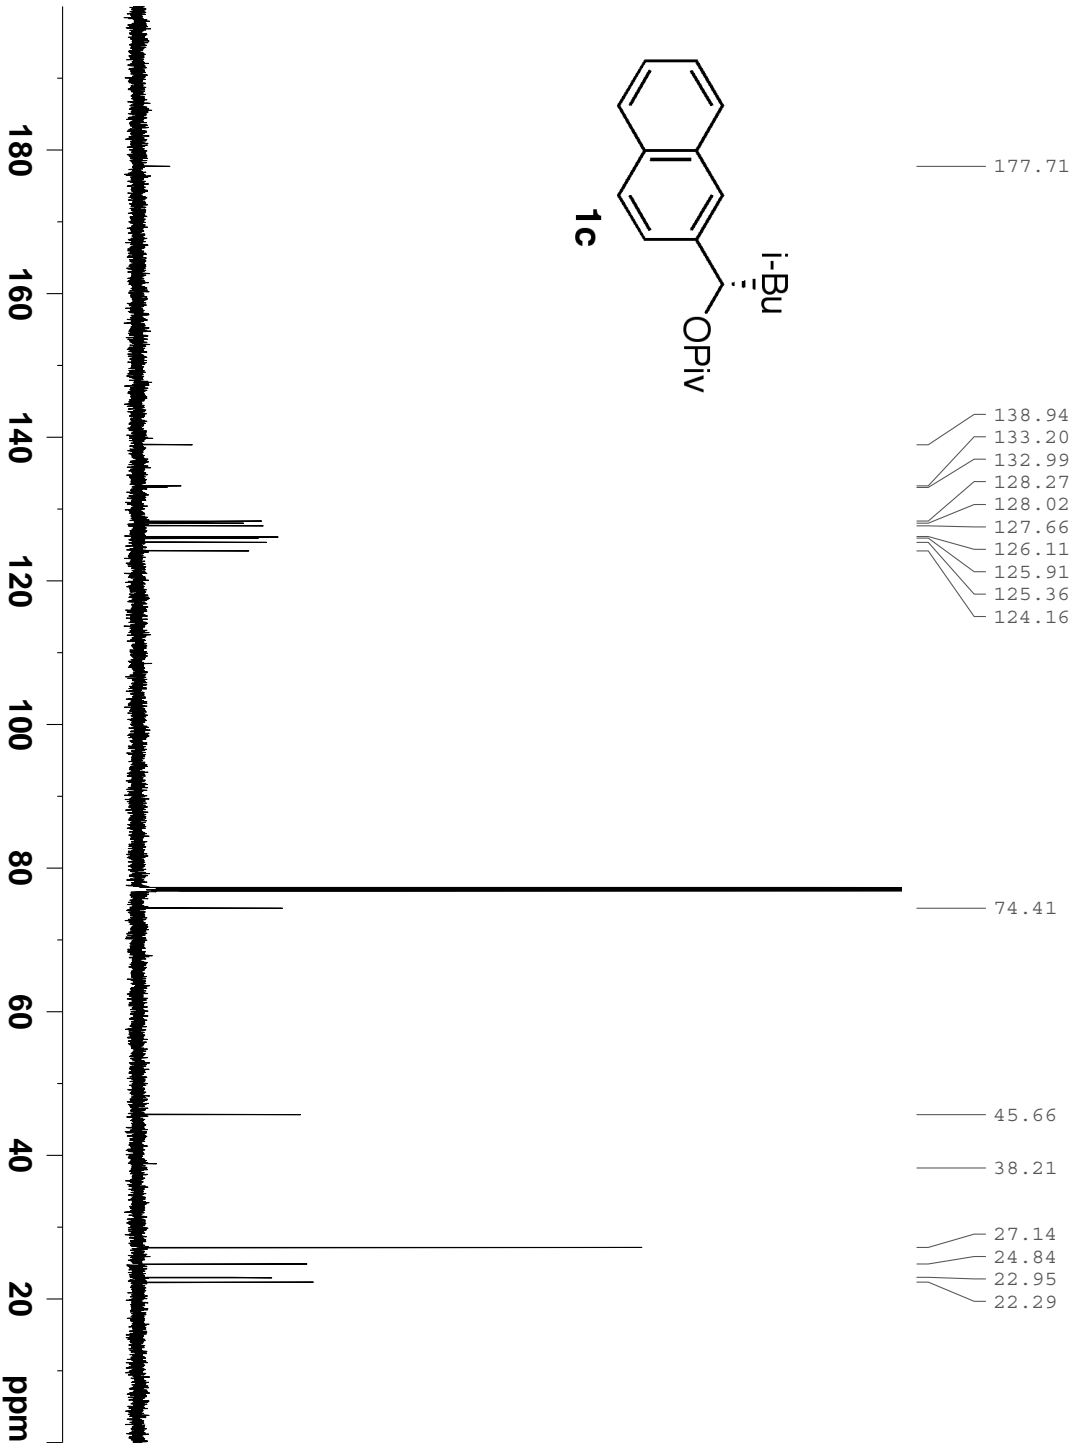

Current Data Parameters  
 NAME QZ-3-134  
 EXPNO 2  
 PROCNO 1

F2 - Acquisition Parameters  
 Date\_ 20121126  
 Time\_ 12.54  
 INSTRUM spect  
 PROBHD 5 mm PABBO BB-  
 PULPROG zgpg55  
 TD 65536  
 SOLVENT CDCl3  
 NS 256  
 DS 4  
 SWH 34722.223 Hz  
 FIDRES 0.529819 Hz  
 AQ 0.9437684 sec  
 RG 2050  
 DW 14.400 usec  
 DE 8.88 usec  
 TE 298.1 K  
 D1 1.10000002 sec  
 D11 0.03000000 sec  
 TD0 1

==== CHANNEL f1 =====  
 SF01 150.9656784 MHz  
 NUC1 13C  
 P1 9.00 usec

F2 - Processing parameters  
 SI 32768  
 SF 150.9505840 MHz  
 WDM EM  
 SSB 0  
 LB 1.00 Hz  
 GB 0  
 PC 1.40

Compound 1d, <sup>1</sup>H NMR

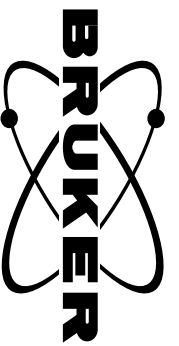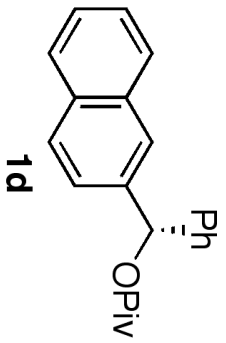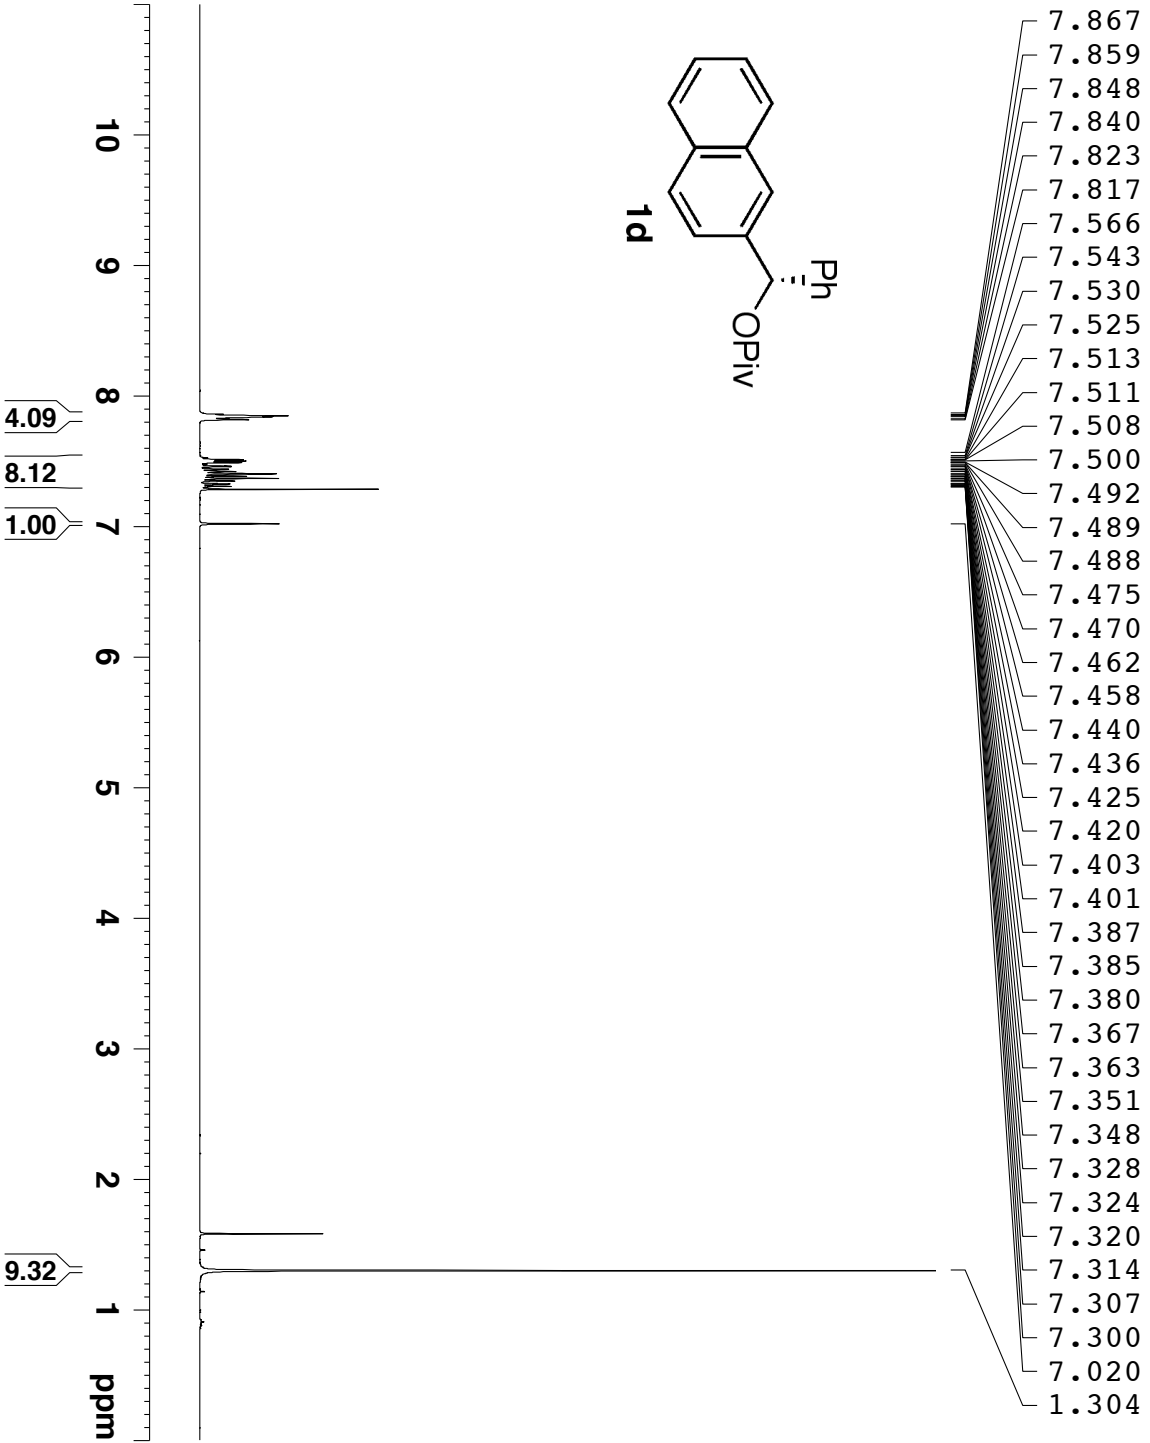

Current Data Parameters  
 NAME HH-3-266  
 EXPNO 1  
 PROCNO 1

F2 - Acquisition Parameters  
 Date\_ 20120914  
 Time\_ 9.42  
 INSTRUM spect  
 PROBHD 5 mm CPQNP 1H/  
 PULPROG zg30  
 TD 65536  
 SOLVENT CDCl3  
 NS 16  
 DS 2  
 SWH 8278.146 Hz  
 FIDRES 0.126314 Hz  
 AQ 3.9584243 sec  
 RG 11.3  
 DW 60.400 usec  
 DE 6.00 usec  
 TE 298.2 K  
 D1 1.00000000 sec  
 TD0 1

==== CHANNEL f1 =====  
 NUC1 1H  
 P1 15.00 usec  
 PL1 4.90 dB  
 PL1W 3.30822015 W  
 SFO1 400.1324710 MHz

F2 - Processing parameters  
 SI 32768  
 SF 400.1300000 MHz  
 WDW EM  
 SSB 0  
 LB 0.30 Hz  
 GB 0  
 PC 1.00

Compound 1d 13CNMR

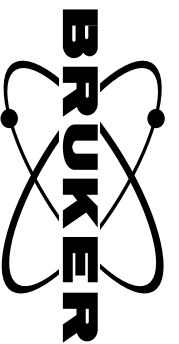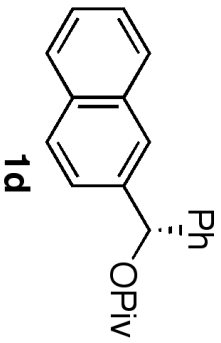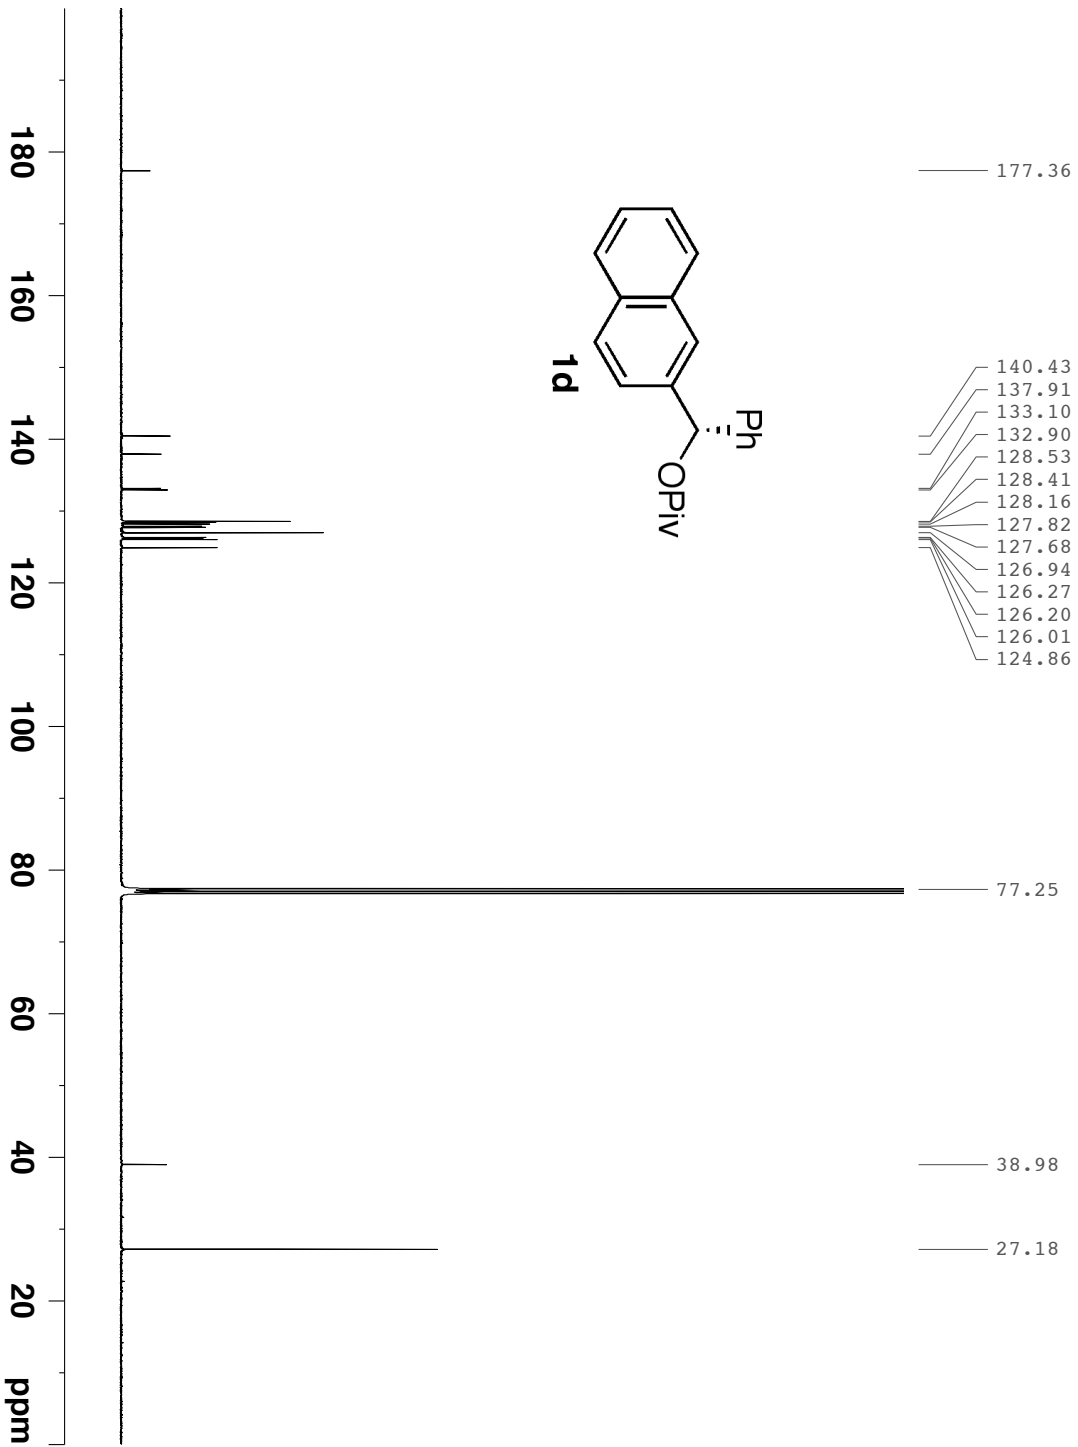

- 177.36
- 140.43
- 137.91
- 133.10
- 132.90
- 128.53
- 128.41
- 128.16
- 127.82
- 127.68
- 126.94
- 126.27
- 126.20
- 126.01
- 124.86

- 77.25
- 38.98
- 27.18

Current Data Parameters  
 NAME HH-3-266  
 EXPNO 2  
 PROCNO 1

F2 - Acquisition Parameters  
 Date\_ 20120916  
 Time\_ 14.48

INSTRUM spect  
 PROBHD 5 mm CPQNP 1H/  
 PULPROG zgpg30  
 TD 65536  
 SOLVENT CDC13  
 NS 1024  
 DS 4  
 SWH 23980.814 Hz  
 FIDRES 0.365918 Hz  
 AQ 1.3664756 sec  
 RG 512  
 DW 20.850 usec  
 DE 18.00 usec  
 TE 298.2 K  
 D1 2.00000000 sec  
 D11 0.03000000 sec  
 TD0 1

==== CHANNEL f1 =====  
 NUC1 13C  
 P1 9.25 usec  
 PL1 0.55 dB  
 PL1W 35.18820572 W  
 SFO1 100.6228298 MHz

==== CHANNEL f2 =====  
 CPDPRG2 waltz16  
 NUC2 1H  
 PCPD2 90.00 usec  
 PL2 4.90 dB  
 PL12 20.46 dB  
 PL13 21.00 dB  
 PL12W 3.30822015 W  
 PL12W 0.09195905 W  
 PL13W 0.08120718 W  
 SFO2 400.1316005 MHz

F2 - Processing parameters  
 SI 32768  
 SF 100.6127690 MHz  
 WDW EM  
 SSB 0  
 LB 1.00 Hz  
 GB 0  
 PC 1.40

Compound 1e 1HNMR

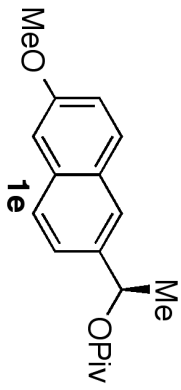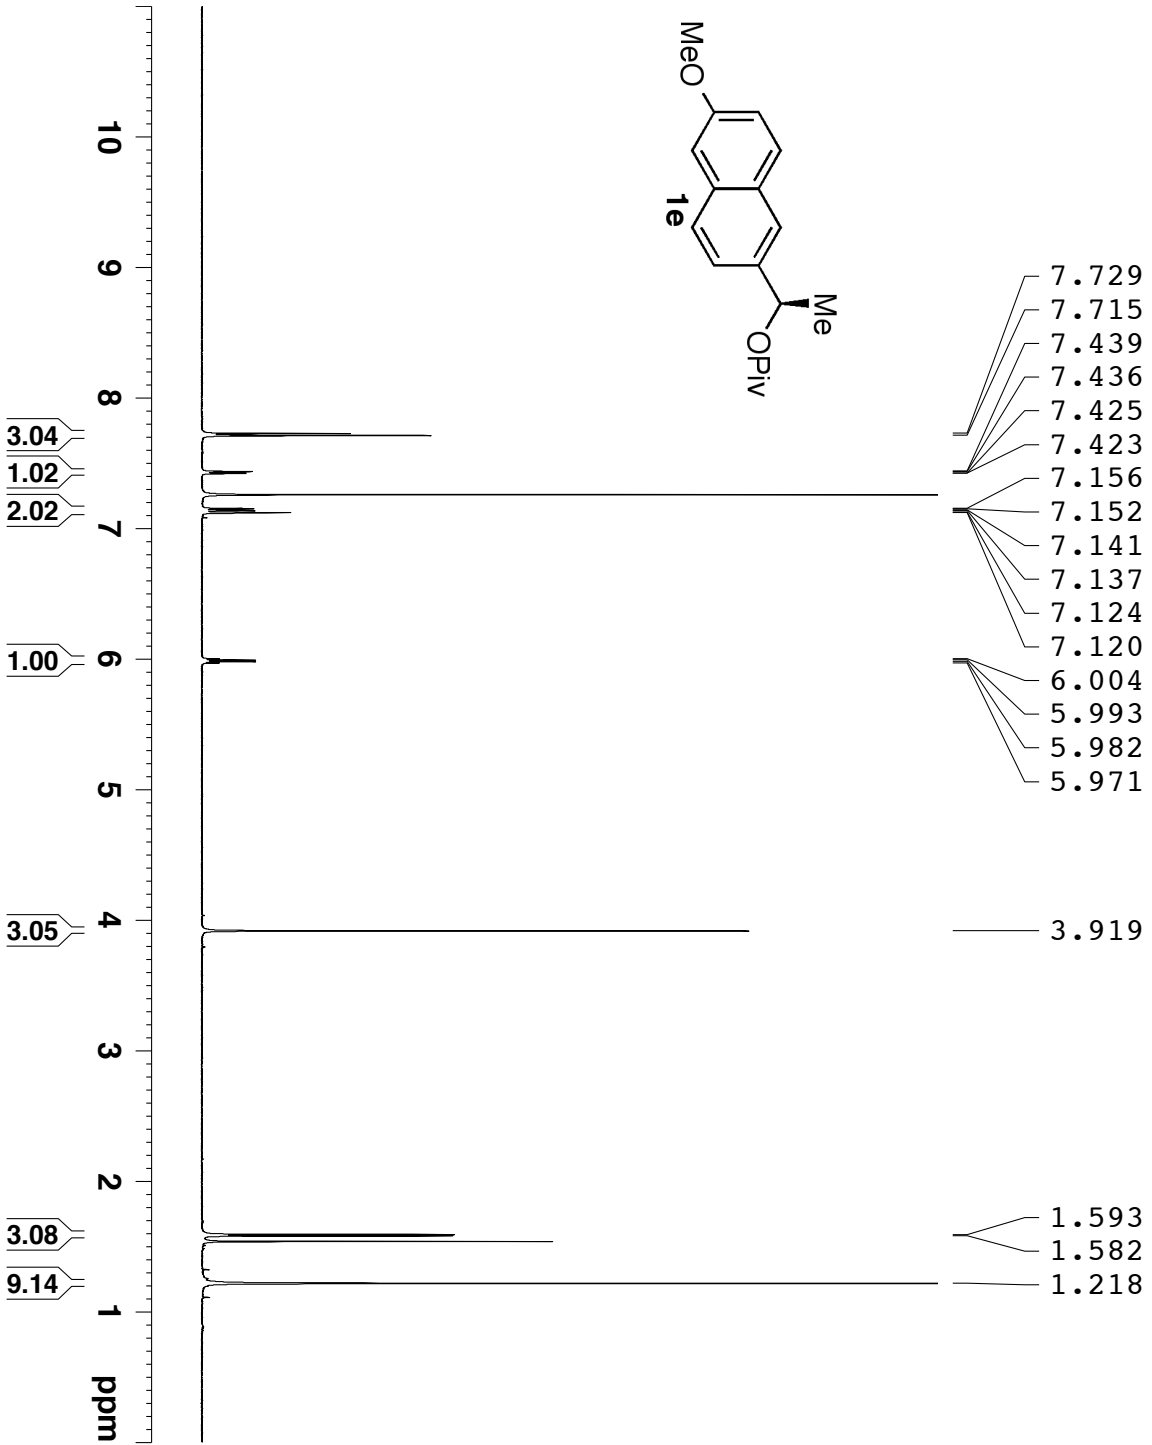

Current Data Parameters  
 NAME 6methoxy piv  
 EXPNO 1  
 PROCNO 1

F2 - Acquisition Parameters  
 Date\_ 20121125  
 Time\_ 18.34  
 INSTRUM spect  
 PROBHD 5 mm PABBO BB-  
 PULPROG zg30  
 TD 65536  
 SOLVENT CDCl3  
 NS 8  
 DS 2  
 SWH 8403.361 Hz  
 FIDRES 0.128225 Hz  
 AQ 3.8994420 sec  
 RG 406  
 DW 59.500 usec  
 DE 9.10 usec  
 TE 298.1 K  
 D1 1.00000000 sec  
 TD0 1

==== CHANNEL f1 =====  
 SF01 600.3233018 MHz  
 NUC1 1H  
 P1 14.80 usec  
 F2 - Processing parameters  
 SI 65536  
 SF 600.3200157 MHz  
 WDW EM  
 SSB 0  
 LB 0.30 Hz  
 GB 0  
 PC 1.00

Compound 1e 13CNMR



Current Data Parameters  
 NAME 6methoxy piv  
 EXPNO 2  
 PROCNO 1

F2 - Acquisition Parameters  
 Date\_ 20121125  
 Time\_ 23.58

INSTRUM spect  
 PROBHD 5 mm PABBO BB-  
 PULPROG zgpg55  
 TD 65536  
 SOLVENT CDCl3  
 NS 2048  
 DS 4  
 SWH 34722.223 Hz  
 FIDRES 0.529819 Hz  
 AQ 0.9437684 sec  
 RG 2050  
 DW 14.400 usec  
 DE 8.88 usec  
 TE 298.1 K  
 D1 1.10000002 sec  
 D11 0.03000000 sec  
 TD0 1

==== CHANNEL f1 =====  
 SF01 150.9656784 MHz  
 NUC1 13C  
 P1 9.00 usec

F2 - Processing parameters  
 SI 32768  
 SF 150.9505840 MHz  
 WDW EM  
 SSB 0  
 LB 1.00 Hz  
 GB 0  
 PC 1.40

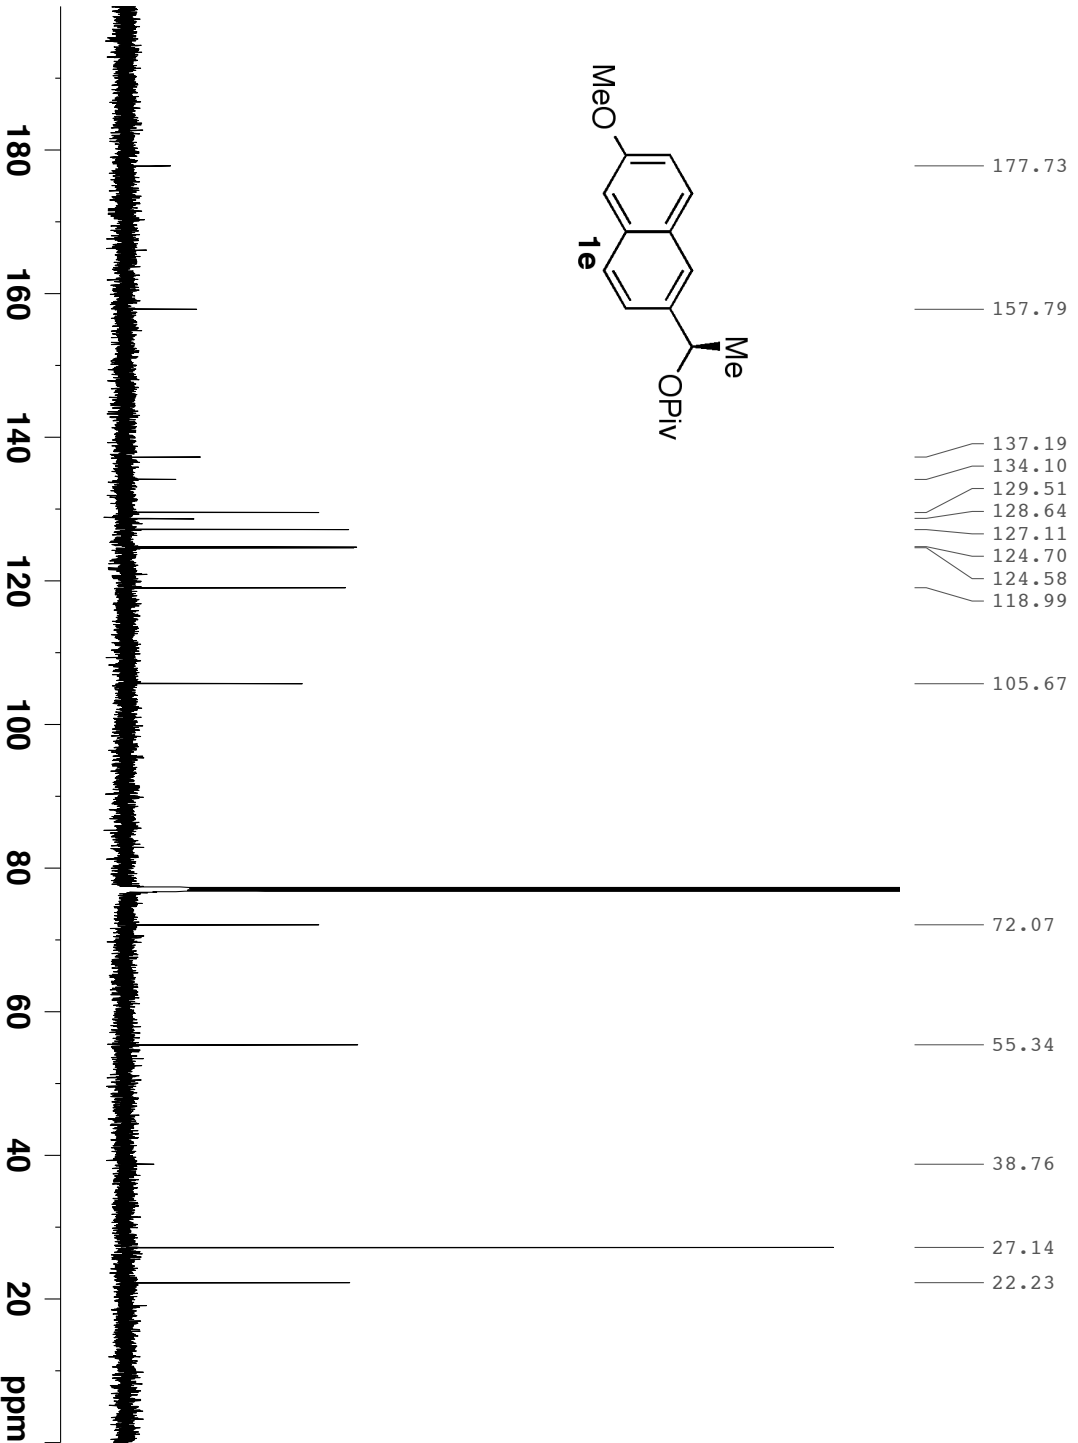

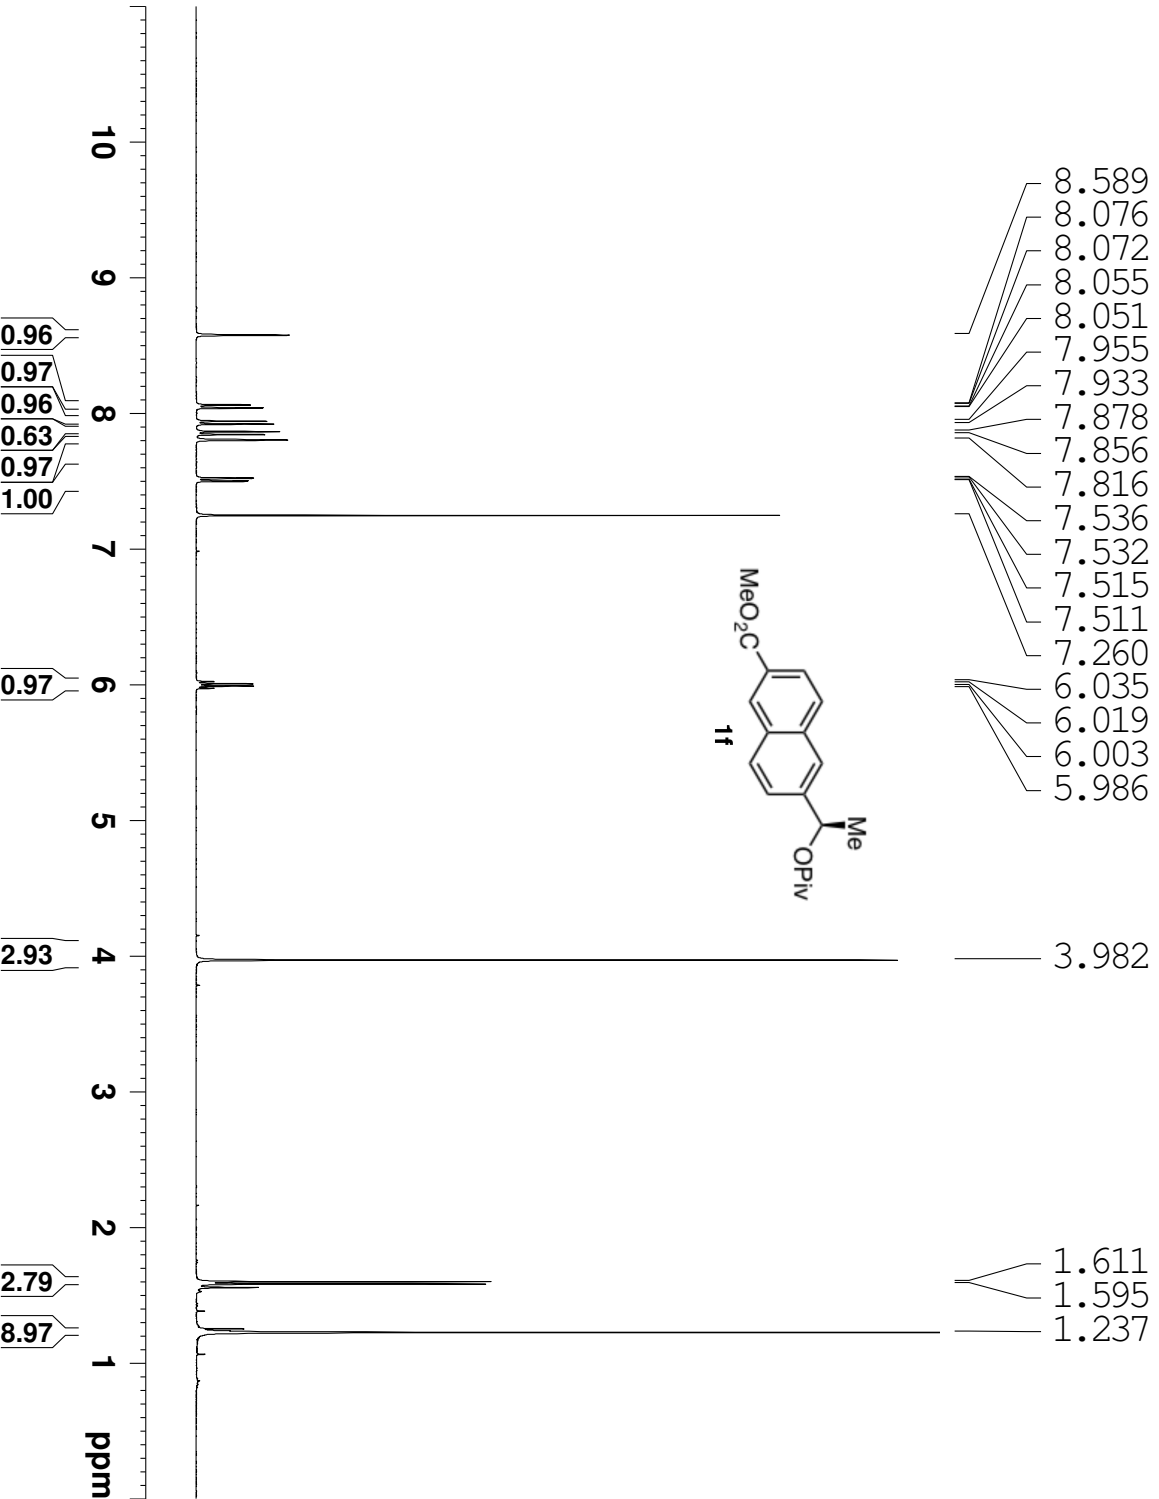

- 8.080
- 8.076
- 8.072
- 8.055
- 8.051
- 7.955
- 7.933
- 7.878
- 7.856
- 7.816
- 7.536
- 7.532
- 7.515
- 7.511
- 7.260
- 6.035
- 6.019
- 6.003
- 5.986

- 3.982
- 1.611
- 1.595
- 1.237

Current Data Parameters  
 NAME HH-4-140  
 EXPNO 1  
 PROCNO 1

F2 - Acquisition Parameters  
 Date\_ 20130122  
 Time 15.23  
 INSTRUM spect  
 PROBHD 5 mm CPNP 1H/  
 PULPROG zg30  
 TD 65536  
 SOLVENT CDCl3  
 NS 16  
 DS 2  
 SWH 8278.146 Hz  
 FIDRES 0.126314 Hz  
 AQ 3.9584243 sec  
 RG 9  
 DW 60.400 usec  
 DE 6.00 usec  
 TE 298.2 K  
 D1 1.0000000 sec  
 TD0 1

CHANNEL f1  
 NUC1 1H  
 P1 15.00 usec  
 PL1 4.90 dB  
 PL1W 3.30822015 W  
 SFO1 400.1324710 MHz  
 F2 - Processing parameters  
 SI 32768  
 SF 400.1300140 MHz  
 WDW EM  
 SSB 0  
 LB 0.30 Hz  
 GB 0  
 PC 1.00

compound 1f 13CNMR



Current Data Parameters  
 NAME HH-4-140  
 EXPNO 2  
 PROCNO 1

F2 - Acquisition Parameters  
 Date\_ 20130123  
 Time 1.17

INSTRUM spect  
 PROBD 5 mm CPNP 1H/  
 PULPROG zgpg30  
 TD 65536  
 SOLVENT CDCl3  
 NS 1024  
 DS 4  
 SWH 23980.814 Hz  
 FIDRES 0.365918 Hz  
 AQ 1.3664756 sec  
 RG 512  
 DW 20.850 usec  
 DE 18.00 usec  
 TE 298.2 K  
 D1 2.0000000 sec  
 D11 0.03000000 sec  
 TDO 1

CHANNEL f1  
 NUC1 13C  
 P1 9.25 usec  
 PL1 0.55 dB  
 PL1W 35.18820572 W  
 SFO1 100.62282298 MHz

CHANNEL f2  
 CPDPRG2 waltz16  
 NUC2 1H  
 PCPD2 90.00 usec  
 PL2 4.90 dB  
 PL12 20.46 dB  
 PL13 21.00 dB  
 PL2W 3.308222015 W  
 PL12W 0.09195905 W  
 PL13W 0.08120718 W  
 SFO2 400.1316005 MHz

F2 - Processing parameters  
 SI 32768  
 SF 100.6127690 MHz  
 WDW EM  
 SSB 0  
 LB 1.00 Hz  
 GB 0  
 PC 1.40

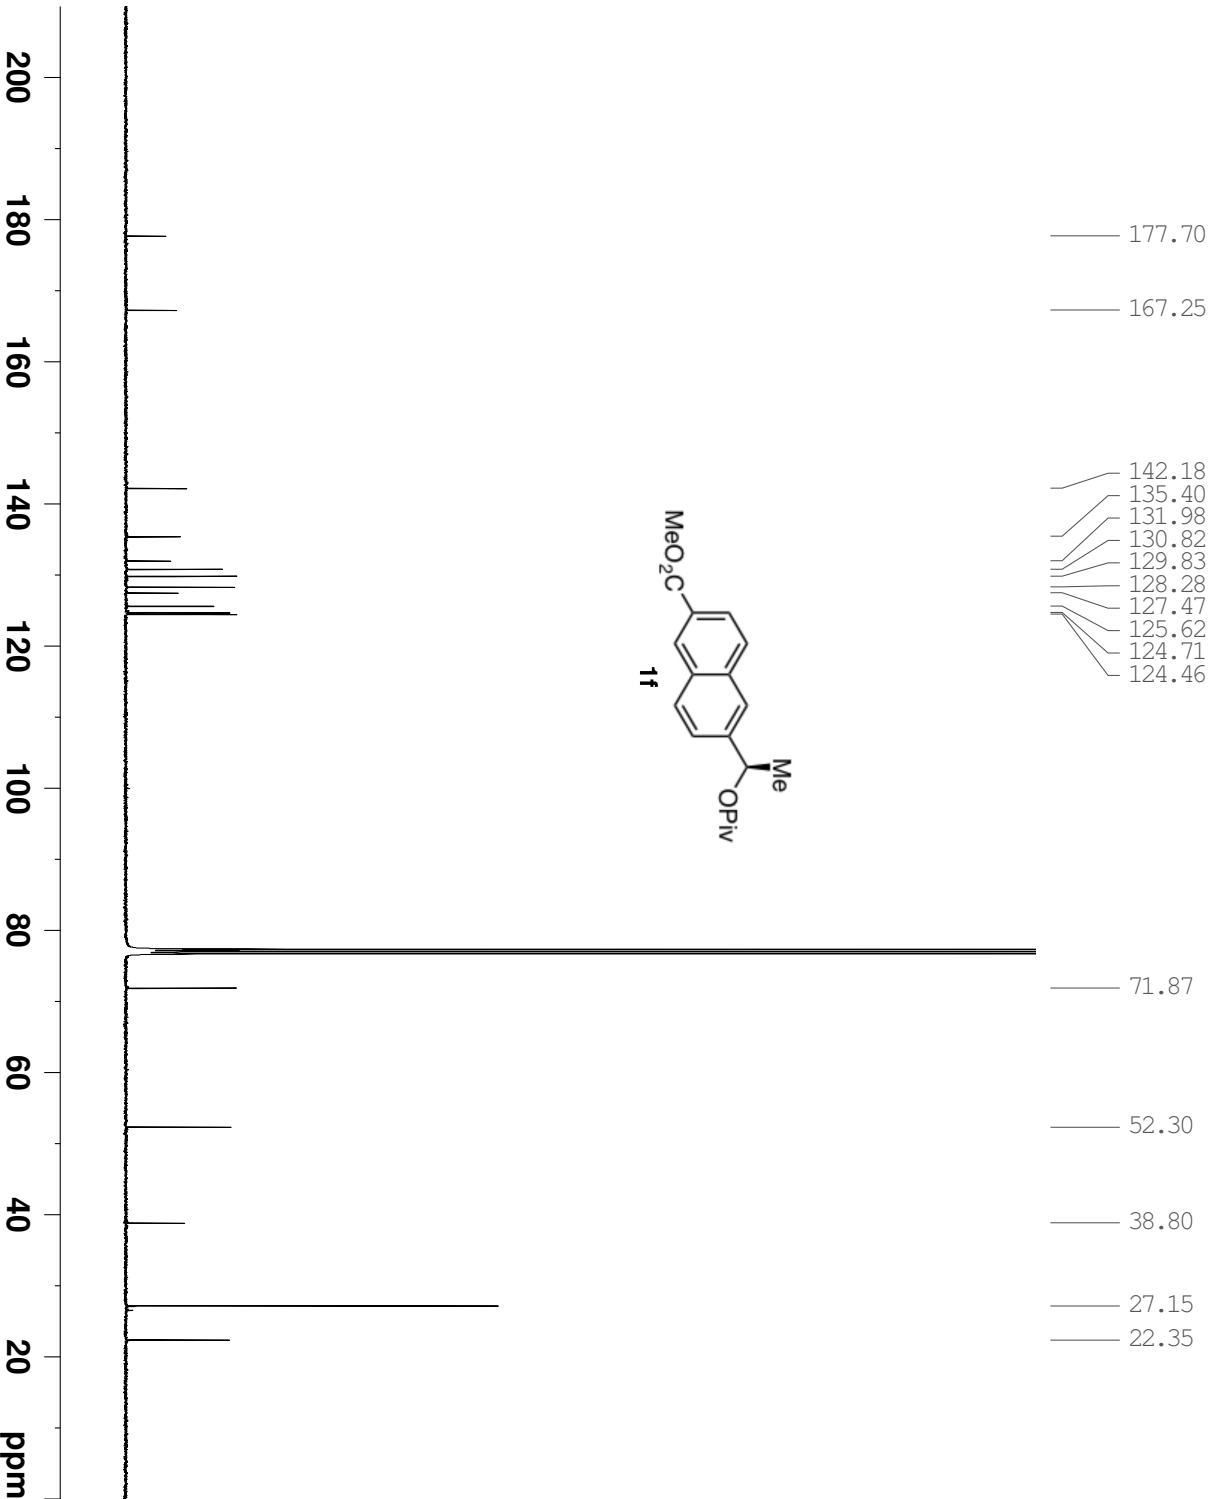



compound 1g 1HNMR



Current Data Parameters  
 NAME HH-4-142  
 EXPNO 1  
 PROCNO 1

F2 - Acquisition Parameters

Date\_ 20130124  
 Time 0.23  
 INSTRUM spect  
 PROBHD 5 mm CPNP 1H/  
 PULPROG zg30  
 TD 65536  
 SOLVENT CDCl3  
 NS 16  
 DS 2  
 SWH 8278.146 Hz  
 FIDRES 0.126314 Hz  
 AQ 3.9584243 sec  
 RG 12.7  
 DW 60.400 usec  
 DE 6.00 usec  
 TE 298.2 K  
 D1 1.0000000 sec  
 TD0 1

CHANNEL f1

NUC1 1H  
 P1 15.00 usec  
 PL1 4.90 dB  
 PL1W 3.30822015 W  
 SFO1 400.1324710 MHz

F2 - Processing parameters

SI 32768  
 SF 400.1300111 MHz  
 WDW EM  
 SSB 0  
 LB 0.30 Hz  
 GB 0  
 PC 1.00

- 8.213
- 7.912
- 7.902
- 7.890
- 7.880
- 7.823
- 7.623
- 7.619
- 7.602
- 7.598
- 7.595
- 7.590
- 7.573
- 7.569
- 6.025
- 6.009
- 5.992
- 5.976

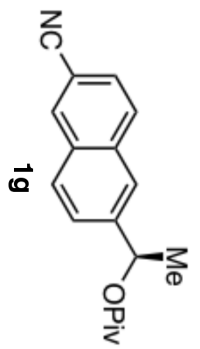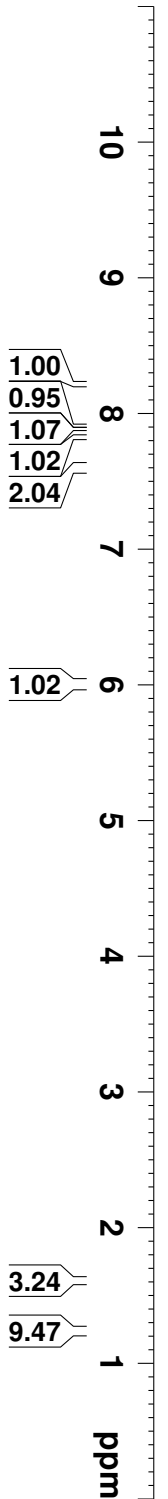

- 1.608
- 1.592
- 1.232

compound 19 13CNMR

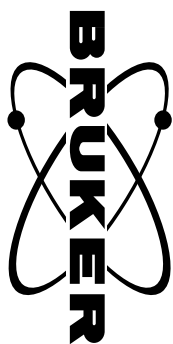

Current Data Parameters  
 NAME HF-4-142  
 EXPNO 2  
 PROCNO 1

F2 - Acquisition Parameters  
 Date\_ 20130124  
 Time 0.39

INSTRUM spect  
 PROBD 5 mm CPNP 1H/  
 PULPROG zgpg30  
 TD 65536  
 SOLVENT CDCl3  
 NS 256  
 DS 4  
 SWH 23980.814 Hz  
 FIDRES 0.365918 Hz  
 AQ 1.3664756 sec  
 RG 512  
 DW 20.850 usec  
 DE 18.00 usec  
 TE 298.2 K  
 D1 2.0000000 sec  
 D11 0.03000000 sec  
 TD0 1

CHANNEL F1  
 NUC1 13C  
 P1 9.25 usec  
 PL1 0.55 dB  
 PL1W 35.18820572 W  
 SFO1 100.62282298 MHz

CHANNEL F2  
 CPDPRG2 waltz16  
 NUC2 1H  
 PCPD2 90.00 usec  
 PL2 4.90 dB  
 PL12 20.46 dB  
 PL13 21.00 dB  
 PL2W 3.308222015 W  
 PL12W 0.09195905 W  
 PL13W 0.08120718 W  
 SFO2 400.1316005 MHz

F2 - Processing parameters  
 SI 32768  
 SF 100.6127690 MHz  
 WDW EM  
 SSB 0  
 LB 1.00 Hz  
 GB 0  
 PC 1.40

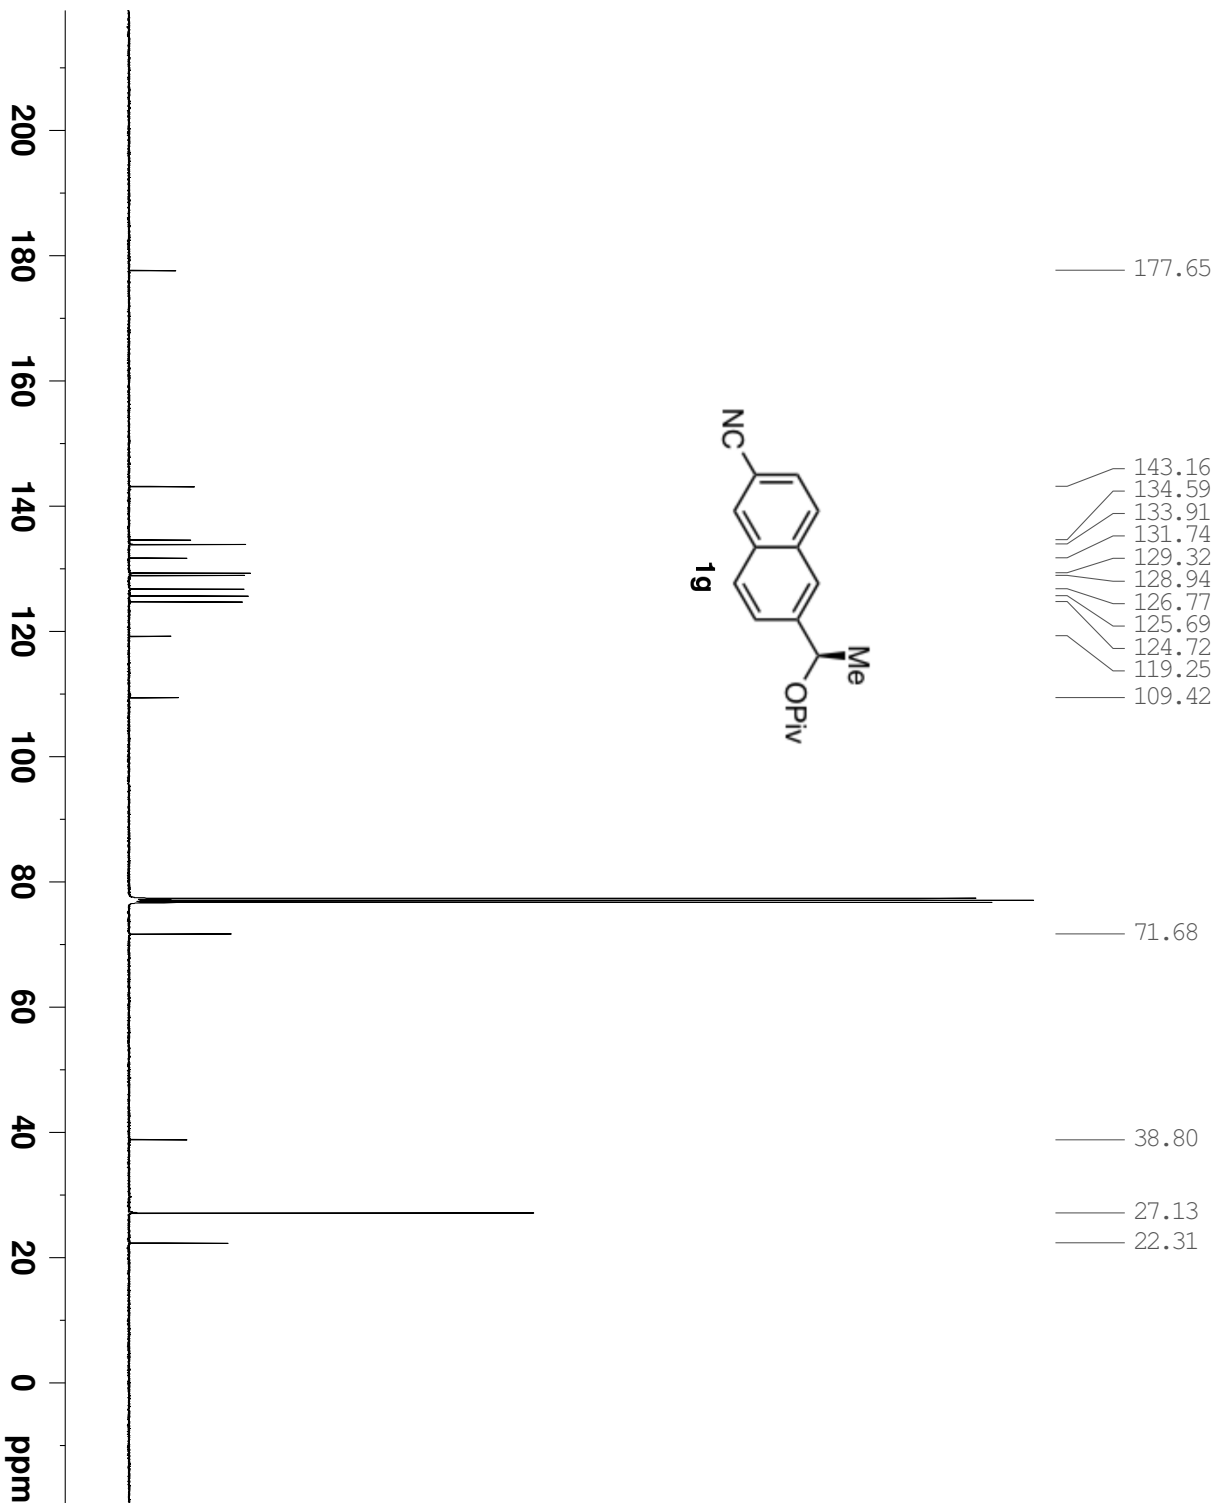

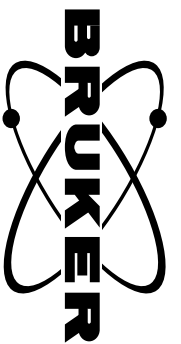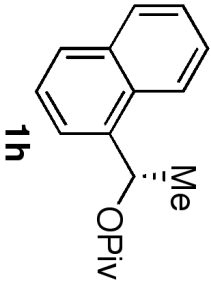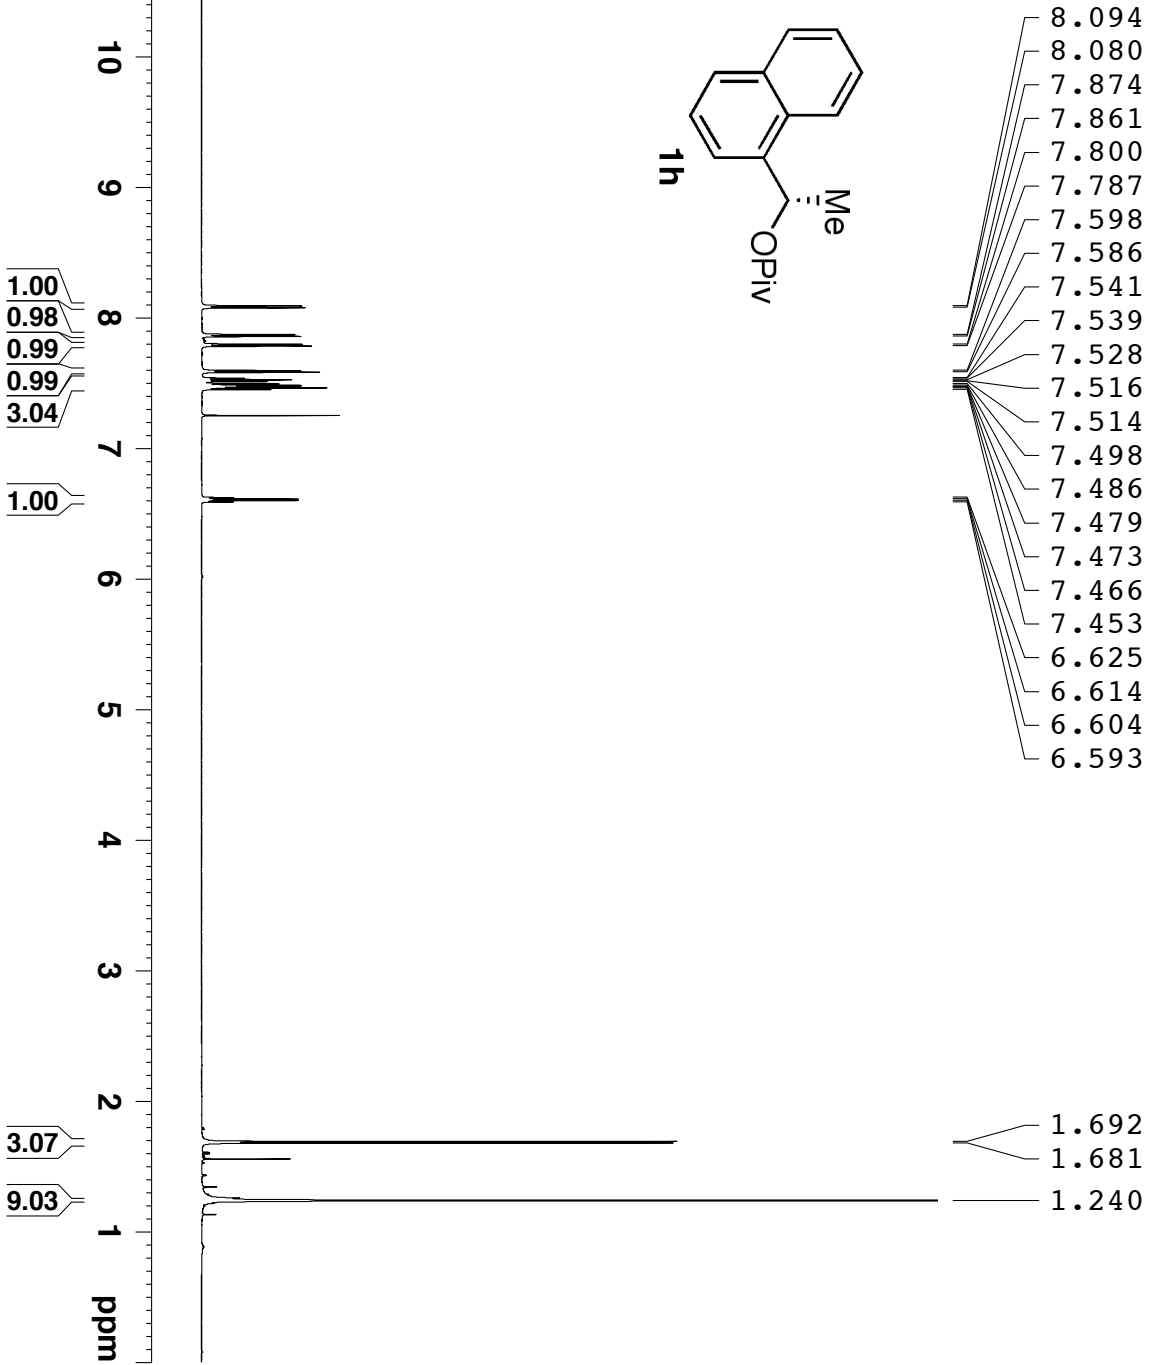

Current Data Parameters  
 NAME QZ-Compound 1f 1HNMR  
 EXPNO 1  
 PROCNO 1

F2 - Acquisition Parameters  
 Date\_ 20121210  
 Time 9.04  
 INSTRUM spect  
 PROBHD 5 mm PABBO BB/  
 PULPROG zg30  
 TD 65536  
 SOLVENT CDCl3  
 NS 8  
 DS 2  
 SWH 8403.361 Hz  
 FIDRES 0.128225 Hz  
 AO 3.8994420 sec  
 RG 90.5  
 DE 59.500 usec  
 TE 17.39 usec  
 D1 298.1 K  
 D1 1.00000000 sec  
 TD0 1

==== CHANNEL f1 =====  
 SF01 600.3233018 MHz  
 NUC1 1H  
 P1 10.77 usec

F2 - Processing parameters  
 SI 65536  
 SF 600.3200200 MHz  
 WDW EM  
 SSB 0  
 LB 0.30 Hz  
 GB 0  
 PC 1.00

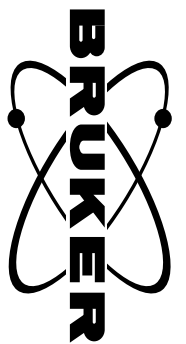

Compound 1h <sup>13</sup>CNMR

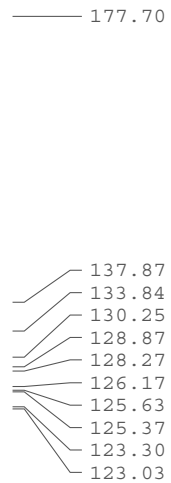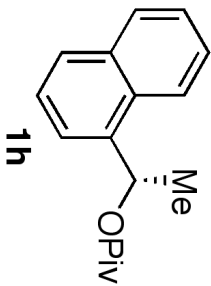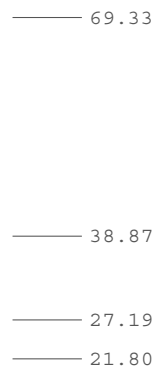

Current Data Parameters  
NAME HH-4-077  
EXPNO 3  
PROCNO 1

F2 - Acquisition Parameters  
Date\_ 20121129  
Time\_ 20.50

INSTRUM spect  
PROBHD 5 mm PABBO BB-  
PULPROG zgpg55  
TD 65536  
SOLVENT CDCl3  
NS 2048  
DS 4

SWH 34722.223 Hz  
FIDRES 0.529819 Hz  
AQ 0.9437684 sec

RG 1030  
DW 14.400 usec  
DE 8.88 usec  
TE 298.1 K  
D1 1.10000002 sec  
D11 0.03000000 sec  
TD0 1

==== CHANNEL f1 =====  
SFO1 150.9656784 MHz  
NUC1 13C  
P1 9.00 usec

F2 - Processing parameters  
SI 32768  
SF 150.9505840 MHz  
WDW EM  
SSB 0  
LB 1.00 Hz  
GB 0  
PC 1.40

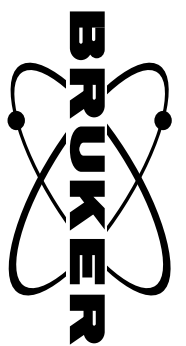

Compound 1i 1HNMR

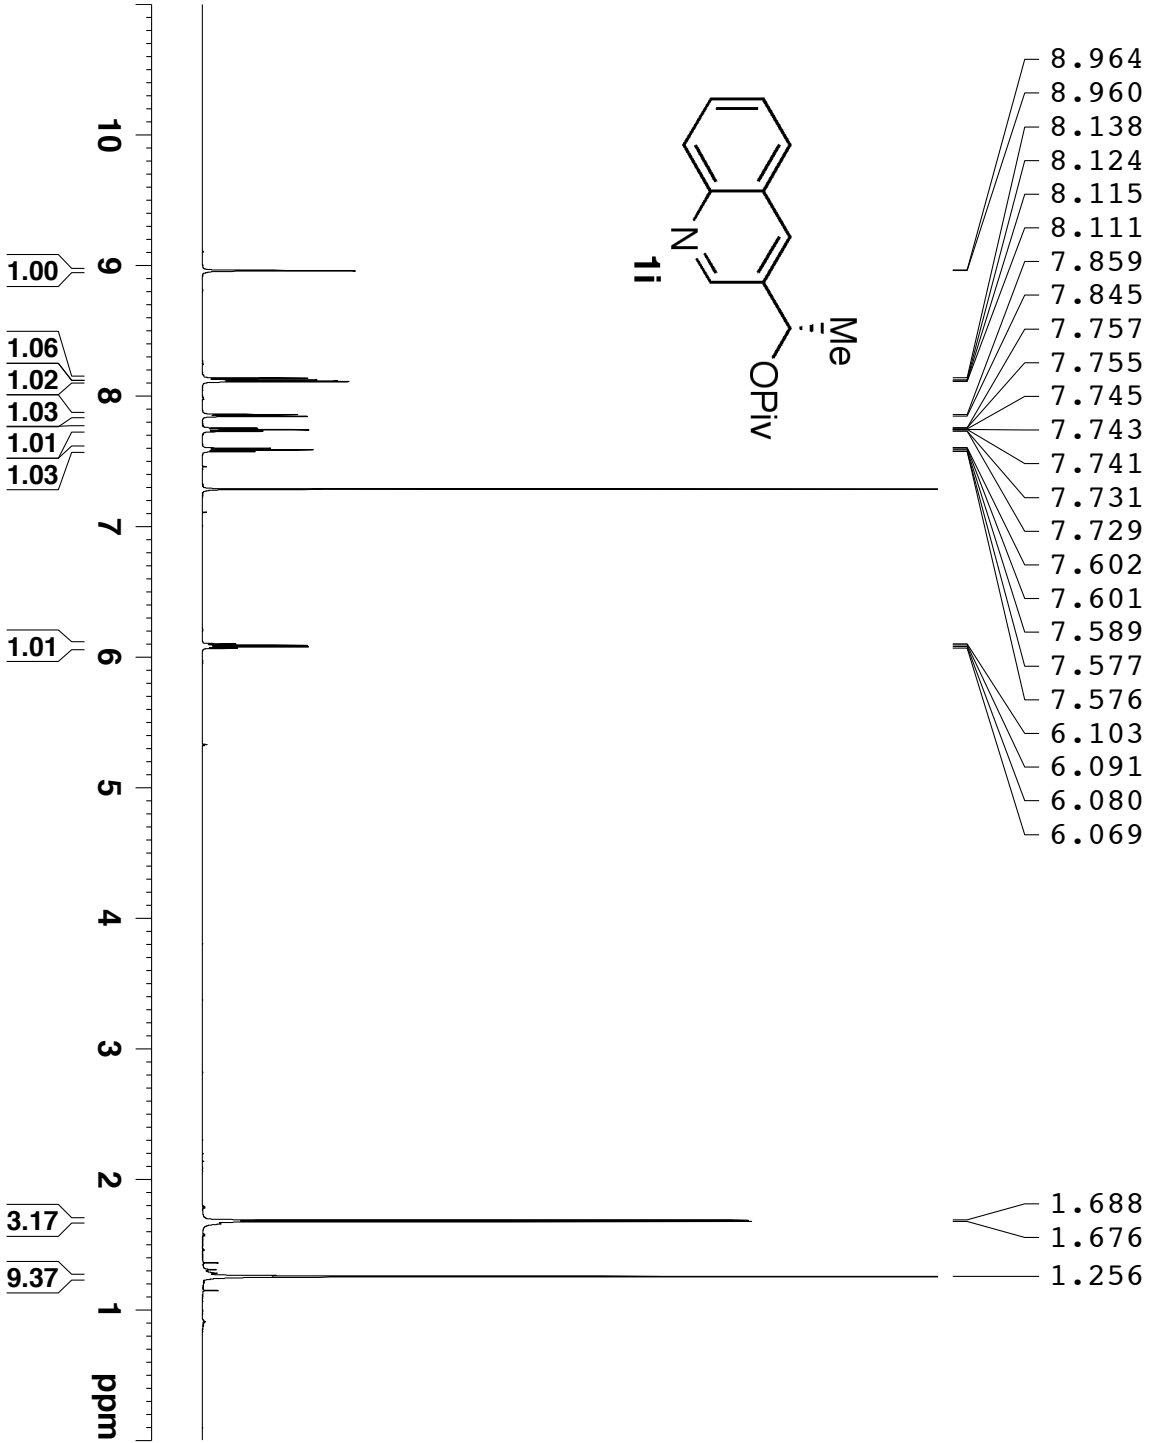

Current Data Parameters  
 NAME QZ-2-290-2  
 EXPNO 1  
 PROCNO 1

F2 - Acquisition Parameters  
 Date\_ 20121203  
 Time\_ 22.51  
 INSTRUM spect  
 PROBHD 5 mm PABBO BB/  
 PULPROG zg30  
 TD 65536  
 SOLVENT CDCl3  
 NS 8  
 DS 2  
 SWH 8403.361 Hz  
 FIDRES 0.128225 Hz  
 AQ 3.8994420 sec  
 RG 161  
 DW 59.500 usec  
 DE 17.39 usec  
 TE 298.1 K  
 D1 1.00000000 sec  
 TD0 1

==== CHANNEL f1 =====  
 SFO1 600.3233018 MHz  
 NUC1 1H  
 P1 10.77 usec  
 F2 - Processing parameters  
 SI 65536  
 SF 600.3200000 MHz  
 WDW EM  
 SSB 0  
 LB 0.30 Hz  
 GB 0  
 PC 1.00

Compound 1i 13CNMR

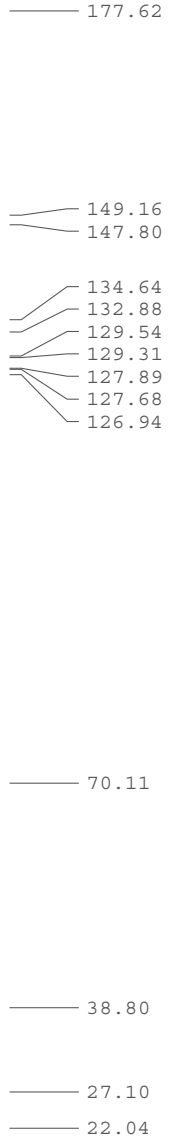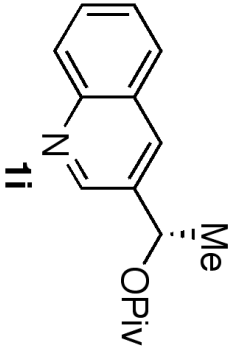

Current Data Parameters  
 NAME QZ-2-290-2  
 EXPNO 2  
 PROCNO 1

F2 - Acquisition Parameters  
 Date\_ 20121203  
 Time\_ 23.01  
 INSTRUM spect  
 PROBHD 5 mm PABBO BB/  
 PULPROG zgpg55  
 TD 65536  
 SOLVENT CDCl3  
 NS 256  
 DS 4  
 SWH 34722.223 Hz  
 FIDRES 0.529819 Hz  
 AQ 0.9437684 sec  
 RG 2050  
 DW 14.400 usec  
 DE 19.34 usec  
 TE 298.1 K  
 D1 1.10000002 sec  
 D11 0.03000000 sec  
 TD0 1

==== CHANNEL f1 =====  
 SF01 150.9656784 MHz  
 NUC1 13C  
 P1 10.63 usec

F2 - Processing parameters  
 SI 32768  
 SF 150.9505840 MHz  
 WDW EM  
 SSB 0  
 LB 1.00 Hz  
 GB 0  
 PC 1.40

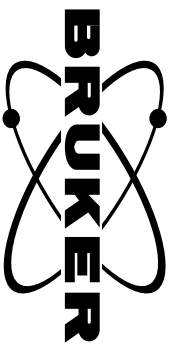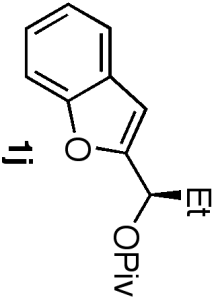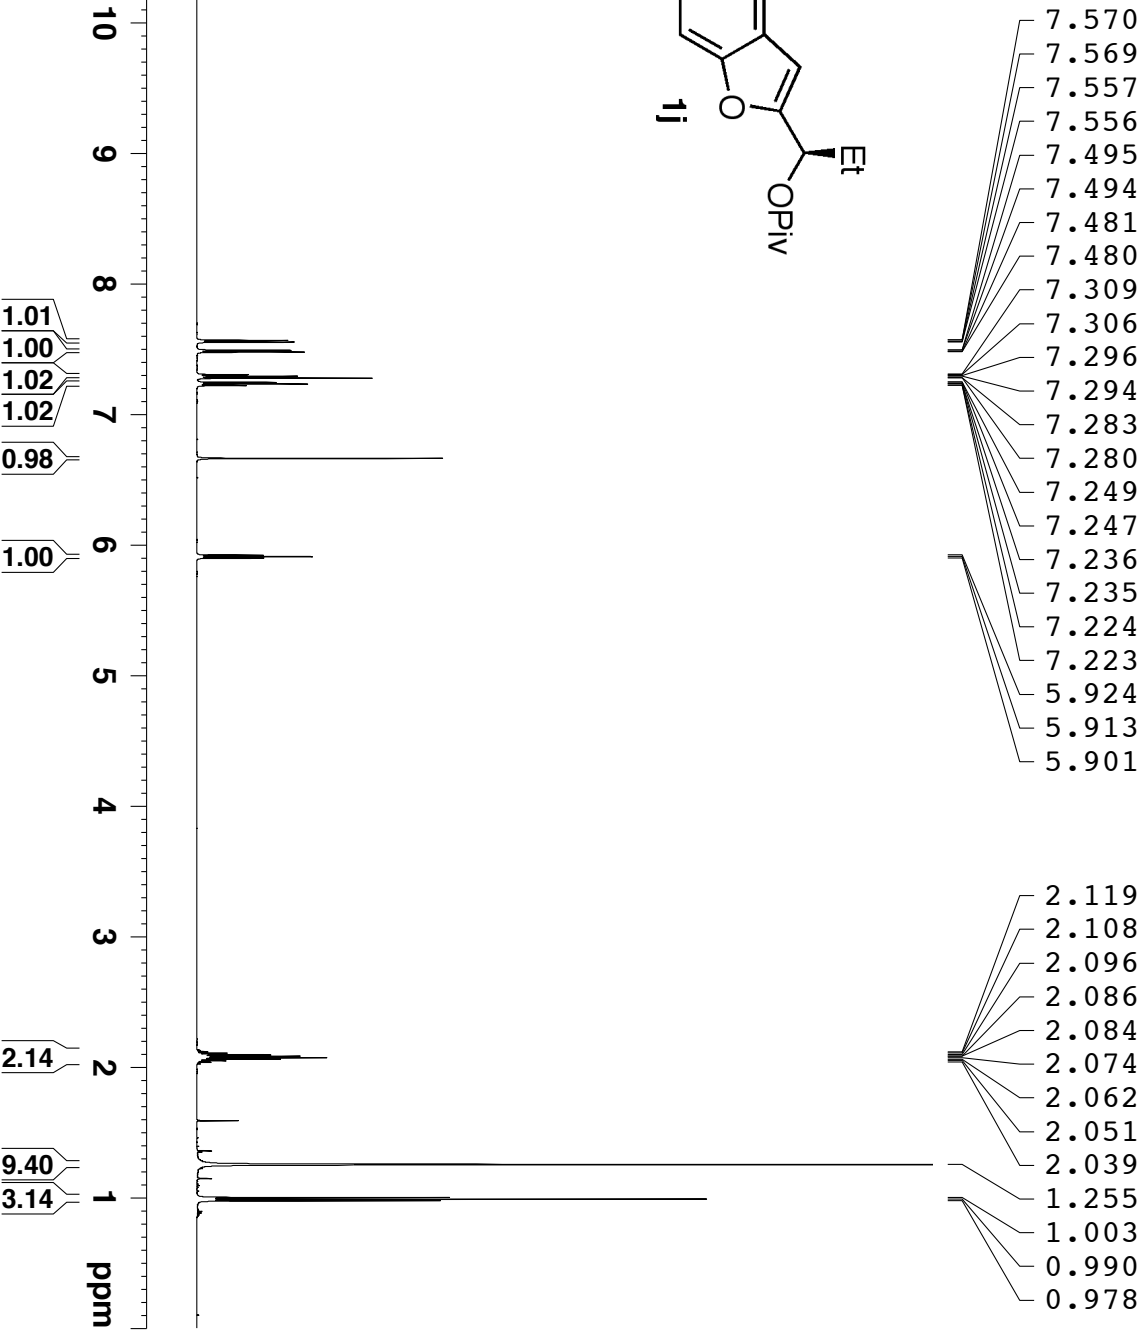

7.570  
7.569  
7.557  
7.556  
7.495  
7.494  
7.481  
7.480  
7.309  
7.306  
7.296  
7.294  
7.283  
7.280  
7.249  
7.247  
7.236  
7.235  
7.224  
7.223  
5.924  
5.913  
5.901

2.119  
2.108  
2.096  
2.086  
2.084  
2.074  
2.062  
2.051  
2.039  
1.255  
1.003  
0.990  
0.978

1.01  
1.00  
1.02  
1.02  
0.98

1.00

2.14

9.40  
3.14

Current Data Parameters  
NAME QZ-Compound-1h  
EXPNO 1  
PROCNO 1

F2 - Acquisition Parameters

Date\_ 20121209  
Time 12.06  
INSTRUM spect  
PROBHD 5 mm PABBO BB/  
PULPROG zg30  
TD 65536  
SOLVENT CDCl3  
NS 8  
DS 2  
SWH 8403.361 Hz  
FIDRES 0.128225 Hz  
AQ 3.8994420 sec  
RG 57  
DW 59.500 usec  
DE 17.39 usec  
TE 298.1 K  
D1 1.00000000 sec  
TD0 1

==== CHANNEL f1 =====  
SFO1 600.3233018 MHz  
NUC1 1H  
P1 10.77 usec

F2 - Processing parameters  
SI 65536  
SF 600.3200046 MHz  
WDW EM  
SSB 0  
LB 0.30 Hz  
GB 0  
PC 1.00

Compound 1j 13CNMR

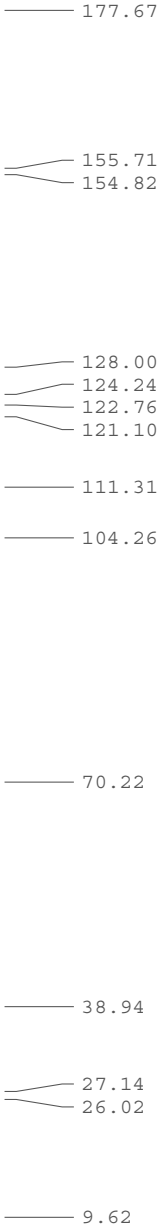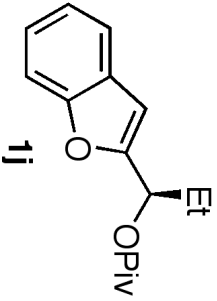

Current Data Parameters  
 NAME QZ-Compound-1h  
 EXPNO 2  
 PROCNO 1

F2 - Acquisition Parameters  
 Date\_ 20121209  
 Time 12.16  
 INSTRUM spect  
 PROBHD 5 mm PABBO BB/  
 PULPROG zgpg55  
 TD 65536  
 SOLVENT CDCl3  
 NS 256  
 DS 4  
 SWH 34722.223 Hz  
 FIDRES 0.529819 Hz  
 AQ 0.9437684 sec  
 RG 2050  
 DW 14.400 usec  
 DE 19.34 usec  
 TE 298.1 K  
 D1 1.10000002 sec  
 D11 0.03000000 sec  
 TD0 1

==== CHANNEL f1 =====  
 SFO1 150.9656784 MHz  
 NUC1 13C  
 P1 10.63 usec  
 F2 - Processing parameters  
 SI 32768  
 SF 150.9505840 MHz  
 WDW EM  
 SSB 0  
 LB 1.00 Hz  
 GB 0  
 PC 1.40



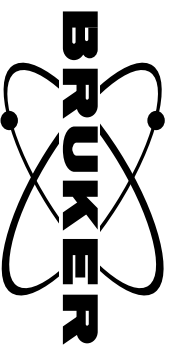

Compound 1k 1HNMR

Current Data Parameters  
NAME QZ-3-145-1  
EXPNO 1  
PROCNO 1

F2 - Acquisition Parameters  
Date\_ 20121201  
Time\_ 17.19  
INSTRUM spect  
PROBHD 5 mm PABBO BB-  
PULPROG zg30  
TD 65536  
SOLVENT CDCl3  
NS 8  
DS 2  
SWH 8403.361 Hz  
FIDRES 0.128225 Hz  
AQ 3.8994420 sec  
RG 287  
DW 59.500 usec  
DE 9.10 usec  
TE 298.1 K  
D1 1.00000000 sec  
TD0 1

==== CHANNEL f1 =====  
SF01 600.3233018 MHz  
NUC1 1H  
P1 14.80 usec  
F2 - Processing parameters  
SI 65536  
SF 600.3200000 MHz  
WDW EM  
SSB 0  
LB 0.30 Hz  
GB 0  
PC 1.00

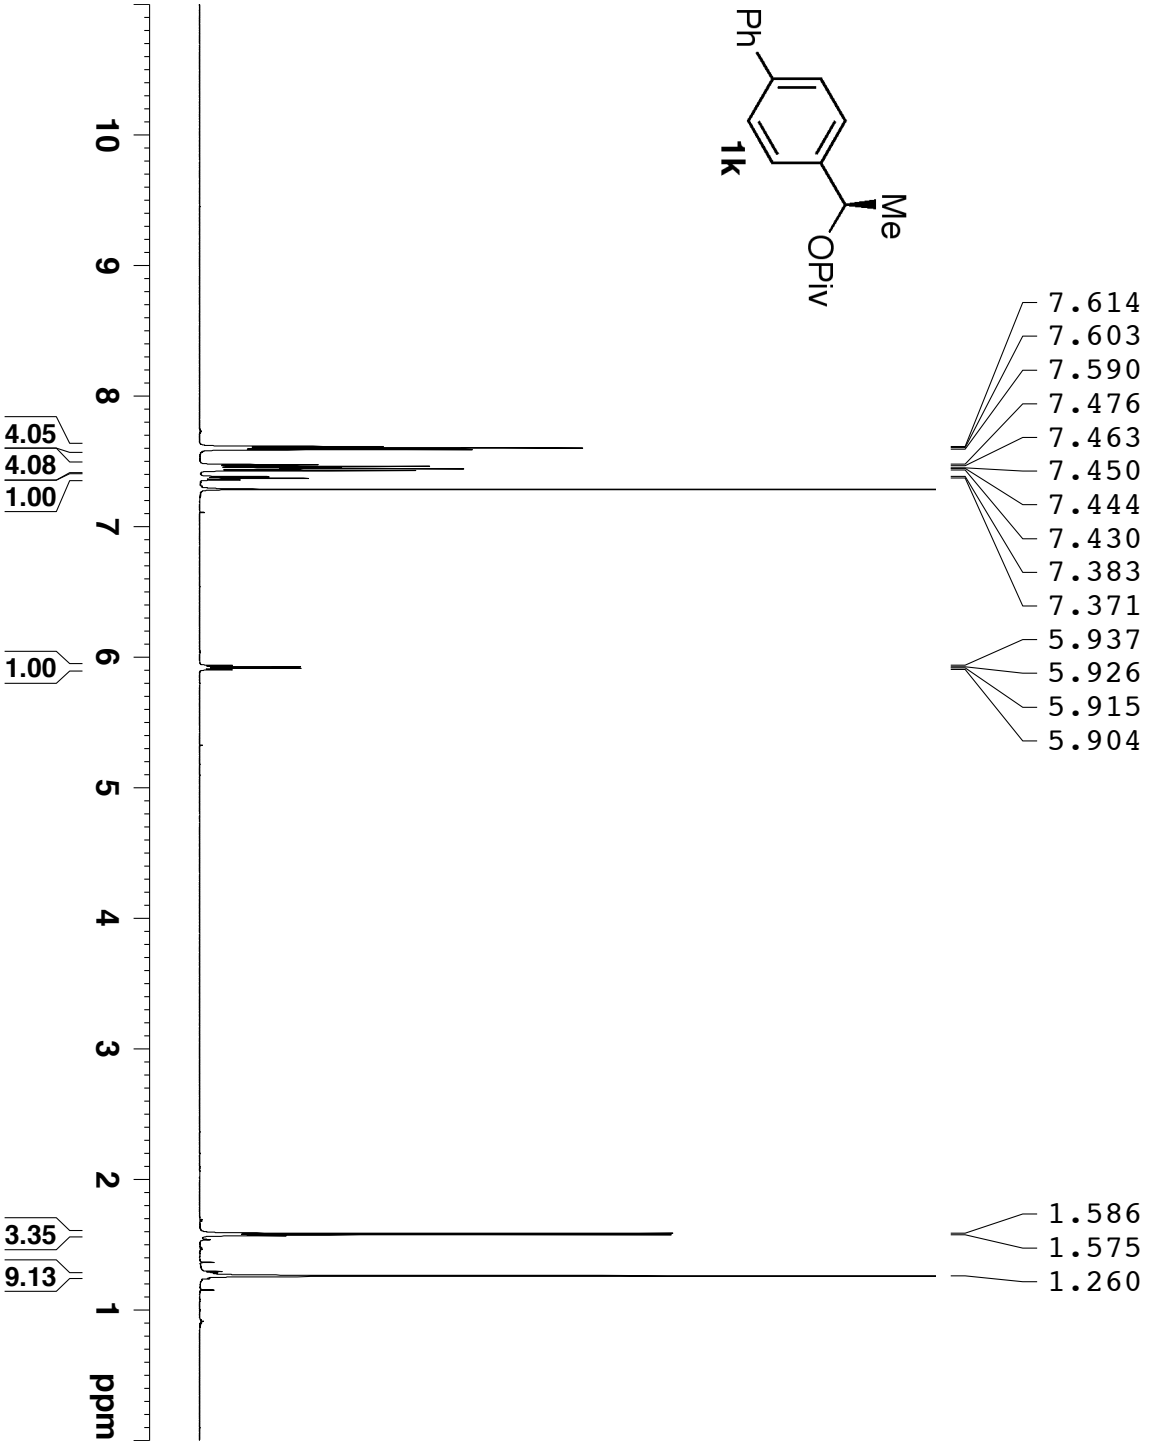

Compound 1k 13CNMR



S110

Current Data Parameters  
 NAME QZ-3-145-1  
 EXPNO 2  
 PROCNO 1

F2 - Acquisition Parameters  
 Date\_ 20121201  
 Time\_ 17.29

INSTRUM spect  
 PROBHD 5 mm PABBO BB-  
 PULPROG zgpg55  
 TD 65536  
 SOLVENT CDCl3  
 NS 256  
 DS 4  
 SWH 34722.223 Hz  
 FIDRES 0.529819 Hz  
 AO 0.9437684 sec  
 RG 2050  
 DW 14.400 usec  
 DE 8.88 usec  
 TE 298.1 K  
 D1 1.10000002 sec  
 D11 0.03000000 sec  
 TD0 1

==== CHANNEL f1 =====  
 SF01 150.9656784 MHz  
 NUC1 13C  
 P1 9.00 usec

F2 - Processing parameters  
 SI 32768  
 SF 150.9505840 MHz  
 WDW EM  
 SSB 0  
 LB 1.00 Hz  
 GB 0  
 PC 1.40

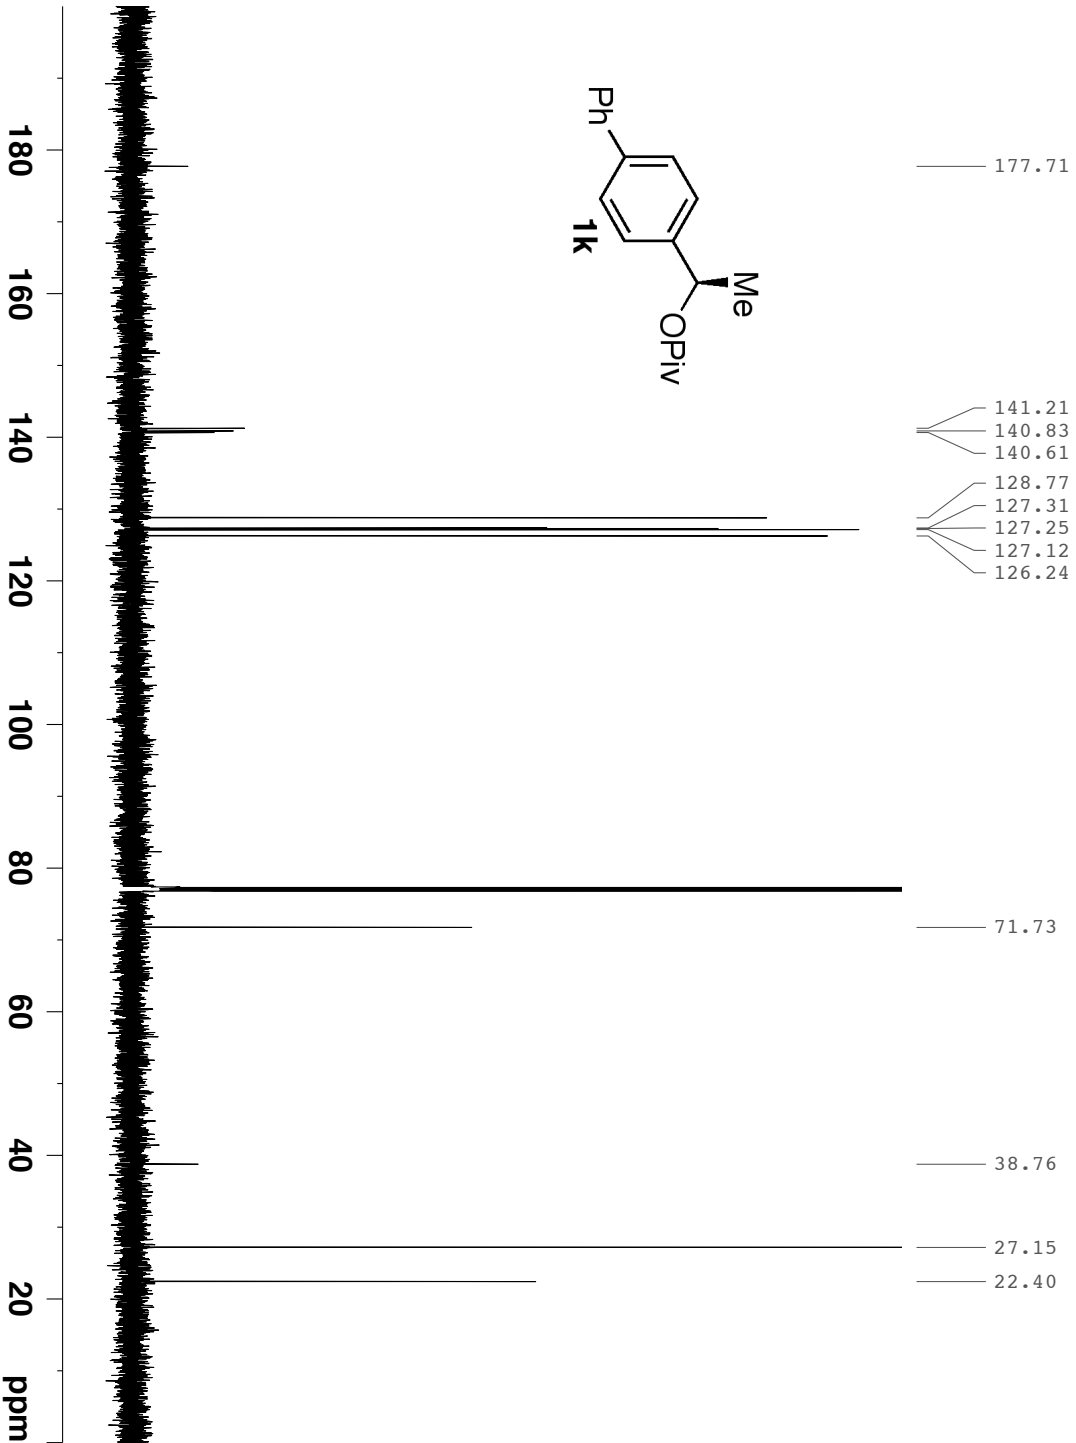

Compound S-6 1H NMR



S111

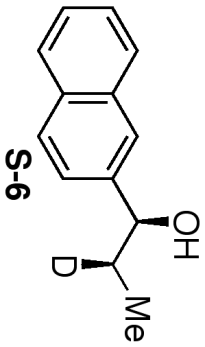

|       |       |       |       |       |       |       |       |       |       |       |       |       |       |       |       |       |       |       |       |       |       |       |       |       |       |       |       |       |       |       |       |       |       |
|-------|-------|-------|-------|-------|-------|-------|-------|-------|-------|-------|-------|-------|-------|-------|-------|-------|-------|-------|-------|-------|-------|-------|-------|-------|-------|-------|-------|-------|-------|-------|-------|-------|-------|
| 7.879 | 7.873 | 7.871 | 7.864 | 7.860 | 7.858 | 7.816 | 7.530 | 7.526 | 7.523 | 7.519 | 7.516 | 7.511 | 7.507 | 7.503 | 7.498 | 7.495 | 7.486 | 7.483 | 4.812 | 4.803 | 1.964 | 1.912 | 1.899 | 1.896 | 1.893 | 1.884 | 1.874 | 1.871 | 1.861 | 1.852 | 1.849 | 0.980 | 0.968 |
|-------|-------|-------|-------|-------|-------|-------|-------|-------|-------|-------|-------|-------|-------|-------|-------|-------|-------|-------|-------|-------|-------|-------|-------|-------|-------|-------|-------|-------|-------|-------|-------|-------|-------|

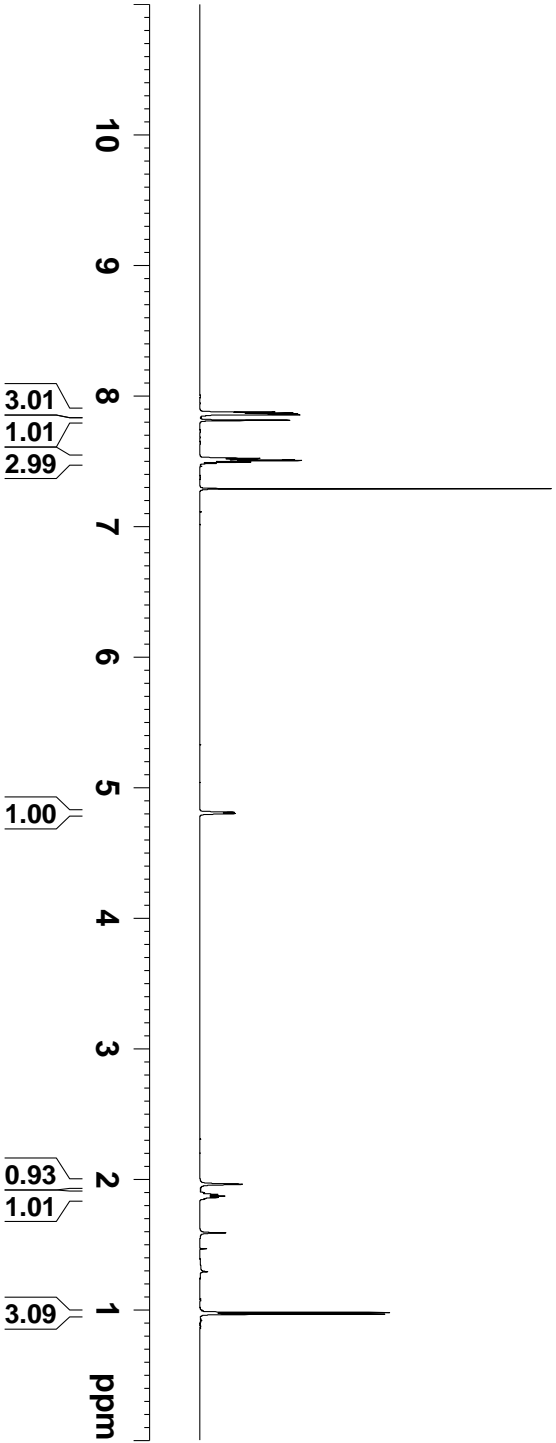

Current Data Parameters  
 NAME QZ-3-132-1  
 EXPNO 3  
 PROCNO 1

F2 - Acquisition Parameters  
 Date\_ 20121203  
 Time\_ 22.38  
 INSTRUM spect  
 PROBHD 5 mm PABBO BB/  
 PULPROG zg30  
 TD 65536  
 SOLVENT CDCl3  
 NS 8  
 DS 2  
 SWH 8403.361 Hz  
 FIDRES 0.128225 Hz  
 AQ 3.8994420 sec  
 RG 144  
 DW 59.500 usec  
 DE 17.39 usec  
 TE 298.1 K  
 D1 1.00000000 sec  
 TD0 1

==== CHANNEL f1 =====  
 SFO1 600.3233018 MHz  
 NUC1 1H  
 P1 10.77 usec

F2 - Processing parameters  
 SI 65536  
 SF 600.3199982 MHz  
 WDW EM  
 SSB 0  
 LB 0.30 Hz  
 GB 0  
 PC 1.00

Compound **S-6** <sup>13</sup>C NMR

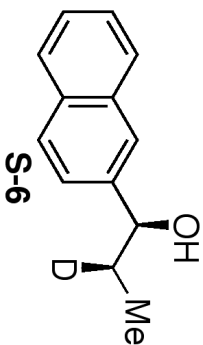

- 141.94
- 133.29
- 133.01
- 128.26
- 127.94
- 127.70
- 126.13
- 125.80
- 124.74
- 124.16

76.11

- 31.54
- 31.41
- 31.28

10.04

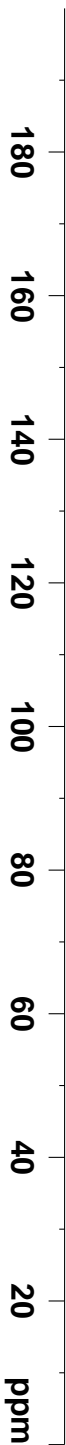

Current Data Parameters  
 NAME QZ-3-132-1  
 EXPNO 4  
 PROCNO 1

F2 - Acquisition Parameters  
 Date\_ 20121203  
 Time\_ 22.48  
 INSTRUM spect  
 PROBHD 5 mm PABBO BB/  
 PULPROG zgpg55  
 TD 65536  
 SOLVENT CDCl3  
 NS 256  
 DS 4  
 SWH 34722.223 Hz  
 FIDRES 0.529819 Hz  
 AQ 0.9437684 sec  
 RG 2050  
 DW 14.400 usec  
 DE 19.34 usec  
 TE 298.1 K  
 D1 1.10000002 sec  
 D11 0.03000000 sec  
 TD0 1

==== CHANNEL f1 =====  
 SFO1 150.9656784 MHz  
 NUC1 13C  
 P1 10.63 usec

F2 - Processing parameters  
 SI 32768  
 SF 150.9505840 MHz  
 WDW EM  
 SSB 0  
 LB 1.00 Hz  
 GB 0  
 PC 1.40

Compound 11 1H NMR

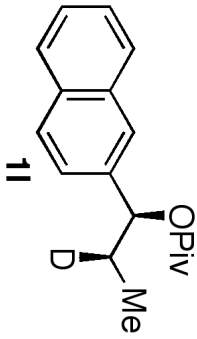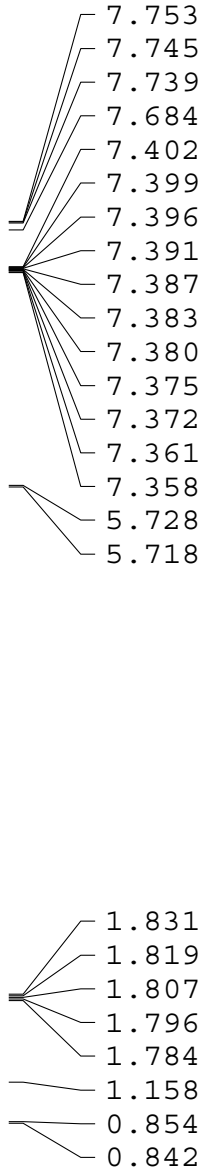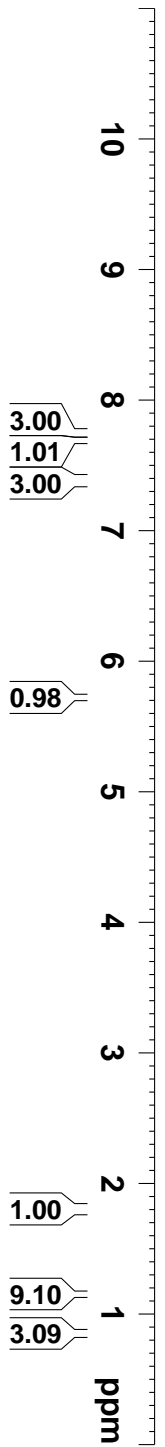

Current Data Parameters  
 NAME QZ-3-156-1  
 EXPNO 1  
 PROCNO 1

F2 - Acquisition Parameters  
 Date\_ 20121205  
 Time\_ 15.54  
 INSTRUM spect  
 PROBHD 5 mm PABBO BB/  
 PULPROG zg30  
 TD 65536  
 SOLVENT CDCl3  
 NS 8  
 DS 2  
 SWH 8403.361 Hz  
 FIDRES 0.128225 Hz  
 AQ 3.8994420 sec  
 RG 114  
 DW 59.500 usec  
 DE 17.39 usec  
 TE 298.1 K  
 D1 1.00000000 sec  
 TD0 1

==== CHANNEL f1 =====  
 SF01 600.3233018 MHz  
 NUC1 1H  
 P1 10.77 usec  
 F2 - Processing parameters  
 SI 65536  
 SF 600.3200641 MHz  
 WDW EM  
 SSB 0  
 LB 0.30 Hz  
 GB 0  
 PC 1.00

Compound 11 <sup>13</sup>CNMR



S114

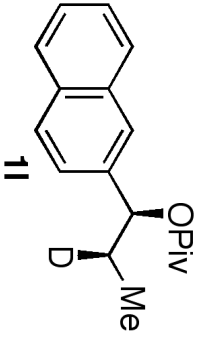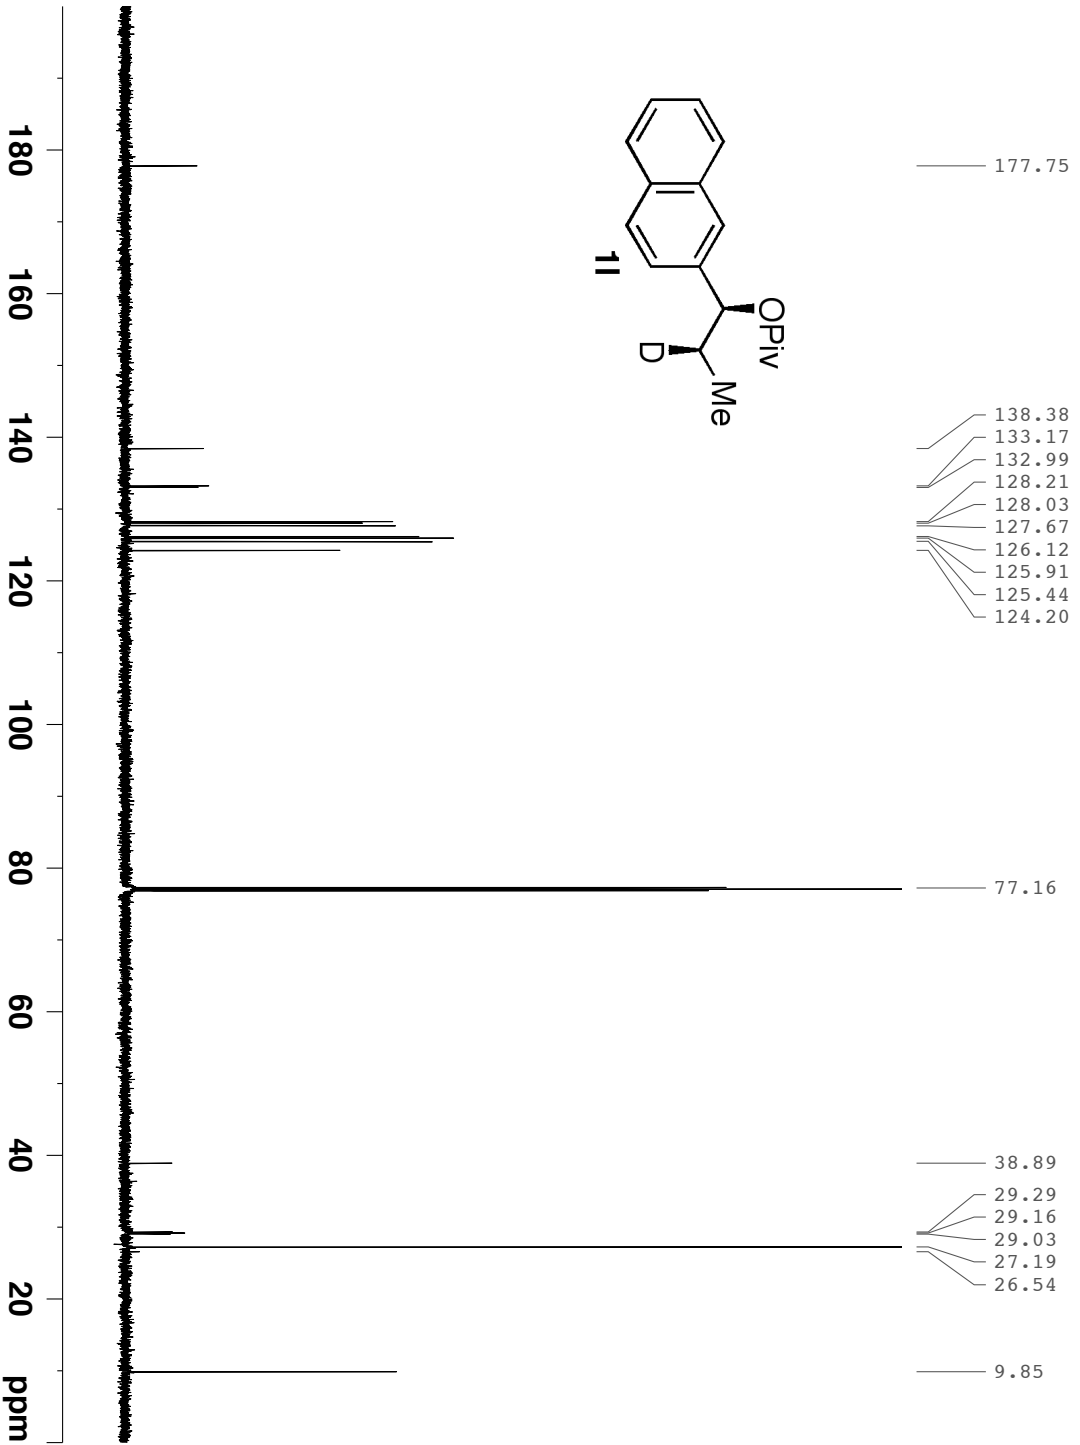

Current Data Parameters  
 NAME QZ-3-156-1  
 EXPNO 2  
 PROCNO 1

F2 - Acquisition Parameters  
 Date\_ 20121205  
 Time\_ 16.04  
 INSTRUM spect  
 PROBHD 5 mm PABBO BB/  
 PULPROG zgpg35  
 TD 65536  
 SOLVENT CDCl3  
 NS 256  
 DS 4  
 SWH 34722.223 Hz  
 FIDRES 0.529819 Hz  
 AQ 0.9437684 sec  
 RG 2050  
 DW 14.400 usec  
 DE 19.34 usec  
 TE 298.1 K  
 D1 1.10000002 sec  
 D11 0.03000000 sec  
 TD0 1

==== CHANNEL f1 =====  
 SF01 150.9656784 MHz  
 NUC1 13C  
 P1 10.63 usec

F2 - Processing parameters  
 SI 32768  
 SF 150.9505840 MHz  
 WDW EM  
 SSB 0  
 LB 1.00 Hz  
 GB 0  
 PC 1.40

Crude <sup>1</sup>H NMR for beta-hydride elimination

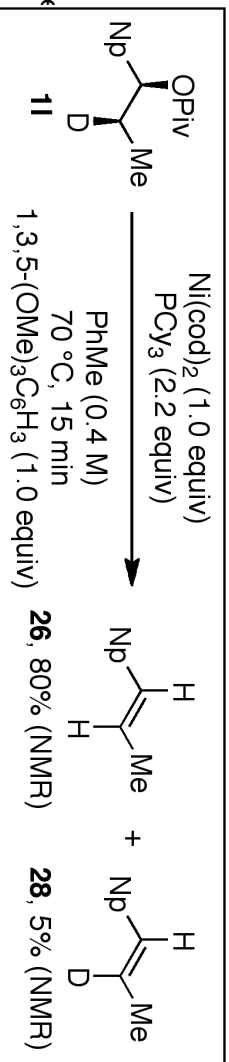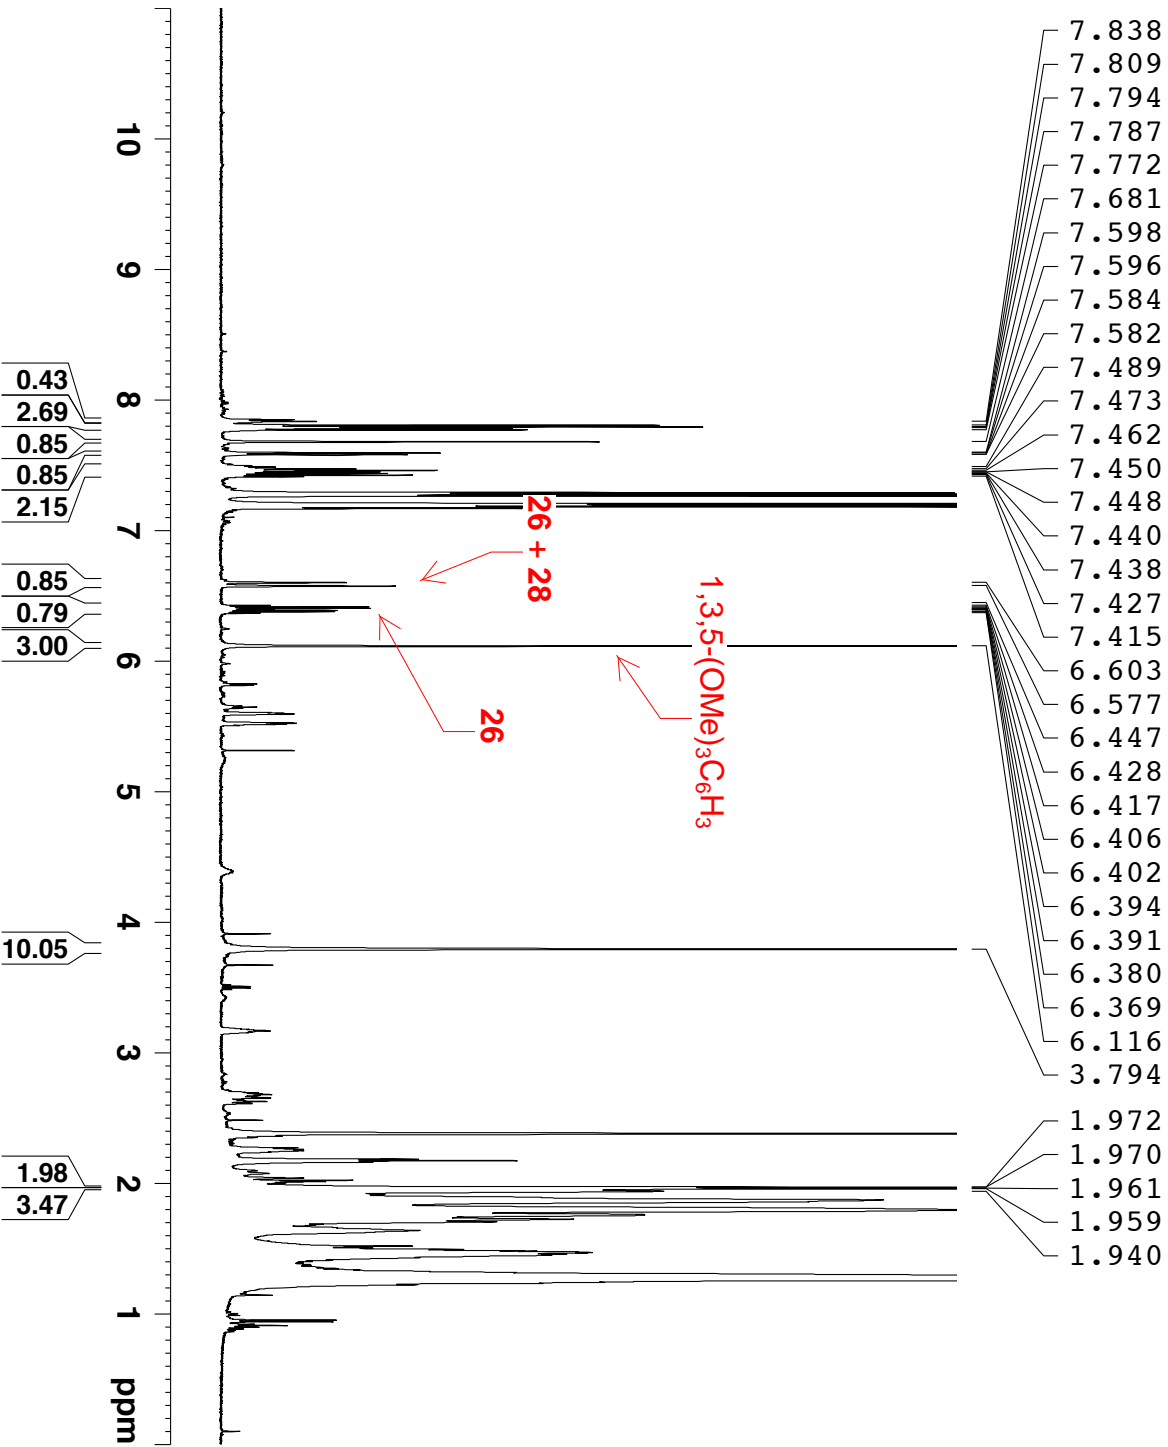

Current Data Parameters  
 NAME QZ-3-136-1  
 EXPNO 1  
 PROCNO 1

F2 - Acquisition Parameters  
 Date\_ 20121125  
 Time\_ 22.43  
 INSTRUM spect  
 PROBHD 5 mm PABBO BB-  
 PULPROG zg30  
 TD 65536  
 SOLVENT CDCl3  
 NS 8  
 DS 2  
 SWH 8403.361 Hz  
 FIDRES 0.128225 Hz  
 AQ 3.8994420 sec  
 RG 144  
 DW 59.500 usec  
 DE 9.10 usec  
 TE 298.1 K  
 D1 1.00000000 sec  
 TD0 1

==== CHANNEL f1 =====  
 SF01 600.3233018 MHz  
 NUC1 1H  
 P1 14.80 usec

F2 - Processing parameters  
 SI 65536  
 SF 600.3200037 MHz  
 WDW EM  
 SSB 0  
 LB 0.30 Hz  
 GB 0  
 PC 1.00

QZ-3-136-1 1 1 / qme/xdata/qzhou qzhou  
Scale : 3.07

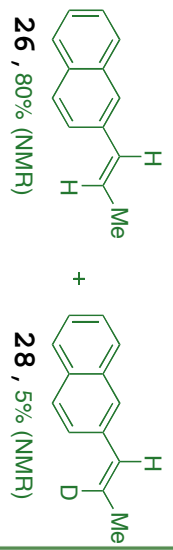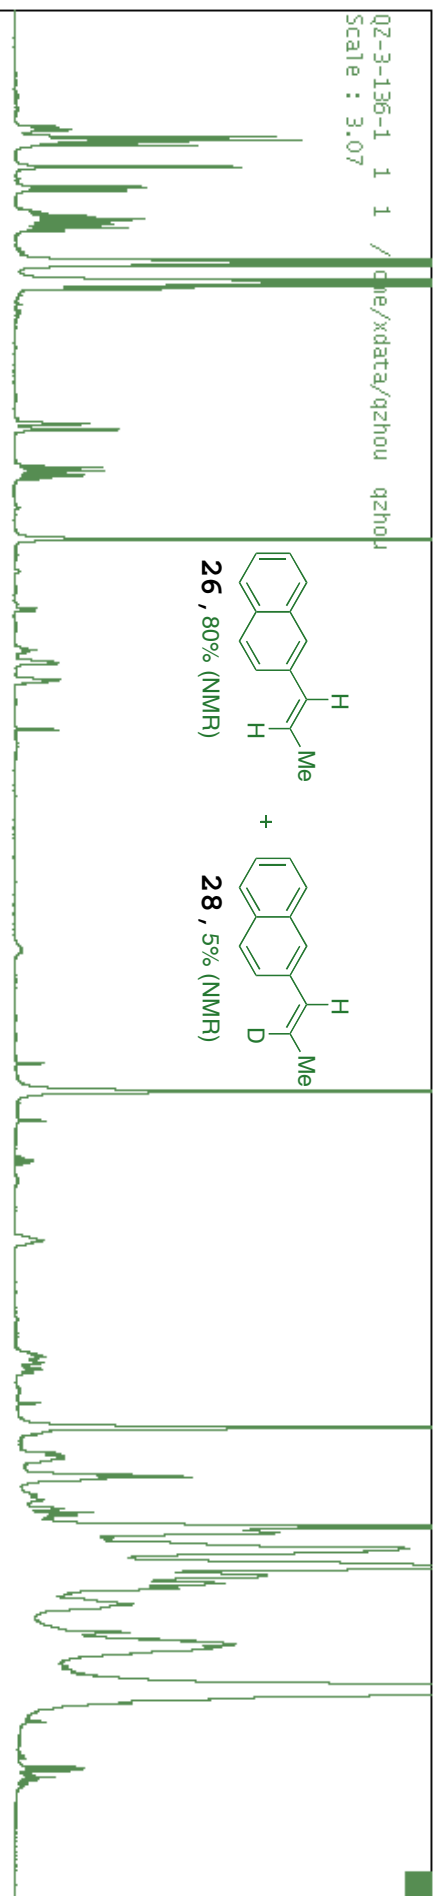

QZ-3-109-E-trans 1 1 /home/xdata/qzhou qzhou

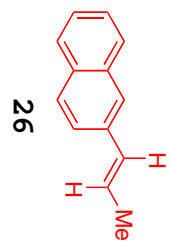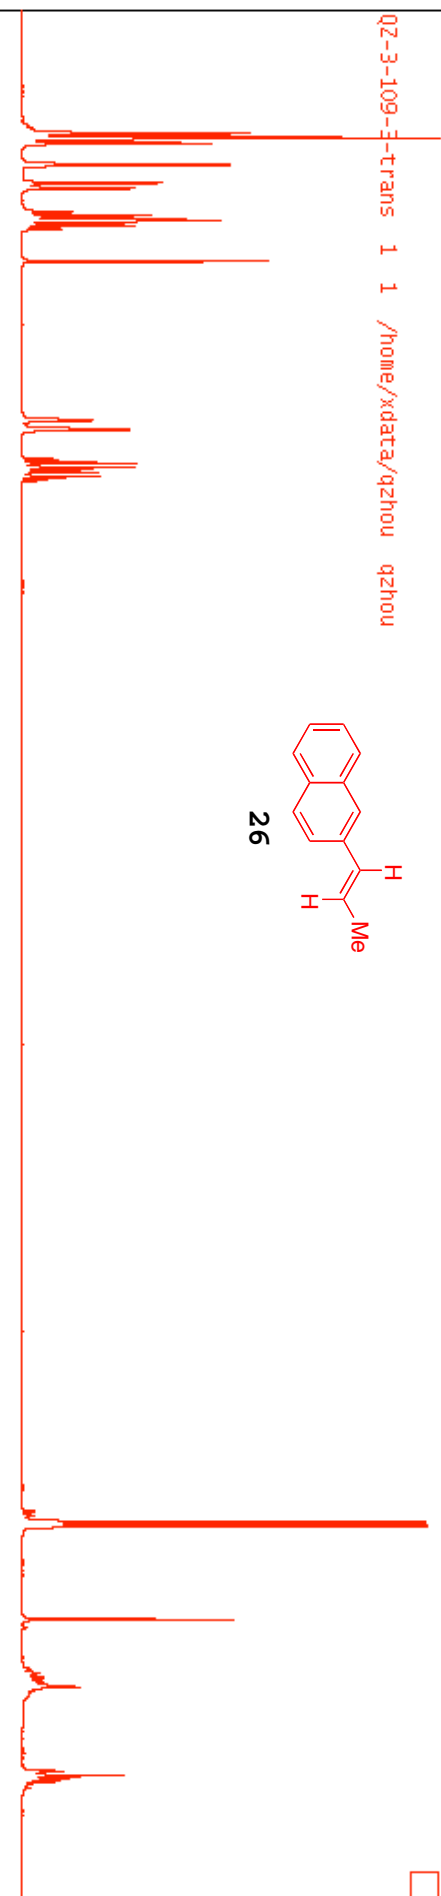

QZ-3-122-1-cis 1 1 /home/xdata/qzhou qzhou

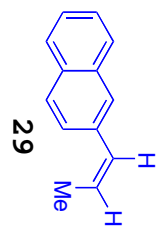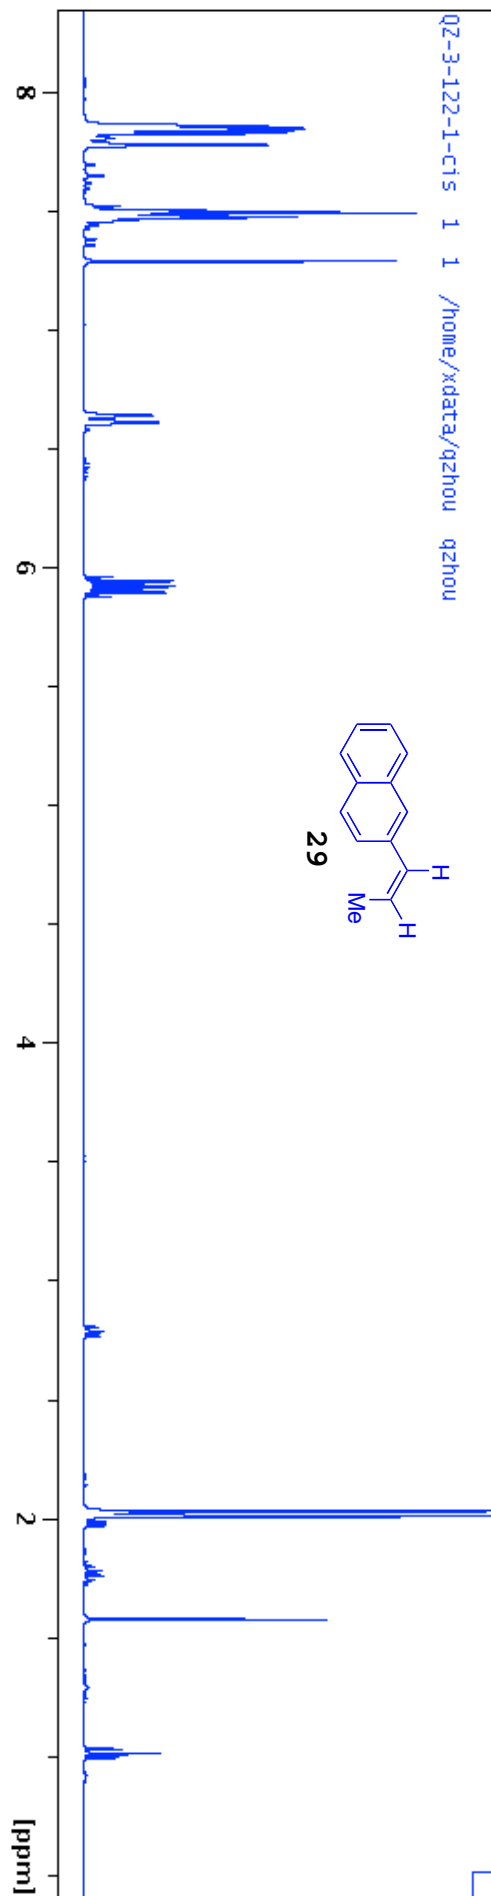



compound S-7 1HNMR

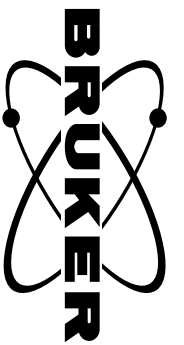

Current Data Parameters  
 NAME HH-4-136  
 EXPNO 1  
 PROCNO 1

F2 - Acquisition Parameters

Date\_ 20130120  
 Time 10.12  
 INSTRUM spect  
 PROBHD 5 mm PABBO BB/  
 PULPROG zg30  
 TD 65536  
 SOLVENT CDCl3  
 NS 8  
 DS 2  
 SWH 8403.361 Hz  
 FIDRES 0.128225 Hz  
 AQ 3.8994420 sec  
 RG 128  
 DW 59.500 usec  
 DE 17.39 usec  
 TE 300.0 K  
 D1 1.0000000 sec  
 TD0 1

==== CHANNEL f1 ====  
 SFO1 600.3233018 MHz  
 NUC1 1H  
 P1 10.77 usec

F2 - Processing parameters

SI 65536  
 SF 600.3200164 MHz  
 WDW EM  
 SSB 0  
 LB 0.30 Hz  
 GB 0  
 PC 1.00

- 0.620
- 0.476
- 0.135
- 0.133
- 0.121
- 0.118
- 0.088
- 0.086
- 0.074
- 0.071
- 0.016
- 0.012
- 0.002
- 7.998

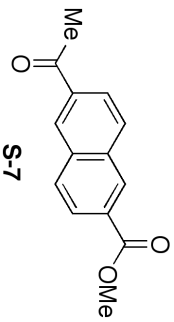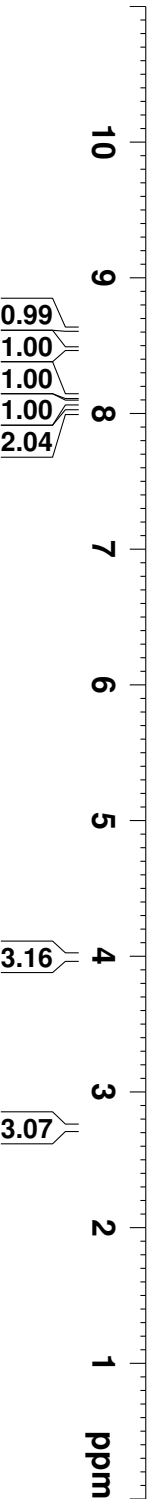

compound S-7 13CNMR

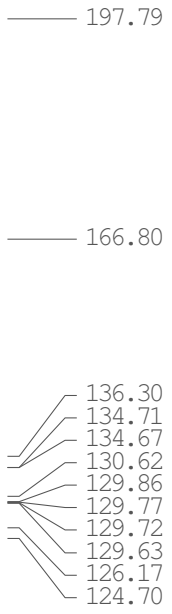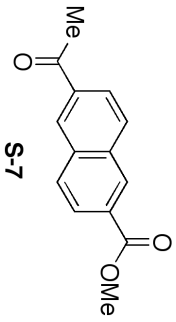

Current Data Parameters  
 NAME HH-4-136  
 EXPNO 2  
 PROCNO 1

F2 - Acquisition Parameters  
 Date\_ 20130120  
 Time 10.49  
 INSTRUM spect  
 PROBHID 5 mm PABBO BB/  
 PULPROG zgpg30  
 TD 65536  
 SOLVENT CDCl3  
 NS 256  
 DS 4  
 SWH 34722.223 Hz  
 FIDRES 0.529819 Hz  
 AQ 0.9437684 sec  
 RG 2050  
 DW 14.400 usec  
 DE 19.34 usec  
 TE 300.0 K  
 D1 1.1000002 sec  
 D11 0.03000000 sec  
 TD0 1

CHANNEL f1  
 SF01 150.9656784 MHz  
 NUC1 13C  
 P1 10.63 usec

F2 - Processing parameters  
 SI 32768  
 SF 150.9505840 MHz  
 WDW EM  
 SSB 0  
 LB 1.00 Hz  
 GB 0  
 PC 1.40

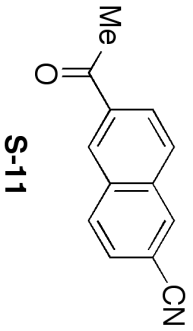

8.489  
 8.268  
 8.153  
 8.151  
 8.139  
 8.136  
 8.071  
 8.056  
 7.981  
 7.967  
 7.700  
 7.697  
 7.686  
 7.683

2.748

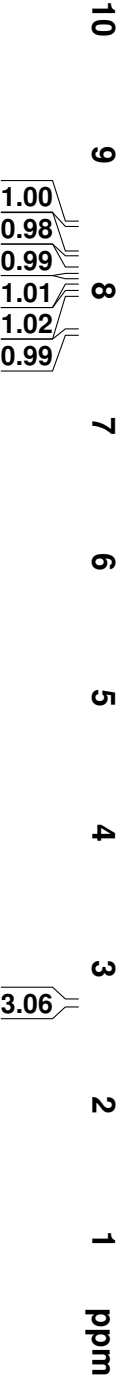

Current Data Parameters  
 NAME QZ-3-207-1  
 EXPNO 1  
 PROCNO 1

F2 - Acquisition Parameters  
 Date\_ 20130120  
 Time 1.03  
 INSTRUM spect  
 PROBHD 5 mm PABBO BB/  
 PULPROG zg30  
 TD 65536  
 SOLVENT CDCl3  
 NS 8  
 DS 2  
 SWH 8403.361 Hz  
 FIDRES 0.128225 Hz  
 AQ 3.8994420 sec  
 RG 161  
 DW 59.500 usec  
 DE 17.39 usec  
 TE 300.0 K  
 D1 1.0000000 sec  
 TD0 1

CHANNEL, f1  
 SFO1 600.3233018 MHz  
 NUC1 1H  
 P1 10.77 usec

F2 - Processing parameters  
 SI 65536  
 SF 600.3200165 MHz  
 WDW EM  
 SSB 0  
 LB 0.30 Hz  
 GB 0  
 PC 1.00

compound S-11 13CNMR



Current Data Parameters  
 NAME QZ-3-207-1  
 EXPNO 2  
 PROCNO 1

F2 - Acquisition Parameters

Date\_ 20130120  
 Time 1.22  
 INSTRUM spect  
 PROBHID 5 mm PABBO BB/  
 PULPROG zgpg30  
 TD 65536  
 SOLVENT CDCl3  
 NS 512  
 DS 4  
 SWH 34722.223 Hz  
 FIDRES 0.529819 Hz  
 AQ 0.9437684 sec  
 RG 2050  
 DW 14.400 usec  
 DE 19.34 usec  
 TE 300.0 K  
 D1 1.1000002 sec  
 D11 0.03000000 sec  
 TD0 1

==== CHANNEL f1 =====  
 SF01 150.9656784 MHz  
 NUC1 13C  
 P1 10.63 usec

F2 - Processing parameters  
 SI 32768  
 SF 150.9505840 MHz  
 WDW EM  
 SSB 0  
 LB 1.00 Hz  
 GB 0  
 PC 1.40

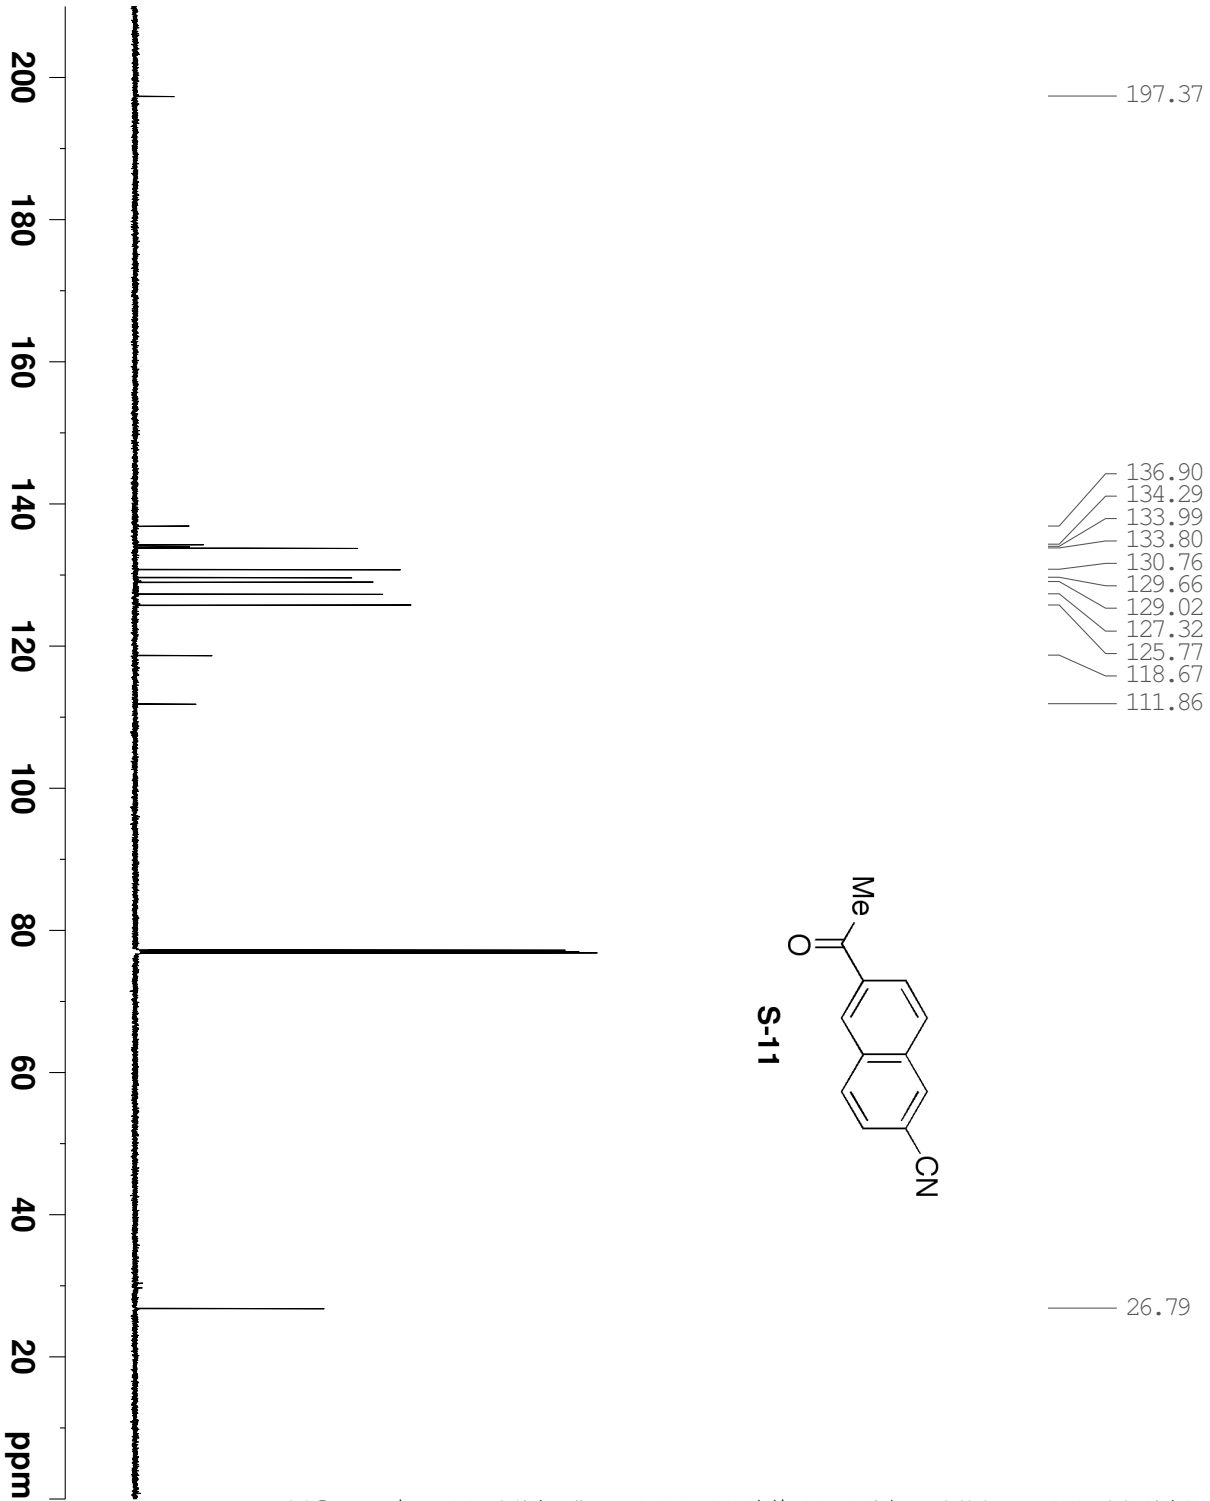

## Compound 2, racemic

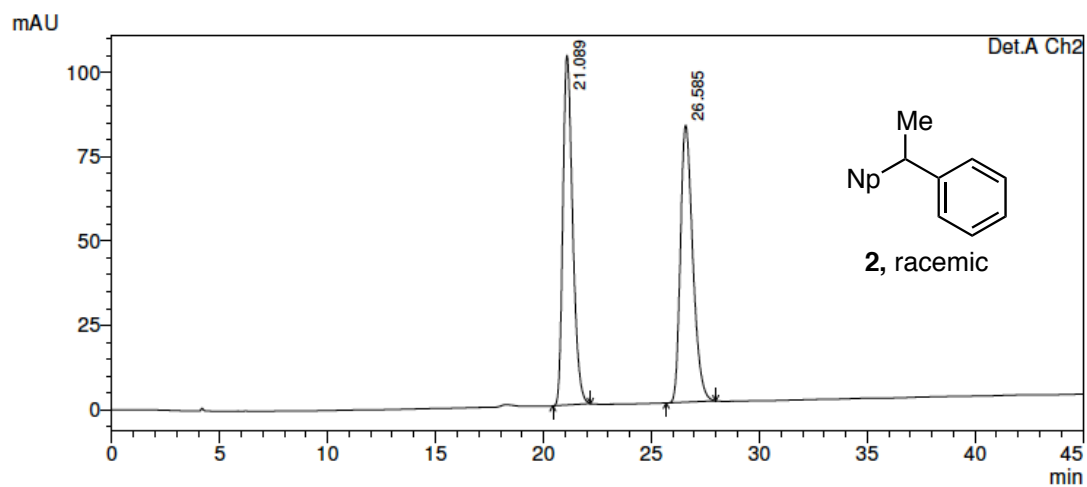

Detector A Ch2 220nm

| Peak# | Ret. Time | Area    | Height | Area %  | Height % |
|-------|-----------|---------|--------|---------|----------|
| 1     | 21.089    | 3262561 | 103718 | 49.915  | 55.809   |
| 2     | 26.585    | 3273635 | 82125  | 50.085  | 44.191   |
| Total |           | 6536196 | 185843 | 100.000 | 100.000  |

## Compound 2, 98% ee

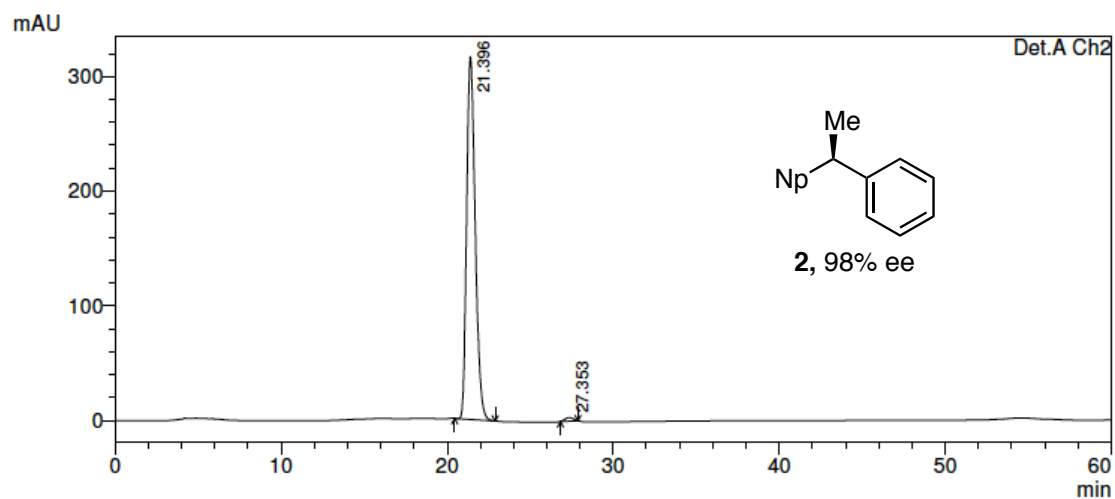

Detector A Ch2 220nm

| Peak# | Ret. Time | Area     | Height | Area %  | Height % |
|-------|-----------|----------|--------|---------|----------|
| 1     | 21.396    | 11355848 | 316283 | 99.047  | 99.024   |
| 2     | 27.353    | 109219   | 3118   | 0.953   | 0.976    |
| Total |           | 11465067 | 319400 | 100.000 | 100.000  |

### Compound 3, racemic

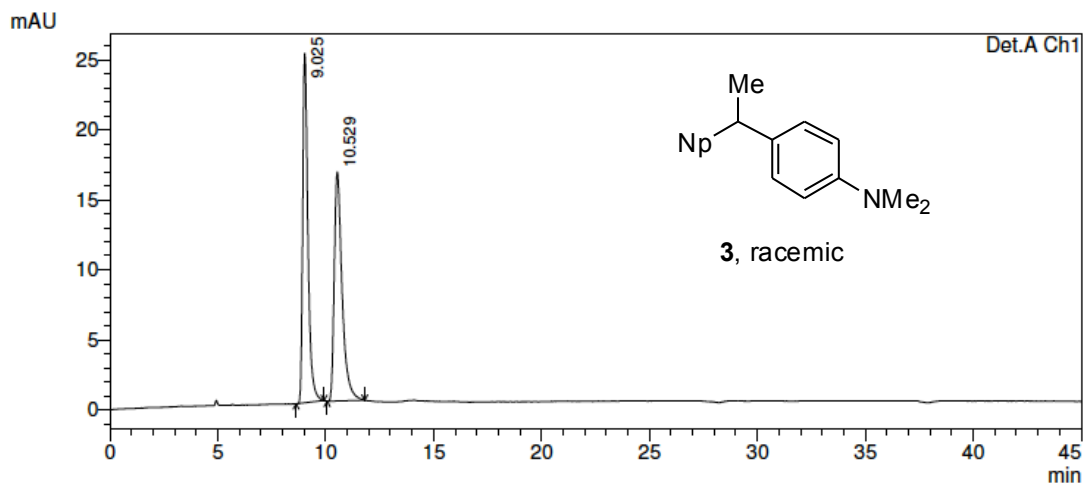

Detector A Ch1 254nm

| Peak# | Ret. Time | Area   | Height | Area %  | Height % |
|-------|-----------|--------|--------|---------|----------|
| 1     | 9.025     | 420349 | 24972  | 50.369  | 60.385   |
| 2     | 10.529    | 414192 | 16383  | 49.631  | 39.615   |
| Total |           | 834541 | 41355  | 100.000 | 100.000  |

### Compound 3, 86% ee

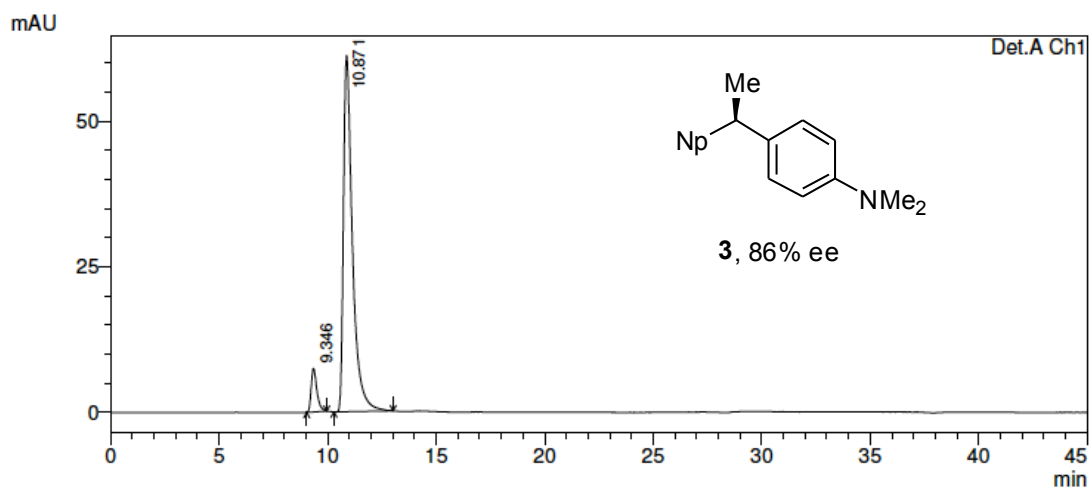

Detector A Ch1 254nm

| Peak# | Ret. Time | Area    | Height | Area %  | Height % |
|-------|-----------|---------|--------|---------|----------|
| 1     | 9.346     | 136637  | 7475   | 7.169   | 10.895   |
| 2     | 10.871    | 1769349 | 61137  | 92.831  | 89.105   |
| Total |           | 1905986 | 68612  | 100.000 | 100.000  |

### Compound 4, racemic

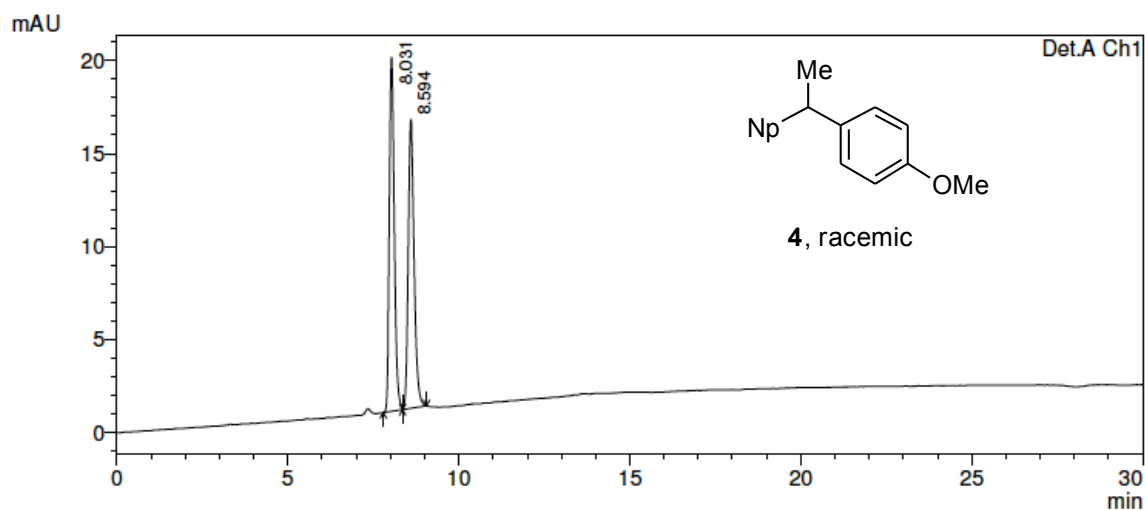

Detector A Ch1 254nm

| Peak# | Ret. Time | Area   | Height | Area %  | Height % |
|-------|-----------|--------|--------|---------|----------|
| 1     | 8.031     | 191673 | 19028  | 50.578  | 55.069   |
| 2     | 8.594     | 187296 | 15524  | 49.422  | 44.931   |
| Total |           | 378969 | 34552  | 100.000 | 100.000  |

### Compound 4, 96% ee

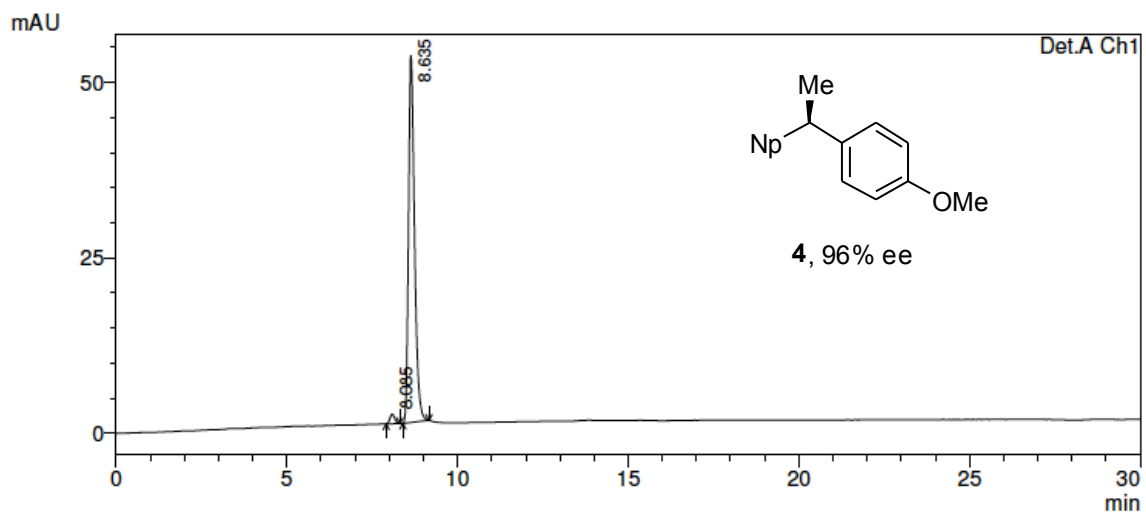

Detector A Ch1 254nm

| Peak# | Ret. Time | Area   | Height | Area %  | Height % |
|-------|-----------|--------|--------|---------|----------|
| 1     | 8.085     | 13175  | 1356   | 1.992   | 2.529    |
| 2     | 8.635     | 648308 | 52277  | 98.008  | 97.471   |
| Total |           | 661483 | 53633  | 100.000 | 100.000  |

### Compound 5, racemic

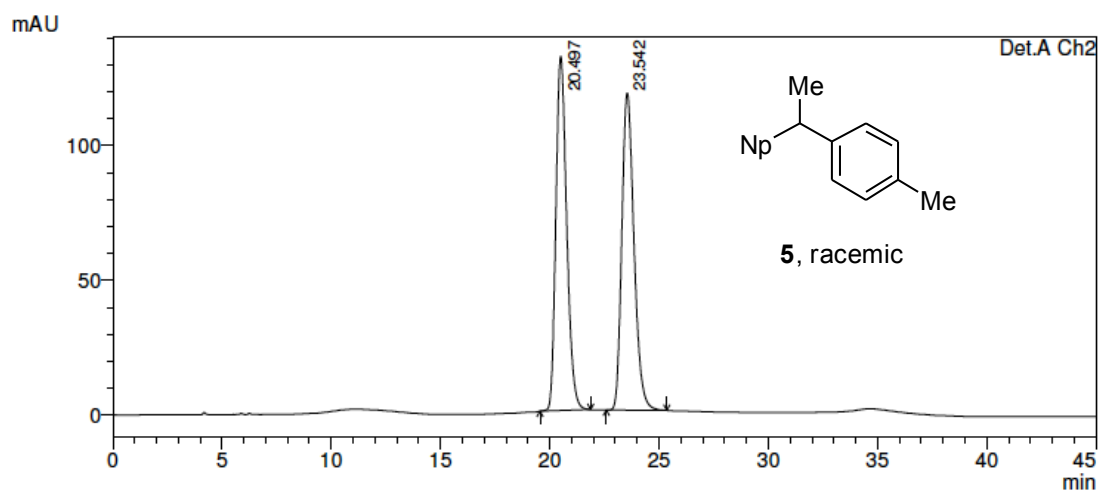

Detector A Ch2 220nm

| Peak# | Ret. Time | Area    | Height | Area %  | Height % |
|-------|-----------|---------|--------|---------|----------|
| 1     | 20.497    | 4523871 | 131568 | 49.803  | 52.771   |
| 2     | 23.542    | 4559688 | 117752 | 50.197  | 47.229   |
| Total |           | 9083559 | 249320 | 100.000 | 100.000  |

### Compound 5, 97% ee

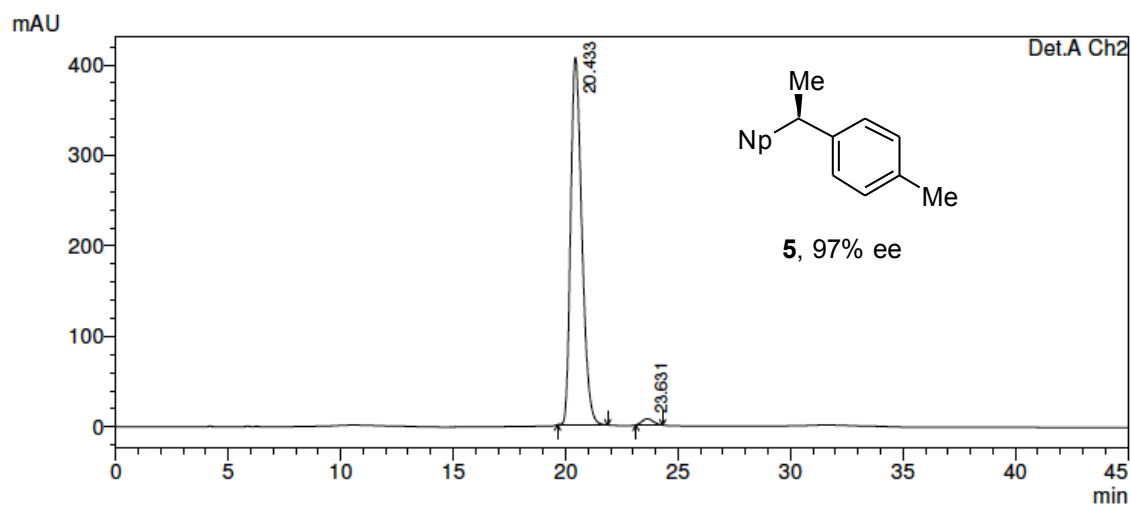

Detector A Ch2 220nm

| Peak# | Ret. Time | Area     | Height | Area %  | Height % |
|-------|-----------|----------|--------|---------|----------|
| 1     | 20.433    | 14024628 | 406137 | 98.341  | 98.352   |
| 2     | 23.631    | 236613   | 6803   | 1.659   | 1.648    |
| Total |           | 14261242 | 412940 | 100.000 | 100.000  |



### Compound 6, racemic

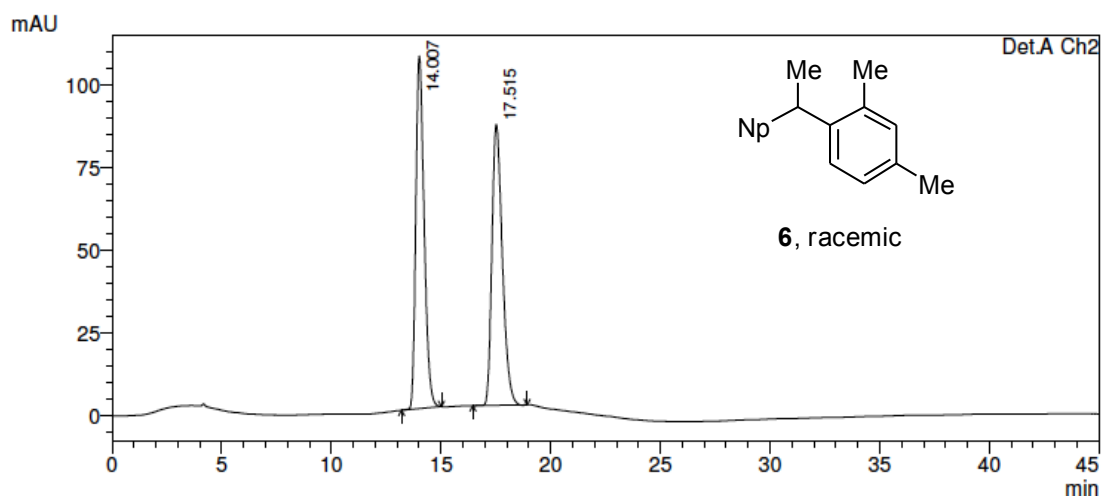

Detector A Ch2 220nm

| Peak# | Ret. Time | Area    | Height | Area %  | Height % |
|-------|-----------|---------|--------|---------|----------|
| 1     | 14.007    | 2808009 | 106586 | 50.097  | 55.666   |
| 2     | 17.515    | 2797140 | 84887  | 49.903  | 44.334   |
| Total |           | 5605149 | 191474 | 100.000 | 100.000  |

### Compound 6, 96% ee

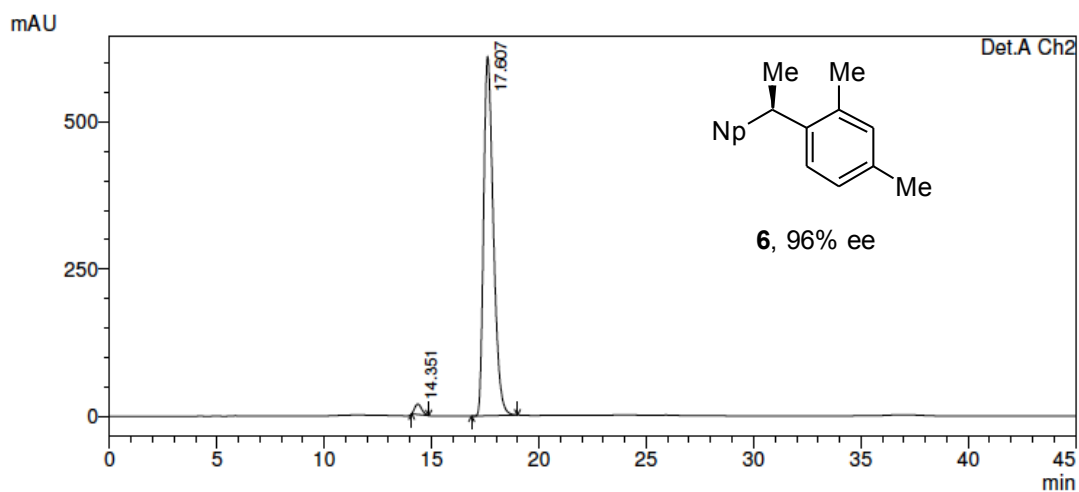

Detector A Ch2 220nm

| Peak# | Ret. Time | Area     | Height | Area %  | Height % |
|-------|-----------|----------|--------|---------|----------|
| 1     | 14.351    | 393869   | 17724  | 2.008   | 2.823    |
| 2     | 17.607    | 19217322 | 610132 | 97.992  | 97.177   |
| Total |           | 19611191 | 627856 | 100.000 | 100.000  |

### Compound 7, racemic

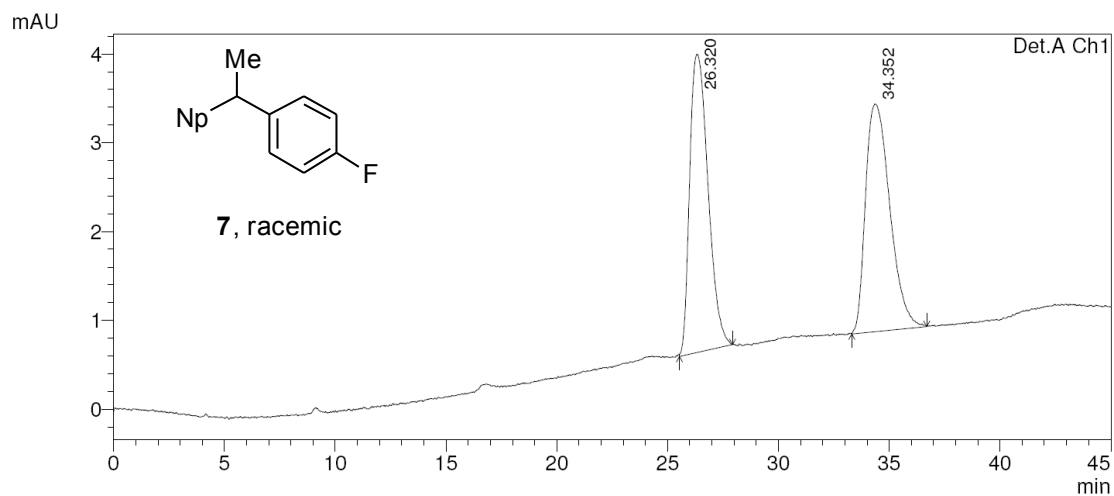

Detector A Ch1 254nm

| Peak# | Ret. Time | Area   | Height | Area %  | Height % |
|-------|-----------|--------|--------|---------|----------|
| 1     | 26.320    | 193738 | 3360   | 49.747  | 56.717   |
| 2     | 34.352    | 195710 | 2564   | 50.253  | 43.283   |
| Total |           | 389449 | 5925   | 100.000 | 100.000  |

### Compound 7, 96% ee

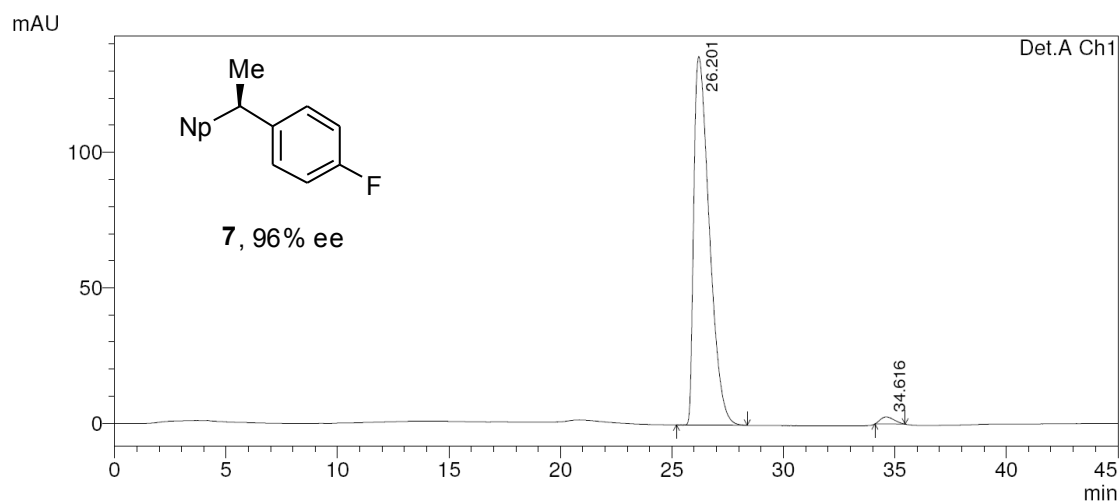

Detector A Ch1 254nm

| Peak# | Ret. Time | Area    | Height | Area %  | Height % |
|-------|-----------|---------|--------|---------|----------|
| 1     | 26.201    | 6602080 | 135918 | 98.328  | 98.110   |
| 2     | 34.616    | 112284  | 2618   | 1.672   | 1.890    |
| Total |           | 6714364 | 138536 | 100.000 | 100.000  |

### Compound 8, racemic

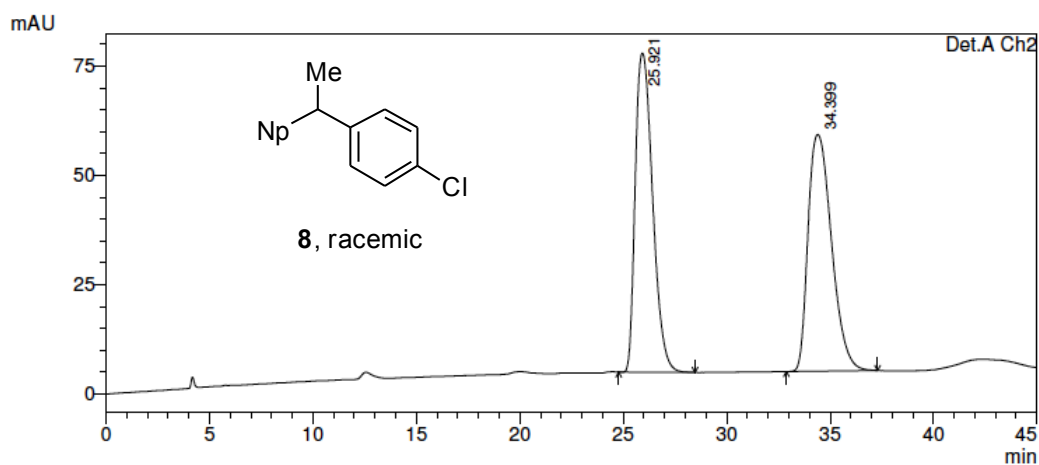

Detector A Ch2 220nm

| Peak# | Ret. Time | Area    | Height | Area %  | Height % |
|-------|-----------|---------|--------|---------|----------|
| 1     | 25.921    | 4270293 | 73019  | 49.968  | 57.422   |
| 2     | 34.399    | 4275844 | 54144  | 50.032  | 42.578   |
| Total |           | 8546138 | 127164 | 100.000 | 100.000  |

### Compound 8, 94% ee

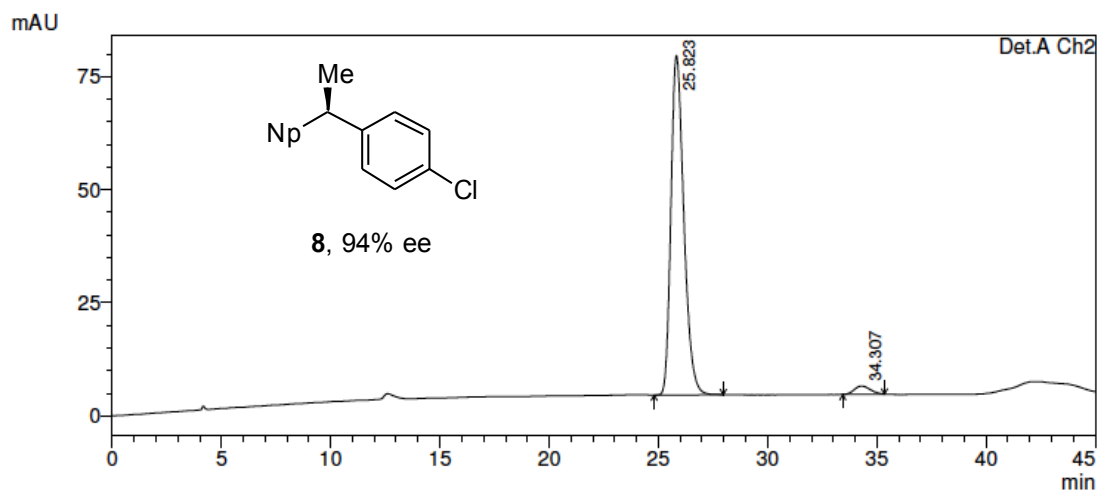

Detector A Ch2 220nm

| Peak# | Ret. Time | Area    | Height | Area %  | Height % |
|-------|-----------|---------|--------|---------|----------|
| 1     | 25.823    | 3087241 | 75048  | 97.037  | 97.589   |
| 2     | 34.307    | 94277   | 1854   | 2.963   | 2.411    |
| Total |           | 3181518 | 76902  | 100.000 | 100.000  |

### Compound 9, racemic

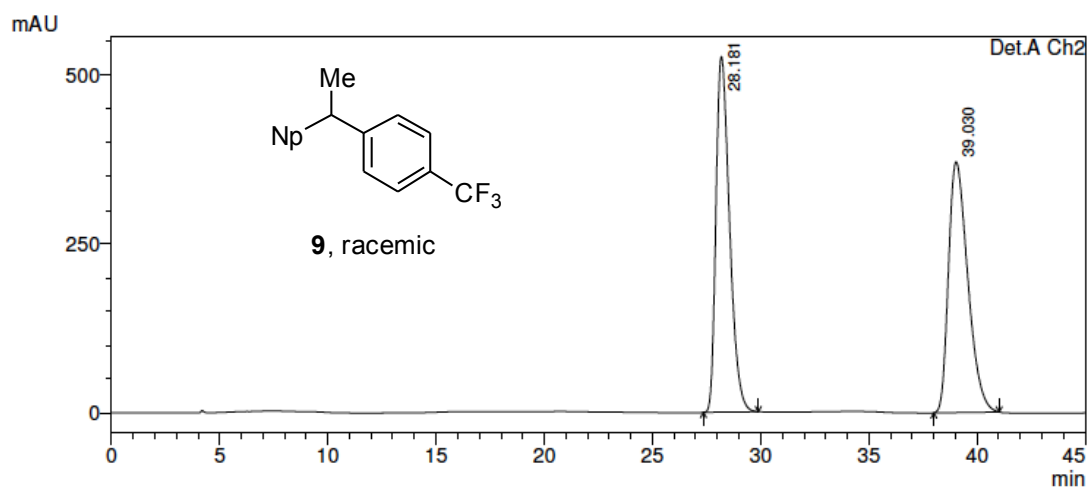

Detector A Ch2 220nm

| Peak# | Ret. Time | Area     | Height | Area %  | Height % |
|-------|-----------|----------|--------|---------|----------|
| 1     | 28.181    | 23034505 | 527033 | 50.014  | 58.657   |
| 2     | 39.030    | 23021610 | 371471 | 49.986  | 41.343   |
| Total |           | 46056115 | 898503 | 100.000 | 100.000  |

### Compound 9, 97% ee

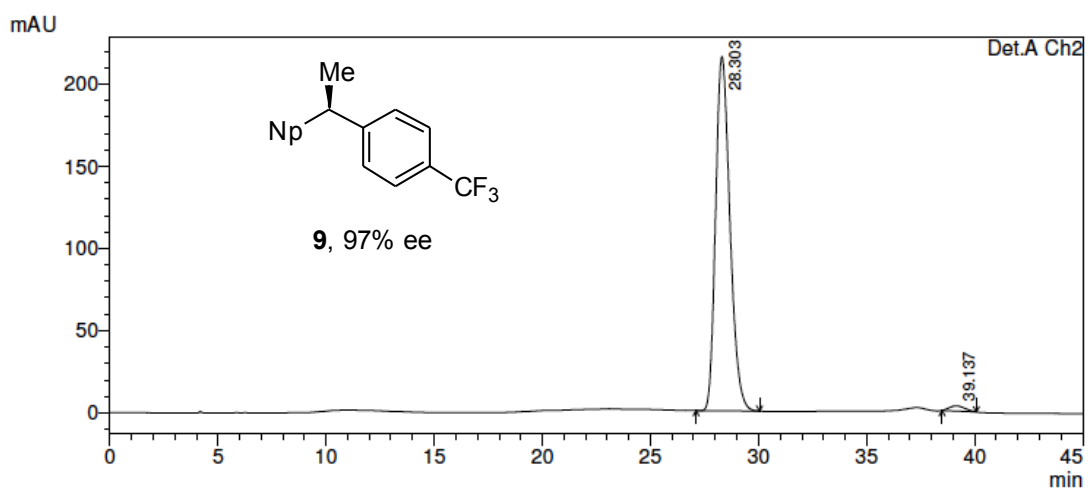

Detector A Ch2 220nm

| Peak# | Ret. Time | Area     | Height | Area %  | Height % |
|-------|-----------|----------|--------|---------|----------|
| 1     | 28.303    | 9967337  | 215692 | 98.419  | 98.556   |
| 2     | 39.137    | 160085   | 3159   | 1.581   | 1.444    |
| Total |           | 10127422 | 218851 | 100.000 | 100.000  |

### Compound 10, racemic

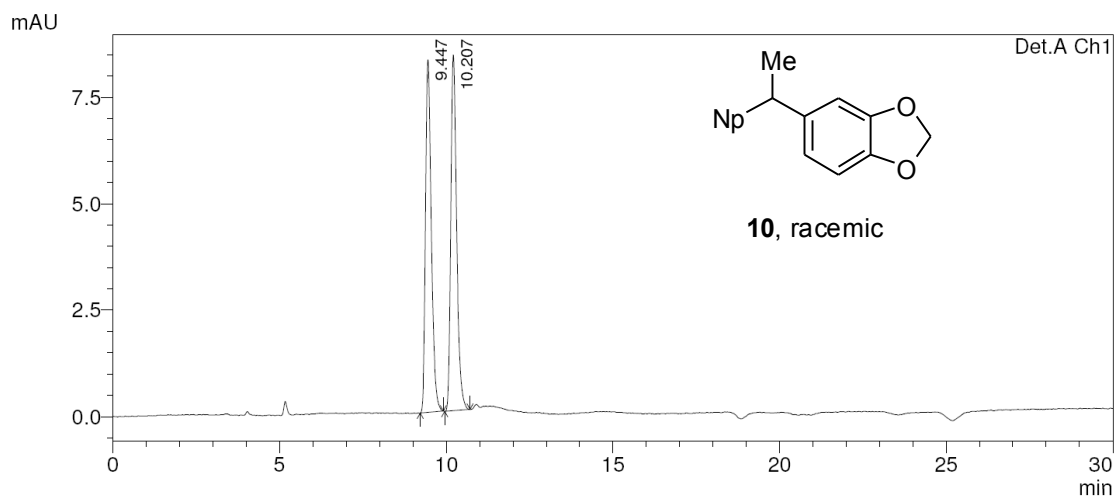

Detector A Ch1 254nm

| Peak# | Ret. Time | Area   | Height | Area %  | Height % |
|-------|-----------|--------|--------|---------|----------|
| 1     | 9.447     | 99369  | 8286   | 49.582  | 49.778   |
| 2     | 10.207    | 101046 | 8360   | 50.418  | 50.222   |
| Total |           | 200415 | 16646  | 100.000 | 100.000  |

### Compound 10, 96% ee

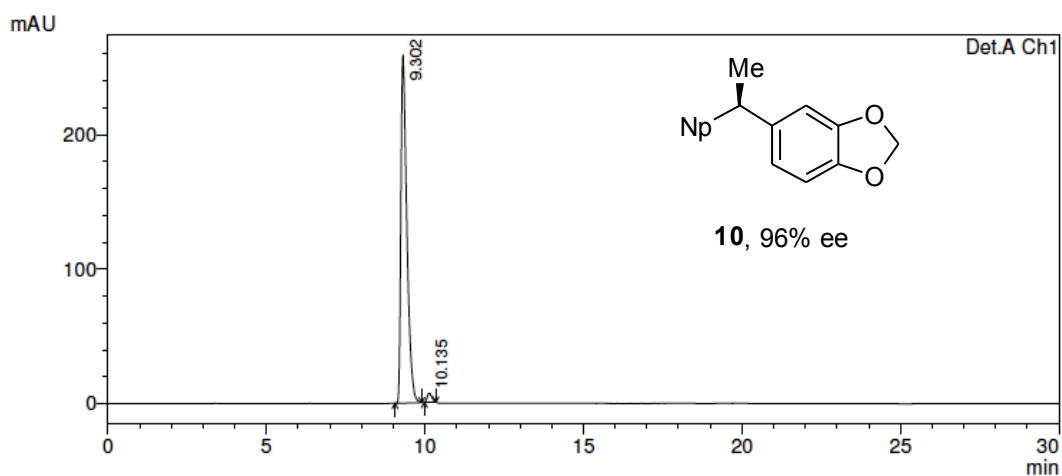

Detector A Ch1 254nm

| Peak# | Ret. Time | Area    | Height | Area %  | Height % |
|-------|-----------|---------|--------|---------|----------|
| 1     | 9.302     | 3412628 | 258849 | 98.030  | 97.482   |
| 2     | 10.135    | 68590   | 6685   | 1.970   | 2.518    |
| Total |           | 3481218 | 265533 | 100.000 | 100.000  |

### Compound 11, racemic

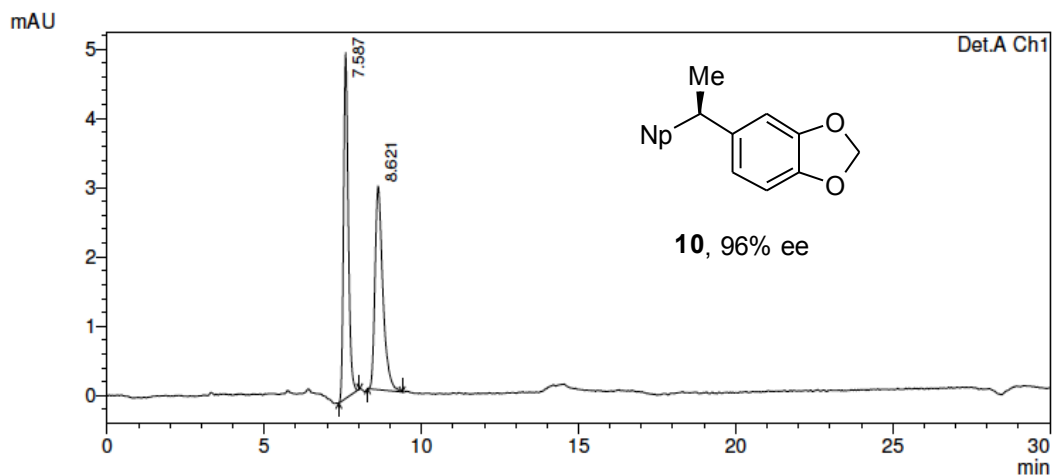

Detector A Ch1 254nm

| Peak# | Ret. Time | Area   | Height | Area %  | Height % |
|-------|-----------|--------|--------|---------|----------|
| 1     | 7.587     | 53165  | 4992   | 50.782  | 62.930   |
| 2     | 8.621     | 51528  | 2941   | 49.218  | 37.070   |
| Total |           | 104693 | 7933   | 100.000 | 100.000  |

### Compound 11, 98% ee

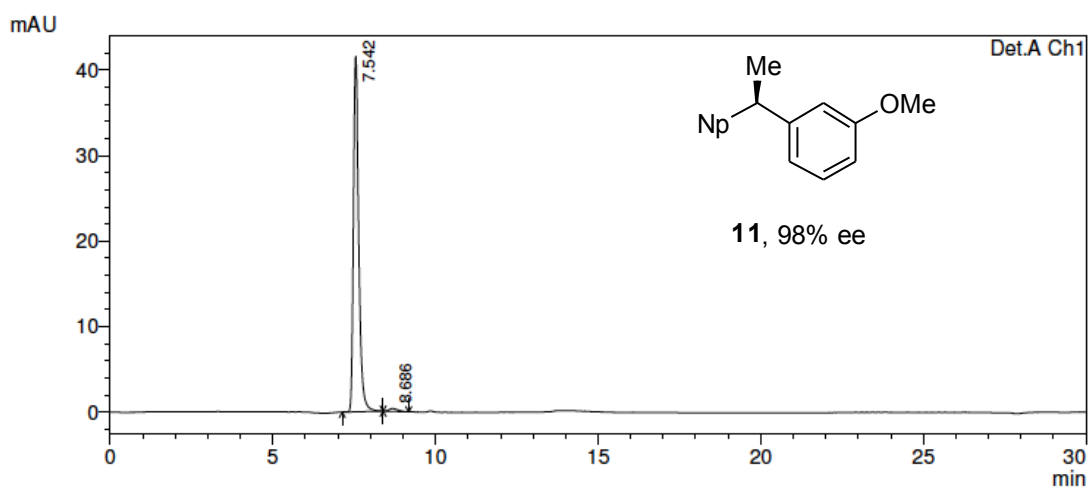

Detector A Ch1 254nm

| Peak# | Ret. Time | Area   | Height | Area %  | Height % |
|-------|-----------|--------|--------|---------|----------|
| 1     | 7.542     | 475460 | 41545  | 98.690  | 99.195   |
| 2     | 8.686     | 6310   | 337    | 1.310   | 0.805    |
| Total |           | 481770 | 41882  | 100.000 | 100.000  |

### Compound 12, racemic

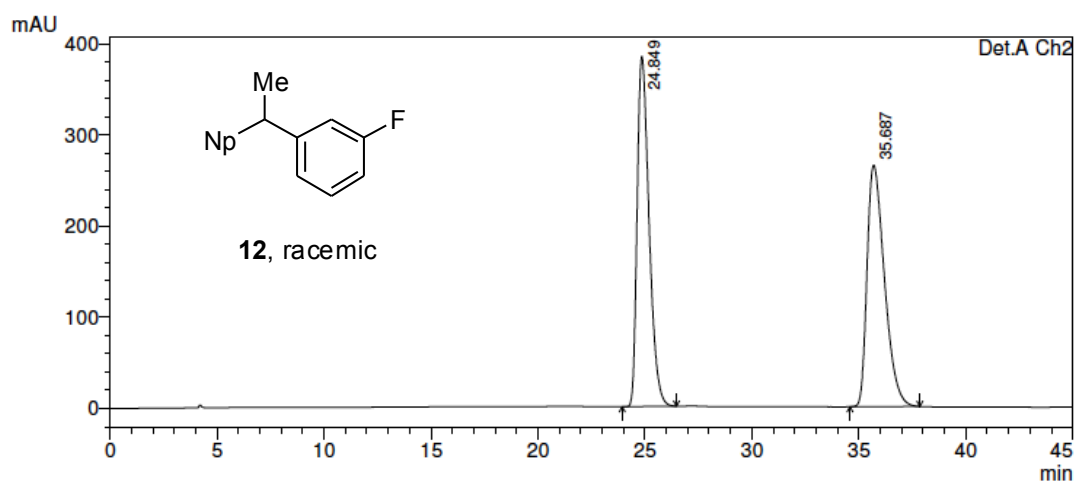

Detector A Ch2 220nm

| Peak# | Ret. Time | Area     | Height | Area %  | Height % |
|-------|-----------|----------|--------|---------|----------|
| 1     | 24.849    | 14888201 | 384482 | 49.841  | 59.188   |
| 2     | 35.687    | 14983179 | 265111 | 50.159  | 40.812   |
| Total |           | 29871380 | 649593 | 100.000 | 100.000  |

### Compound 12, 94% ee

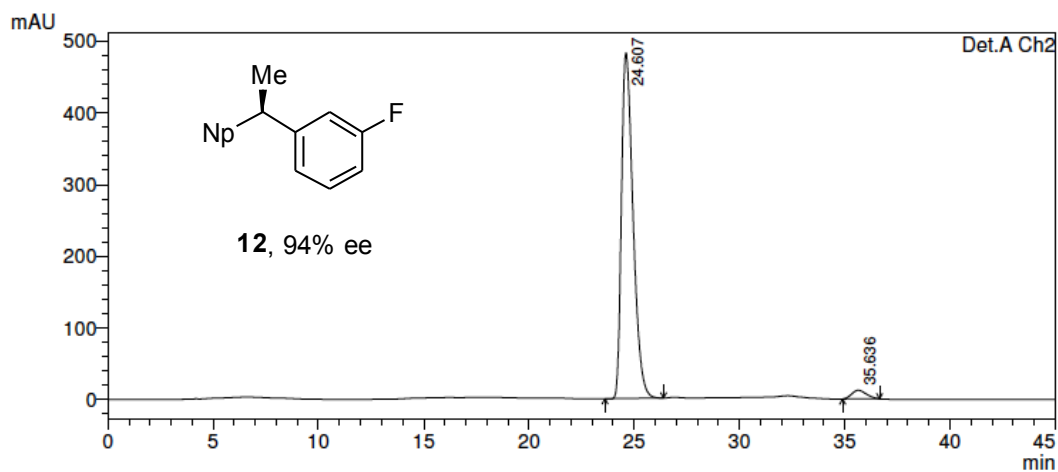

Detector A Ch2 220nm

| Peak# | Ret. Time | Area     | Height | Area %  | Height % |
|-------|-----------|----------|--------|---------|----------|
| 1     | 24.607    | 18437656 | 482435 | 96.983  | 97.593   |
| 2     | 35.636    | 573579   | 11899  | 3.017   | 2.407    |
| Total |           | 19011234 | 494333 | 100.000 | 100.000  |

### Compound 13, racemic

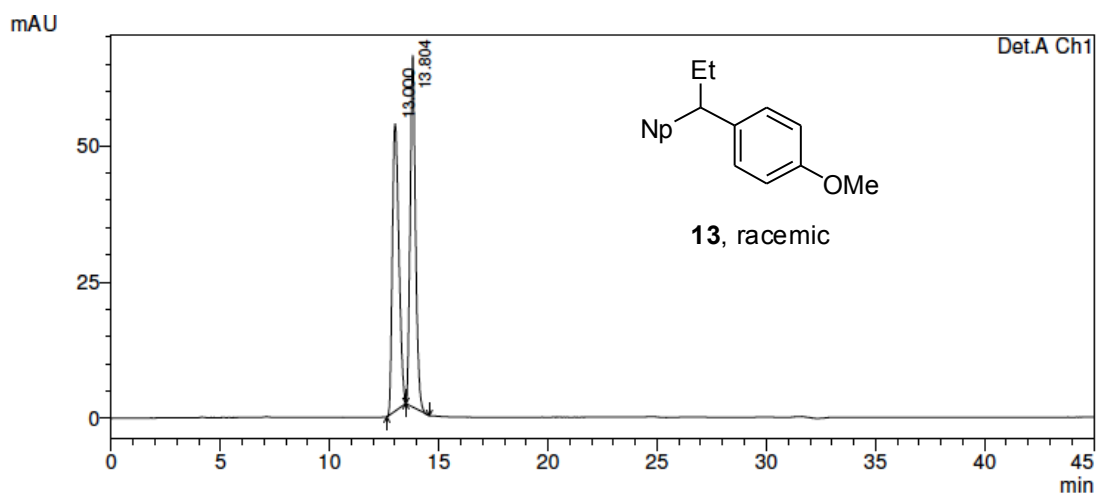

Detector A Ch1 254nm

| Peak# | Ret. Time | Area    | Height | Area %  | Height % |
|-------|-----------|---------|--------|---------|----------|
| 1     | 13.000    | 1095755 | 52759  | 49.972  | 44.969   |
| 2     | 13.804    | 1096990 | 64565  | 50.028  | 55.031   |
| Total |           | 2192745 | 117324 | 100.000 | 100.000  |

### Compound 13, 94% ee

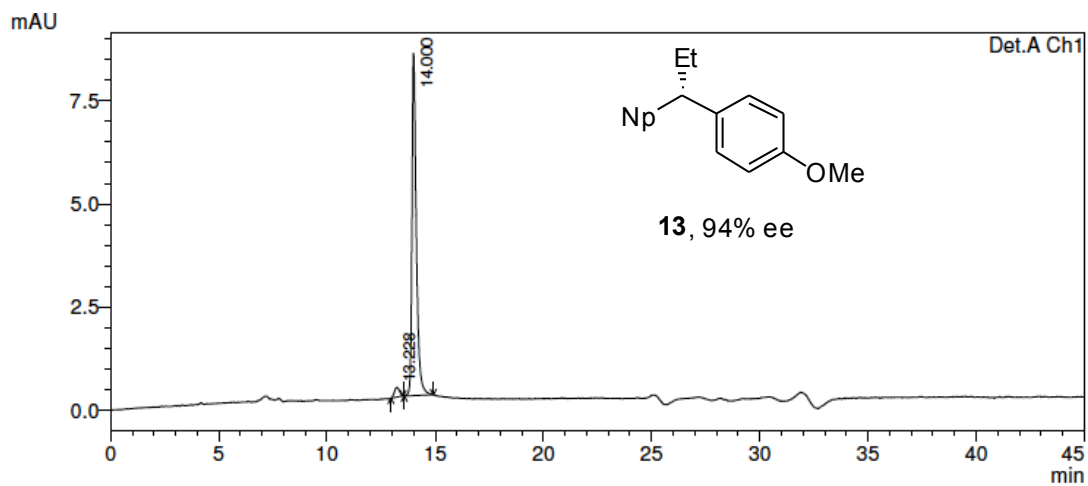

Detector A Ch1 254nm

| Peak# | Ret. Time | Area   | Height | Area %  | Height % |
|-------|-----------|--------|--------|---------|----------|
| 1     | 13.228    | 3845   | 237    | 3.216   | 2.779    |
| 2     | 14.000    | 115716 | 8281   | 96.784  | 97.221   |
| Total |           | 119561 | 8518   | 100.000 | 100.000  |



### Compound 14, racemic

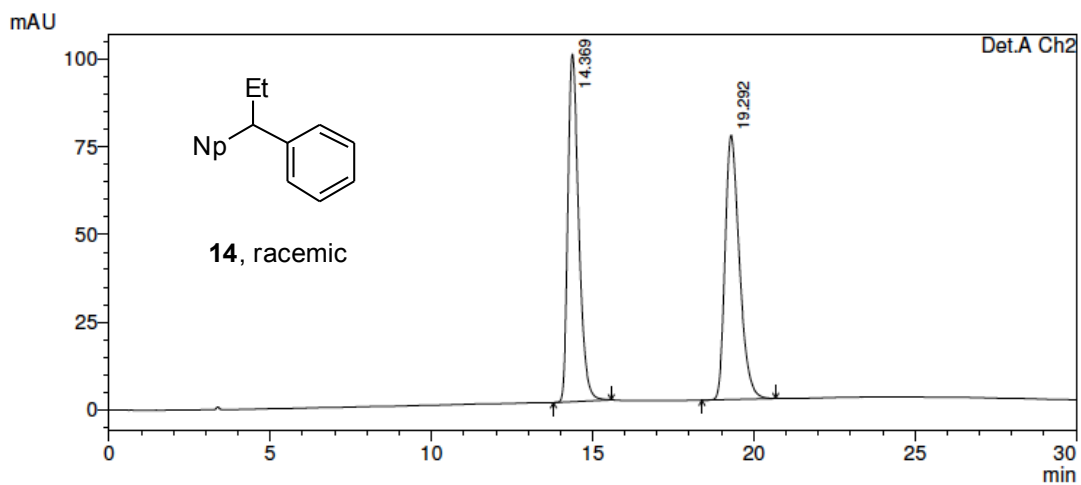

Detector A Ch2 220nm

| Peak# | Ret. Time | Area    | Height | Area %  | Height % |
|-------|-----------|---------|--------|---------|----------|
| 1     | 14.369    | 2317727 | 98945  | 49.927  | 56.791   |
| 2     | 19.292    | 2324539 | 75281  | 50.073  | 43.209   |
| Total |           | 4642266 | 174226 | 100.000 | 100.000  |

### Compound 14, 96% ee

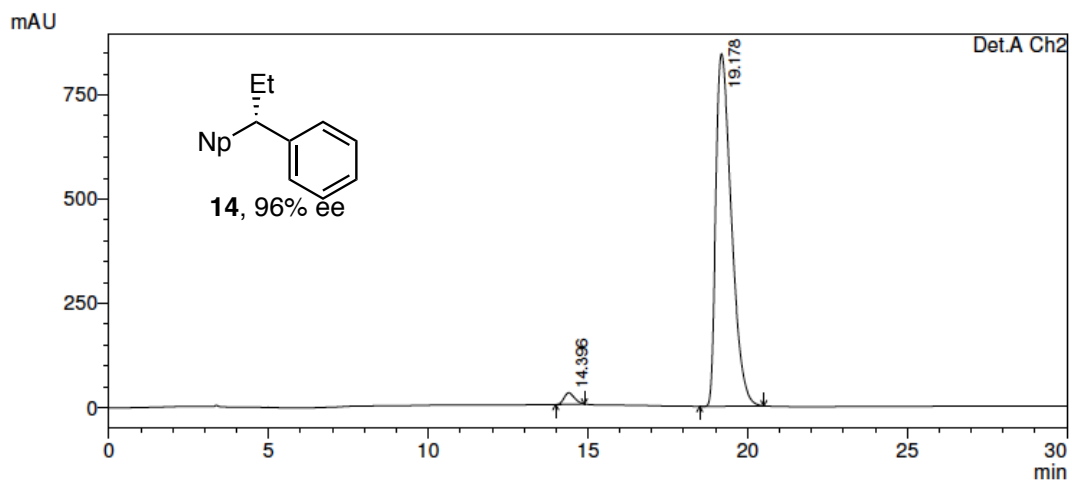

Detector A Ch2 220nm

| Peak# | Ret. Time | Area     | Height | Area %  | Height % |
|-------|-----------|----------|--------|---------|----------|
| 1     | 14.396    | 619653   | 27486  | 2.118   | 3.152    |
| 2     | 19.178    | 28642737 | 844555 | 97.882  | 96.848   |
| Total |           | 29262391 | 872041 | 100.000 | 100.000  |

**Compound 15, racemic**

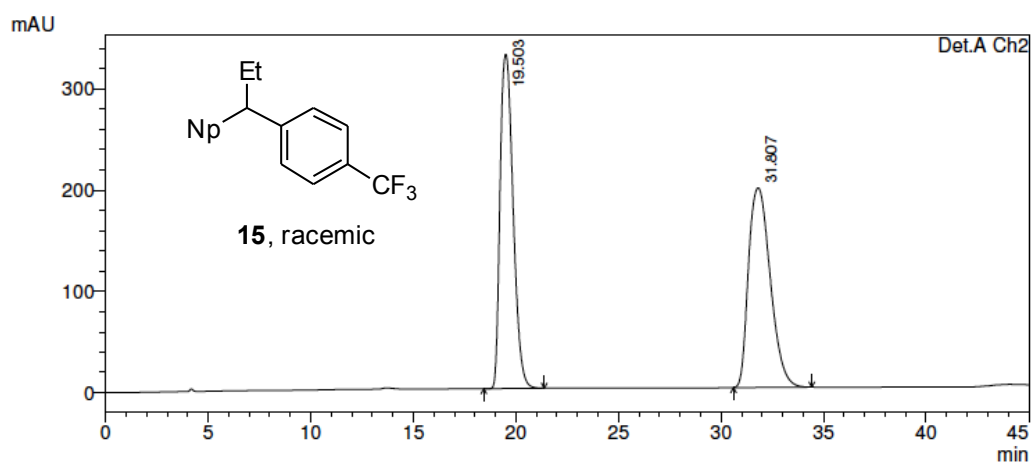

Detector A Ch2 220nm

| Peak# | Ret. Time | Area     | Height | Area %  | Height % |
|-------|-----------|----------|--------|---------|----------|
| 1     | 19.503    | 14527364 | 330016 | 49.946  | 62.606   |
| 2     | 31.807    | 14558791 | 197114 | 50.054  | 37.394   |
| Total |           | 29086155 | 527130 | 100.000 | 100.000  |

**Compound 15, 96% ee**

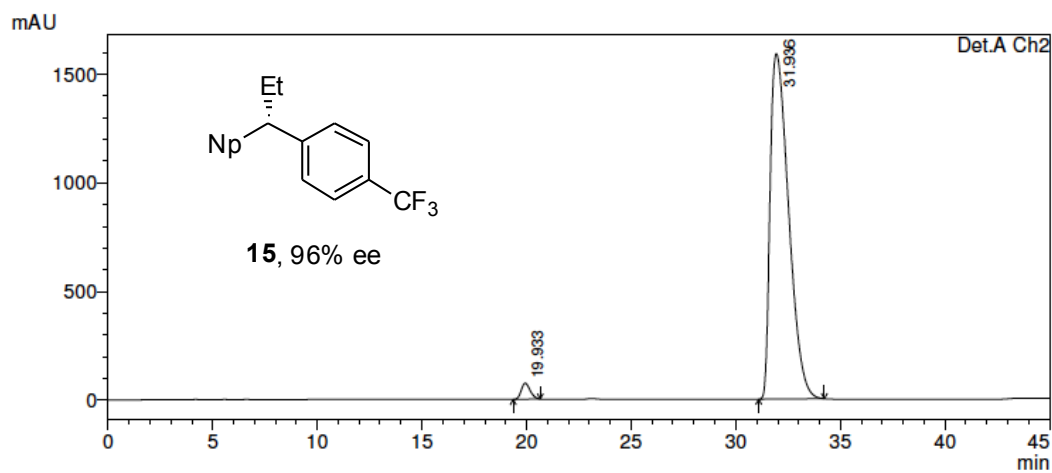

Detector A Ch2 220nm

| Peak# | Ret. Time | Area     | Height  | Area %  | Height % |
|-------|-----------|----------|---------|---------|----------|
| 1     | 19.933    | 2186019  | 73861   | 2.187   | 4.435    |
| 2     | 31.936    | 97776569 | 1591639 | 97.813  | 95.565   |
| Total |           | 99962589 | 1665500 | 100.000 | 100.000  |

### Compound 16, racemic

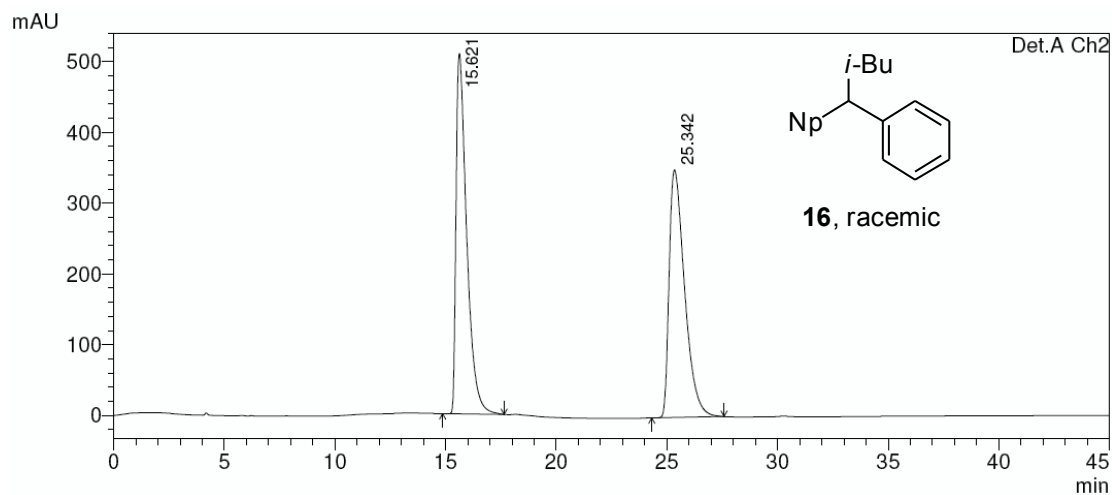

Detector A Ch2 220nm

| Peak# | Ret. Time | Area     | Height | Area %  | Height % |
|-------|-----------|----------|--------|---------|----------|
| 1     | 15.621    | 16984566 | 509077 | 50.009  | 59.278   |
| 2     | 25.342    | 16978126 | 349718 | 49.991  | 40.722   |
| Total |           | 33962693 | 858795 | 100.000 | 100.000  |

### Compound 16, 91% ee

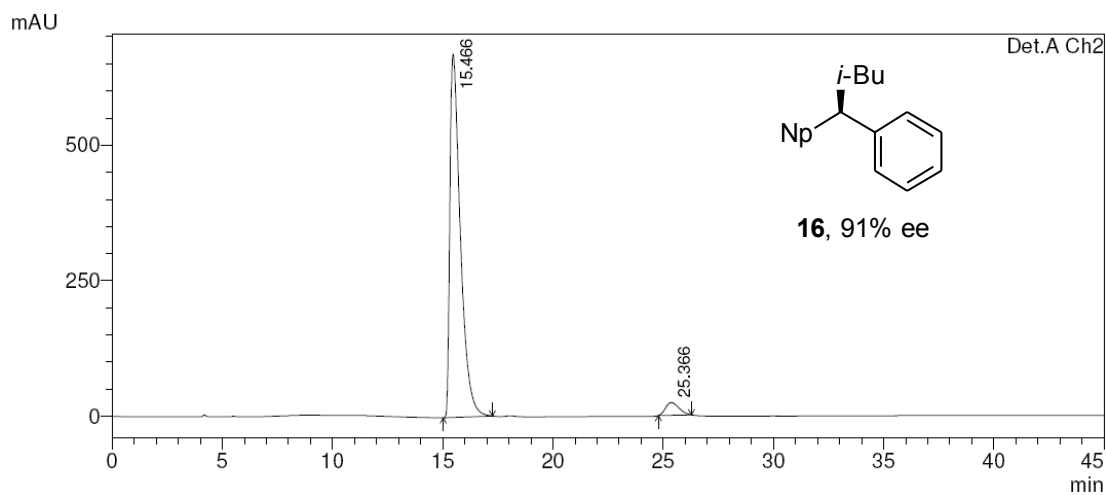

Detector A Ch2 220nm

| Peak# | Ret. Time | Area     | Height | Area %  | Height % |
|-------|-----------|----------|--------|---------|----------|
| 1     | 15.466    | 22211081 | 670111 | 95.721  | 96.614   |
| 2     | 25.366    | 992790   | 23482  | 4.279   | 3.386    |
| Total |           | 23203871 | 693593 | 100.000 | 100.000  |

**Compound 17, racemic**

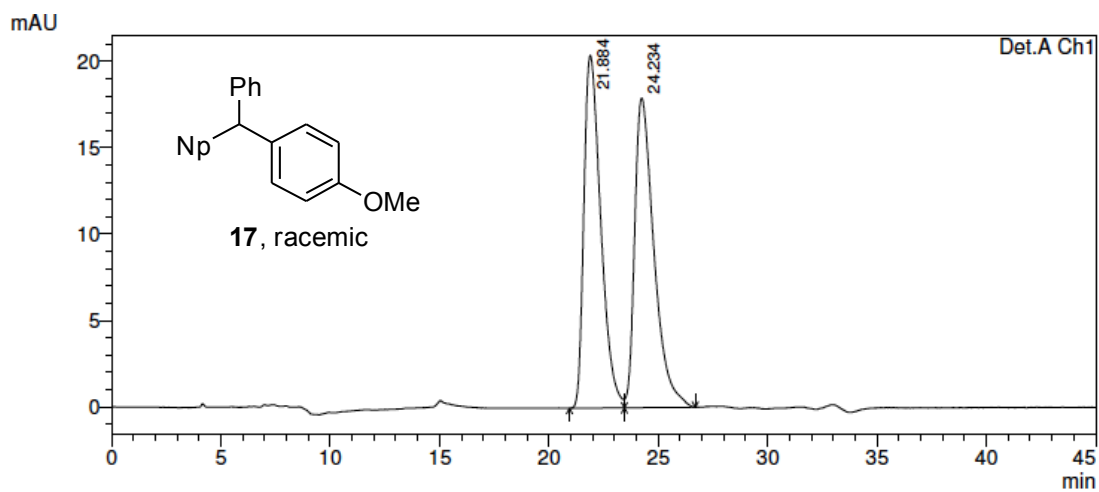

Detector A Ch1 254nm

| Peak# | Ret. Time | Area    | Height | Area %  | Height % |
|-------|-----------|---------|--------|---------|----------|
| 1     | 21.884    | 1094878 | 20418  | 49.887  | 53.263   |
| 2     | 24.234    | 1099828 | 17916  | 50.113  | 46.737   |
| Total |           | 2194707 | 38334  | 100.000 | 100.000  |

**Compound 17, 86% ee**

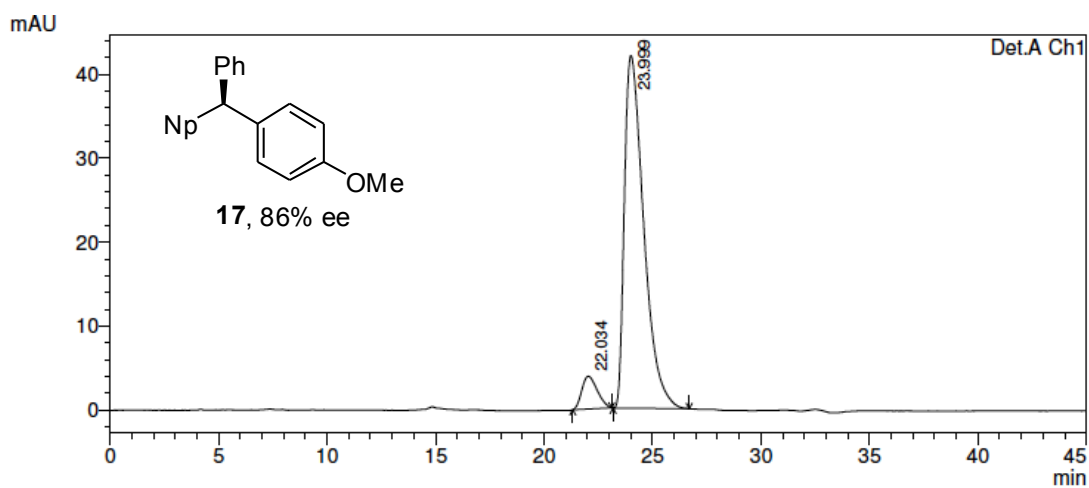

Detector A Ch1 254nm

| Peak# | Ret. Time | Area    | Height | Area %  | Height % |
|-------|-----------|---------|--------|---------|----------|
| 1     | 22.034    | 191831  | 3896   | 6.858   | 8.490    |
| 2     | 23.999    | 2605492 | 41994  | 93.142  | 91.510   |
| Total |           | 2797324 | 45890  | 100.000 | 100.000  |

### Compound 18, racemic

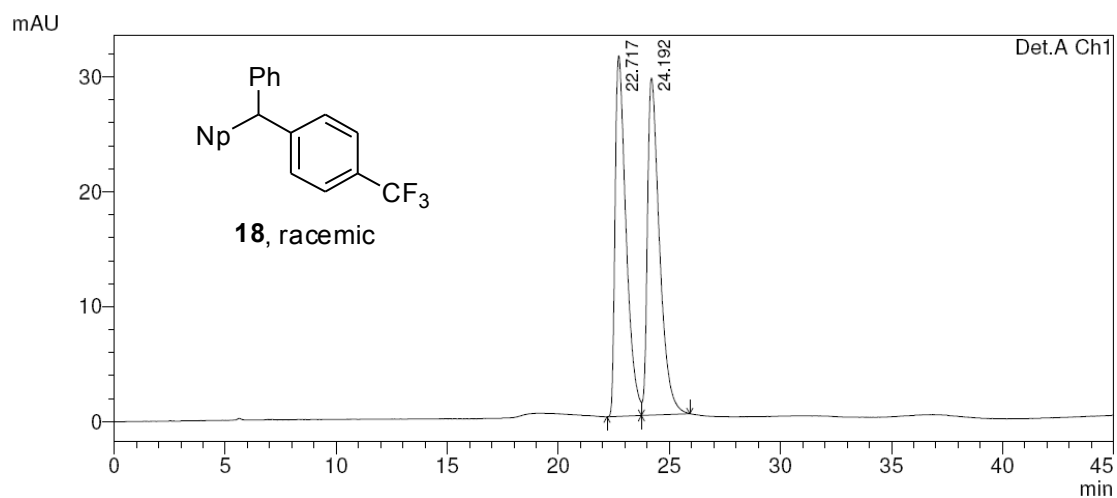

Detector A Ch1 254nm

| Peak# | Ret. Time | Area    | Height | Area %  | Height % |
|-------|-----------|---------|--------|---------|----------|
| 1     | 22.717    | 1082361 | 31364  | 49.305  | 51.676   |
| 2     | 24.192    | 1112865 | 29329  | 50.695  | 48.324   |
| Total |           | 2195226 | 60693  | 100.000 | 100.000  |

### Compound 18, 80% ee

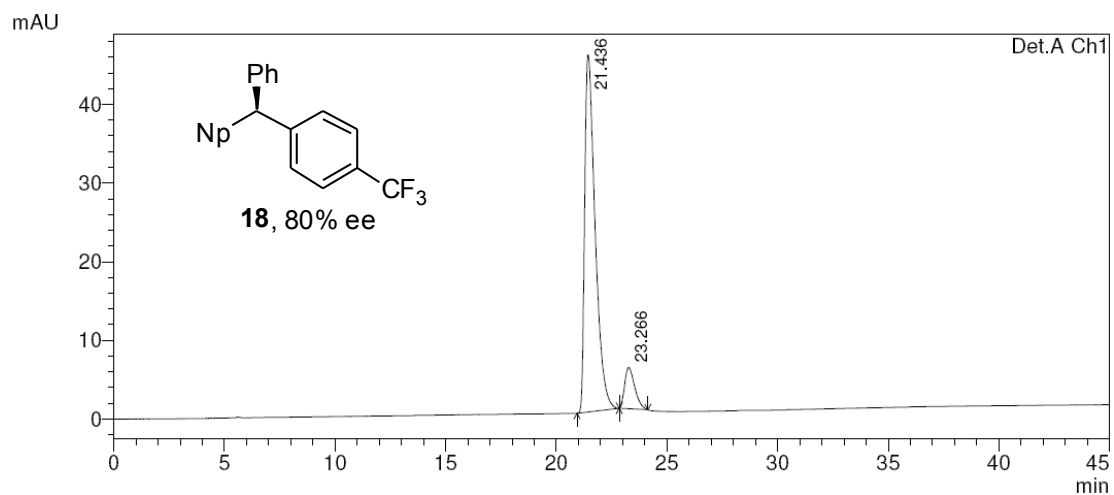

Detector A Ch1 254nm

| Peak# | Ret. Time | Area    | Height | Area %  | Height % |
|-------|-----------|---------|--------|---------|----------|
| 1     | 21.436    | 1487789 | 45441  | 89.984  | 89.669   |
| 2     | 23.266    | 165603  | 5235   | 10.016  | 10.331   |
| Total |           | 1653392 | 50676  | 100.000 | 100.000  |

**Compound 19, racemic**

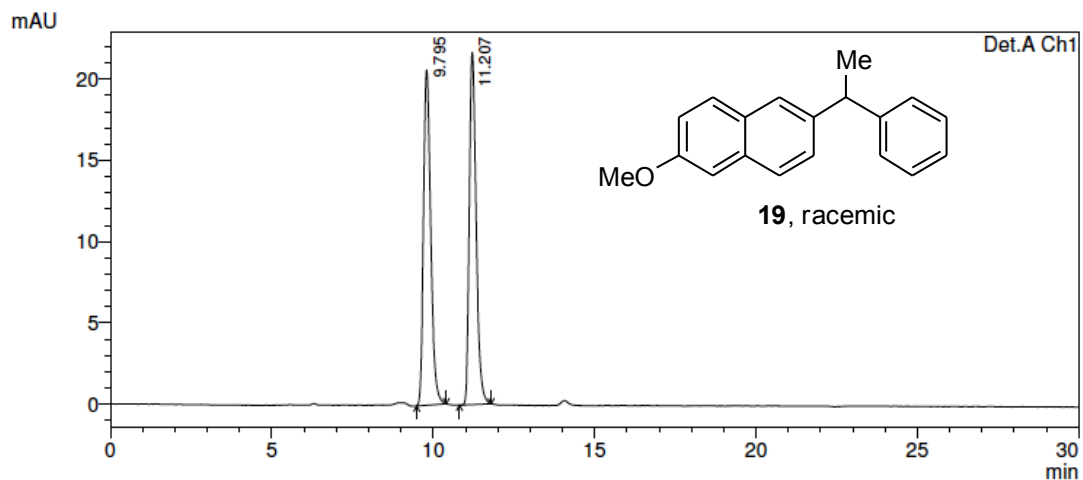

Detector A Ch1 254nm

| Peak# | Ret. Time | Area   | Height | Area %  | Height % |
|-------|-----------|--------|--------|---------|----------|
| 1     | 9.795     | 319664 | 20638  | 50.251  | 48.794   |
| 2     | 11.207    | 316471 | 21658  | 49.749  | 51.206   |
| Total |           | 636135 | 42296  | 100.000 | 100.000  |

**Compound 19, 93% ee**

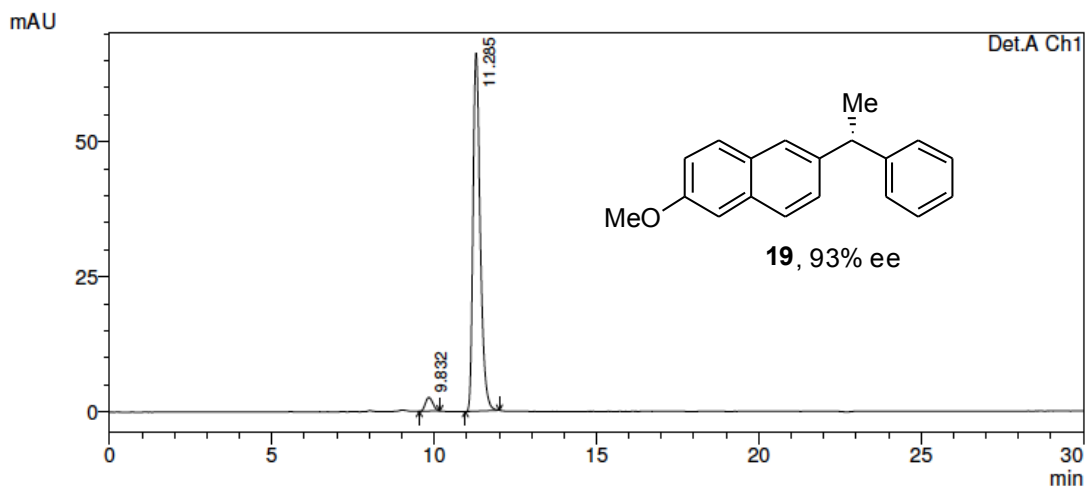

Detector A Ch1 254nm

| Peak# | Ret. Time | Area    | Height | Area %  | Height % |
|-------|-----------|---------|--------|---------|----------|
| 1     | 9.832     | 40139   | 2543   | 3.773   | 3.694    |
| 2     | 11.285    | 1023789 | 66290  | 96.227  | 96.306   |
| Total |           | 1063928 | 68833  | 100.000 | 100.000  |

### Compound 20, racemic

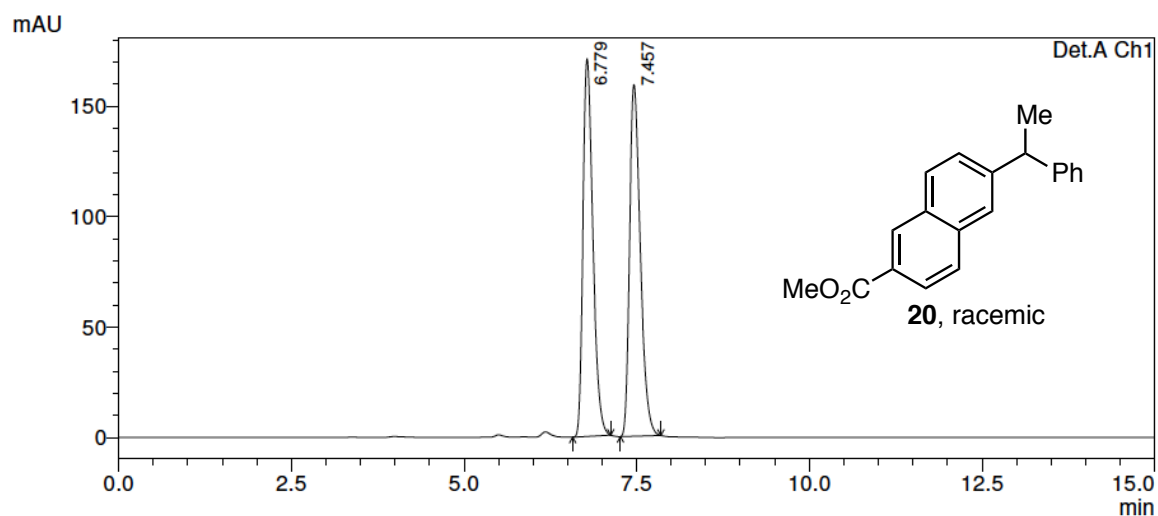

Detector A Ch1 254nm

| Peak# | Ret. Time | Area    | Height | Area %  | Height % |
|-------|-----------|---------|--------|---------|----------|
| 1     | 6.779     | 1705134 | 171182 | 49.744  | 51.809   |
| 2     | 7.457     | 1722698 | 159230 | 50.256  | 48.191   |
| Total |           | 3427831 | 330412 | 100.000 | 100.000  |

### Compound 20, 94% ee

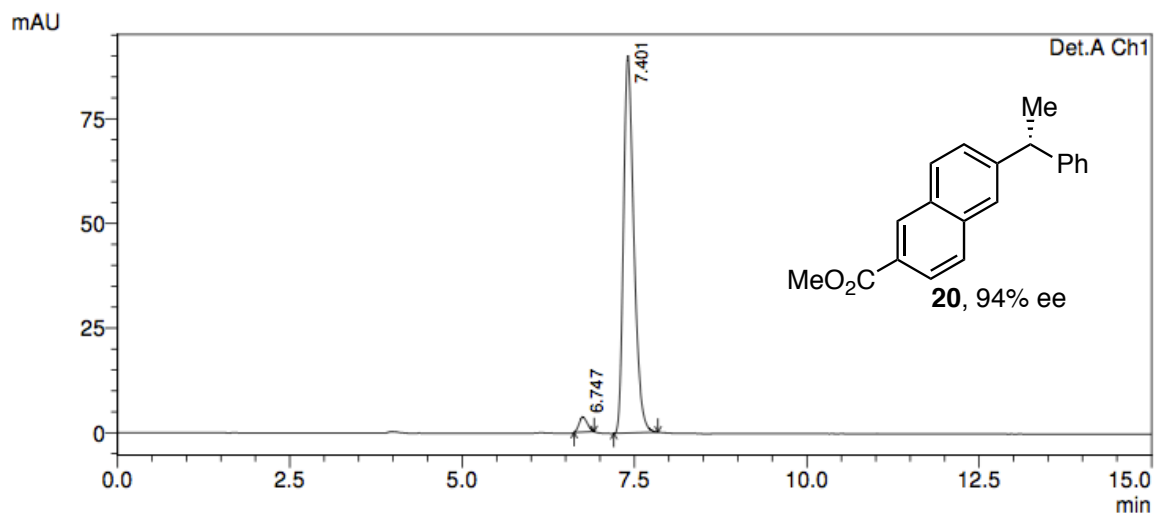

Detector A Ch1 254nm

| Peak# | Ret. Time | Area   | Height | Area %  | Height % |
|-------|-----------|--------|--------|---------|----------|
| 1     | 6.747     | 30236  | 3609   | 3.099   | 3.847    |
| 2     | 7.401     | 945469 | 90198  | 96.901  | 96.153   |
| Total |           | 975705 | 93807  | 100.000 | 100.000  |

### Compound 21, racemic

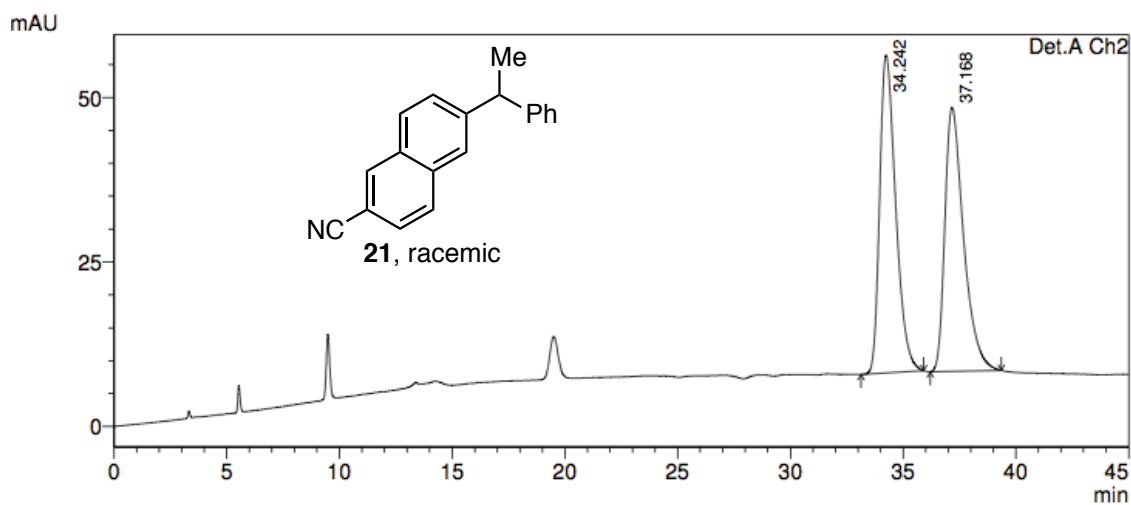

Detector A Ch2 230nm

| Peak# | Ret. Time | Area    | Height | Area %  | Height % |
|-------|-----------|---------|--------|---------|----------|
| 1     | 34.242    | 2385648 | 48276  | 50.718  | 54.631   |
| 2     | 37.168    | 2318059 | 40092  | 49.282  | 45.369   |
| Total |           | 4703707 | 88368  | 100.000 | 100.000  |

### Compound 21, 89% ee

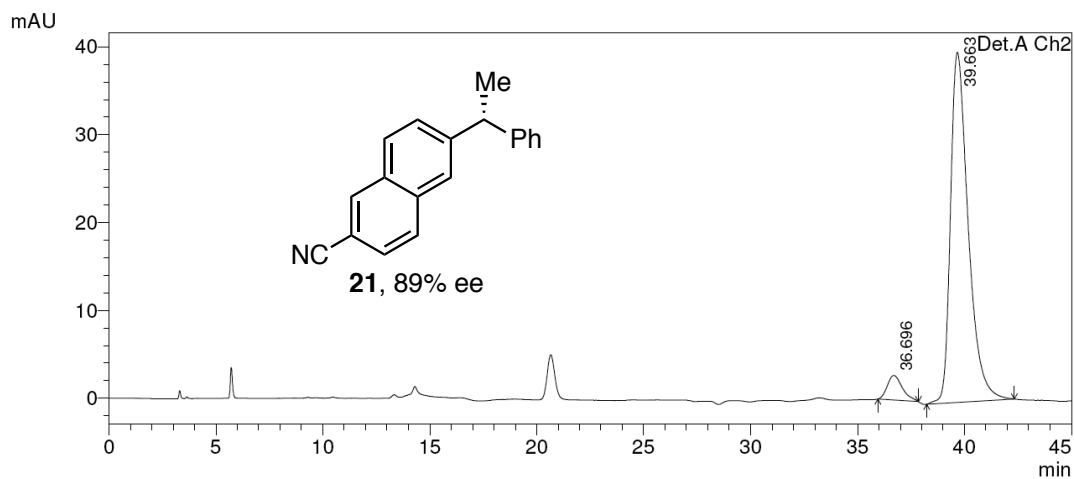

Detector A Ch2 230nm

| Peak# | Ret. Time | Area    | Height | Area %  | Height % |
|-------|-----------|---------|--------|---------|----------|
| 1     | 32.051    | 57812   | 1412   | 5.285   | 6.564    |
| 2     | 34.791    | 1036032 | 20095  | 94.715  | 93.436   |
| Total |           | 1093843 | 21507  | 100.000 | 100.000  |



### Compound 22, racemic

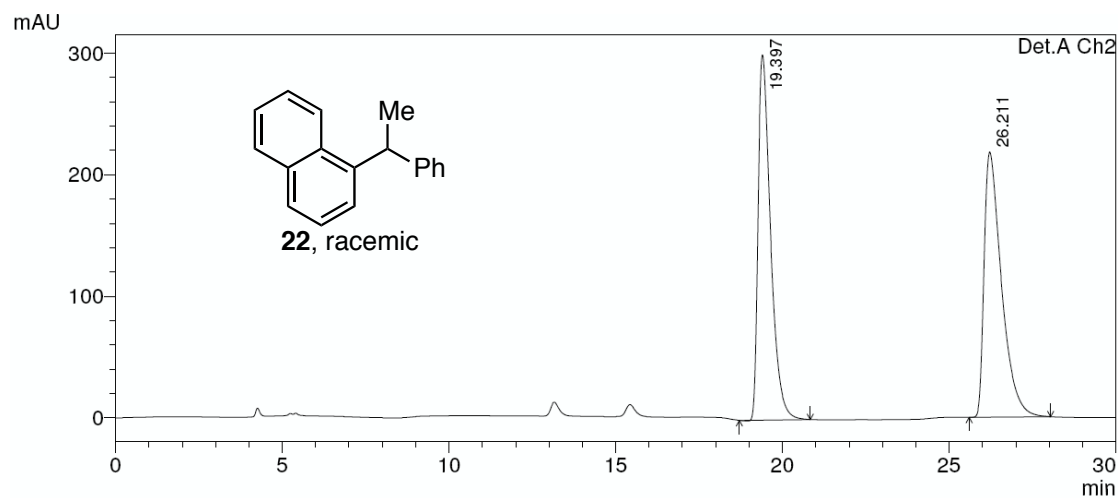

Detector A Ch2 220nm

| Peak# | Ret. Time | Area     | Height | Area %  | Height % |
|-------|-----------|----------|--------|---------|----------|
| 1     | 19.397    | 7810522  | 300253 | 49.720  | 57.922   |
| 2     | 26.211    | 7898490  | 218125 | 50.280  | 42.078   |
| Total |           | 15709011 | 518378 | 100.000 | 100.000  |

### Compound 22, 73% ee

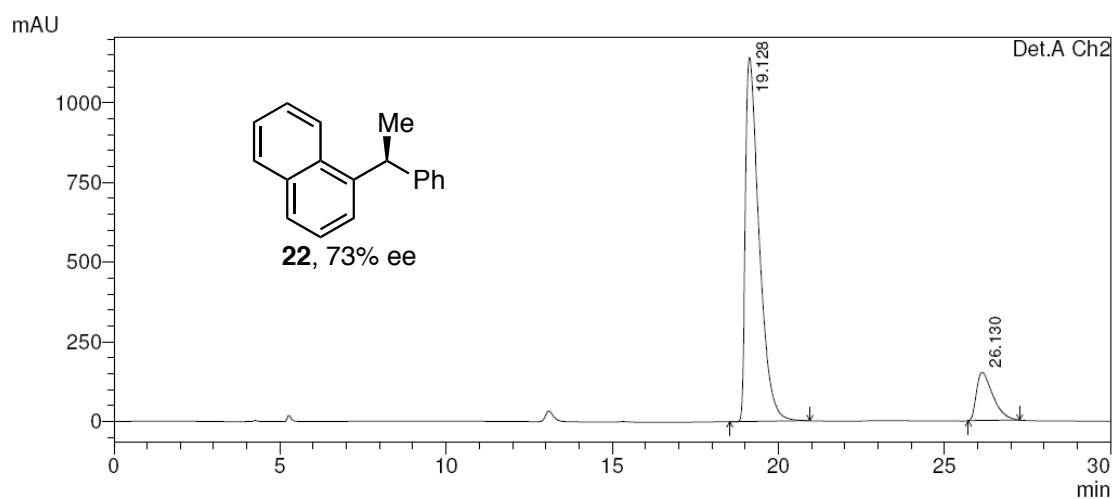

Detector A Ch2 220nm

| Peak# | Ret. Time | Area     | Height  | Area %  | Height % |
|-------|-----------|----------|---------|---------|----------|
| 1     | 19.128    | 32816995 | 1143059 | 86.387  | 88.309   |
| 2     | 26.130    | 5171503  | 151332  | 13.613  | 11.691   |
| Total |           | 37988498 | 1294391 | 100.000 | 100.000  |

### Compound 23, racemic

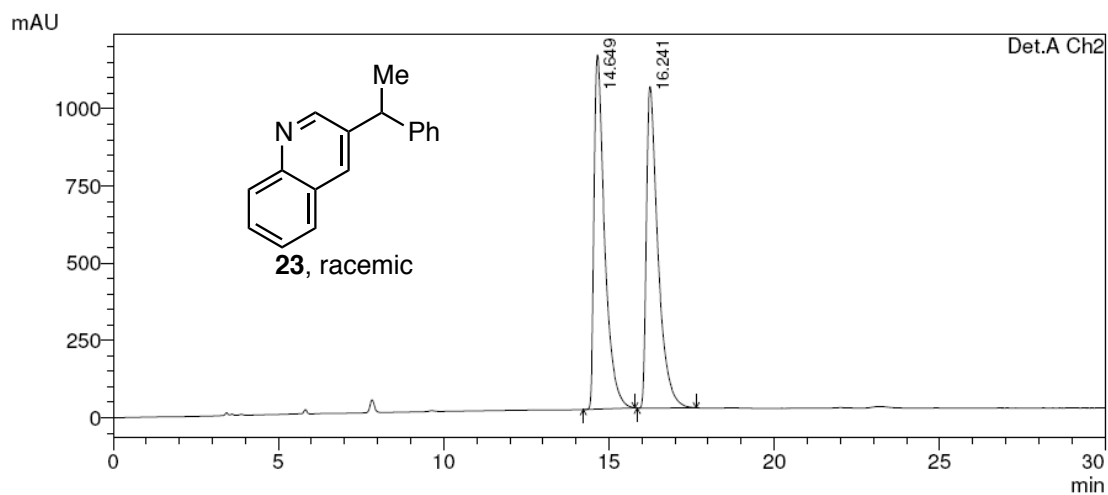

Detector A Ch2 210nm

| Peak# | Ret. Time | Area     | Height  | Area %  | Height % |
|-------|-----------|----------|---------|---------|----------|
| 1     | 14.649    | 25499869 | 1145829 | 50.011  | 52.413   |
| 2     | 16.241    | 25488158 | 1040344 | 49.989  | 47.587   |
| Total |           | 50988027 | 2186173 | 100.000 | 100.000  |

### Compound 23, 58% ee

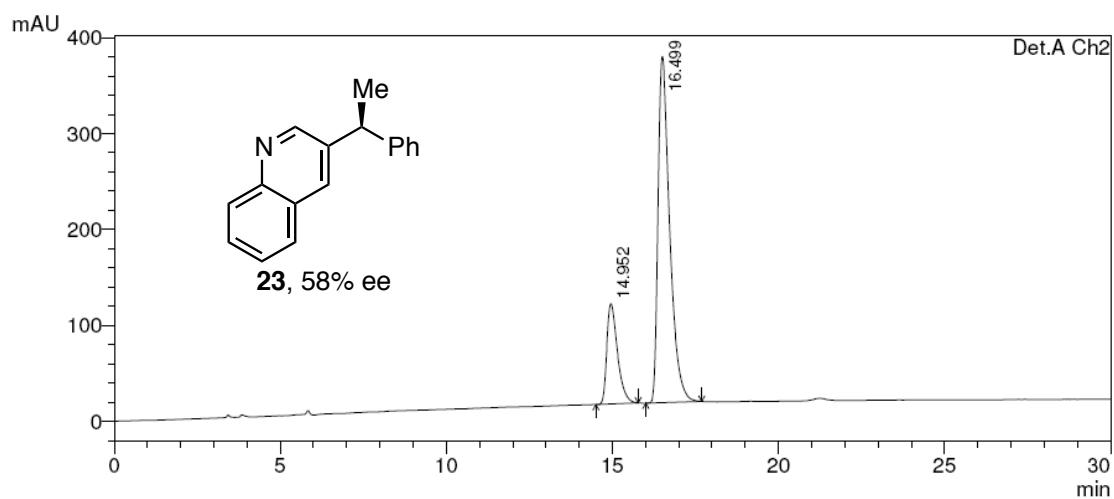

Detector A Ch2 210nm

| Peak# | Ret. Time | Area     | Height | Area %  | Height % |
|-------|-----------|----------|--------|---------|----------|
| 1     | 14.952    | 2329178  | 104604 | 20.956  | 22.464   |
| 2     | 16.499    | 8785565  | 361045 | 79.044  | 77.536   |
| Total |           | 11114743 | 465649 | 100.000 | 100.000  |

### Compound 24, racemic

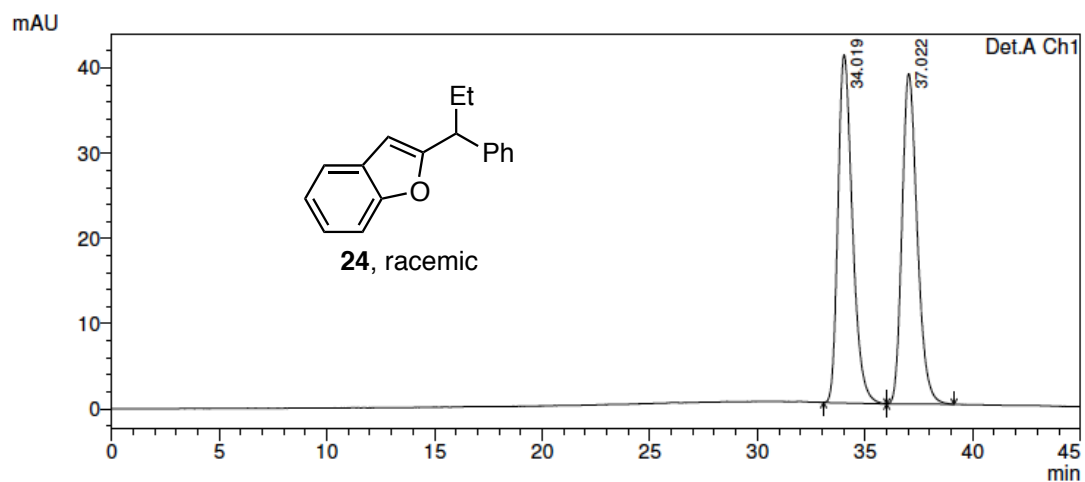

Detector A Ch1 254nm

| Peak# | Ret. Time | Area    | Height | Area %  | Height % |
|-------|-----------|---------|--------|---------|----------|
| 1     | 34.019    | 1909990 | 40855  | 50.048  | 51.323   |
| 2     | 37.022    | 1906321 | 38748  | 49.952  | 48.677   |
| Total |           | 3816311 | 79603  | 100.000 | 100.000  |

### Compound 24, 72% ee

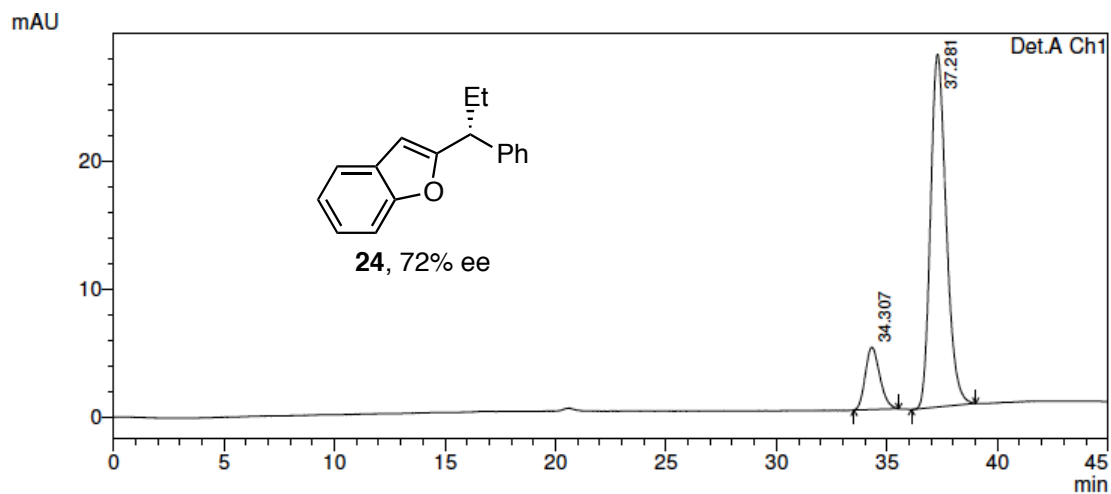

Detector A Ch1 254nm

| Peak# | Ret. Time | Area    | Height | Area %  | Height % |
|-------|-----------|---------|--------|---------|----------|
| 1     | 34.307    | 221554  | 4844   | 14.011  | 14.963   |
| 2     | 37.281    | 1359765 | 27528  | 85.989  | 85.037   |
| Total |           | 1581318 | 32372  | 100.000 | 100.000  |

### Compound 25, racemic

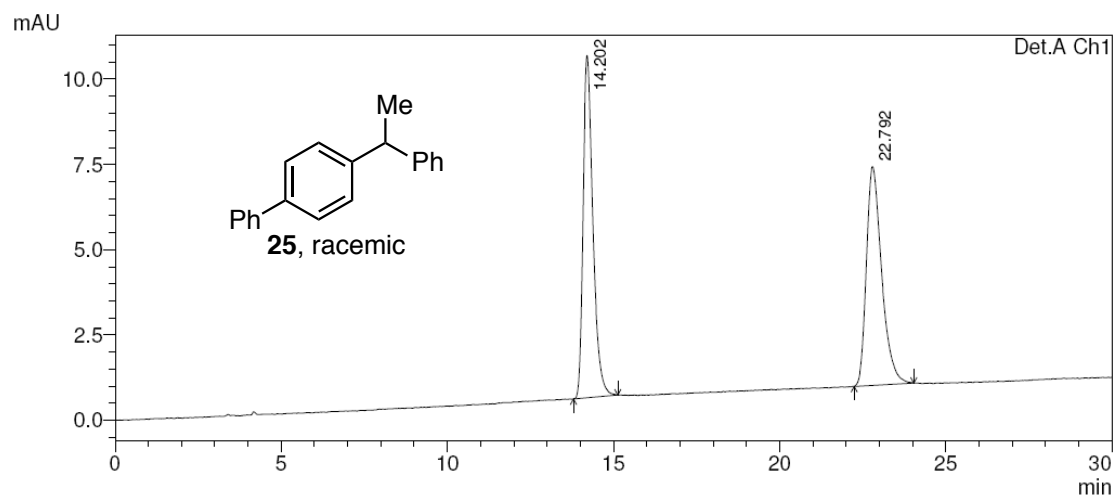

Detector A Ch1 254nm

| Peak# | Ret. Time | Area   | Height | Area %  | Height % |
|-------|-----------|--------|--------|---------|----------|
| 1     | 14.202    | 205998 | 10036  | 50.049  | 60.984   |
| 2     | 22.792    | 205596 | 6420   | 49.951  | 39.016   |
| Total |           | 411595 | 16456  | 100.000 | 100.000  |

### Compound 25, 84% ee

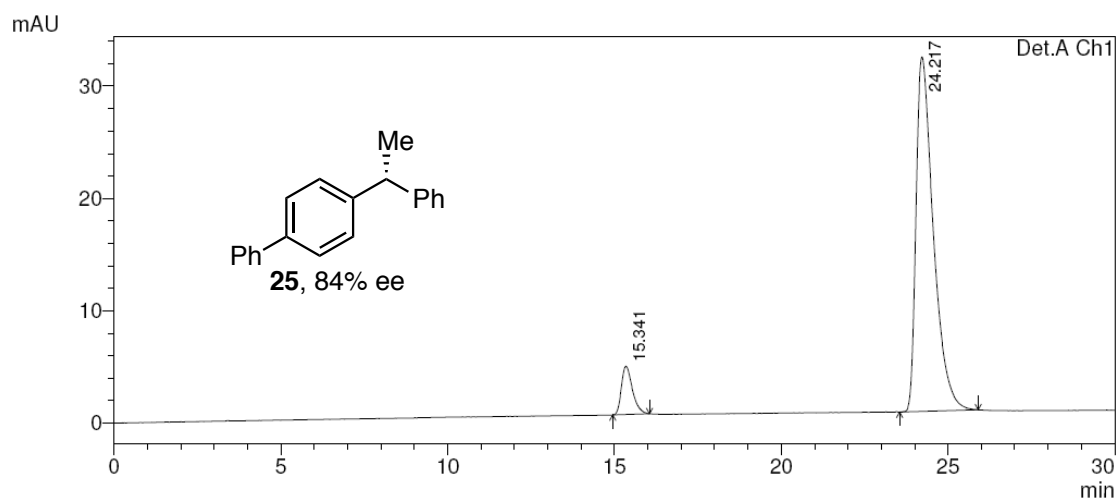

Detector A Ch1 254nm

| Peak# | Ret. Time | Area    | Height | Area %  | Height % |
|-------|-----------|---------|--------|---------|----------|
| 1     | 15.341    | 98693   | 4298   | 7.974   | 11.991   |
| 2     | 24.217    | 1138964 | 31549  | 92.026  | 88.009   |
| Total |           | 1237657 | 35848  | 100.000 | 100.000  |

### Compound 1a, racemic

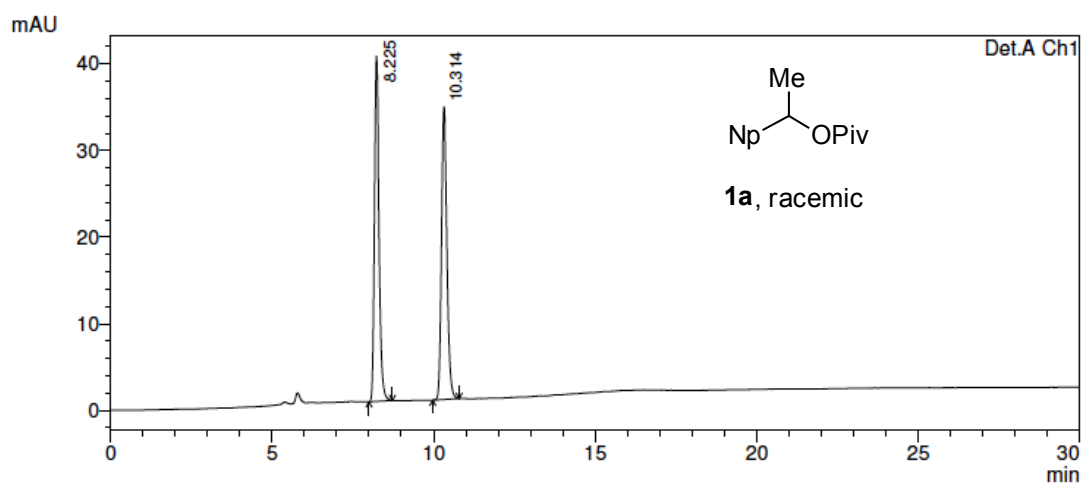

Detector A Ch1 254nm

| Peak# | Ret. Time | Area   | Height | Area %  | Height % |
|-------|-----------|--------|--------|---------|----------|
| 1     | 8.225     | 396397 | 39831  | 49.995  | 54.121   |
| 2     | 10.314    | 396480 | 33765  | 50.005  | 45.879   |
| Total |           | 792877 | 73597  | 100.000 | 100.000  |

### Compound 1a, >99% ee

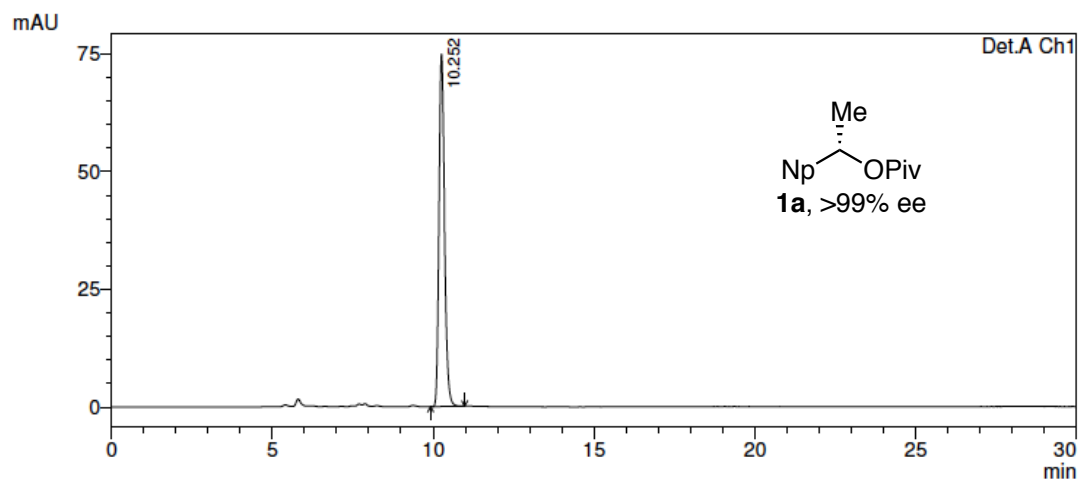

Detector A Ch1 254nm

| Peak# | Ret. Time | Area   | Height | Area %  | Height % |
|-------|-----------|--------|--------|---------|----------|
| 1     | 10.252    | 897607 | 74803  | 100.000 | 100.000  |
| Total |           | 897607 | 74803  | 100.000 | 100.000  |

### Compound 1b, racemic

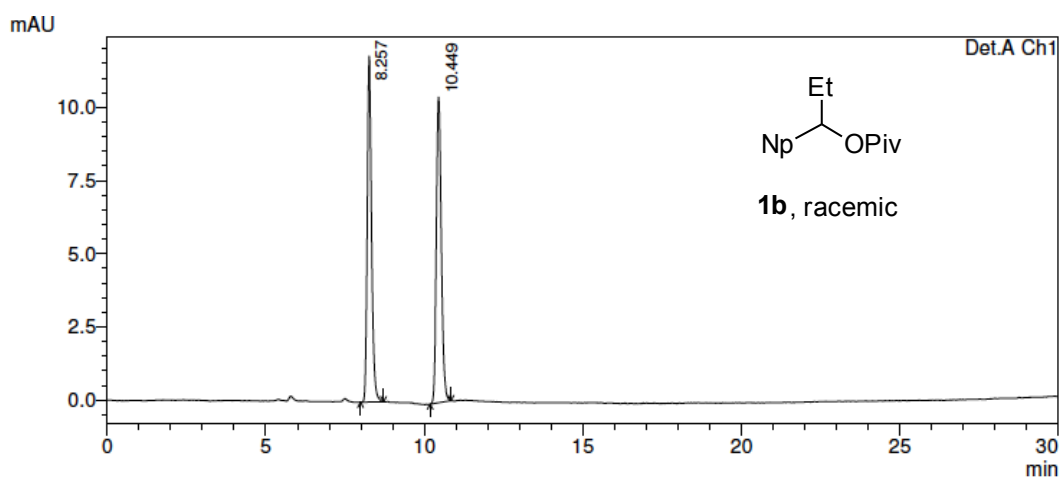

Detector A Ch1 254nm

| Peak# | Ret. Time | Area   | Height | Area %  | Height % |
|-------|-----------|--------|--------|---------|----------|
| 1     | 8.257     | 114388 | 11828  | 50.272  | 53.100   |
| 2     | 10.449    | 113152 | 10447  | 49.728  | 46.900   |
| Total |           | 227540 | 22276  | 100.000 | 100.000  |

### Compound 1b, >99% ee

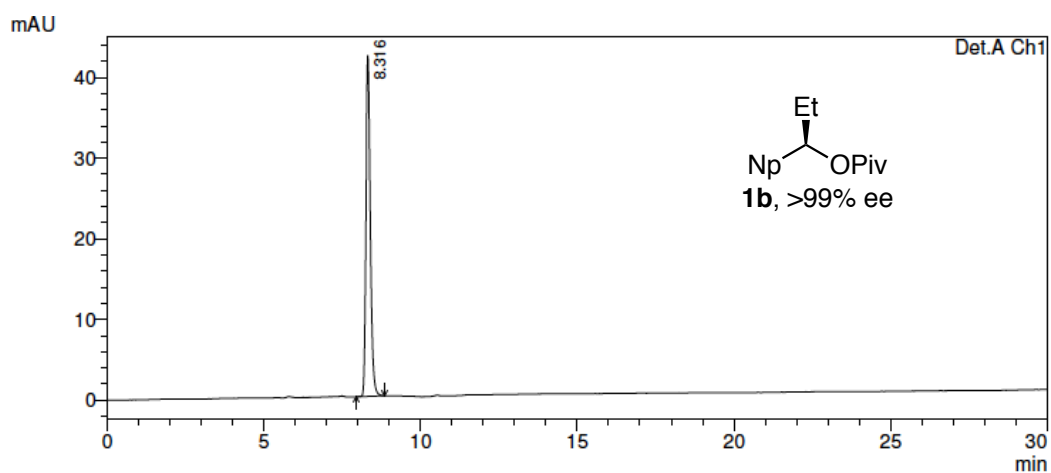

Detector A Ch1 254nm

| Peak# | Ret. Time | Area   | Height | Area %  | Height % |
|-------|-----------|--------|--------|---------|----------|
| 1     | 8.316     | 415101 | 42242  | 100.000 | 100.000  |
| Total |           | 415101 | 42242  | 100.000 | 100.000  |

**Compound 1c, racemic**

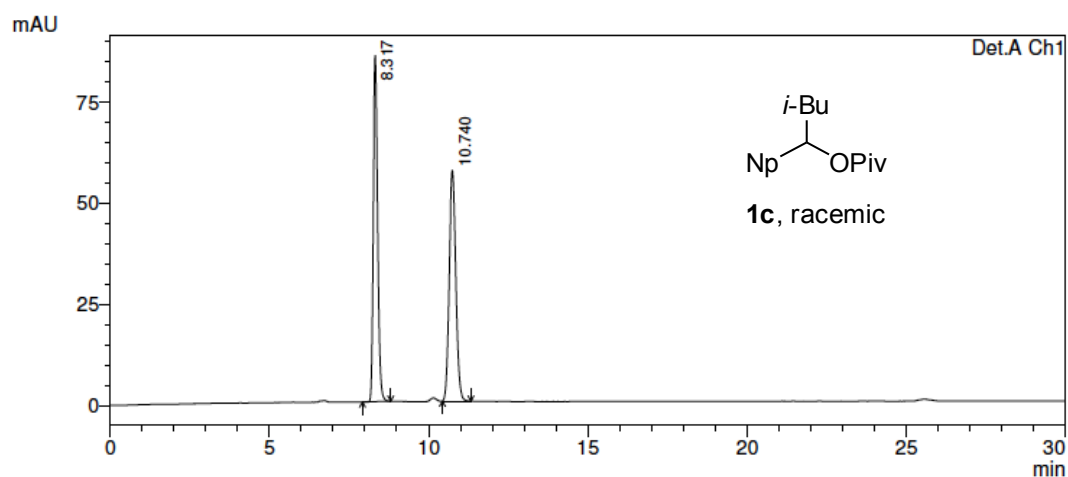

Detector A Ch1 254nm

| Peak# | Ret. Time | Area    | Height | Area %  | Height % |
|-------|-----------|---------|--------|---------|----------|
| 1     | 8.317     | 820067  | 85600  | 49.944  | 59.987   |
| 2     | 10.740    | 821921  | 57098  | 50.056  | 40.013   |
| Total |           | 1641989 | 142698 | 100.000 | 100.000  |

**Compound 1c, 93% ee**

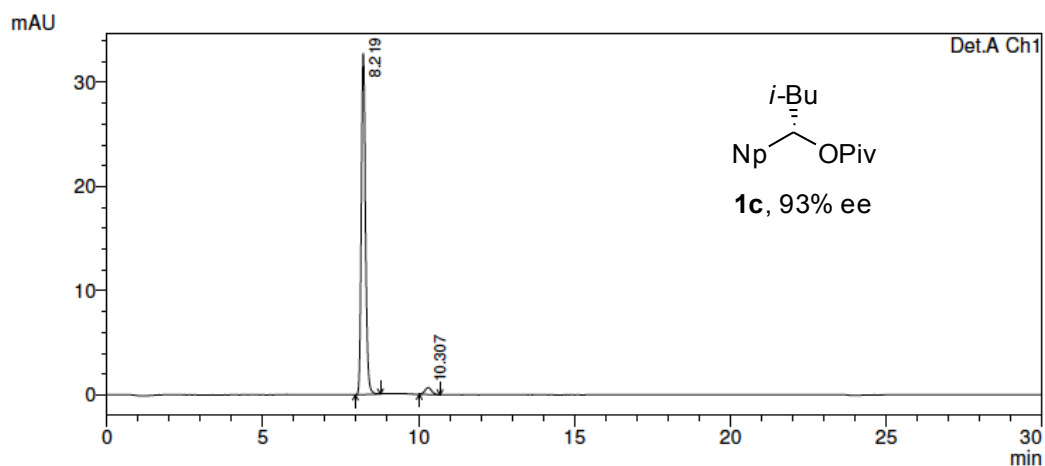

Detector A Ch1 254nm

| Peak# | Ret. Time | Area   | Height | Area %  | Height % |
|-------|-----------|--------|--------|---------|----------|
| 1     | 8.219     | 308202 | 32752  | 96.654  | 97.974   |
| 2     | 10.307    | 10668  | 677    | 3.346   | 2.026    |
| Total |           | 318870 | 33429  | 100.000 | 100.000  |

### Compound 1d, racemic

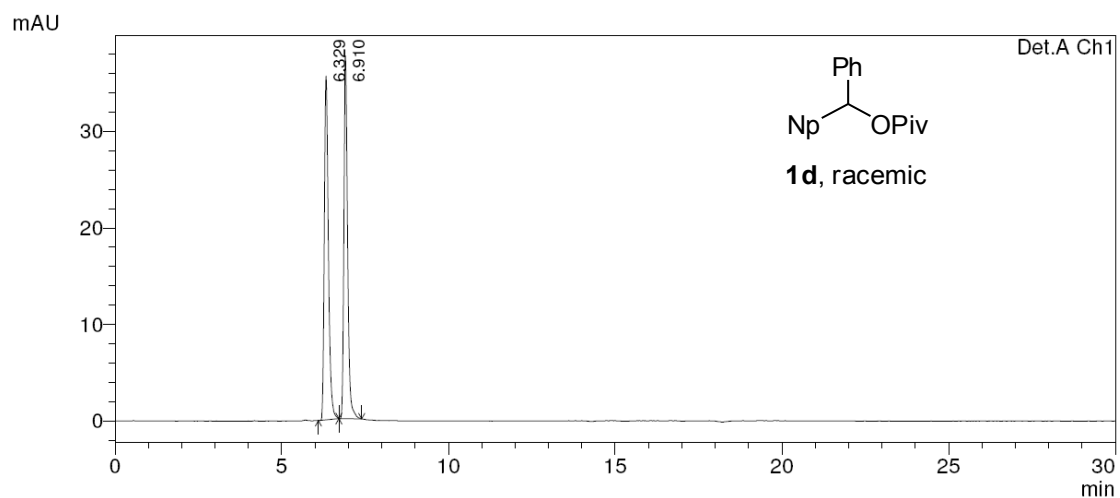

Detector A Ch1 254nm

| Peak# | Ret. Time | Area   | Height | Area %  | Height % |
|-------|-----------|--------|--------|---------|----------|
| 1     | 6.329     | 297105 | 35629  | 49.891  | 48.644   |
| 2     | 6.910     | 298408 | 37615  | 50.109  | 51.356   |
| Total |           | 595513 | 73244  | 100.000 | 100.000  |

### Compound 1d, >99% ee

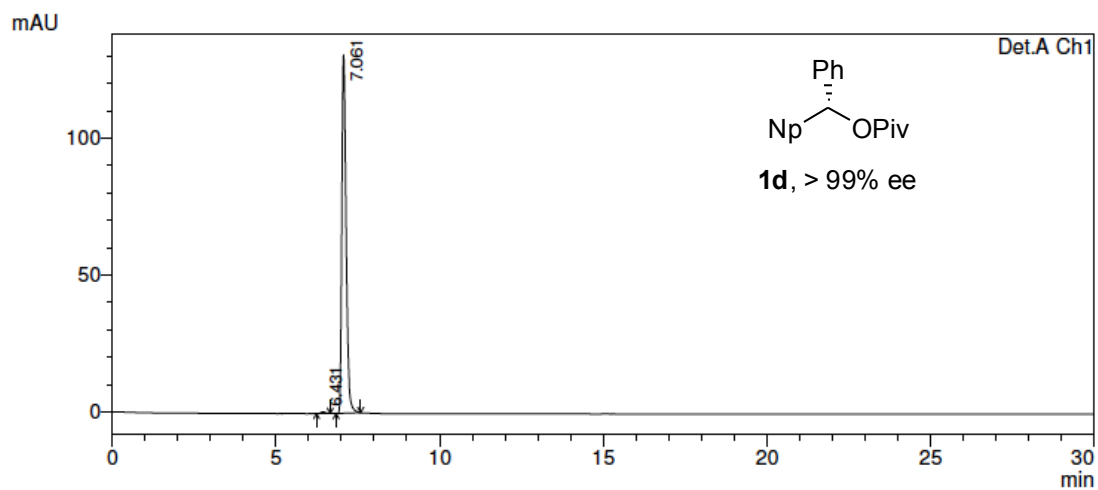

Detector A Ch1 254nm

| Peak# | Ret. Time | Area    | Height | Area %  | Height % |
|-------|-----------|---------|--------|---------|----------|
| 1     | 6.431     | 5458    | 661    | 0.464   | 0.503    |
| 2     | 7.061     | 1171050 | 130897 | 99.536  | 99.497   |
| Total |           | 1176509 | 131558 | 100.000 | 100.000  |



### Compound 1e, racemic

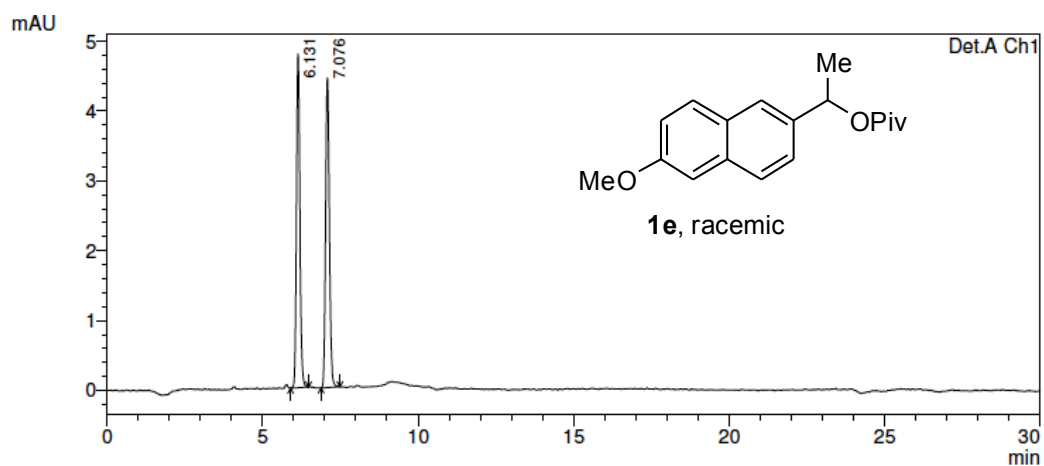

Detector A Ch1 254nm

| Peak# | Ret. Time | Area  | Height | Area %  | Height % |
|-------|-----------|-------|--------|---------|----------|
| 1     | 6.131     | 37054 | 4787   | 50.237  | 51.891   |
| 2     | 7.076     | 36705 | 4438   | 49.763  | 48.109   |
| Total |           | 73759 | 9224   | 100.000 | 100.000  |

### Compound 1e, >99% ee

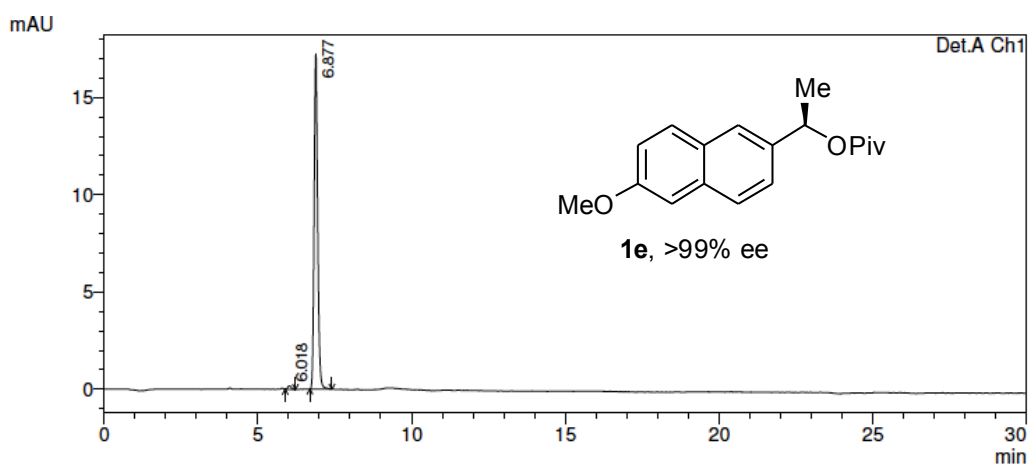

Detector A Ch1 254nm

| Peak# | Ret. Time | Area   | Height | Area %  | Height % |
|-------|-----------|--------|--------|---------|----------|
| 1     | 6.018     | 1376   | 185    | 0.962   | 1.060    |
| 2     | 6.877     | 141653 | 17224  | 99.038  | 98.940   |
| Total |           | 143029 | 17409  | 100.000 | 100.000  |

### Compound 1f, racemic

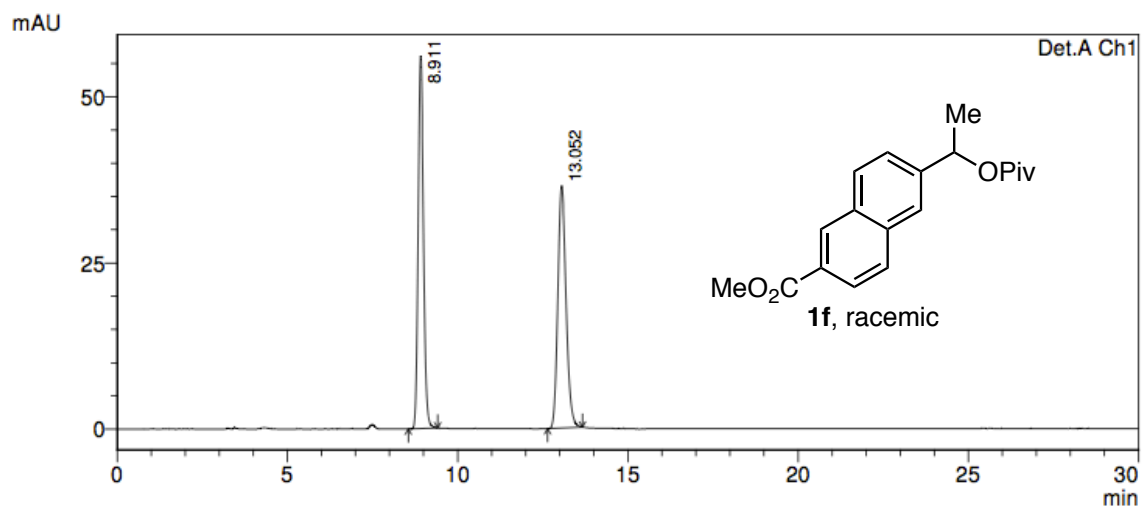

Detector A Ch1 254nm

| Peak# | Ret. Time | Area    | Height | Area %  | Height % |
|-------|-----------|---------|--------|---------|----------|
| 1     | 8.911     | 613049  | 56085  | 50.015  | 60.609   |
| 2     | 13.052    | 612685  | 36451  | 49.985  | 39.391   |
| Total |           | 1225734 | 92536  | 100.000 | 100.000  |

### Compound 1f, 98% ee

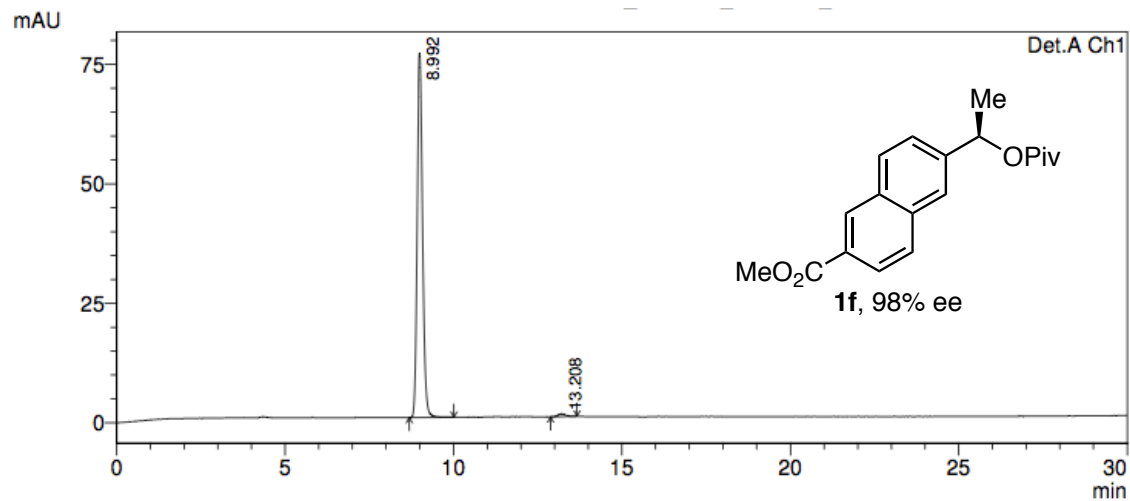

Detector A Ch1 254nm

| Peak# | Ret. Time | Area   | Height | Area %  | Height % |
|-------|-----------|--------|--------|---------|----------|
| 1     | 8.992     | 851729 | 76272  | 99.004  | 99.274   |
| 2     | 13.208    | 8567   | 557    | 0.996   | 0.726    |
| Total |           | 860296 | 76830  | 100.000 | 100.000  |

### Compound 1g, racemic

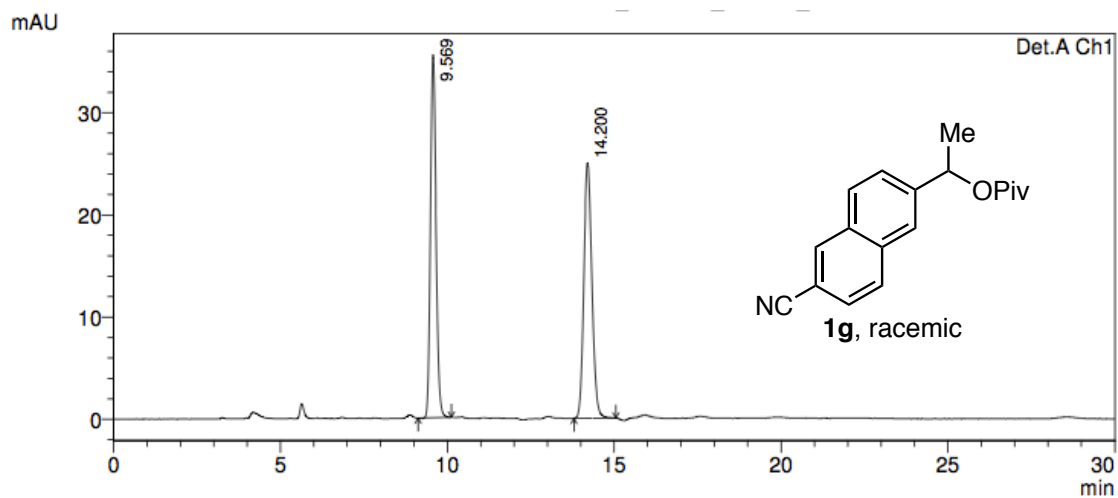

Detector A Ch1 254nm

| Peak# | Ret. Time | Area   | Height | Area %  | Height % |
|-------|-----------|--------|--------|---------|----------|
| 1     | 9.569     | 415129 | 35588  | 49.625  | 58.719   |
| 2     | 14.200    | 421402 | 25019  | 50.375  | 41.281   |
| Total |           | 836531 | 60608  | 100.000 | 100.000  |

### Compound 1g, 95% ee

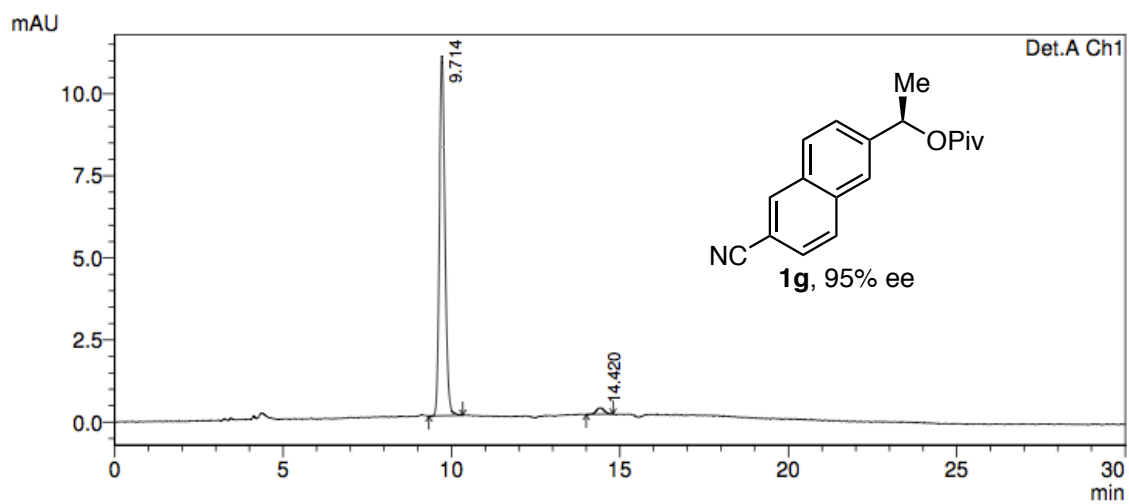

Detector A Ch1 254nm

| Peak# | Ret. Time | Area   | Height | Area %  | Height % |
|-------|-----------|--------|--------|---------|----------|
| 1     | 9.714     | 126744 | 10973  | 97.412  | 98.176   |
| 2     | 14.420    | 3367   | 204    | 2.588   | 1.824    |
| Total |           | 130111 | 11177  | 100.000 | 100.000  |

### Compound 1h, racemic

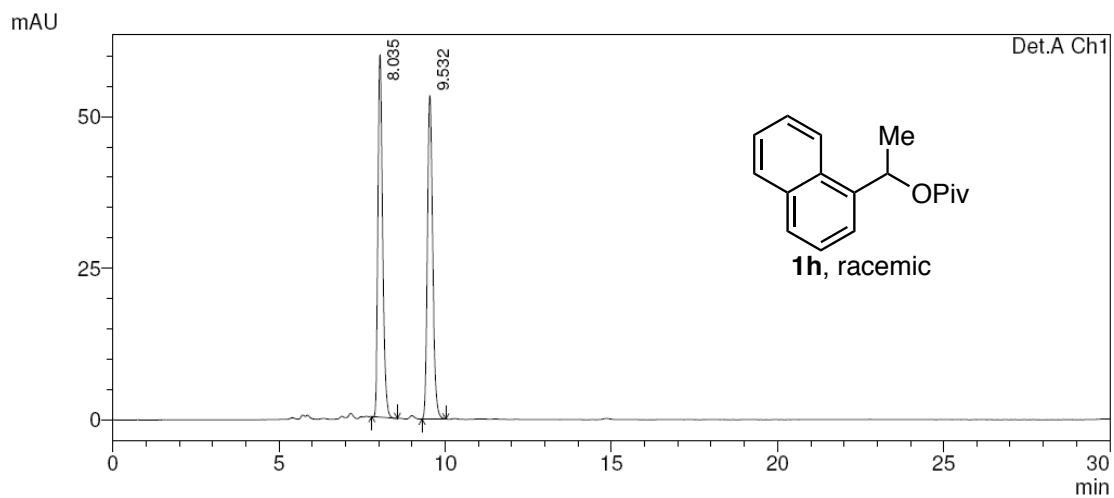

Detector A Ch1 254nm

| Peak# | Ret. Time | Area    | Height | Area %  | Height % |
|-------|-----------|---------|--------|---------|----------|
| 1     | 8.035     | 579672  | 59706  | 49.676  | 52.828   |
| 2     | 9.532     | 587238  | 53313  | 50.324  | 47.172   |
| Total |           | 1166910 | 113019 | 100.000 | 100.000  |

### Compound 1h, 86% ee

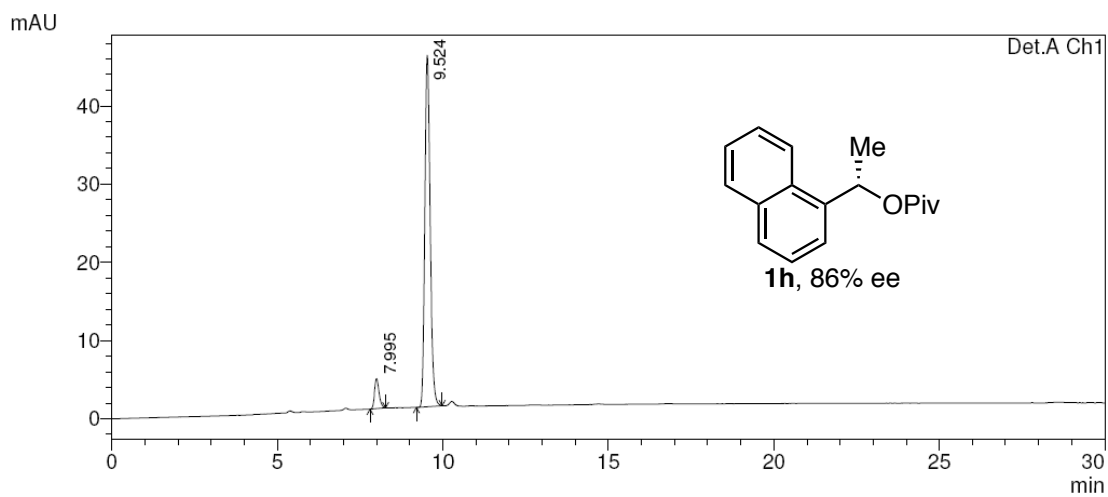

Detector A Ch1 254nm

| Peak# | Ret. Time | Area   | Height | Area %  | Height % |
|-------|-----------|--------|--------|---------|----------|
| 1     | 7.995     | 36367  | 3814   | 6.791   | 7.825    |
| 2     | 9.524     | 499160 | 44924  | 93.209  | 92.175   |
| Total |           | 535527 | 48738  | 100.000 | 100.000  |

### Compound 1i, racemic

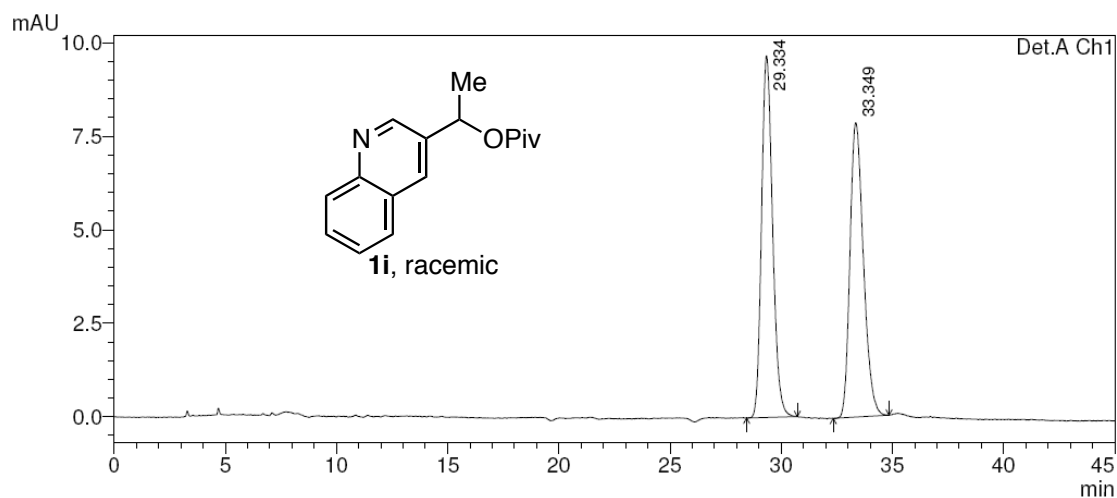

Detector A Ch1 254nm

| Peak# | Ret. Time | Area   | Height | Area %  | Height % |
|-------|-----------|--------|--------|---------|----------|
| 1     | 29.334    | 333054 | 9664   | 50.134  | 55.117   |
| 2     | 33.349    | 331269 | 7870   | 49.866  | 44.883   |
| Total |           | 664323 | 17534  | 100.000 | 100.000  |

### Compound 1i, 82% ee

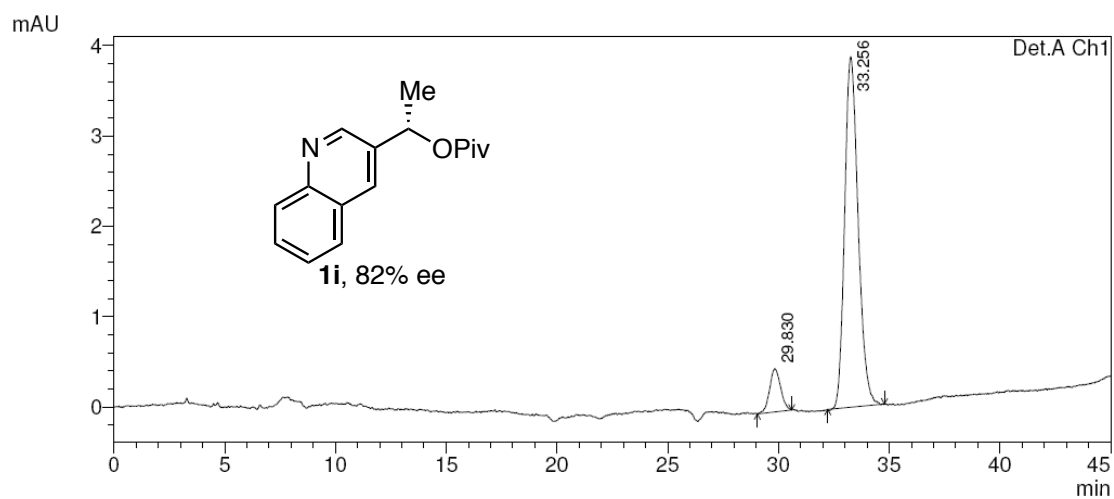

Detector A Ch1 254nm

| Peak# | Ret. Time | Area   | Height | Area %  | Height % |
|-------|-----------|--------|--------|---------|----------|
| 1     | 29.830    | 16673  | 481    | 9.218   | 11.024   |
| 2     | 33.256    | 164207 | 3881   | 90.782  | 88.976   |
| Total |           | 180880 | 4362   | 100.000 | 100.000  |

### Compound 1j, racemic

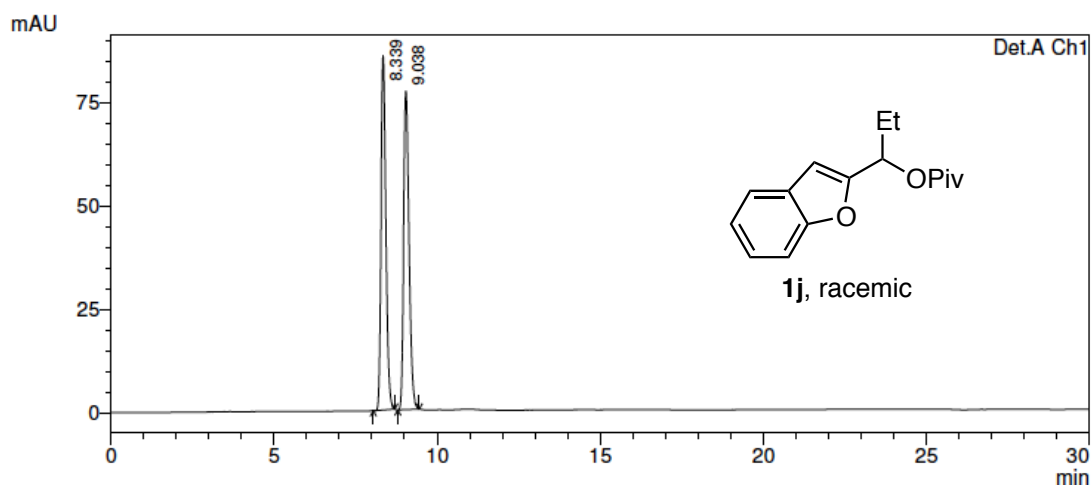

Detector A Ch1 254nm

| Peak# | Ret. Time | Area    | Height | Area %  | Height % |
|-------|-----------|---------|--------|---------|----------|
| 1     | 8.339     | 888842  | 85736  | 50.018  | 52.657   |
| 2     | 9.038     | 888188  | 77084  | 49.982  | 47.343   |
| Total |           | 1777030 | 162821 | 100.000 | 100.000  |

### Compound 1j, 82% ee

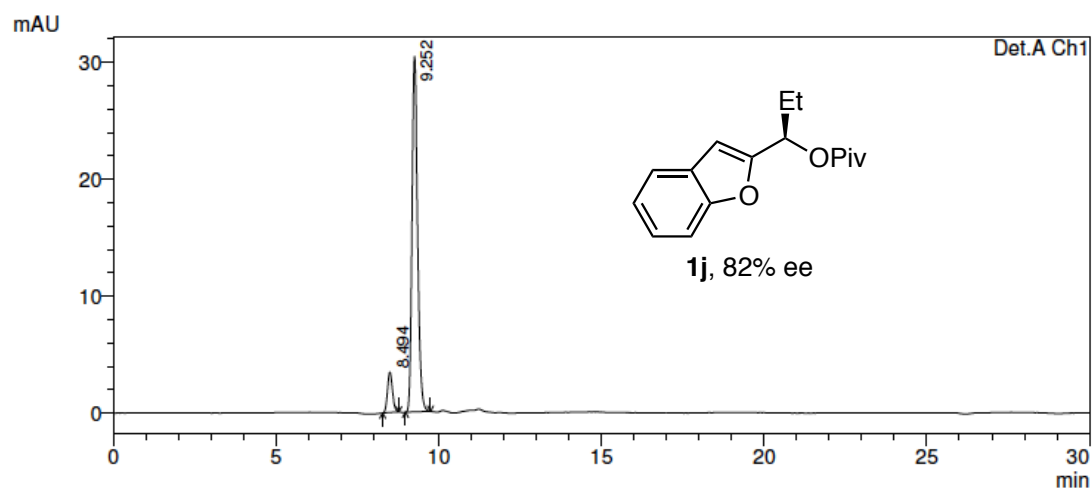

Detector A Ch1 254nm

| Peak# | Ret. Time | Area   | Height | Area %  | Height % |
|-------|-----------|--------|--------|---------|----------|
| 1     | 8.494     | 36076  | 3440   | 9.012   | 10.169   |
| 2     | 9.252     | 364222 | 30391  | 90.988  | 89.831   |
| Total |           | 400298 | 33832  | 100.000 | 100.000  |

### Compound 1k, racemic

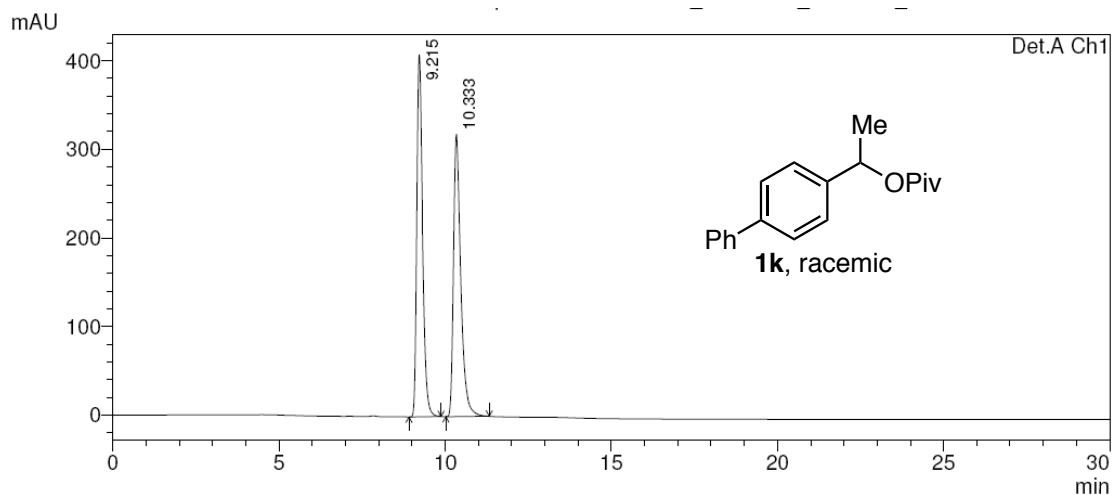

Detector A Ch1 254nm

| Peak# | Ret. Time | Area    | Height | Area %  | Height % |
|-------|-----------|---------|--------|---------|----------|
| 1     | 9.215     | 4946210 | 408528 | 50.233  | 56.198   |
| 2     | 10.333    | 4900271 | 318419 | 49.767  | 43.802   |
| Total |           | 9846481 | 726947 | 100.000 | 100.000  |

### Compound 1k, 93% ee

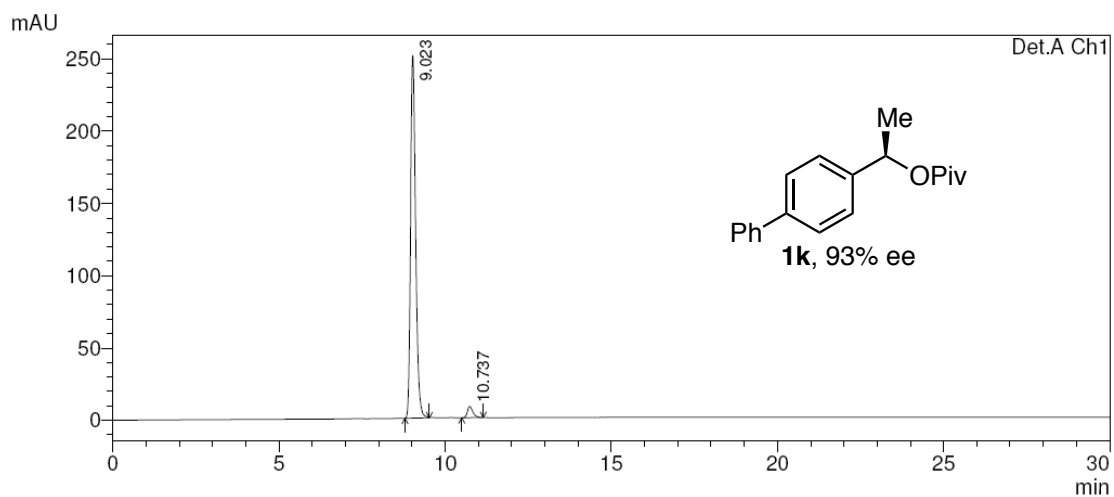

Detector A Ch1 254nm

| Peak# | Ret. Time | Area    | Height | Area %  | Height % |
|-------|-----------|---------|--------|---------|----------|
| 1     | 9.023     | 2670459 | 250803 | 96.736  | 96.996   |
| 2     | 10.737    | 90112   | 7769   | 3.264   | 3.004    |
| Total |           | 2760571 | 258572 | 100.000 | 100.000  |
